# Supplementary material for: An evaluation of M2+ interference correction approaches associated with As and Se in ICP-MS using a multi-day dataset along with ICP-MS/MS/HR-ICP-MS based analysis and hierarchical modeling as a means of assessing bias in fortified drinking waters and single component matrices
Source: Royal Society of Chemistry journal article supplement (doi:10.1039/d1ja00407g), 2022-01-01
Supplement: d1ja00407g1.pdf [file d1ja00407g1.pdf]

Modeling workflow supplement: An evaluation of M2+ interference correction approaches associated with As and Se in ICP-MS using a multi-day dataset along with ICP-MS/MS/HR-ICP-MS based analysis and hierarchical modeling as a means of assessing bias in fortified drinking waters and single component matrices

January 12, 2022

## Contents

|                                       |           |
|---------------------------------------|-----------|
| <b>Background</b>                     | <b>3</b>  |
| <b>Import and mung data</b>           | <b>3</b>  |
| <b>Visualize data</b>                 | <b>4</b>  |
| <b>Model structure</b>                | <b>16</b> |
| Linear model for $\mu$ . . . . .      | 16        |
| <b>Fitting a model for arsenic</b>    | <b>17</b> |
| Tabular parameter estimates . . . . . | 19        |
| Model checks . . . . .                | 22        |
| Density overlay . . . . .             | 22        |
| Leave-one-out CV . . . . .            | 28        |
| <b>A more flexible arsenic model</b>  | <b>30</b> |
| Tabular parameter estimates . . . . . | 33        |
| Model checks . . . . .                | 38        |
| Density overlay . . . . .             | 38        |
| Leave-one-out CV . . . . .            | 44        |
| K-fold CV . . . . .                   | 45        |
| <b>A final model for arsenic</b>      | <b>46</b> |
| Tabular parameter estimates . . . . . | 49        |
| Model checks . . . . .                | 55        |
| Density overlay . . . . .             | 56        |

|                                       |            |
|---------------------------------------|------------|
| Median . . . . .                      | 61         |
| Min . . . . .                         | 66         |
| Max . . . . .                         | 71         |
| K-fold CV . . . . .                   | 76         |
| Posterior inferences . . . . .        | 76         |
| Conditional means . . . . .           | 76         |
| $\mu$ . . . . .                       | 76         |
| $\sigma$ . . . . .                    | 79         |
| Residual Correlations . . . . .       | 82         |
| Predictions . . . . .                 | 83         |
| Hypothetical data . . . . .           | 83         |
| Day . . . . .                         | 85         |
| Matrix . . . . .                      | 87         |
| New day and matrix . . . . .          | 89         |
| <b>A final model for selenium</b>     | <b>91</b>  |
| Tabular parameter estimates . . . . . | 93         |
| Model checks . . . . .                | 100        |
| Density overlay . . . . .             | 101        |
| Median . . . . .                      | 106        |
| Min . . . . .                         | 111        |
| Max . . . . .                         | 116        |
| Posterior inferences . . . . .        | 121        |
| Conditional means . . . . .           | 121        |
| $\mu$ . . . . .                       | 121        |
| $\sigma$ . . . . .                    | 124        |
| Residual Correlations . . . . .       | 126        |
| Predictions . . . . .                 | 127        |
| Day . . . . .                         | 127        |
| Matrix . . . . .                      | 129        |
| New day and matrix . . . . .          | 131        |
| <b>References</b>                     | <b>133</b> |
| <b>Session Info</b>                   | <b>133</b> |

## Background

In this document, the results of model fitting, checking, and inferences are provided along with the code and workflow. The objectives of the modeling effort were to (1) estimate the effects of the experimental factors (i.e., matrix, day, and tune) on the accuracy and precision of using different internal standards (i.e., in-sample, alt.isotope, etc.) to predict the shifts in the M2+/M1+ factor. The accuracy of these predictions for  $^{75}\text{As}$  ( $^{150}\text{Nd}^{2+}$  and  $^{150}\text{Sm}^{2+}$ ) and Se ( $^{156}\text{Gd}^{2+}$ ) were determined using ICP-MS/MS/HR-ICP-MS (i.e., “True Value” or, henceforth, “TV”) ; and (2) to predict out-of-sample observations in order to quantify expectations about the future performance of these internal standard methods.

This document begins with a section describing the preparation of the experimental data for use in the subsequent modeling. Then there is a section explaining the model’s structure. That section is followed by one describing the priors used for each parameter in the model and the implied prior predictive distribution. The next sections then describe model fits, checks, and inferences.

## Import and mung data

The data is imported from the local directory and stored as an object in R. All code is not shown in the html notebook, but is available in the R markdown document (i.e., .rmd file).

Print dataframes for both As and Se.

```
## # A tibble: 352 x 14
##   ider      matrix day_expt tune      Alt      Ho2      In      Std      Sc      Y
##   <chr>    <fct> <fct> <fct> <dbl> <dbl> <dbl> <dbl> <dbl> <dbl>
## 1 water_~ water~ 316   LHe  -0.0553 -0.0113 -0.204 -0.0593 -0.262 -0.240
## 2 water_~ water~ 316   LHe  -0.047  -0.0199 -0.112 -0.0881 -0.169 -0.122
## 3 water_~ water~ 316   LHe  -0.104  -0.0816 -0.274 -0.0951 -0.367 -0.322
## 4 neat_1~ neat_1 316   LHe   0.121   0.213   0.0695  0.113   0.0889  0.0918
## 5 water_~ water~ 316   LHe   0.0596  0.151  -0.008  0.118  -0.0866 -0.0454
## 6 water_~ water~ 316   LHe   0.119   0.119   0.0491  0.0742  0.0207  0.0362
## 7 water_~ water~ 316   LHe   0.013   0.0321 -0.0858  0.0334 -0.0987 -0.102
## 8 water_~ water~ 316   LHe   0.0515  0.123  -0.0012  0.0909  0.0251  0.0012
## 9 water_~ water~ 316   LHe   0.0621  0.0341 -0.132   0.0738 -0.159  -0.173
## 10 neat_2~ neat_2 316   LHe   0.0723  0.146  -0.0164  0.116   0.058   0.0127
## # ... with 342 more rows, and 4 more variables: Be <dbl>, Co <dbl>, Th <dbl>,
## #   Ho1 <dbl>
```

```
## # A tibble: 352 x 14
##   ider      matrix day_expt tune      Alt      Ho2      In      Std      Sc      Y
##   <chr>    <fct> <fct> <fct> <dbl> <dbl> <dbl> <dbl> <dbl> <dbl>
## 1 water_1316L~ water~ 316   LHe  -1.68  -0.531 -3.04   0.387 -3.81  -3.51
## 2 water_3316L~ water~ 316   LHe  -1.09  -2.01  -3.19  -2.09 -3.93  -3.33
## 3 water_4316L~ water~ 316   LHe  -0.694  0.744 -1.75  -0.271 -2.95  -2.38
## 4 neat_1316LHe neat_1 316   LHe  -1.54  -0.408 -2.24  -1.90 -2.00  -1.96
## 5 water_5316L~ water~ 316   LHe  -0.940 -0.161 -2.19  -1.13 -3.19  -2.67
## 6 water_6316L~ water~ 316   LHe  -1.38  -0.707 -1.59  -1.00 -1.96  -1.76
## 7 water_7316L~ water~ 316   LHe  -1.01  -0.119 -1.62  -0.184 -1.78  -1.83
## 8 water_8316L~ water~ 316   LHe  -1.41  -0.132 -1.71   0.655 -1.38  -1.68
## 9 water_9316L~ water~ 316   LHe  -1.26  -0.178 -2.31   0.610 -2.65  -2.84
## 10 neat_2316LHe neat_2 316   LHe  -0.964  1.12  -0.927  0.339  0.0133 -0.559
## # ... with 342 more rows, and 4 more variables: Be <dbl>, Co <dbl>, Th <dbl>,
## #   Ho1 <dbl>
```

For each of As and Se, there were 352 observations of the difference between the IS (internal standards) corrected estimate and the “True Value” (“diff\_std”) for each of the 10 IS methods over 8 days, 20 matrices, and 2 tune settings. For clarification, the “day\_expt” column is a concatenation of month and day corresponding to each of the 8 days of the experiment. The “tune” variable describes the tune setting (high helium = HHe or low helium = LHe) used for each observation. The “matrix” column is self-explanatory. The last 10 columns contain the results for each of the IS methods.

## Visualize data

Below is a plot of observed bias (relative to “TV”) by tune setting for each IS method for Arsenic.

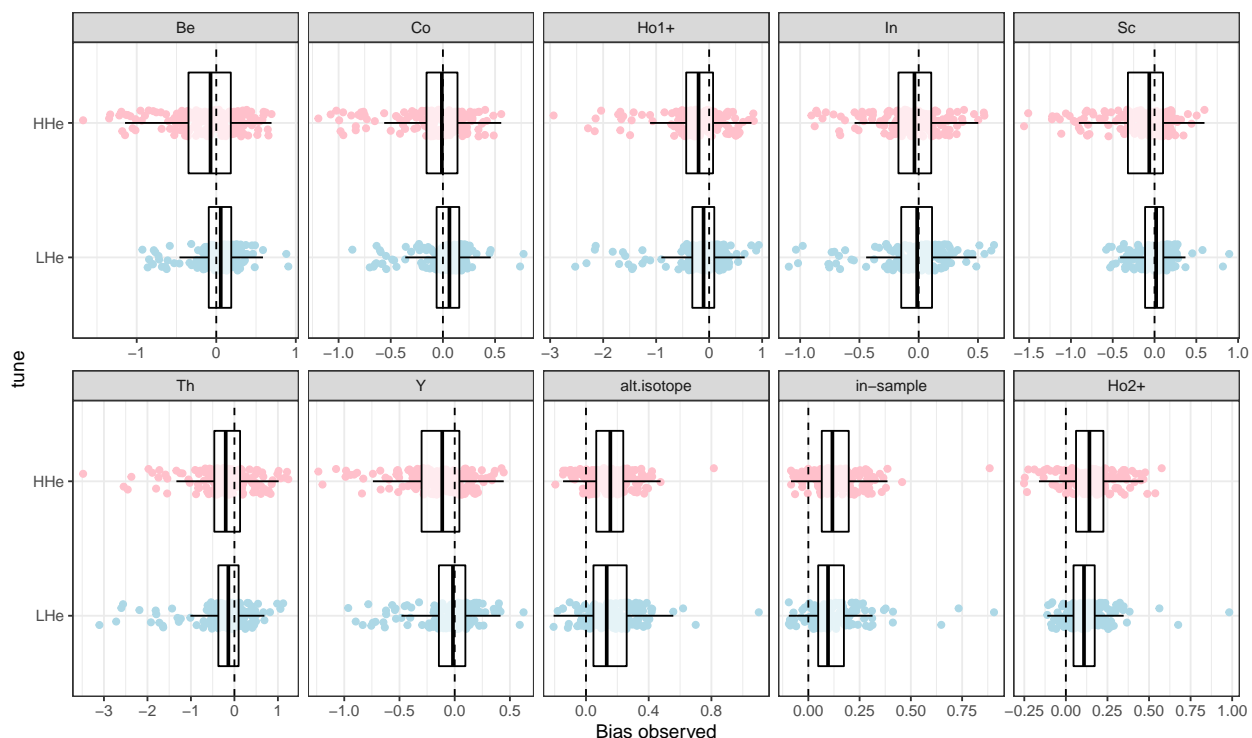

The above plot suggests slight under-corrections, on average, for all of the +2 internal standard methods. Most of the +1 methods look to have over-corrected or resulted in minimal bias, on average. Within method, there are no clear differences in this figure due to tune setting for any method.

Next, the same plot for the selenium observations.

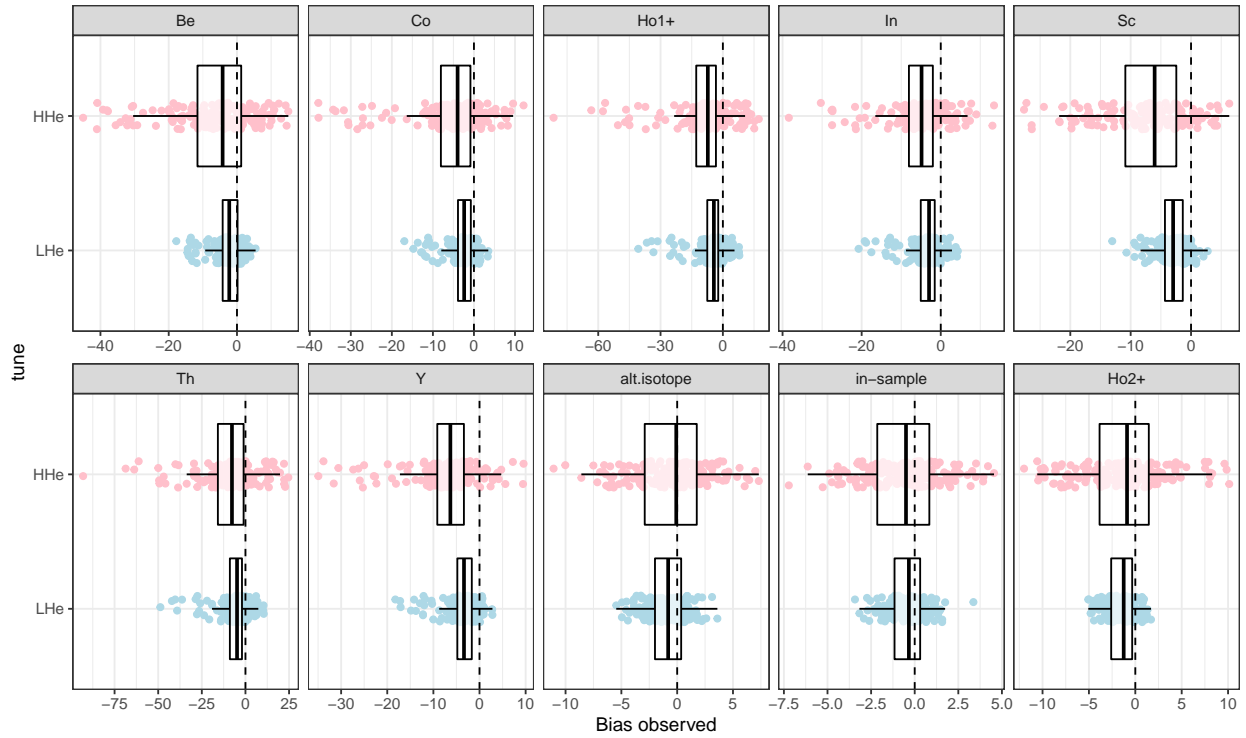

For selenium, above, the +2 methods look to be unbiased to slightly over-corrected, on average. The +1 methods all tended to over-correct fairly clearly. Within method, there looks to be clearer indication of differences due to tune setting for some of the +1 methods: *Y* and *Sc* in particular. Otherwise, tune effects are not clear.

Next, a plot of observations by method and day of the experiment for arsenic.

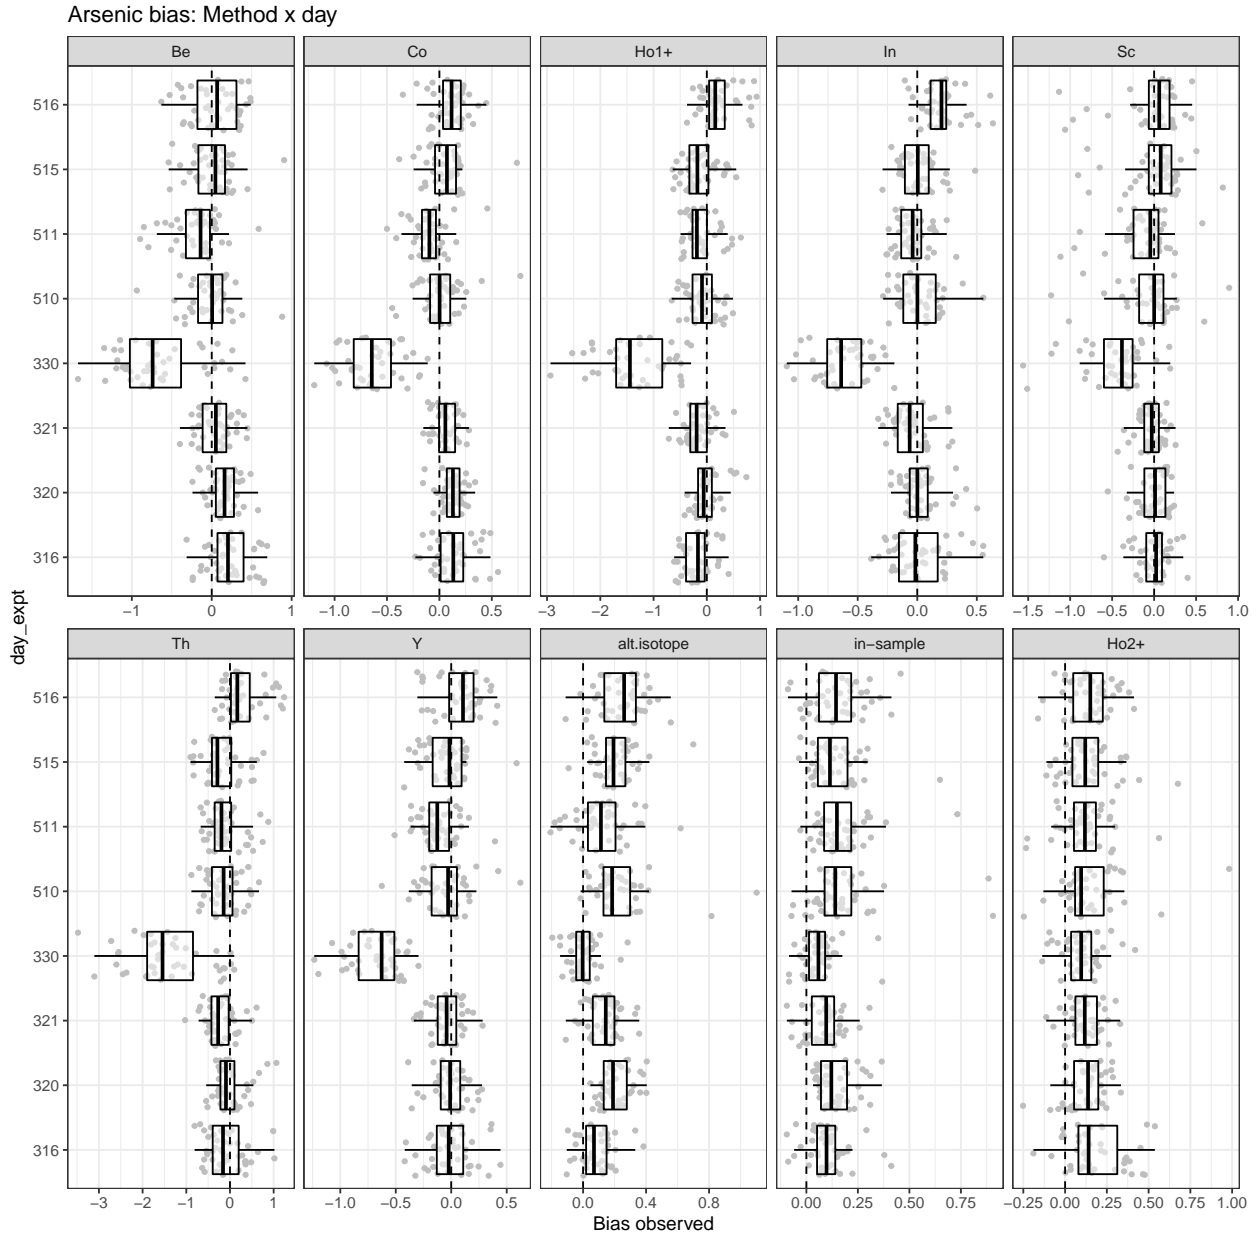

Above, the bias looks to have varied by day, most clearly for the +1 methods. In particular, the day of the cone change (3/30) sticks out as having greater tendency for over-corrections. The cone change looks to have been less important for the +2 methods; though day to day variability was otherwise similar.

And the same plot for selenium.

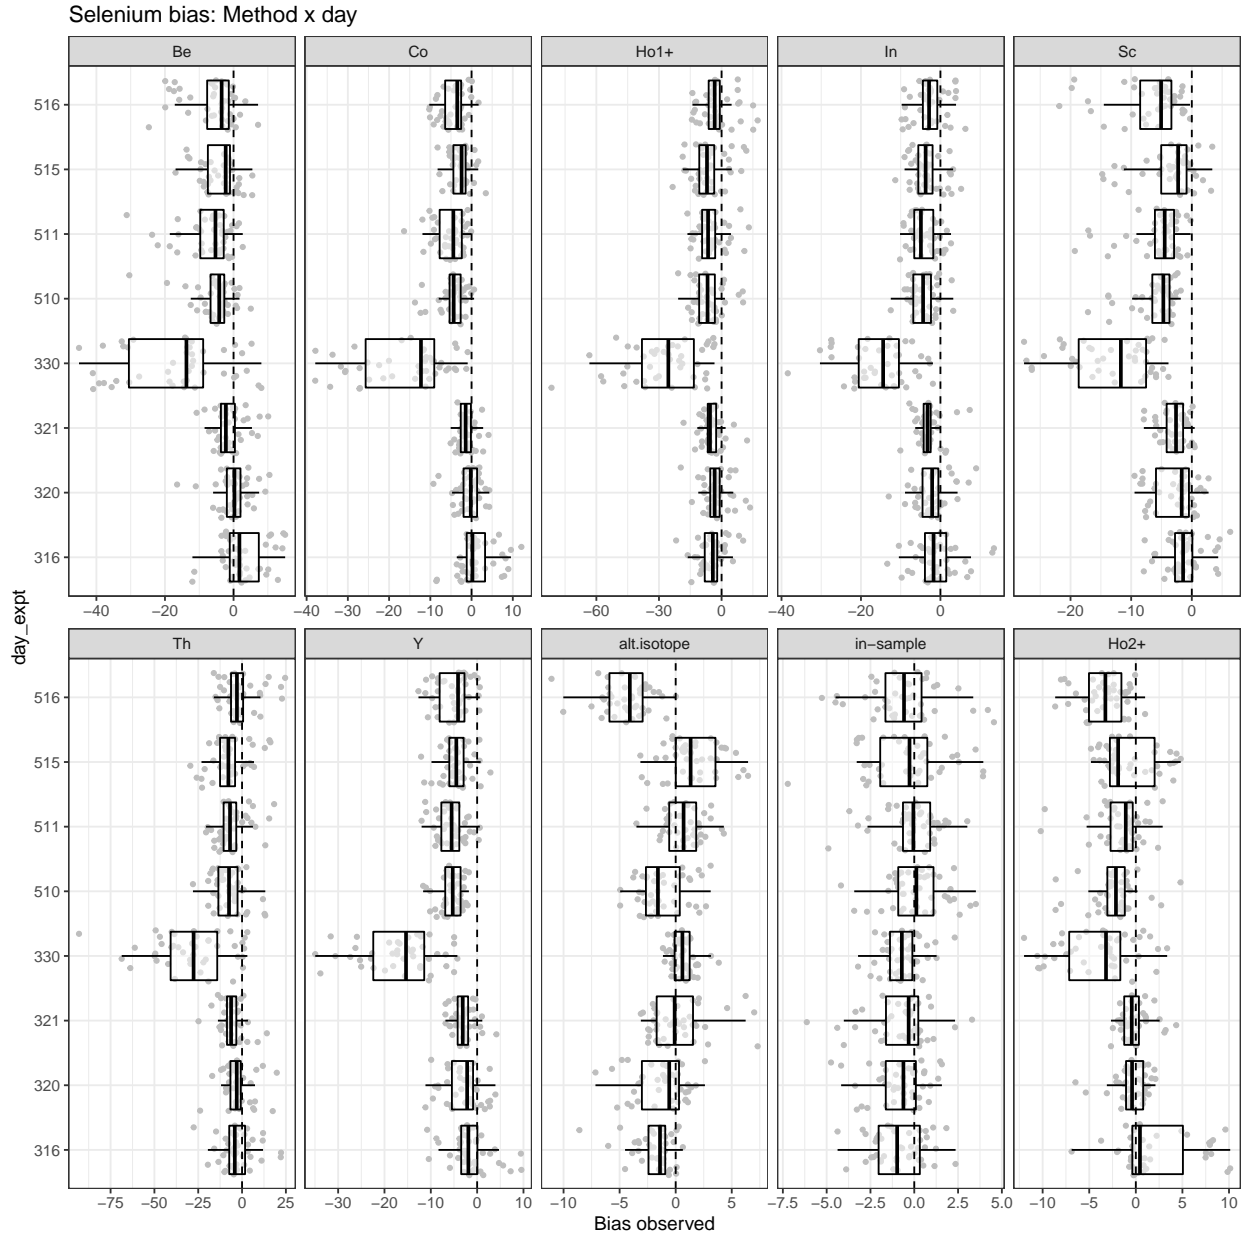

The pattern for selenium is similar as with arsenic above. However, the day to day variability for the +2 methods looks perhaps more pronounced compared to the +2 methods with arsenic.

Next, a similar plot, but dividing the panels by matrix within method for arsenic.

Arsenic bias: Method x matrix

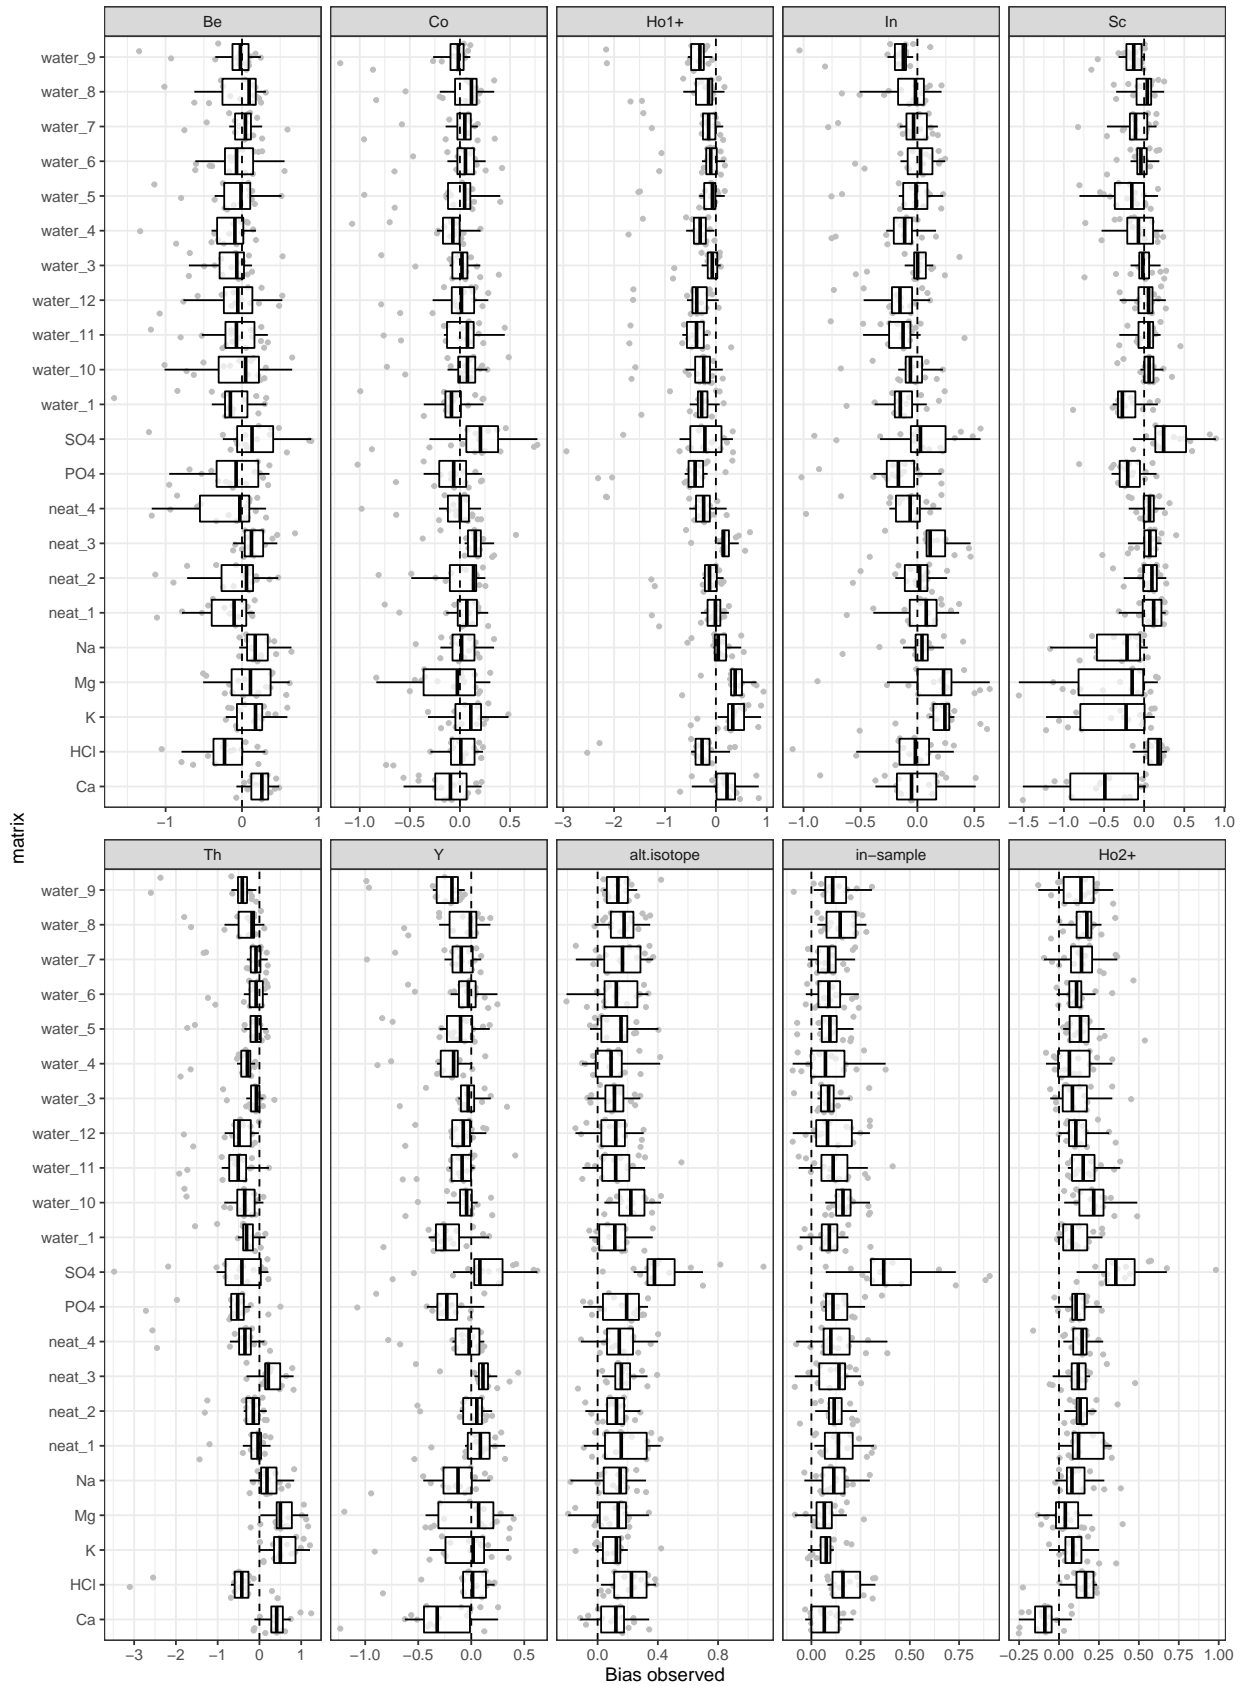



Matrix to matrix variation in bias looks less severe compared to variation by day above. Inferences concerning differences are frustrated more by noise here due to only 16 observations per box. However, looking at  $Sc$ , for example, reduced precision and larger over-corrections in the  $Na$ ,  $Mg$ ,  $K$ , and  $Ca$  matrices relative to other matrices stands out. Similarly, the  $SO_4$  matrix in the +2 methods stands out as potentially inducing larger under-corrections relative to all other matrices for those methods.

And the same plot for selenium.

Selenium bias: Method x matrix

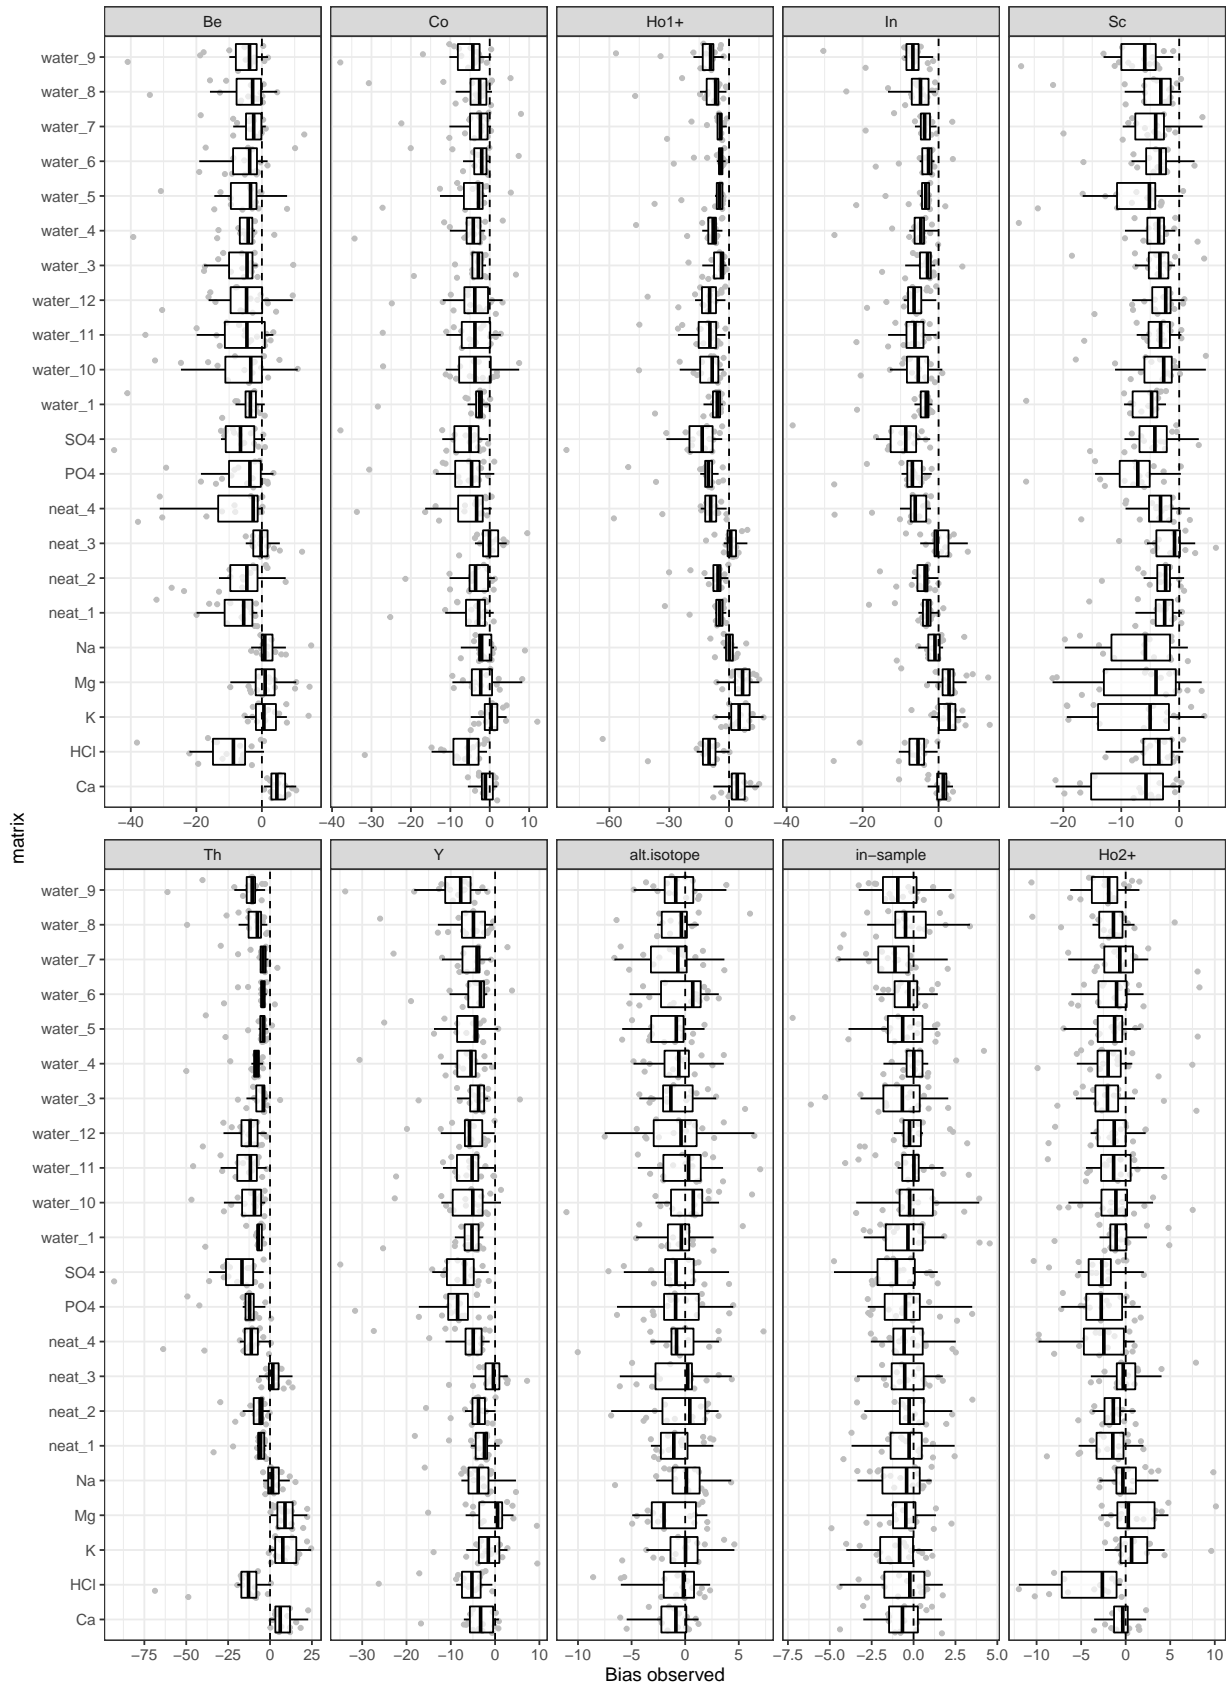

In terms of overall variability due to matrix, this one is very similar to the one for arsenic preceding. Interestingly, the  $SO_4$  matrix doesn't stick out for the +2 methods here, though the pattern for  $Sc$  and the 250ppm matrices is similar to the arsenic plot above.

Next is another plot of the observed bias by day (e.g., 516 = 5/16) for arsenic measured for each IS method, but also divided according to tune (red = LHe; blue = HHe).

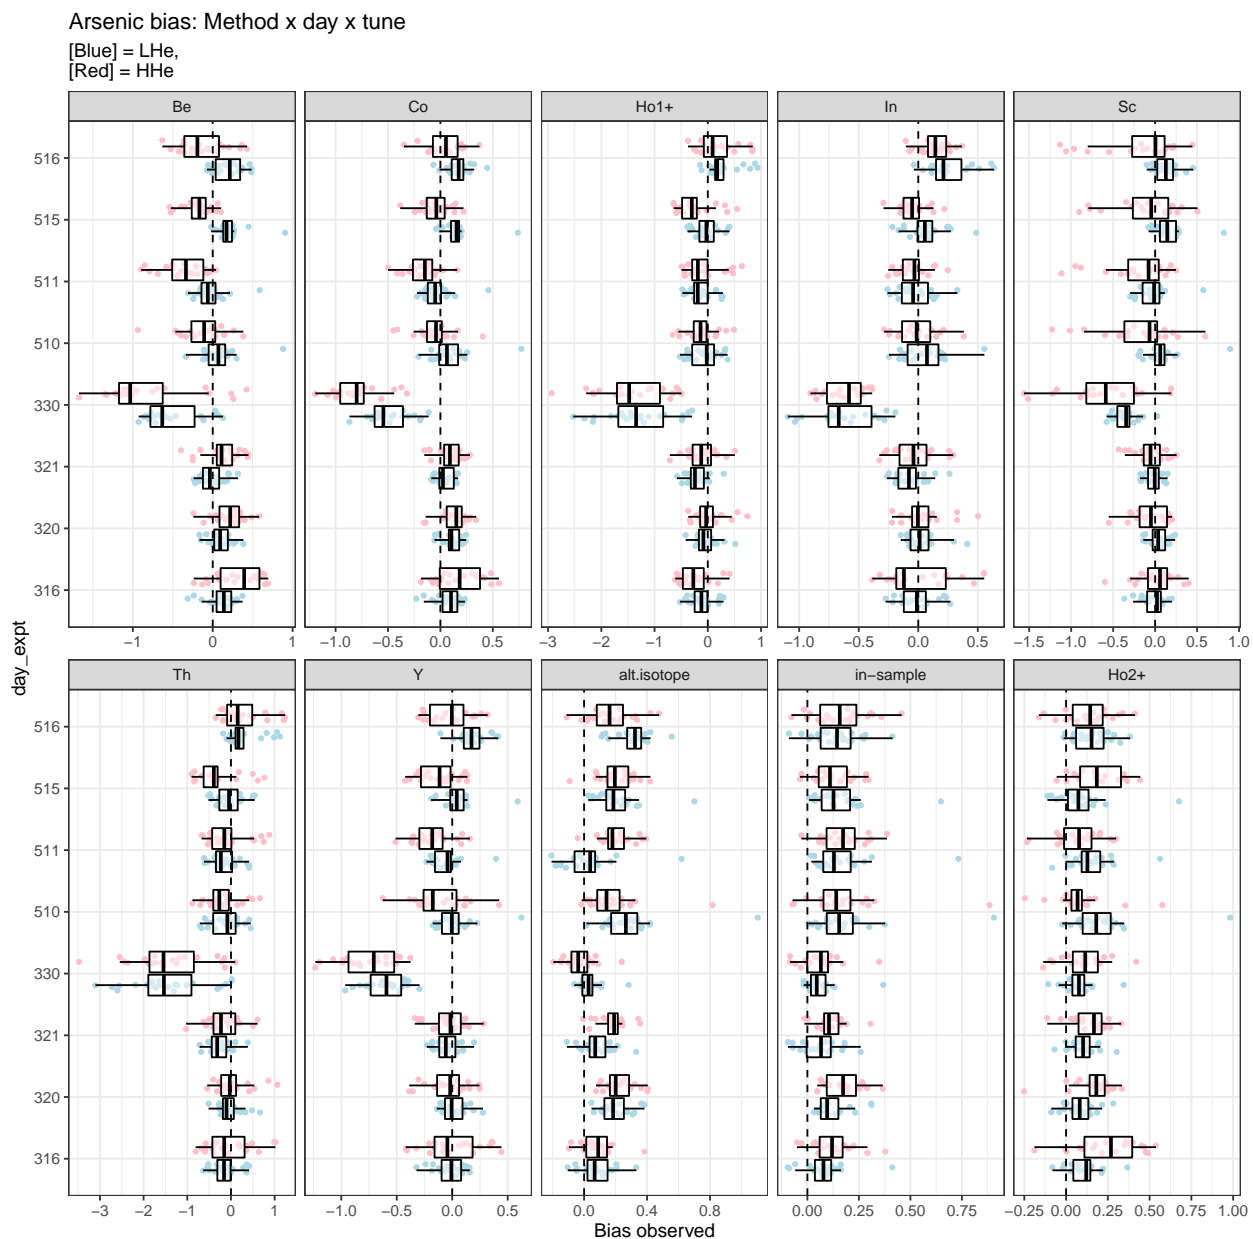

The general patterns by day are still apparent. There are some distinctions within days indicating that the effect of tune may depend on the day (e.g., alt.isotope on 3/21 and 5/11;  $Co$  on 3/30 and 5/15; etc.).

And the same plot for selenium is below.

Selenium bias: Method x day x tune

[Blue] = LHe,  
[Red] = HHe

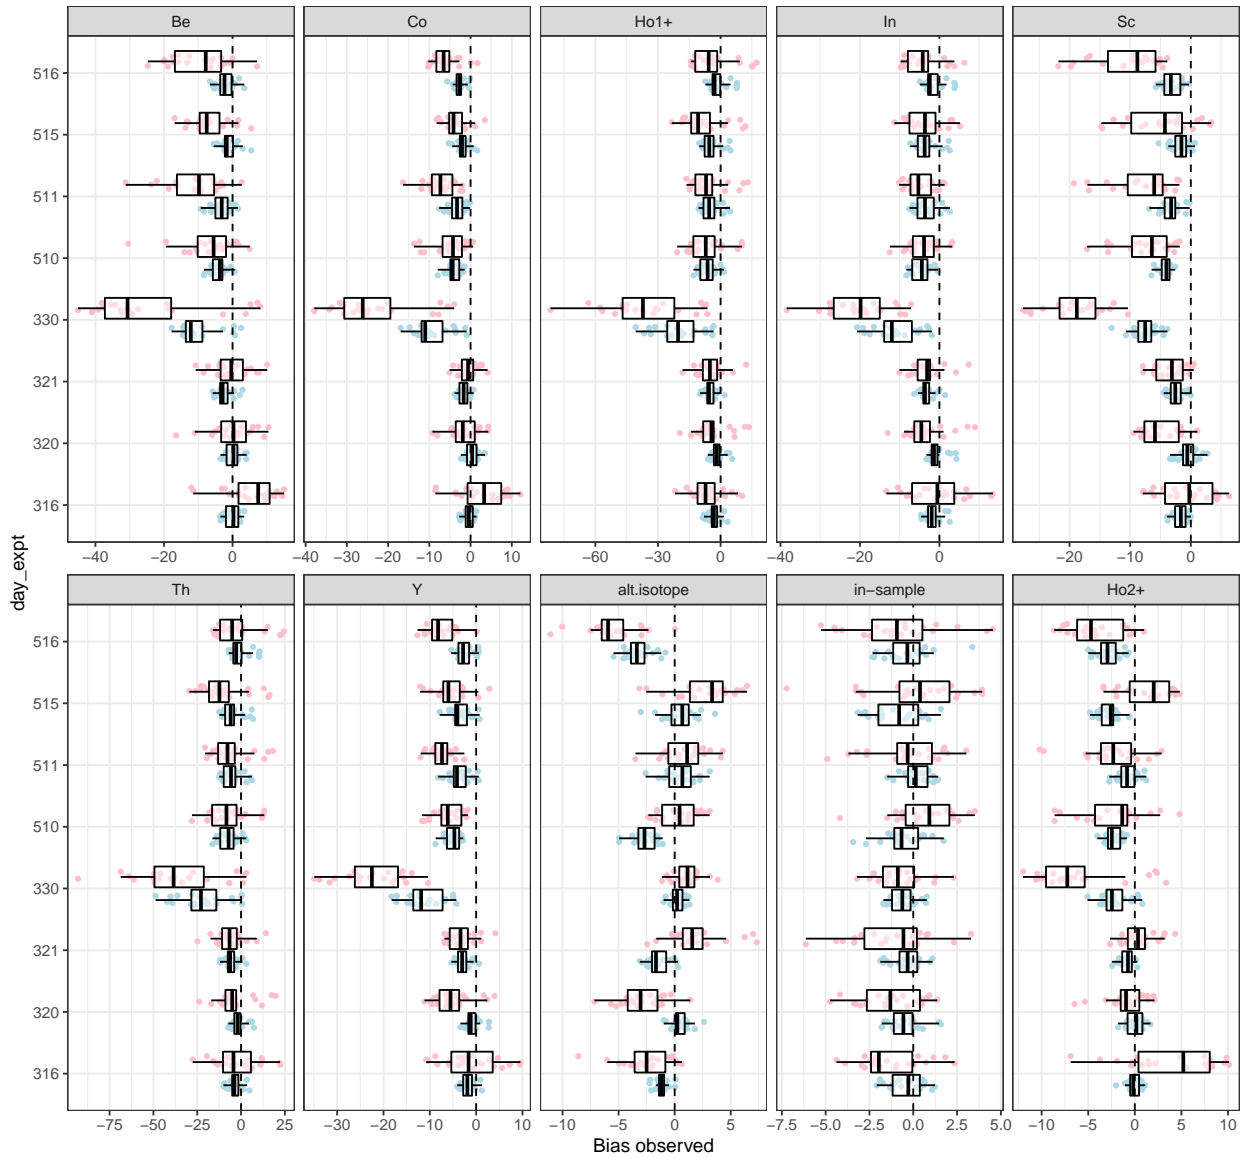

This one above is similar to the arsenic plot preceding, though there look to be more cases where the tune effect potentially differs by day for some methods. That is, the tune effect looks potentially clearer in some cases.

Next, a similar plot, but dividing the panels by matrix and tune within method for arsenic.

Arsenic bias: Method x matrix x tune

[Blue] = LHe,

[Red] = HHe

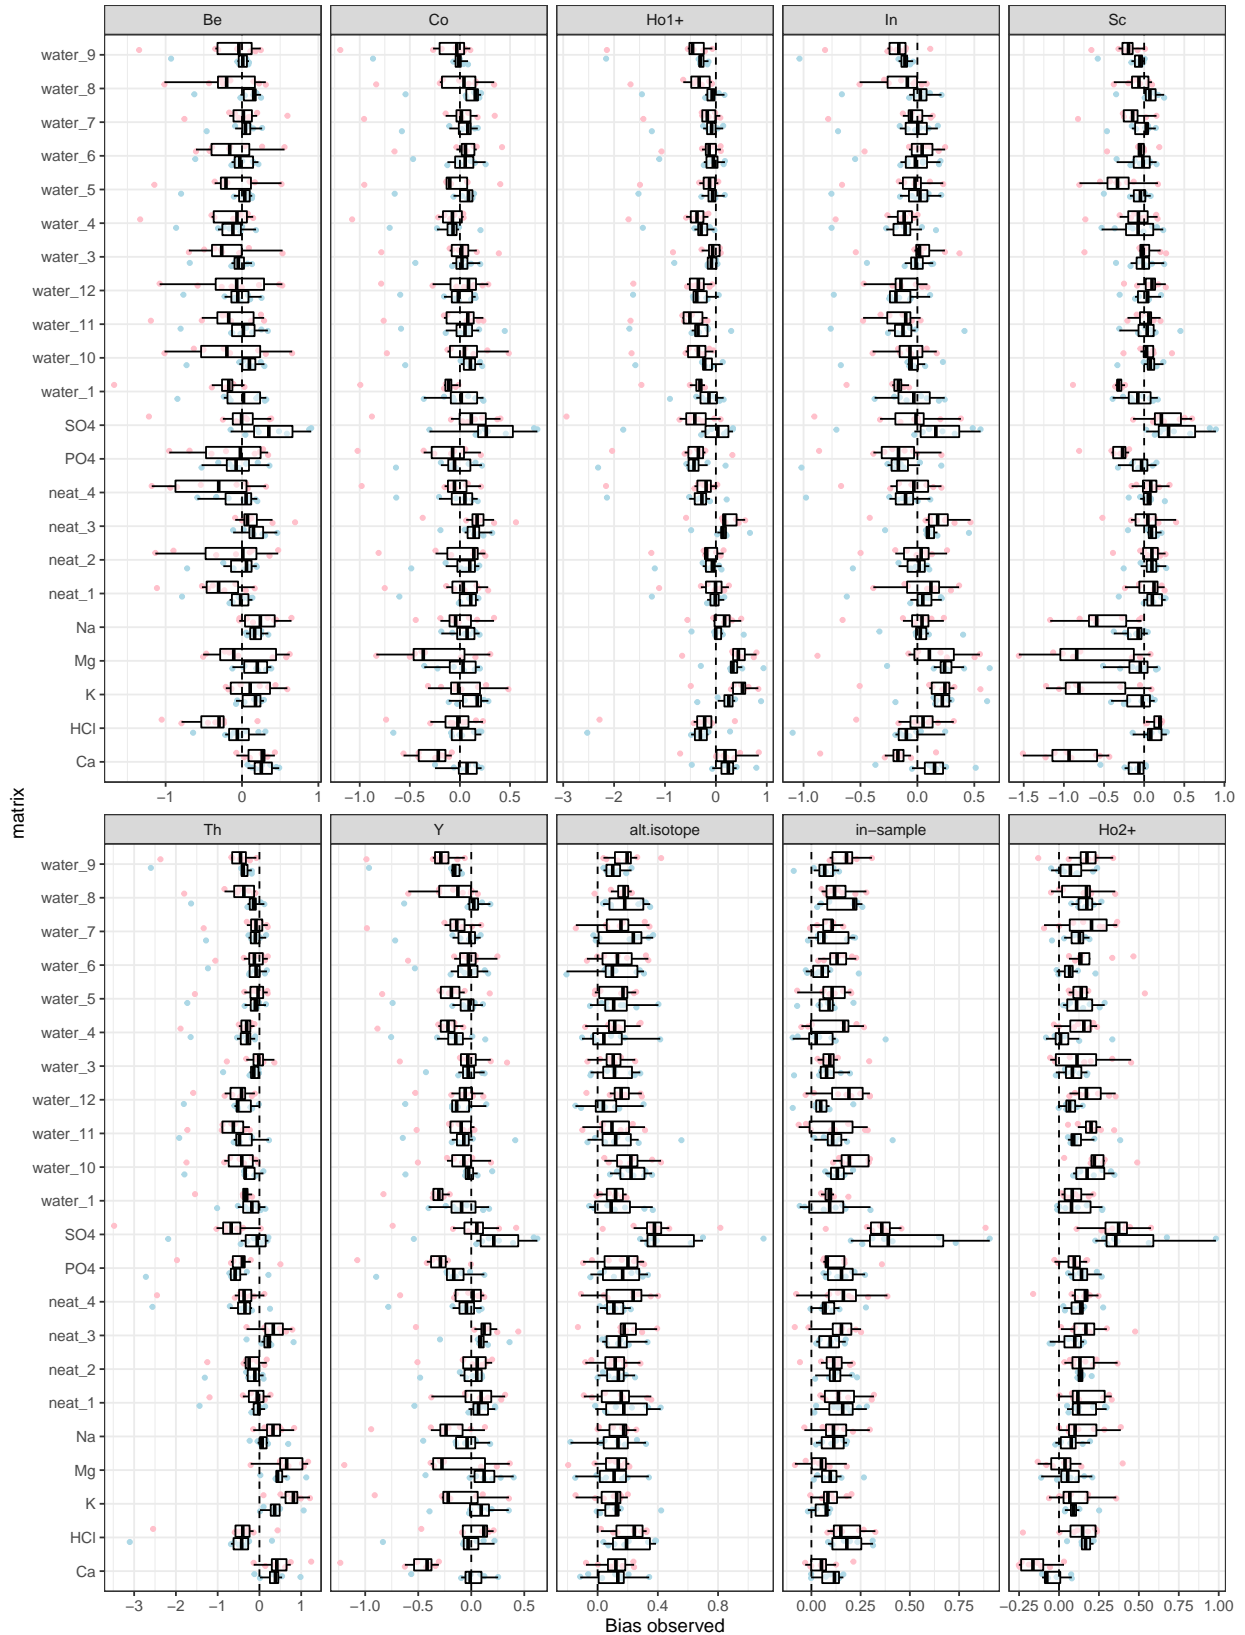

There are only 8 observations per box above, but matrix to matrix variability in bias again seems smaller compared to day to day above; and the patterns in the 250ppm matrices for the +2 methods are apparent. Within matrix, there are a few potential differences here and there according to tune.

And finally the same plot for selenium.

Selenium bias: Method x matrix x tune

[Blue] = LHe,  
[Red] = HHe

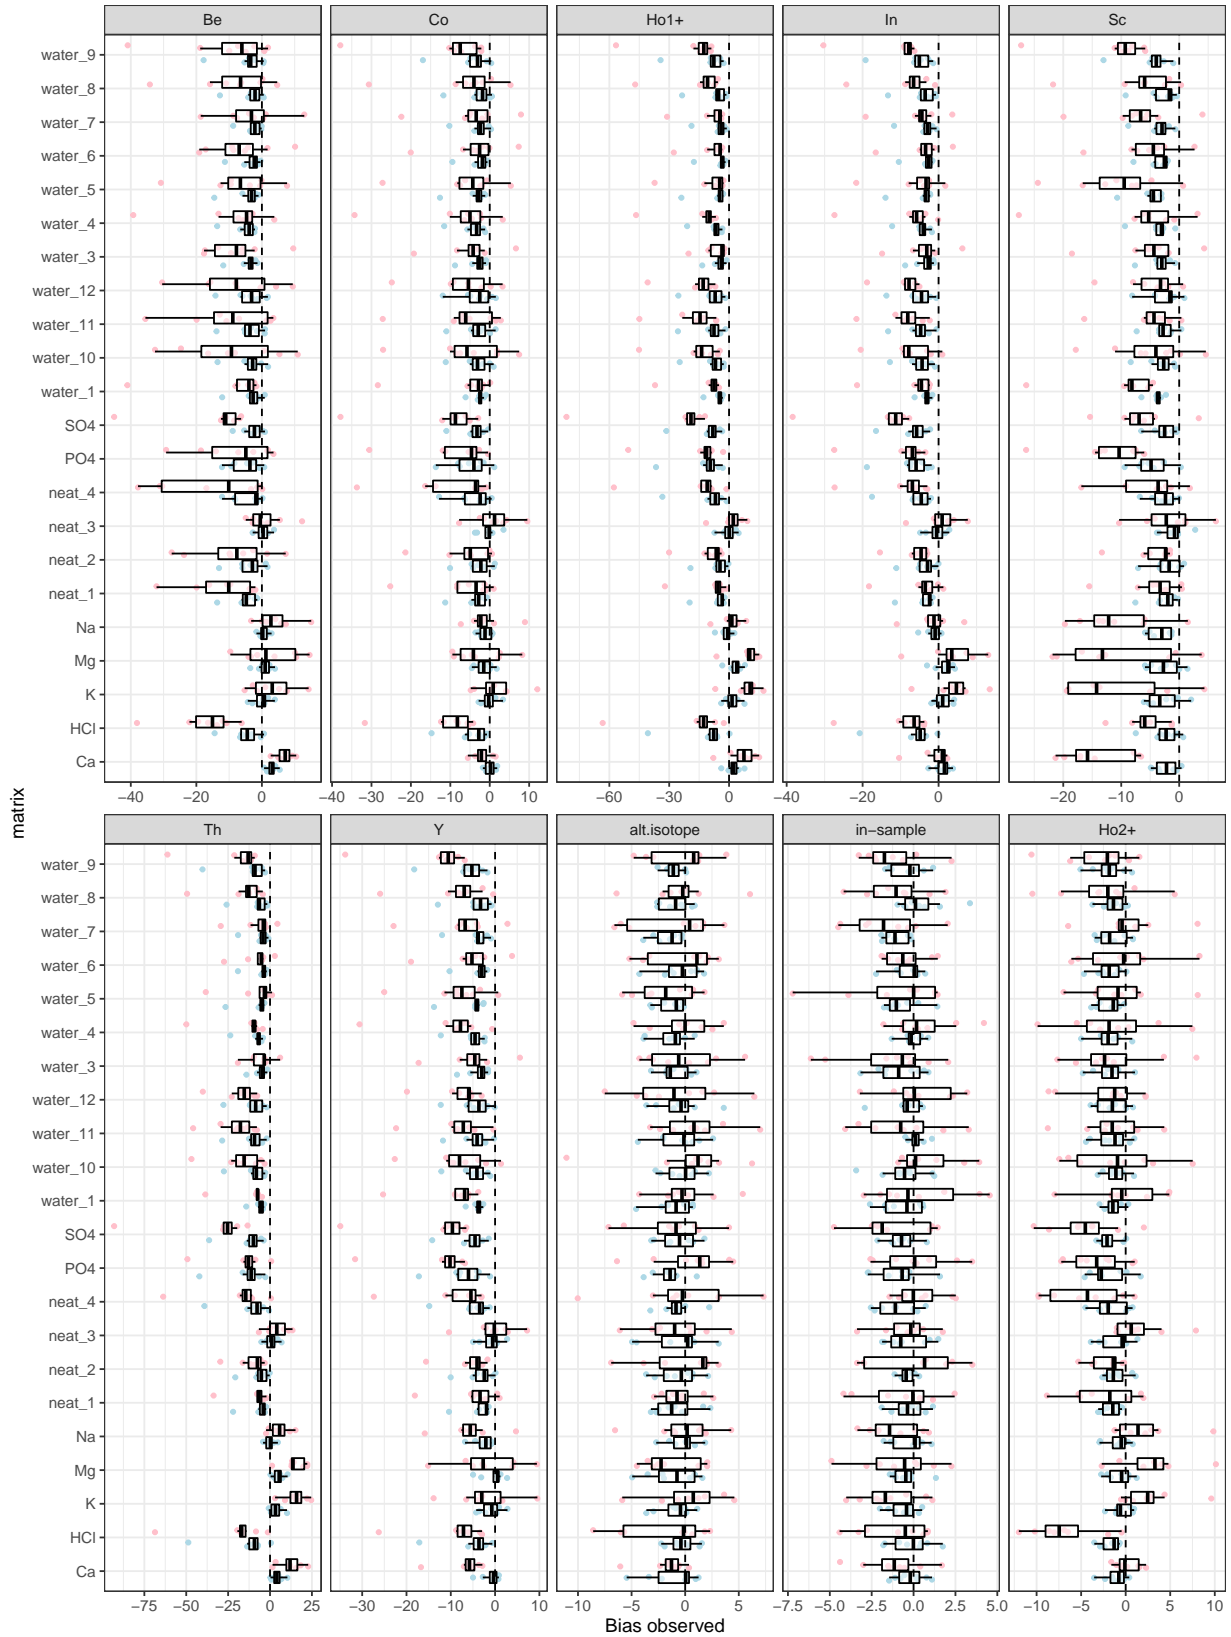

Again, the overall patterns are similar to the plot above, but within matrix differences due to tune setting are more pronounced in some cases.

## Model structure

Because all 10 IS were included in each physical sample run from a given matrix on a given day, the data were treated as a multivariate response (i.e., 352 observations on 10 IS methods), allowing for observation-level correlation between the IS methods. A multilevel Bayesian approach to modeling was taken, with each model conditioned in some manner on all of the experimental design factors (matrix, day, and tune). However, not all potential interactions among the experimental factors were able to be estimated because the number of observations available to estimate them was limited. For example, there was no replication of observations within a matrix and day of the experiment using the same tune setting for any IS method. For each IS in a specific matrix and specific day, only a single measurement was taken at each tune setting (i.e.,  $n=1$  for estimating a method  $\times$  matrix  $\times$  day  $\times$  tune effect). Likewise, matrix  $\times$  day effects were not estimated due to limited information ( $n = 2$  per IS method, corresponding to 2 tune settings).

The models to follow assumed that the observed bias (difference to the nearest 0.001 ppb between the “True Value” and IS estimated correction value) was generated from a multivariate normal (MVN) distribution, where:

$$Y \sim MVN(\mu, \Sigma)$$

where  $Y$  is a multivariate response matrix of size  $J = 10$  columns and  $N = 352$  rows;  $\mu$  is the location parameter of the multivariate normal data generating process; and  $\Sigma$  is the covariance matrix containing the scale parameters for each of the  $J = 10$  methods on the diagonal, and the between-method correlation parameters on the off-diagonals.

### Linear model for $\mu$

For the first model fit below, the location parameter was parameterized such that:

$$\begin{aligned} \mu_j &= \alpha_j + \beta_j * X_{tune_j} + \gamma_{K_j} + \gamma_{L_j} \\ \gamma_{K_j} &\sim N(0, \sigma_{K_j}) \\ \gamma_{L_j} &\sim N(0, \sigma_{L_j}) \end{aligned}$$

where  $\alpha_j$  references a fixed global intercept for each IS method,  $j \in 1, \dots, J = 10$ . This intercept parameter represents the global mean of the low helium tune (LHe) observations for each method,  $j$ . The individual observations are not indexed in the notation above, but each of  $i \in i = 1, \dots, N = 352$  observations per method is fit to the same  $\alpha_j$ . The  $\beta_j$  parameter captures the additive effect of the HHe tune on the global mean for each IS method.  $X_{tune_j}$  represents a vector holding the tune setting indicator (0 or 1) for each observation, entered as data. The  $\gamma_{K_j}$  term references varying effects, or intercepts, for each of  $k \in 1, \dots, K = 22$  matrix conditions for each method; and  $\gamma_{L_j}$  references varying effects for each of the  $l \in 1, \dots, L = 8$  days of the experiment. These varying effects are centered on zero and can vary around the global intercept parameter, the degree to which is determined by a hierarchical scale parameters,  $\sigma_{K_j}$  and  $\sigma_{L_j}$ , estimated from the data.

In the formula syntax of the **R** package **lme4** commonly used to fit mixed effects models, the formula for the linear predictor for  $\mu$  above, would be:

$$1 + tune + (1|matrix) + (1|day)$$

This is the equivalent syntax employed in the **brms** package (Bürkner 2017), which is used to fit the models below.



## Fitting a model for arsenic

The **brms** package (Bürkner 2017) makes it convenient to fit and compare multilevel generalized linear models in a fully Bayesian framework. Below, the model described above is fit to the observational data. For each parameter described above, priors were provided as indicated in the code below. Specifically,  $N(0, 1)$  priors were placed over all intercept parameters for each response. This prior is considered weakly informative on the the scale of the observations. This  $N(0, 1)$  prior was also placed on the scale parameters of the varying effects, which was also considered weakly informative. Covariances in **Stan** (Stan Development Team 2018c, 2018a, 2018b) are parameterized efficiently by placing priors separately on the standard deviations and the correlation matrix. The covariance term for the multivariate model is parameterized such that:

$$\Sigma = \text{diag}(\tau)\Omega\text{diag}(\tau)$$

so priors are placed separately on  $\tau$ , the vector of standard deviations for each IS method, and  $\Omega$  the correlation matrix. For each standard deviation in the model below, the  $N(0, 1)$  prior was again applied and assumed weakly informative. For the correlation matrix, an  $LKJ(\eta = 1)$  prior was used, which is uniform over permissible correlation matrices. For more information on prior choice recommendations, see: <https://github.com/stan-dev/stan/wiki/Prior-Choice-Recommendations>

```
load("full-analysis-files/df_mv_as.rda")

bf_Std <- bf(Std ~ tune + (1 | matrix) + (1 | day_expt),
            family = gaussian())

bf_Alt <- bf(Alt ~ tune + (1 | matrix) + (1 | day_expt),
            family = gaussian())

bf_Ho2 <- bf(Ho2 ~ tune + (1 | matrix) + (1 | day_expt),
            family = gaussian())

bf_In <- bf(In ~ tune + (1 | matrix) + (1 | day_expt),
            family = gaussian())

bf_Sc <- bf(Sc ~ tune + (1 | matrix) + (1 | day_expt),
            family = gaussian())

bf_Y <- bf(Y ~ tune + (1 | matrix) + (1 | day_expt),
            family = gaussian())

bf_Be <- bf(Be ~ tune + (1 | matrix) + (1 | day_expt),
            family = gaussian())

bf_Co <- bf(Co ~ tune + (1 | matrix) + (1 | day_expt),
            family = gaussian())

bf_Th <- bf(Th ~ tune + (1 | matrix) + (1 | day_expt),
            family = gaussian())

bf_Ho1 <- bf(Ho1 ~ tune + (1 | matrix) + (1 | day_expt),
            family = gaussian())

mod1 <- brm(bf_Std +
            bf_Alt +
            bf_Ho2 +
```

```

    bf_In +
    bf_Sc +
    bf_Y +
    bf_Be +
    bf_Co +
    bf_Th +
    bf_Ho1 +
    set_rescor(TRUE),
data = df_mv_as,
prior = c(prior(normal(0, 1), class = "Intercept", resp = "Std"),
prior(normal(0, 1), class = "Intercept", resp = "Alt"),
prior(normal(0, 1), class = "Intercept", resp = "Ho2"),
prior(normal(0, 1), class = "Intercept", resp = "In"),
prior(normal(0, 1), class = "Intercept", resp = "Sc"),
prior(normal(0, 1), class = "Intercept", resp = "Y"),
prior(normal(0, 1), class = "Intercept", resp = "Be"),
prior(normal(0, 1), class = "Intercept", resp = "Co"),
prior(normal(0, 1), class = "Intercept", resp = "Th"),
prior(normal(0, 1), class = "Intercept", resp = "Ho1"),

prior(normal(0, 1), class = "b", resp = "Std"),
prior(normal(0, 1), class = "b", resp = "Alt"),
prior(normal(0, 1), class = "b", resp = "Ho2"),
prior(normal(0, 1), class = "b", resp = "In"),
prior(normal(0, 1), class = "b", resp = "Sc"),
prior(normal(0, 1), class = "b", resp = "Y"),
prior(normal(0, 1), class = "b", resp = "Be"),
prior(normal(0, 1), class = "b", resp = "Co"),
prior(normal(0, 1), class = "b", resp = "Th"),
prior(normal(0, 1), class = "b", resp = "Ho1"),

prior(normal(0, 1), class = "sd", resp = "Std"),
prior(normal(0, 1), class = "sd", resp = "Alt"),
prior(normal(0, 1), class = "sd", resp = "Ho2"),
prior(normal(0, 1), class = "sd", resp = "In"),
prior(normal(0, 1), class = "sd", resp = "Sc"),
prior(normal(0, 1), class = "sd", resp = "Y"),
prior(normal(0, 1), class = "sd", resp = "Be"),
prior(normal(0, 1), class = "sd", resp = "Co"),
prior(normal(0, 1), class = "sd", resp = "Th"),
prior(normal(0, 1), class = "sd", resp = "Ho1"),

prior(normal(0, 1), class = "sigma", resp = "Std"),
prior(normal(0, 1), class = "sigma", resp = "Alt"),
prior(normal(0, 1), class = "sigma", resp = "Ho2"),
prior(normal(0, 1), class = "sigma", resp = "In"),
prior(normal(0, 1), class = "sigma", resp = "Sc"),
prior(normal(0, 1), class = "sigma", resp = "Y"),
prior(normal(0, 1), class = "sigma", resp = "Be"),
prior(normal(0, 1), class = "sigma", resp = "Co"),
prior(normal(0, 1), class = "sigma", resp = "Th"),
prior(normal(0, 1), class = "sigma", resp = "Ho1"),

```

```

      prior(lkj(1), class = "rescor")
    ),
  control = list(adapt_delta = 0.90, max_treedepth = 12),
  init_r = 0.05,
  save_pars = save_pars(all = TRUE),
  seed = 6518,
  chains=4,
  iter=2000,
  cores=4 )

save(mod1, file = "full-analysis-files/mod1_As_mv.rda")

```

## Tabular parameter estimates

Next, a summary of the posterior estimates.

```

## Family: MV(gaussian, gaussian, gaussian, gaussian, gaussian, gaussian, gaussian, gaussian, gaussian)
## Links: mu = identity; sigma = identity
##      mu = identity; sigma = identity
## Formula: Std ~ tune + (1 | matrix) + (1 | day_expt)
##          Alt ~ tune + (1 | matrix) + (1 | day_expt)
##          Ho2 ~ tune + (1 | matrix) + (1 | day_expt)
##          In ~ tune + (1 | matrix) + (1 | day_expt)
##          Sc ~ tune + (1 | matrix) + (1 | day_expt)
##          Y ~ tune + (1 | matrix) + (1 | day_expt)
##          Be ~ tune + (1 | matrix) + (1 | day_expt)
##          Co ~ tune + (1 | matrix) + (1 | day_expt)
##          Th ~ tune + (1 | matrix) + (1 | day_expt)
##          Ho1 ~ tune + (1 | matrix) + (1 | day_expt)
## Data: df_mv_as (Number of observations: 352)
## Draws: 4 chains, each with iter = 2000; warmup = 1000; thin = 1;
##        total post-warmup draws = 4000
##
## Priors:
## b_Alt ~ normal(0, 1)
## b_Be ~ normal(0, 1)
## b_Co ~ normal(0, 1)
## b_Ho1 ~ normal(0, 1)
## b_Ho2 ~ normal(0, 1)
## b_In ~ normal(0, 1)
## b_Sc ~ normal(0, 1)
## b_Std ~ normal(0, 1)
## b_Th ~ normal(0, 1)
## b_Y ~ normal(0, 1)

```

```

## Intercept_Alt ~ normal(0, 1)
## Intercept_Be ~ normal(0, 1)
## Intercept_Co ~ normal(0, 1)
## Intercept_Ho1 ~ normal(0, 1)
## Intercept_Ho2 ~ normal(0, 1)
## Intercept_In ~ normal(0, 1)
## Intercept_Sc ~ normal(0, 1)
## Intercept_Std ~ normal(0, 1)
## Intercept_Th ~ normal(0, 1)
## Intercept_Y ~ normal(0, 1)
## Lrescor ~ lkj_corr_cholesky(1)
## sd_Alt ~ normal(0, 1)
## sd_Be ~ normal(0, 1)
## sd_Co ~ normal(0, 1)
## sd_Ho1 ~ normal(0, 1)
## sd_Ho2 ~ normal(0, 1)
## sd_In ~ normal(0, 1)
## sd_Sc ~ normal(0, 1)
## sd_Std ~ normal(0, 1)
## sd_Th ~ normal(0, 1)
## sd_Y ~ normal(0, 1)
## sigma_Alt ~ normal(0, 1)
## sigma_Be ~ normal(0, 1)
## sigma_Co ~ normal(0, 1)
## sigma_Ho1 ~ normal(0, 1)
## sigma_Ho2 ~ normal(0, 1)
## sigma_In ~ normal(0, 1)
## sigma_Sc ~ normal(0, 1)
## sigma_Std ~ normal(0, 1)
## sigma_Th ~ normal(0, 1)
## sigma_Y ~ normal(0, 1)
##
## Group-Level Effects:
## ~day_expt (Number of levels: 8)
##
##           Estimate Est.Error 1-95% CI u-95% CI Rhat Bulk_ESS Tail_ESS
## sd(Std_Intercept)    0.04    0.02    0.02    0.09 1.00    3085    3089
## sd(Alt_Intercept)    0.10    0.04    0.05    0.19 1.00    2751    2747
## sd(Ho2_Intercept)    0.02    0.01    0.00    0.05 1.00    1993    2426
## sd(In_Intercept)     0.28    0.09    0.16    0.52 1.00    4727    2584
## sd(Sc_Intercept)     0.18    0.07    0.10    0.34 1.00    3073    2982
## sd(Y_Intercept)      0.27    0.09    0.15    0.50 1.00    4822    2657
## sd(Be_Intercept)     0.31    0.10    0.18    0.57 1.00    3370    2977
## sd(Co_Intercept)     0.29    0.10    0.17    0.54 1.00    3525    2850
## sd(Th_Intercept)     0.57    0.17    0.34    0.99 1.00    4401    2902
## sd(Ho1_Intercept)    0.56    0.18    0.32    0.99 1.00    5020    2729
##
## ~matrix (Number of levels: 22)
##
##           Estimate Est.Error 1-95% CI u-95% CI Rhat Bulk_ESS Tail_ESS
## sd(Std_Intercept)    0.06    0.01    0.04    0.08 1.00    1649    2770
## sd(Alt_Intercept)    0.05    0.01    0.03    0.08 1.00    1504    2775
## sd(Ho2_Intercept)    0.06    0.01    0.04    0.09 1.00    1606    2287
## sd(In_Intercept)     0.10    0.02    0.07    0.14 1.00    2511    3094
## sd(Sc_Intercept)     0.17    0.03    0.12    0.24 1.00    2571    3079
## sd(Y_Intercept)      0.08    0.02    0.06    0.12 1.00    2853    2997

```

```

## sd(Be_Intercept)      0.13      0.03      0.09      0.20 1.00      2680      2724
## sd(Co_Intercept)     0.05      0.01      0.03      0.08 1.00      2171      2897
## sd(Th_Intercept)     0.38      0.07      0.28      0.53 1.00      2082      2767
## sd(Ho1_Intercept)    0.26      0.05      0.19      0.38 1.00      2010      2523
##
## Population-Level Effects:
##      Estimate Est.Error 1-95% CI u-95% CI Rhat Bulk_ESS Tail_ESS
## Std_Intercept      0.12      0.02      0.08      0.16 1.00      2900      2697
## Alt_Intercept      0.16      0.04      0.09      0.23 1.00      2720      2988
## Ho2_Intercept      0.12      0.02      0.09      0.16 1.00      3598      3242
## In_Intercept      -0.04      0.11     -0.25      0.19 1.00      2189      2595
## Sc_Intercept      -0.00      0.08     -0.16      0.15 1.00      2227      2478
## Y_Intercept       -0.06      0.10     -0.25      0.14 1.00      2198      2616
## Be_Intercept       0.02      0.12     -0.21      0.26 1.00      2030      2895
## Co_Intercept       0.01      0.10     -0.19      0.22 1.00      2135      2797
## Th_Intercept      -0.23      0.22     -0.66      0.20 1.00      2177      2582
## Ho1_Intercept     -0.19      0.21     -0.62      0.23 1.00      2022      2482
## Std_tuneHHe       0.02      0.01     -0.01      0.04 1.00      4288      3272
## Alt_tuneHHe      -0.00      0.01     -0.03      0.02 1.00      4111      3542
## Ho2_tuneHHe       0.02      0.01     -0.00      0.05 1.00      3977      3479
## In_tuneHHe       -0.03      0.02     -0.06      0.00 1.00      3283      3249
## Sc_tuneHHe       -0.17      0.02     -0.21     -0.13 1.00      4333      3119
## Y_tuneHHe        -0.10      0.02     -0.13     -0.07 1.00      3387      3090
## Be_tuneHHe       -0.14      0.03     -0.19     -0.08 1.00      4509      3154
## Co_tuneHHe       -0.09      0.02     -0.12     -0.06 1.00      3242      3296
## Th_tuneHHe        0.00      0.03     -0.06      0.06 1.00      5398      3520
## Ho1_tuneHHe     -0.06      0.02     -0.10     -0.01 1.00      5037      3492
##
## Family Specific Parameters:
##      Estimate Est.Error 1-95% CI u-95% CI Rhat Bulk_ESS Tail_ESS
## sigma_Std         0.10      0.00      0.09      0.11 1.00      3013      3433
## sigma_Alt         0.12      0.00      0.11      0.13 1.00      3052      3453
## sigma_Ho2         0.12      0.00      0.11      0.13 1.00      2919      3491
## sigma_In          0.14      0.01      0.13      0.15 1.00      3046      3377
## sigma_Sc          0.21      0.01      0.19      0.23 1.00      4066      3239
## sigma_Y           0.15      0.01      0.14      0.16 1.00      3034      3078
## sigma_Be          0.26      0.01      0.24      0.28 1.00      4449      3559
## sigma_Co          0.15      0.01      0.14      0.16 1.00      3020      3219
## sigma_Th          0.28      0.01      0.26      0.31 1.00      3681      3135
## sigma_Ho1         0.22      0.01      0.20      0.24 1.00      4003      3139
##
## Residual Correlations:
##      Estimate Est.Error 1-95% CI u-95% CI Rhat Bulk_ESS Tail_ESS
## rescor(Std,Alt)    0.67      0.03      0.60      0.73 1.00      3403      3434
## rescor(Std,Ho2)    0.59      0.04      0.52      0.66 1.00      3041      3441
## rescor(Alt,Ho2)    0.55      0.04      0.47      0.63 1.00      3628      3353
## rescor(Std,In)     0.52      0.04      0.43      0.59 1.00      3069      2760
## rescor(Alt,In)     0.49      0.04      0.40      0.57 1.00      3159      3190
## rescor(Ho2,In)     0.59      0.04      0.51      0.66 1.00      3582      3074
## rescor(Std,Sc)     0.42      0.05      0.33      0.51 1.00      3373      3310
## rescor(Alt,Sc)     0.40      0.05      0.31      0.49 1.00      3809      3337
## rescor(Ho2,Sc)     0.54      0.04      0.46      0.61 1.00      4236      2825
## rescor(In,Sc)      0.67      0.03      0.60      0.73 1.00      4338      3011
## rescor(Std,Y)      0.51      0.04      0.43      0.59 1.00      2940      3126

```

```

## rescor(Alt,Y)      0.48      0.04      0.40      0.56 1.00      3034      3171
## rescor(Ho2,Y)     0.62      0.03      0.55      0.68 1.00      3767      2785
## rescor(In,Y)      0.93      0.01      0.92      0.95 1.00      4334      3322
## rescor(Sc,Y)      0.84      0.02      0.81      0.87 1.00      4377      3372
## rescor(Std,Be)    0.32      0.05      0.22      0.41 1.00      4023      3056
## rescor(Alt,Be)    0.28      0.05      0.17      0.38 1.00      4556      3750
## rescor(Ho2,Be)    0.36      0.05      0.26      0.45 1.00      4696      3860
## rescor(In,Be)     0.33      0.05      0.23      0.42 1.00      4049      3618
## rescor(Sc,Be)     0.27      0.05      0.17      0.37 1.00      4311      2970
## rescor(Y,Be)      0.34      0.05      0.25      0.43 1.00      4237      3382
## rescor(Std,Co)    0.50      0.04      0.42      0.58 1.00      2808      2975
## rescor(Alt,Co)    0.46      0.04      0.36      0.54 1.00      3320      3110
## rescor(Ho2,Co)    0.59      0.04      0.51      0.65 1.00      3394      3288
## rescor(In,Co)     0.69      0.03      0.63      0.74 1.00      3581      3131
## rescor(Sc,Co)     0.62      0.03      0.55      0.68 1.00      3482      3081
## rescor(Y,Co)      0.74      0.02      0.69      0.79 1.00      3758      3252
## rescor(Be,Co)     0.79      0.02      0.74      0.82 1.00      4696      3876
## rescor(Std,Th)    0.21      0.05      0.10      0.31 1.00      4516      3243
## rescor(Alt,Th)    0.20      0.05      0.10      0.31 1.00      4930      3321
## rescor(Ho2,Th)    0.14      0.05      0.03      0.25 1.00      4286      2953
## rescor(In,Th)     0.55      0.04      0.48      0.63 1.00      4488      3072
## rescor(Sc,Th)     -0.04     0.05     -0.15     0.06 1.00      4120      3400
## rescor(Y,Th)      0.36      0.05      0.26      0.45 1.00      4375      3285
## rescor(Be,Th)     0.54      0.04      0.46      0.62 1.00      4570      3697
## rescor(Co,Th)     0.56      0.04      0.48      0.63 1.00      4716      3438
## rescor(Std,Ho1)   0.29      0.05      0.19      0.39 1.00      4620      3225
## rescor(Alt,Ho1)   0.31      0.05      0.21      0.41 1.00      4997      3293
## rescor(Ho2,Ho1)   0.12      0.05      0.01      0.22 1.00      4212      3302
## rescor(In,Ho1)    0.57      0.04      0.49      0.64 1.00      4490      3418
## rescor(Sc,Ho1)    -0.02     0.05     -0.13     0.08 1.00      4119      3242
## rescor(Y,Ho1)     0.39      0.05      0.30      0.48 1.00      4425      3598
## rescor(Be,Ho1)    0.47      0.04      0.39      0.55 1.00      4246      3540
## rescor(Co,Ho1)    0.54      0.04      0.46      0.61 1.00      4321      3164
## rescor(Th,Ho1)    0.95      0.01      0.94      0.96 1.00      4613      3586
##
## Draws were sampled using sampling(NUTS). For each parameter, Bulk_ESS
## and Tail_ESS are effective sample size measures, and Rhat is the potential
## scale reduction factor on split chains (at convergence, Rhat = 1).

```

The tabular result above is helpful for looking at HMC convergence diagnostics (Rhat, ESS). There were no apparent issues with the HMC estimation procedure. The parameter summaries are also helpful, but it is more efficient to explore their implications graphically, as will be done for the final models below.

## Model checks

Posterior predictive checks are useful for visualizing the extent to which the fitted model generates replicate data that resembles the observed data.

## Density overlay

In the first check, 50 individual draws from the posterior predictive distribution of the fitted model were summarized using a density plot. The individual draws can be thought of as simulations of potential datasets

from a data generating process the model is representing. The density plots of these hypothetical datasets (blue lines) are compared to the density plot for the observed data (black line) to gauge whether the observed data could have reasonably been drawn from the same data generating process.

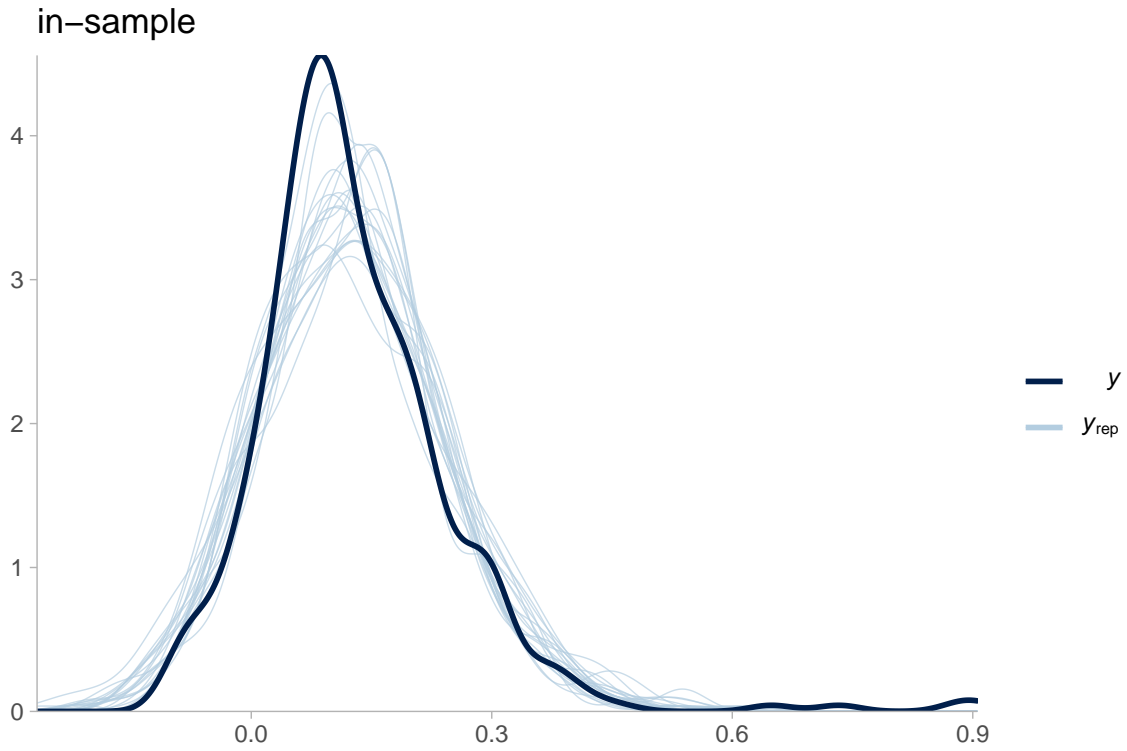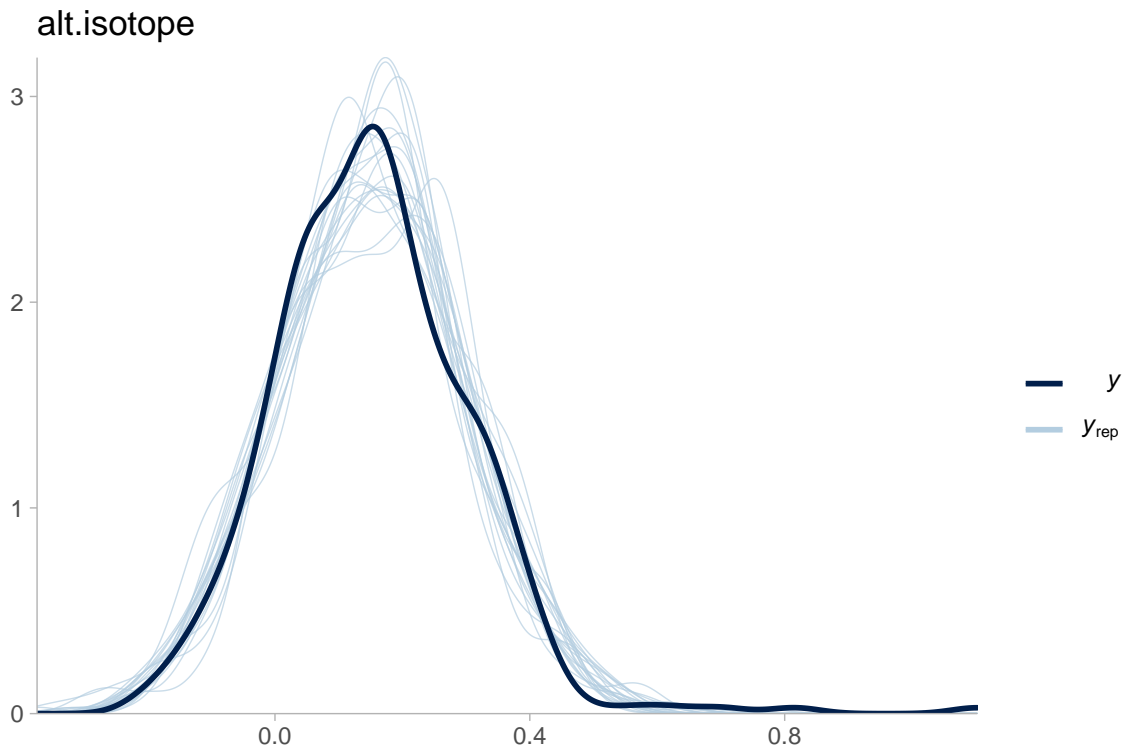

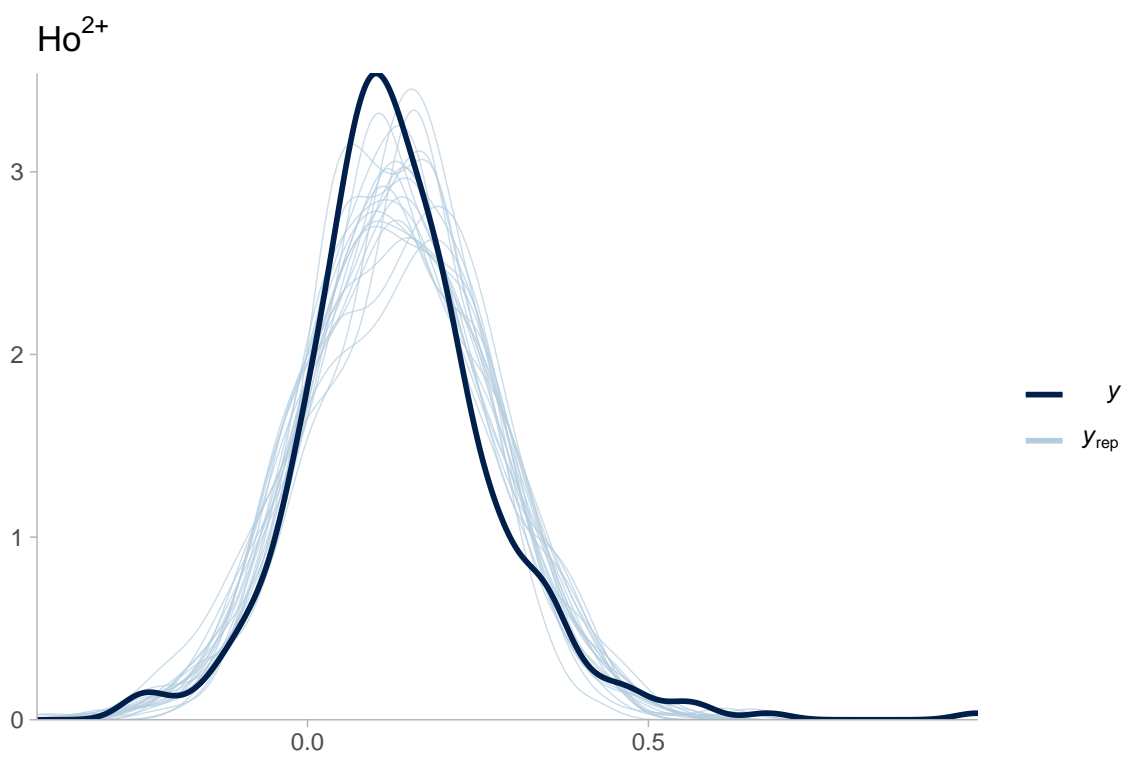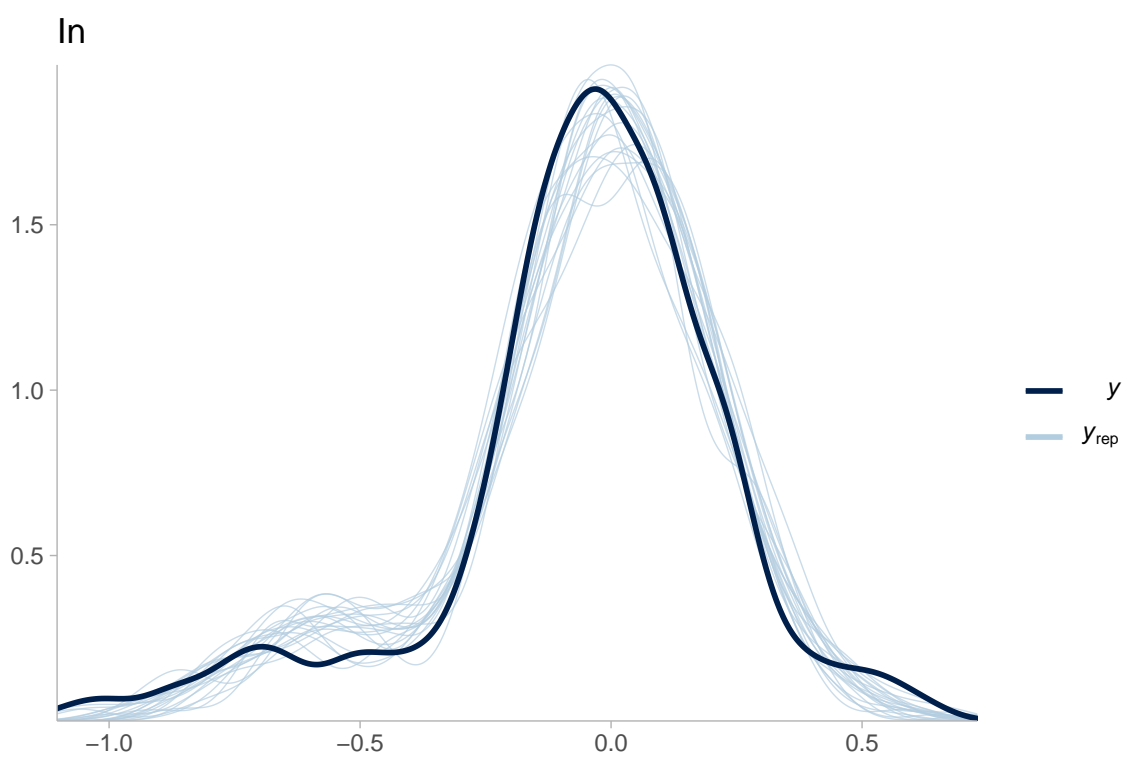



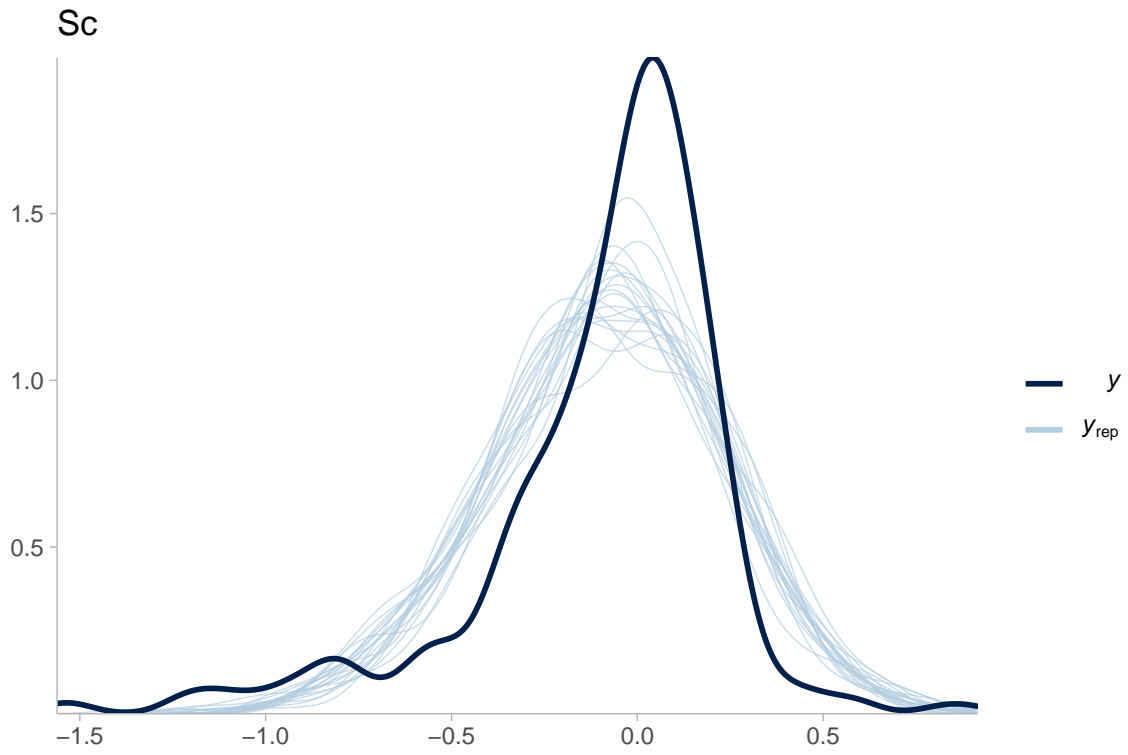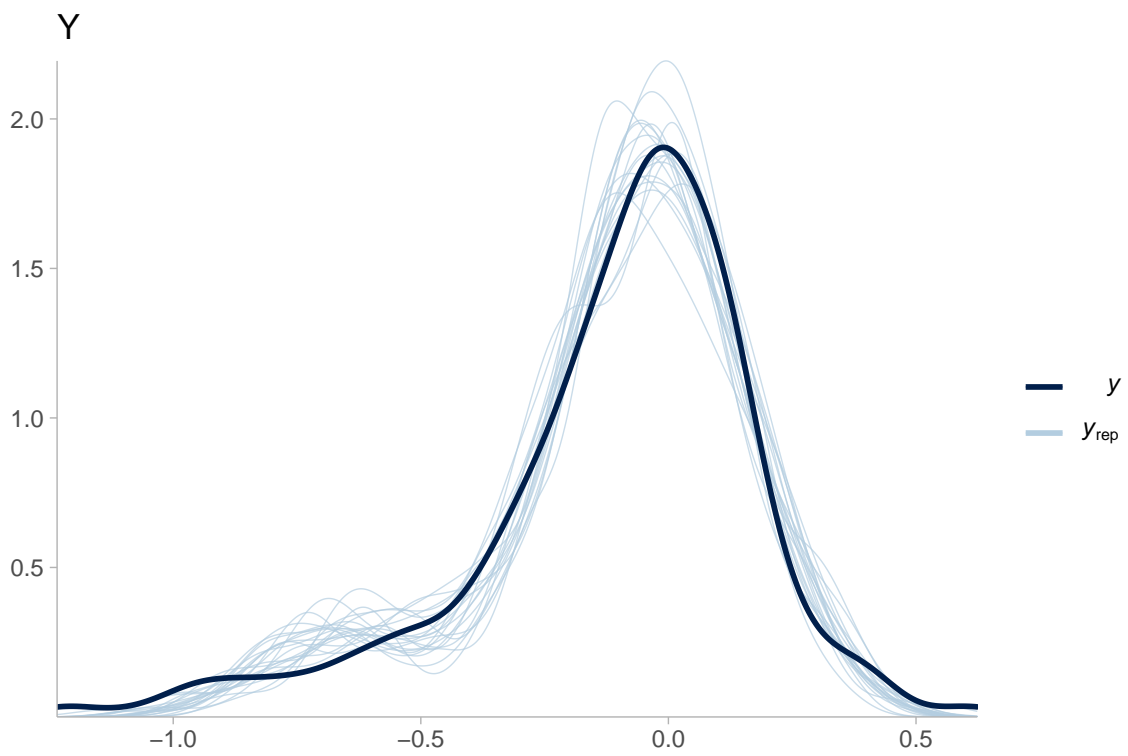

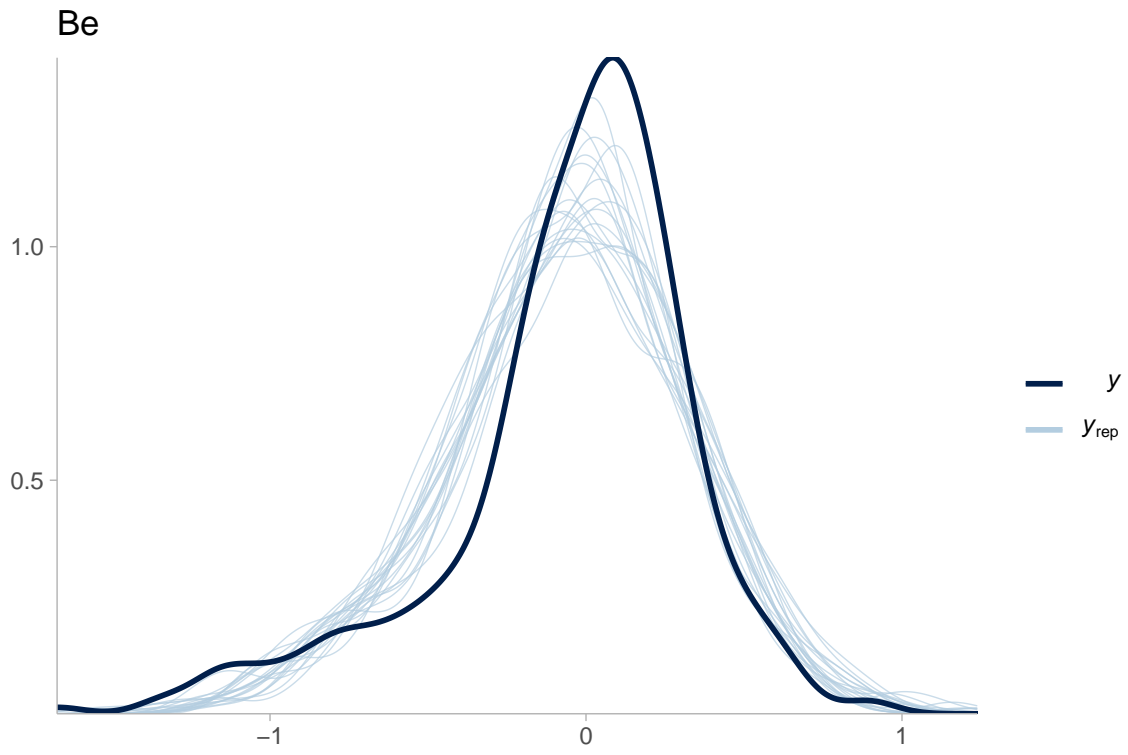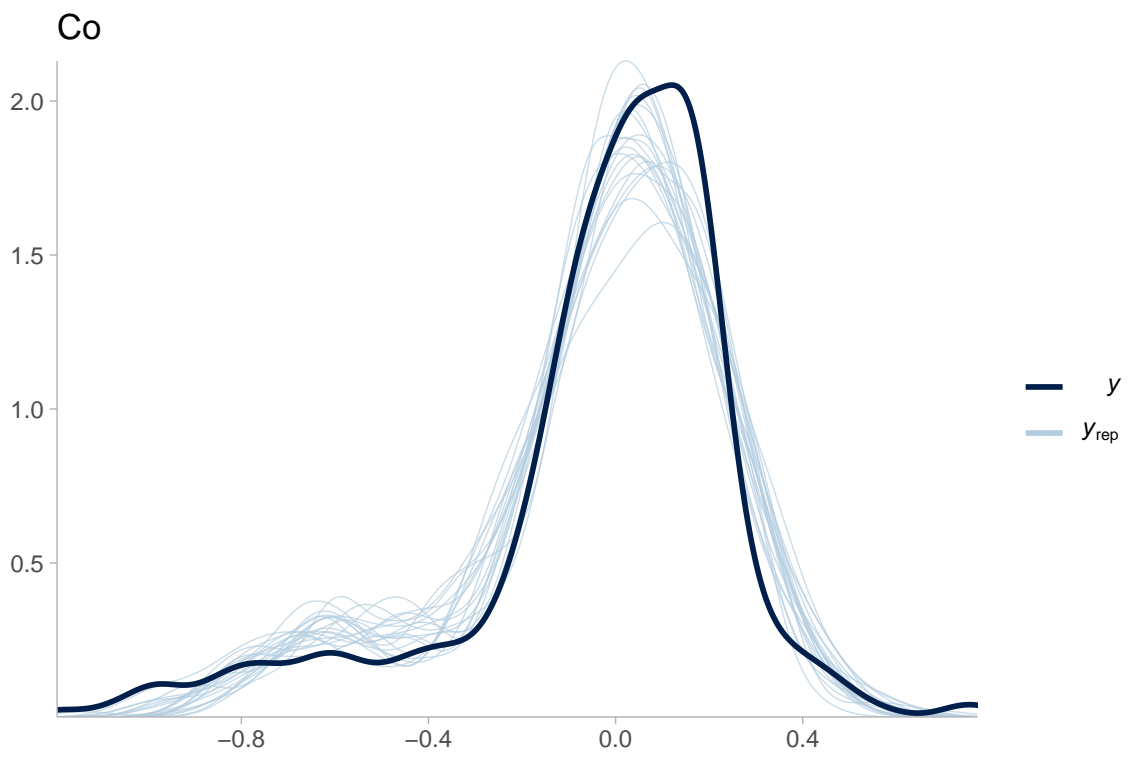

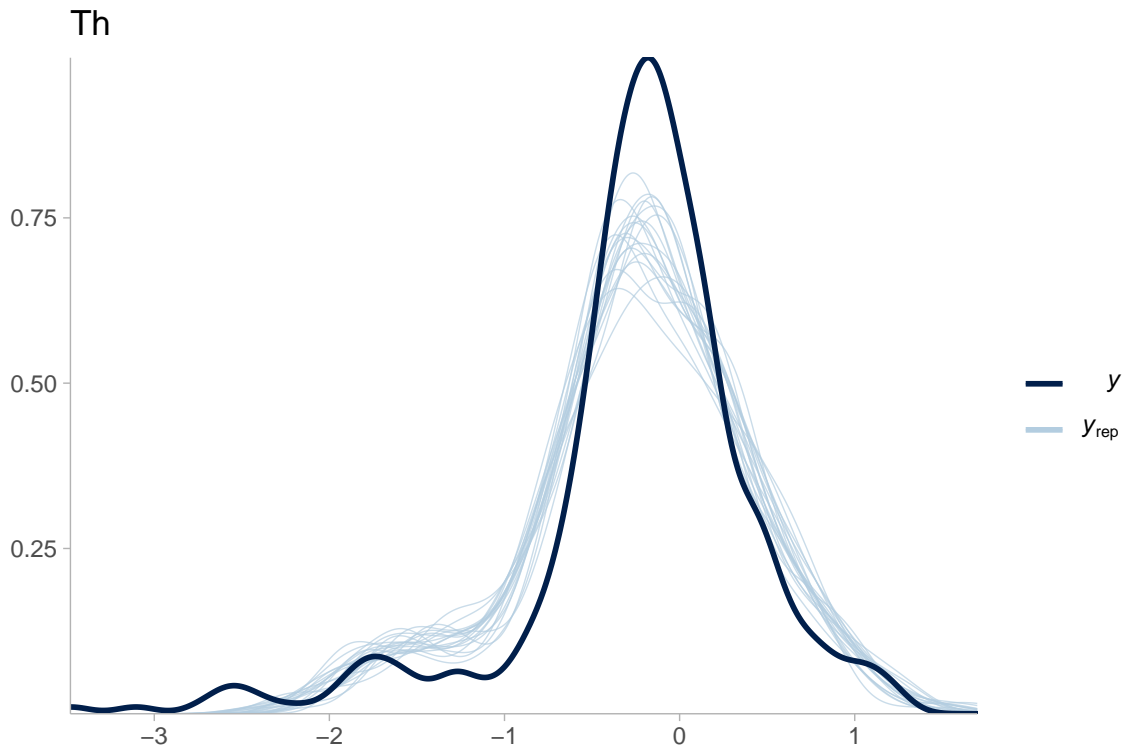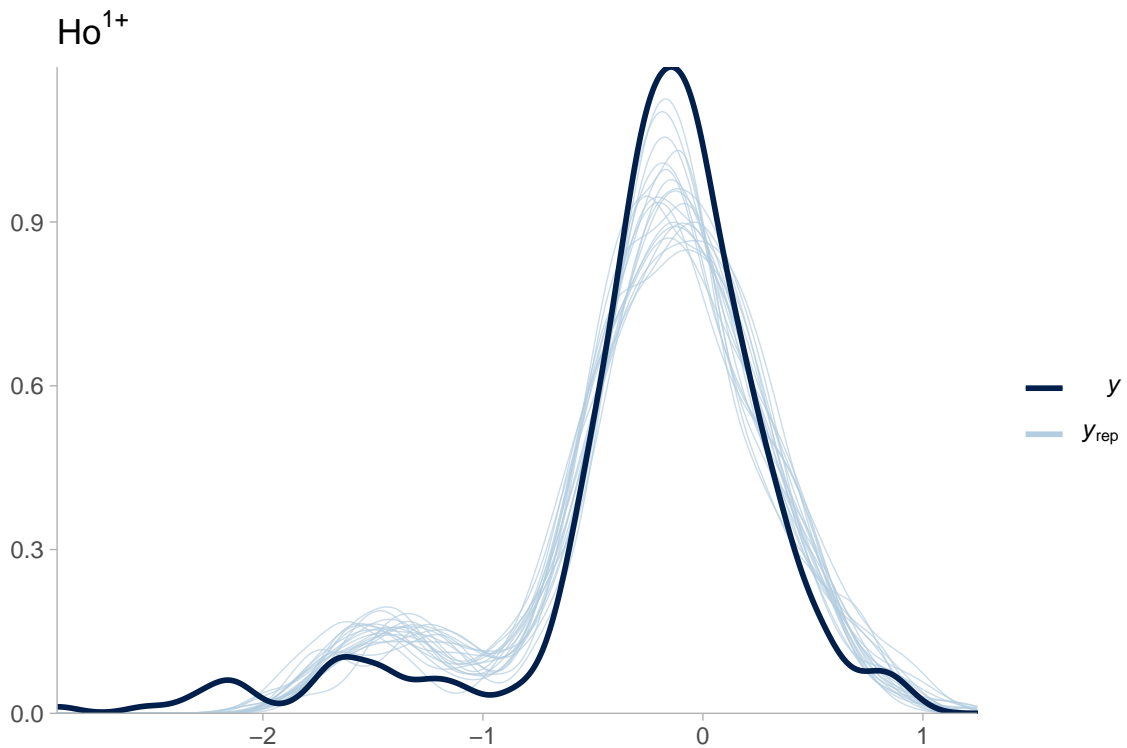

There are several indications from the plots above that the fitted model should be improved. The simulated datasets don't match particularly well to the observed data for most of the methods, except for perhaps the alternative isotope,  $In$ , and  $Y$ . In most cases, it appears that the model predictions are underdispersed relative to the data, indicating that additional structure may be helpful.

No further checks on this model are necessary at this point because it is clear that improvement is needed. However, cross-validation is performed below in order to quantify potential improvements from this initial model moving forward.

## Leave-one-out CV

Below, a Bayesian leave-one-out cross validation (‘LOO-CV’) assessment is conducted using the **loo** package in **R**, which implements fast and stable computations for approximate LOO-CV (and WAIC) (Vehtari, Gelman, and Gabry 2017). These computations estimate pointwise, out-of-sample prediction accuracy from a fitted model by using the log-likelihood evaluated at the posterior simulations of the parameters. The **brms** package automatically calculates the log-likelihood for all relevant models, making it simple to use in conjunction with the **loo** package. For additional information on **loo** and LOO-CV in general, see: <http://mc-stan.org/loo/>.

Pareto-smoothed importance sampling is the method used in **loo** for approximating the true leave-one-out posterior. The model is fit once, the log-likelihood for each data point is saved, and `loo()` utilizes that calculation to re-weight and approximate the leave-one-out posterior. This is convenient because it enables model evaluations via leave-one-out estimates without the need to fit the model  $N$  times. However, the approximation can fail, and the **loo** package provides some diagnostics that indicate when failure is more likely. In particular, each data point is assigned an importance ratio,  $k$ , which indicates how “influential” it may be. As such, too many data points with high (pareto- $k > 0.7$ ) or very high (pareto- $k > 1$ ) influence may indicate problems with the approximation. When there are too many such points, it is generally recommended to re-fit the model with a more traditional leave- $k$ -out method, such as  $k$ -fold. Note that observations with high  $k$  are only problematic in the sense of trying to approximate the leave-one-out posterior, and there isn’t *necessarily* anything inherently wrong with them. However, observations with high  $\hat{k}$  may suggest an oversized influence on the posterior (Gabry et al. 2019).

```
##
## Computed from 4000 by 352 log-likelihood matrix
##
##           Estimate      SE
## elpd_loo   3453.1   79.3
## p_loo      327.9   16.7
## looic      -6906.3 158.5
## -----
## Monte Carlo SE of elpd_loo is NA.
##
## Pareto k diagnostic values:
##           Count Pct.    Min. n_eff
## (-Inf, 0.5] (good)    300  85.2%   460
## (0.5, 0.7]  (ok)      44  12.5%    87
## (0.7, 1]    (bad)       7   2.0%    15
## (1, Inf)    (very bad)  1   0.3%    28
## See help('pareto-k-diagnostic') for details.
```

The **loo** calculation resulted in 8 potentially “problematic” observations (i.e., Pareto  $k > 0.7$ ). The next step is to refit the model 8 times in order to compute the exact cross validation for each of the 8 problematic observations (“reloo”). If the “reloo” pareto- $k$  are all less than 0.7, then those 8 calculations can be substituted for computing the pointwise contributions to total  $elpd_{loo}$ . Otherwise, a  $k$ -fold or similar method should be used to compute a true leave- $k$ -out posterior density.

With regard to the other outputs from the `summary(loo)` call, reference: <https://mc-stan.org/loo/reference/loo-glossary.html>. In short, the  $elpd_{loo}$  is a way to compare models. For each observation, a calculation of how “surprised” the model is to see the left-out data point is made based on the predictive density at the

observed value. The  $elpd_{loo}$  is a sum of these individual contributions. The  $p_{loo}$ , by comparison, is the difference between the  $elpd_{loo}$  and the non-CV log posterior predictive density, and may be interpreted as the effective number of parameters. The  $looic$ , finally, is just  $-2^{elpd_{loo}}$  to provide output on the conventional scale of “deviance” or AIC.

The pareto-k can be plotted to get an indication of which specific observations are problematic and may have outsized influence.

### PSIS diagnostic plot

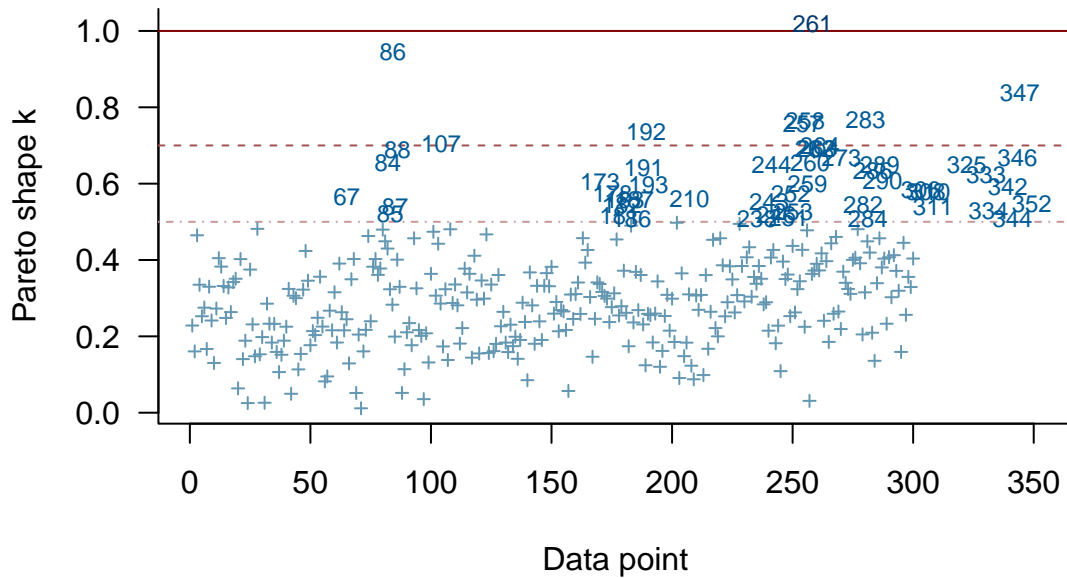

```
load("full-analysis-files/loo_1.rda")
load("full-analysis-files/df_mv_as.rda")
df_mv_as[which(loo_1$diagnostics$pareto_k > 0.7), ] %>% print()
```

```
## # A tibble: 8 x 14
##   ider      matrix day_expt tune      Alt      Ho2      In      Std      Sc      Y
##   <chr>    <fct> <fct> <fct> <dbl> <dbl> <dbl> <dbl> <dbl> <dbl>
## 1 HC1330LHe HCl    330   LHe    0.0385 0.142 -1.10  0.0848 -0.143 -0.833
## 2 S04510LHe S04    510   LHe    1.10   0.982 0.555  0.906  0.894  0.624
## 3 Mg316HHe  Mg     316   HHe   -0.0198 0.399 0.549  0.0373 0.0796 0.363
## 4 Na330HHe  Na     330   HHe    0.0002 0.122 -0.657 0.0799 -1.17  -0.944
## 5 Mg330HHe  Mg     330   HHe   -0.195 -0.0796 -0.877 -0.0838 -1.56  -1.20
## 6 S04330HHe S04    330   HHe    0.239  0.420 -0.905 0.349  0.181 -0.741
## 7 S04510HHe S04    510   HHe    0.816  0.576 0.382  0.884  0.598  0.424
## 8 K516HHe   K      516   HHe   -0.0162 -0.0628 0.266  0.0535 -1.06  -0.259
## # ... with 4 more variables: Be <dbl>, Co <dbl>, Th <dbl>, Ho1 <dbl>
```

All of the potentially problematic observations look to be associated with the 250ppm matrices and half of them on from 3/30, the date of the cone change.

In any case, a re-*loo* for these 8 observations is needed calculate the  $elpd_{loo}$ .

```
##
## Computed from 4000 by 352 log-likelihood matrix
##
##           Estimate      SE
## elpd_loo   3452.0  79.6
## p_loo       329.0  17.1
## looic      -6904.0 159.2
## -----
## Monte Carlo SE of elpd_loo is 0.7.
##
## Pareto k diagnostic values:
##           Count Pct.   Min. n_eff
## (-Inf, 0.5] (good)   308  87.5%   15
## (0.5, 0.7] (ok)     44  12.5%   87
## (0.7, 1] (bad)      0   0.0%  <NA>
## (1, Inf) (very bad) 0   0.0%  <NA>
##
## All Pareto k estimates are ok (k < 0.7).
## See help('pareto-k-diagnostic') for details.
```

The relloo eliminated concerns with the potentially problematic observations with regard to the  $elpd_{loo}$ . This information can be used to compare this model with others to follow.

## A more flexible arsenic model

For the next model, the  $\sigma$  term is also assigned a linear predictor. This is often referred to as a distributional model or a model for heterogeneous variances. From the exploratory plots above, this seemed like a reasonable next step, given apparent heterogeneity of variances for some methods across matrices, tunes, and days. In this model,  $\sigma$  is allowed to vary in a similar manner as  $\mu$ . That is,  $\sigma$  is modeled as a linear function of a fixed tune effect and varying effects for matrix and day of the experiment. For more information on fitting distributional models in **brms** see (Bürkner 2017) and: [https://cran.r-project.org/web/packages/brms/vignettes/brms\\_distreg.html](https://cran.r-project.org/web/packages/brms/vignettes/brms_distreg.html)

```
load("full-analysis-files/df_mv_as.rda")

bf_Std <- bf(Std ~ tune + (1 | matrix) + (1 | day_expt),
            sigma ~ tune + (1 | matrix) + (1 | day_expt),
            family = gaussian())

bf_Alt <- bf(Alt ~ tune + (1 | matrix) + (1 | day_expt),
            sigma ~ tune + (1 | matrix) + (1 | day_expt),
            family = gaussian())

bf_Ho2 <- bf(Ho2 ~ tune + (1 | matrix) + (1 | day_expt),
            sigma ~ tune + (1 | matrix) + (1 | day_expt),
            family = gaussian())

bf_In <- bf(In ~ tune + (1 | matrix) + (1 | day_expt),
            sigma ~ tune + (1 | matrix) + (1 | day_expt),
            family = gaussian())

bf_Sc <- bf(Sc ~ tune + (1 | matrix) + (1 | day_expt),
```

```

sigma ~ tune + (1 | matrix) + (1 | day_expt),
family = gaussian()

bf_Y <- bf(Y ~ tune + (1 | matrix) + (1 | day_expt),
sigma ~ tune + (1 | matrix) + (1 | day_expt),
family = gaussian())

bf_Be <- bf(Be ~ tune + (1 | matrix) + (1 | day_expt),
sigma ~ tune + (1 | matrix) + (1 | day_expt),
family = gaussian())

bf_Co <- bf(Co ~ tune + (1 | matrix) + (1 | day_expt),
sigma ~ tune + (1 | matrix) + (1 | day_expt),
family = gaussian())

bf_Th <- bf(Th ~ tune + (1 | matrix) + (1 | day_expt),
sigma ~ tune + (1 | matrix) + (1 | day_expt),
family = gaussian())

bf_Ho1 <- bf(Ho1 ~ tune + (1 | matrix) + (1 | day_expt),
sigma ~ tune + (1 | matrix) + (1 | day_expt),
family = gaussian())

mod2 <- brm(bf_Std +
bf_Alt +
bf_Ho2 +
bf_In +
bf_Sc +
bf_Y +
bf_Be +
bf_Co +
bf_Th +
bf_Ho1 +
set_rescor(TRUE),
data = df_mv_as,
prior = c(prior(normal(0, 1), class = "Intercept", resp = "Std"),
prior(normal(0, 1), class = "Intercept", resp = "Alt"),
prior(normal(0, 1), class = "Intercept", resp = "Ho2"),
prior(normal(0, 1), class = "Intercept", resp = "In"),
prior(normal(0, 1), class = "Intercept", resp = "Sc"),
prior(normal(0, 1), class = "Intercept", resp = "Y"),
prior(normal(0, 1), class = "Intercept", resp = "Be"),
prior(normal(0, 1), class = "Intercept", resp = "Co"),
prior(normal(0, 1), class = "Intercept", resp = "Th"),
prior(normal(0, 1), class = "Intercept", resp = "Ho1"),

prior(normal(0, 1), class = "b", resp = "Std"),
prior(normal(0, 1), class = "b", resp = "Alt"),
prior(normal(0, 1), class = "b", resp = "Ho2"),
prior(normal(0, 1), class = "b", resp = "In"),
prior(normal(0, 1), class = "b", resp = "Sc"),
prior(normal(0, 1), class = "b", resp = "Y"),
prior(normal(0, 1), class = "b", resp = "Be"),

```

```

prior(normal(0, 1), class = "b", resp = "Co"),
prior(normal(0, 1), class = "b", resp = "Th"),
prior(normal(0, 1), class = "b", resp = "Ho1"),

prior(normal(0, 1), class = "sd", resp = "Std"),
prior(normal(0, 1), class = "sd", resp = "Alt"),
prior(normal(0, 1), class = "sd", resp = "Ho2"),
prior(normal(0, 1), class = "sd", resp = "In"),
prior(normal(0, 1), class = "sd", resp = "Sc"),
prior(normal(0, 1), class = "sd", resp = "Y"),
prior(normal(0, 1), class = "sd", resp = "Be"),
prior(normal(0, 1), class = "sd", resp = "Co"),
prior(normal(0, 1), class = "sd", resp = "Th"),
prior(normal(0, 1), class = "sd", resp = "Ho1"),

prior(normal(-1, 2), class = "Intercept", dpar = "sigma", resp = "Std"),
prior(normal(-1, 2), class = "Intercept", dpar = "sigma", resp = "Alt"),
prior(normal(-1, 2), class = "Intercept", dpar = "sigma", resp = "Ho2"),
prior(normal(-1, 2), class = "Intercept", dpar = "sigma", resp = "In"),
prior(normal(-1, 2), class = "Intercept", dpar = "sigma", resp = "Sc"),
prior(normal(-1, 2), class = "Intercept", dpar = "sigma", resp = "Y"),
prior(normal(-1, 2), class = "Intercept", dpar = "sigma", resp = "Be"),
prior(normal(-1, 2), class = "Intercept", dpar = "sigma", resp = "Co"),
prior(normal(-1, 2), class = "Intercept", dpar = "sigma", resp = "Th"),
prior(normal(-1, 2), class = "Intercept", dpar = "sigma", resp = "Ho1"),

prior(normal(0, 1), class = "b", dpar = "sigma", resp = "Std"),
prior(normal(0, 1), class = "b", dpar = "sigma", resp = "Alt"),
prior(normal(0, 1), class = "b", dpar = "sigma", resp = "Ho2"),
prior(normal(0, 1), class = "b", dpar = "sigma", resp = "In"),
prior(normal(0, 1), class = "b", dpar = "sigma", resp = "Sc"),
prior(normal(0, 1), class = "b", dpar = "sigma", resp = "Y"),
prior(normal(0, 1), class = "b", dpar = "sigma", resp = "Be"),
prior(normal(0, 1), class = "b", dpar = "sigma", resp = "Co"),
prior(normal(0, 1), class = "b", dpar = "sigma", resp = "Th"),
prior(normal(0, 1), class = "b", dpar = "sigma", resp = "Ho1"),

prior(normal(0, 1), class = "sd", dpar = "sigma", resp = "Std"),
prior(normal(0, 1), class = "sd", dpar = "sigma", resp = "Alt"),
prior(normal(0, 1), class = "sd", dpar = "sigma", resp = "Ho2"),
prior(normal(0, 1), class = "sd", dpar = "sigma", resp = "In"),
prior(normal(0, 1), class = "sd", dpar = "sigma", resp = "Sc"),
prior(normal(0, 1), class = "sd", dpar = "sigma", resp = "Y"),
prior(normal(0, 1), class = "sd", dpar = "sigma", resp = "Be"),
prior(normal(0, 1), class = "sd", dpar = "sigma", resp = "Co"),
prior(normal(0, 1), class = "sd", dpar = "sigma", resp = "Th"),
prior(normal(0, 1), class = "sd", dpar = "sigma", resp = "Ho1")#,

prior(lkj(1), class = "rescor")
),
control = list(adapt_delta = 0.95, max_treedepth = 14),
init_r = 0.05,
save_pars = save_pars(all = TRUE),

```



```

seed = 65112,
chains=4,
iter=3000,
cores=4 )

save(mod2, file = "full-analysis-files/mod2_As_mv.rda")

```

## Tabular parameter estimates

Again, a summary of the posterior estimates.

```

## Family: MV(gaussian, gaussian, gaussian, gaussian, gaussian, gaussian, gaussian, gaussian, gaussian)
## Links: mu = identity; sigma = log
## Formula: Std ~ tune + (1 | matrix) + (1 | day_expt)
## sigma ~ tune + (1 | matrix) + (1 | day_expt)
## Alt ~ tune + (1 | matrix) + (1 | day_expt)
## sigma ~ tune + (1 | matrix) + (1 | day_expt)
## Ho2 ~ tune + (1 | matrix) + (1 | day_expt)
## sigma ~ tune + (1 | matrix) + (1 | day_expt)
## In ~ tune + (1 | matrix) + (1 | day_expt)
## sigma ~ tune + (1 | matrix) + (1 | day_expt)
## Sc ~ tune + (1 | matrix) + (1 | day_expt)
## sigma ~ tune + (1 | matrix) + (1 | day_expt)
## Y ~ tune + (1 | matrix) + (1 | day_expt)
## sigma ~ tune + (1 | matrix) + (1 | day_expt)
## Be ~ tune + (1 | matrix) + (1 | day_expt)
## sigma ~ tune + (1 | matrix) + (1 | day_expt)
## Co ~ tune + (1 | matrix) + (1 | day_expt)
## sigma ~ tune + (1 | matrix) + (1 | day_expt)
## Th ~ tune + (1 | matrix) + (1 | day_expt)
## sigma ~ tune + (1 | matrix) + (1 | day_expt)
## Ho1 ~ tune + (1 | matrix) + (1 | day_expt)
## sigma ~ tune + (1 | matrix) + (1 | day_expt)
## Data: df_mv_as (Number of observations: 352)
## Draws: 4 chains, each with iter = 3000; warmup = 1500; thin = 1;
## total post-warmup draws = 6000
##
## Priors:
## b_Alt ~ normal(0, 1)
## b_Alt_sigma ~ normal(0, 1)
## b_Be ~ normal(0, 1)
## b_Be_sigma ~ normal(0, 1)
## b_Co ~ normal(0, 1)

```

```

## b_Co_sigma ~ normal(0, 1)
## b_Ho1 ~ normal(0, 1)
## b_Ho1_sigma ~ normal(0, 1)
## b_Ho2 ~ normal(0, 1)
## b_Ho2_sigma ~ normal(0, 1)
## b_In ~ normal(0, 1)
## b_In_sigma ~ normal(0, 1)
## b_Sc ~ normal(0, 1)
## b_Sc_sigma ~ normal(0, 1)
## b_Std ~ normal(0, 1)
## b_Std_sigma ~ normal(0, 1)
## b_Th ~ normal(0, 1)
## b_Th_sigma ~ normal(0, 1)
## b_Y ~ normal(0, 1)
## b_Y_sigma ~ normal(0, 1)
## Intercept_Alt ~ normal(0, 1)
## Intercept_Alt_sigma ~ normal(-1, 2)
## Intercept_Be ~ normal(0, 1)
## Intercept_Be_sigma ~ normal(-1, 2)
## Intercept_Co ~ normal(0, 1)
## Intercept_Co_sigma ~ normal(-1, 2)
## Intercept_Ho1 ~ normal(0, 1)
## Intercept_Ho1_sigma ~ normal(-1, 2)
## Intercept_Ho2 ~ normal(0, 1)
## Intercept_Ho2_sigma ~ normal(-1, 2)
## Intercept_In ~ normal(0, 1)
## Intercept_In_sigma ~ normal(-1, 2)
## Intercept_Sc ~ normal(0, 1)
## Intercept_Sc_sigma ~ normal(-1, 2)
## Intercept_Std ~ normal(0, 1)
## Intercept_Std_sigma ~ normal(-1, 2)
## Intercept_Th ~ normal(0, 1)
## Intercept_Th_sigma ~ normal(-1, 2)
## Intercept_Y ~ normal(0, 1)
## Intercept_Y_sigma ~ normal(-1, 2)
## Lrescor ~ lkj_corr_cholesky(1)
## sd_Alt ~ normal(0, 1)
## sd_Alt_sigma ~ normal(0, 1)
## sd_Be ~ normal(0, 1)
## sd_Be_sigma ~ normal(0, 1)
## sd_Co ~ normal(0, 1)
## sd_Co_sigma ~ normal(0, 1)
## sd_Ho1 ~ normal(0, 1)
## sd_Ho1_sigma ~ normal(0, 1)
## sd_Ho2 ~ normal(0, 1)
## sd_Ho2_sigma ~ normal(0, 1)
## sd_In ~ normal(0, 1)
## sd_In_sigma ~ normal(0, 1)
## sd_Sc ~ normal(0, 1)
## sd_Sc_sigma ~ normal(0, 1)
## sd_Std ~ normal(0, 1)
## sd_Std_sigma ~ normal(0, 1)
## sd_Th ~ normal(0, 1)
## sd_Th_sigma ~ normal(0, 1)

```

```

## sd_Y ~ normal(0, 1)
## sd_Y_sigma ~ normal(0, 1)
##
## Group-Level Effects:
## ~day_expt (Number of levels: 8)
##
##           Estimate Est.Error 1-95% CI u-95% CI Rhat Bulk_ESS
## sd(Std_Intercept)      0.06    0.02   0.03   0.11 1.00   3615
## sd(sigma_Std_Intercept) 0.27    0.11   0.13   0.53 1.00   2765
## sd(Alt_Intercept)      0.11    0.04   0.06   0.21 1.00   3503
## sd(sigma_Alt_Intercept) 0.30    0.11   0.15   0.57 1.00   3511
## sd(Ho2_Intercept)      0.04    0.02   0.02   0.08 1.00   2503
## sd(sigma_Ho2_Intercept) 0.37    0.14   0.20   0.72 1.00   3580
## sd(In_Intercept)       0.28    0.10   0.16   0.54 1.00   4809
## sd(sigma_In_Intercept)  0.35    0.12   0.19   0.64 1.00   5012
## sd(Sc_Intercept)       0.17    0.06   0.09   0.34 1.00   4209
## sd(sigma_Sc_Intercept)  0.36    0.13   0.19   0.69 1.00   3751
## sd(Y_Intercept)        0.26    0.09   0.14   0.48 1.00   5100
## sd(sigma_Y_Intercept)   0.38    0.13   0.21   0.72 1.00   5461
## sd(Be_Intercept)       0.27    0.09   0.15   0.51 1.00   5045
## sd(sigma_Be_Intercept)  0.43    0.15   0.23   0.80 1.00   4138
## sd(Co_Intercept)       0.24    0.09   0.13   0.45 1.00   3982
## sd(sigma_Co_Intercept)  0.47    0.16   0.27   0.89 1.00   5742
## sd(Th_Intercept)       0.55    0.17   0.32   0.97 1.00   5602
## sd(sigma_Th_Intercept)  0.54    0.18   0.31   1.00 1.00   5673
## sd(Ho1_Intercept)      0.53    0.17   0.31   0.96 1.00   5675
## sd(sigma_Ho1_Intercept) 0.55    0.18   0.31   0.98 1.00   4744
##
##           Tail_ESS
## sd(Std_Intercept)      4466
## sd(sigma_Std_Intercept) 4412
## sd(Alt_Intercept)      3864
## sd(sigma_Alt_Intercept) 4680
## sd(Ho2_Intercept)      3415
## sd(sigma_Ho2_Intercept) 4494
## sd(In_Intercept)       4057
## sd(sigma_In_Intercept) 4390
## sd(Sc_Intercept)       3799
## sd(sigma_Sc_Intercept) 3806
## sd(Y_Intercept)        4706
## sd(sigma_Y_Intercept)   3757
## sd(Be_Intercept)       4557
## sd(sigma_Be_Intercept) 4482
## sd(Co_Intercept)       4211
## sd(sigma_Co_Intercept) 4732
## sd(Th_Intercept)       4141
## sd(sigma_Th_Intercept) 4427
## sd(Ho1_Intercept)      4022
## sd(sigma_Ho1_Intercept) 3706
##
## ~matrix (Number of levels: 22)
##
##           Estimate Est.Error 1-95% CI u-95% CI Rhat Bulk_ESS
## sd(Std_Intercept)      0.05    0.01   0.04   0.08 1.00   1813
## sd(sigma_Std_Intercept) 0.10    0.05   0.01   0.19 1.00   2181
## sd(Alt_Intercept)      0.05    0.01   0.04   0.08 1.01   1921
## sd(sigma_Alt_Intercept) 0.07    0.04   0.00   0.16 1.00   2551

```

```

## sd(Ho2_Intercept)      0.07      0.01      0.05      0.09 1.00      2862
## sd(sigma_Ho2_Intercept) 0.07      0.04      0.00      0.17 1.00      2286
## sd(In_Intercept)      0.10      0.02      0.07      0.14 1.00      3518
## sd(sigma_In_Intercept) 0.06      0.03      0.01      0.12 1.01       894
## sd(Sc_Intercept)      0.09      0.02      0.06      0.13 1.00      3309
## sd(sigma_Sc_Intercept) 0.19      0.05      0.12      0.30 1.01      1163
## sd(Y_Intercept)       0.07      0.01      0.05      0.09 1.00      3371
## sd(sigma_Y_Intercept)  0.06      0.03      0.01      0.13 1.02       505
## sd(Be_Intercept)      0.09      0.02      0.06      0.12 1.00      3481
## sd(sigma_Be_Intercept) 0.12      0.05      0.03      0.21 1.00      1284
## sd(Co_Intercept)      0.04      0.01      0.03      0.06 1.00      2664
## sd(sigma_Co_Intercept) 0.08      0.03      0.02      0.15 1.00       694
## sd(Th_Intercept)      0.28      0.05      0.21      0.40 1.00      3082
## sd(sigma_Th_Intercept) 0.04      0.02      0.00      0.09 1.00      1204
## sd(Ho1_Intercept)     0.20      0.03      0.15      0.28 1.00      2981
## sd(sigma_Ho1_Intercept) 0.03      0.02      0.00      0.06 1.00      2258
##                               Tail_ESS
## sd(Std_Intercept)      2752
## sd(sigma_Std_Intercept) 2191
## sd(Alt_Intercept)      3385
## sd(sigma_Alt_Intercept) 2997
## sd(Ho2_Intercept)      3404
## sd(sigma_Ho2_Intercept) 3157
## sd(In_Intercept)       4200
## sd(sigma_In_Intercept) 1448
## sd(Sc_Intercept)       3995
## sd(sigma_Sc_Intercept) 3376
## sd(Y_Intercept)        3575
## sd(sigma_Y_Intercept)  1730
## sd(Be_Intercept)       4420
## sd(sigma_Be_Intercept) 1874
## sd(Co_Intercept)       4029
## sd(sigma_Co_Intercept) 1106
## sd(Th_Intercept)       4260
## sd(sigma_Th_Intercept) 2592
## sd(Ho1_Intercept)      3655
## sd(sigma_Ho1_Intercept) 3281
##
## Population-Level Effects:
##                               Estimate Est.Error 1-95% CI u-95% CI Rhat Bulk_ESS Tail_ESS
## Std_Intercept                0.11      0.03      0.06      0.17 1.00      3033      3538
## sigma_Std_Intercept          -2.54      0.11     -2.77     -2.32 1.00      4052      3879
## Alt_Intercept                 0.15      0.04      0.06      0.23 1.00      3174      3724
## sigma_Alt_Intercept          -2.35      0.13     -2.59     -2.09 1.00      4087      4131
## Ho2_Intercept                 0.11      0.02      0.07      0.16 1.00      3036      3628
## sigma_Ho2_Intercept          -2.53      0.15     -2.83     -2.23 1.00      3808      4110
## In_Intercept                 -0.04      0.11     -0.26      0.16 1.00      2489      3302
## sigma_In_Intercept           -2.36      0.14     -2.64     -2.08 1.00      3332      4004
## Sc_Intercept                 -0.01      0.07     -0.15      0.13 1.00      2618      3312
## sigma_Sc_Intercept           -2.23      0.15     -2.52     -1.93 1.00      3661      4013
## Y_Intercept                  -0.06      0.09     -0.25      0.13 1.00      2566      3332
## sigma_Y_Intercept            -2.38      0.15     -2.67     -2.07 1.00      2858      2805
## Be_Intercept                  0.00      0.10     -0.20      0.20 1.00      2913      3808
## sigma_Be_Intercept           -1.96      0.17     -2.30     -1.62 1.00      3292      3494

```

|                        |       |      |       |       |      |      |      |
|------------------------|-------|------|-------|-------|------|------|------|
| ## Co_Intercept        | 0.01  | 0.09 | -0.18 | 0.19  | 1.00 | 2588 | 3070 |
| ## sigma_Co_Intercept  | -2.30 | 0.18 | -2.66 | -1.92 | 1.00 | 2990 | 3307 |
| ## Th_Intercept        | -0.22 | 0.20 | -0.62 | 0.21  | 1.00 | 2863 | 3481 |
| ## sigma_Th_Intercept  | -1.81 | 0.21 | -2.25 | -1.38 | 1.00 | 2904 | 3629 |
| ## Ho1_Intercept       | -0.20 | 0.19 | -0.59 | 0.20  | 1.00 | 2244 | 2965 |
| ## sigma_Ho1_Intercept | -2.04 | 0.21 | -2.46 | -1.61 | 1.00 | 3056 | 3598 |
| ## Std_tuneHHe         | 0.06  | 0.01 | 0.03  | 0.08  | 1.01 | 907  | 1508 |
| ## sigma_Std_tuneHHe   | 0.33  | 0.07 | 0.19  | 0.46  | 1.00 | 8229 | 5182 |
| ## Alt_tuneHHe         | 0.05  | 0.02 | 0.01  | 0.08  | 1.01 | 886  | 1479 |
| ## sigma_Alt_tuneHHe   | 0.33  | 0.08 | 0.18  | 0.49  | 1.00 | 7624 | 4970 |
| ## Ho2_tuneHHe         | 0.08  | 0.01 | 0.05  | 0.11  | 1.01 | 891  | 1595 |
| ## sigma_Ho2_tuneHHe   | 0.62  | 0.07 | 0.47  | 0.76  | 1.00 | 5943 | 4605 |
| ## In_tuneHHe          | 0.07  | 0.03 | 0.01  | 0.11  | 1.01 | 647  | 971  |
| ## sigma_In_tuneHHe    | 0.79  | 0.05 | 0.70  | 0.89  | 1.00 | 4889 | 5044 |
| ## Sc_tuneHHe          | -0.02 | 0.03 | -0.08 | 0.03  | 1.01 | 725  | 1601 |
| ## sigma_Sc_tuneHHe    | 0.92  | 0.06 | 0.80  | 1.03  | 1.00 | 6327 | 5232 |
| ## Y_tuneHHe           | 0.01  | 0.03 | -0.05 | 0.06  | 1.01 | 617  | 1013 |
| ## sigma_Y_tuneHHe     | 0.90  | 0.05 | 0.81  | 0.99  | 1.00 | 5098 | 4938 |
| ## Be_tuneHHe          | 0.08  | 0.04 | -0.02 | 0.15  | 1.01 | 787  | 1208 |
| ## sigma_Be_tuneHHe    | 1.02  | 0.06 | 0.90  | 1.14  | 1.00 | 6620 | 4862 |
| ## Co_tuneHHe          | 0.05  | 0.03 | -0.01 | 0.10  | 1.01 | 615  | 935  |
| ## sigma_Co_tuneHHe    | 0.86  | 0.04 | 0.77  | 0.95  | 1.00 | 5689 | 4523 |
| ## Th_tuneHHe          | 0.12  | 0.05 | 0.01  | 0.21  | 1.01 | 774  | 1181 |
| ## sigma_Th_tuneHHe    | 0.87  | 0.06 | 0.74  | 0.98  | 1.00 | 5701 | 5192 |
| ## Ho1_tuneHHe         | 0.09  | 0.04 | -0.01 | 0.15  | 1.01 | 715  | 1003 |
| ## sigma_Ho1_tuneHHe   | 0.90  | 0.05 | 0.80  | 1.01  | 1.00 | 5444 | 4524 |

##

## Residual Correlations:

| ##                 | Estimate | Est.Error | l-95% CI | u-95% CI | Rhat | Bulk_ESS | Tail_ESS |
|--------------------|----------|-----------|----------|----------|------|----------|----------|
| ## rescor(Std,Alt) | 0.69     | 0.03      | 0.63     | 0.75     | 1.00 | 4174     | 4478     |
| ## rescor(Std,Ho2) | 0.65     | 0.03      | 0.58     | 0.71     | 1.00 | 4107     | 5092     |
| ## rescor(Alt,Ho2) | 0.62     | 0.04      | 0.54     | 0.69     | 1.00 | 4736     | 5105     |
| ## rescor(Std,In)  | 0.61     | 0.04      | 0.53     | 0.68     | 1.00 | 3053     | 4368     |
| ## rescor(Alt,In)  | 0.60     | 0.04      | 0.52     | 0.67     | 1.00 | 3180     | 3792     |
| ## rescor(Ho2,In)  | 0.65     | 0.04      | 0.58     | 0.72     | 1.00 | 3409     | 4163     |
| ## rescor(Std,Sc)  | 0.61     | 0.04      | 0.52     | 0.68     | 1.00 | 2450     | 3786     |
| ## rescor(Alt,Sc)  | 0.59     | 0.04      | 0.50     | 0.67     | 1.00 | 1961     | 3439     |
| ## rescor(Ho2,Sc)  | 0.69     | 0.03      | 0.62     | 0.76     | 1.01 | 1796     | 4334     |
| ## rescor(In,Sc)   | 0.73     | 0.03      | 0.67     | 0.79     | 1.00 | 1710     | 3960     |
| ## rescor(Std,Y)   | 0.65     | 0.04      | 0.57     | 0.71     | 1.00 | 2817     | 4495     |
| ## rescor(Alt,Y)   | 0.63     | 0.04      | 0.55     | 0.70     | 1.00 | 2536     | 3823     |
| ## rescor(Ho2,Y)   | 0.72     | 0.03      | 0.65     | 0.77     | 1.01 | 2397     | 4278     |
| ## rescor(In,Y)    | 0.95     | 0.01      | 0.93     | 0.96     | 1.01 | 1192     | 3500     |
| ## rescor(Sc,Y)    | 0.87     | 0.02      | 0.84     | 0.90     | 1.00 | 3303     | 4691     |
| ## rescor(Std,Be)  | 0.49     | 0.05      | 0.39     | 0.58     | 1.00 | 3064     | 4036     |
| ## rescor(Alt,Be)  | 0.48     | 0.05      | 0.38     | 0.57     | 1.00 | 2924     | 4175     |
| ## rescor(Ho2,Be)  | 0.55     | 0.04      | 0.46     | 0.63     | 1.00 | 3025     | 4296     |
| ## rescor(In,Be)   | 0.64     | 0.04      | 0.55     | 0.71     | 1.00 | 1710     | 3442     |
| ## rescor(Sc,Be)   | 0.61     | 0.04      | 0.52     | 0.69     | 1.00 | 2191     | 4027     |
| ## rescor(Y,Be)    | 0.65     | 0.04      | 0.57     | 0.72     | 1.00 | 1901     | 3844     |
| ## rescor(Std,Co)  | 0.64     | 0.04      | 0.57     | 0.71     | 1.00 | 2855     | 4082     |
| ## rescor(Alt,Co)  | 0.62     | 0.04      | 0.54     | 0.69     | 1.00 | 2762     | 3805     |
| ## rescor(Ho2,Co)  | 0.73     | 0.03      | 0.67     | 0.79     | 1.00 | 2977     | 3654     |
| ## rescor(In,Co)   | 0.86     | 0.02      | 0.82     | 0.89     | 1.00 | 1542     | 3425     |

```

## rescor(Sc,Co)      0.83      0.02      0.78      0.87 1.01      1721      3908
## rescor(Y,Co)      0.91      0.01      0.88      0.93 1.01      1586      3370
## rescor(Be,Co)     0.87      0.02      0.83      0.90 1.00      2658      4560
## rescor(Std,Th)    0.34      0.05      0.23      0.44 1.00      3292      4497
## rescor(Alt,Th)    0.36      0.05      0.26      0.46 1.00      4114      4714
## rescor(Ho2,Th)    0.30      0.06      0.18      0.41 1.00      2509      3711
## rescor(In,Th)     0.75      0.03      0.69      0.80 1.00      2015      3855
## rescor(Sc,Th)     0.24      0.06      0.11      0.36 1.01      1191      2758
## rescor(Y,Th)      0.57      0.05      0.48      0.66 1.01      1357      3212
## rescor(Be,Th)     0.63      0.04      0.54      0.70 1.00      2373      4444
## rescor(Co,Th)     0.63      0.04      0.54      0.70 1.00      1725      3357
## rescor(Std,Ho1)   0.44      0.05      0.34      0.53 1.00      3077      4364
## rescor(Alt,Ho1)   0.48      0.05      0.38      0.56 1.00      3916      4466
## rescor(Ho2,Ho1)   0.35      0.06      0.23      0.46 1.00      2210      3481
## rescor(In,Ho1)    0.81      0.02      0.76      0.85 1.01      1511      2675
## rescor(Sc,Ho1)    0.31      0.06      0.19      0.43 1.01      1139      2518
## rescor(Y,Ho1)     0.65      0.04      0.56      0.72 1.01      1191      2499
## rescor(Be,Ho1)    0.60      0.04      0.52      0.67 1.00      2155      3825
## rescor(Co,Ho1)    0.66      0.04      0.57      0.72 1.01      1554      3213
## rescor(Th,Ho1)    0.97      0.00      0.96      0.98 1.00      2470      4121
##
## Draws were sampled using sampling(NUTS). For each parameter, Bulk_ESS
## and Tail_ESS are effective sample size measures, and Rhat is the potential
## scale reduction factor on split chains (at convergence, Rhat = 1).

```

Again, no glaring issues with the HMC sampling.

## Model checks

Posterior predictive checks are useful for visualizing the extent to which the fitted model generates replicate data that resembles the observed data.

## Density overlay

Another posterior predictive check using the density overlay.

in-sample

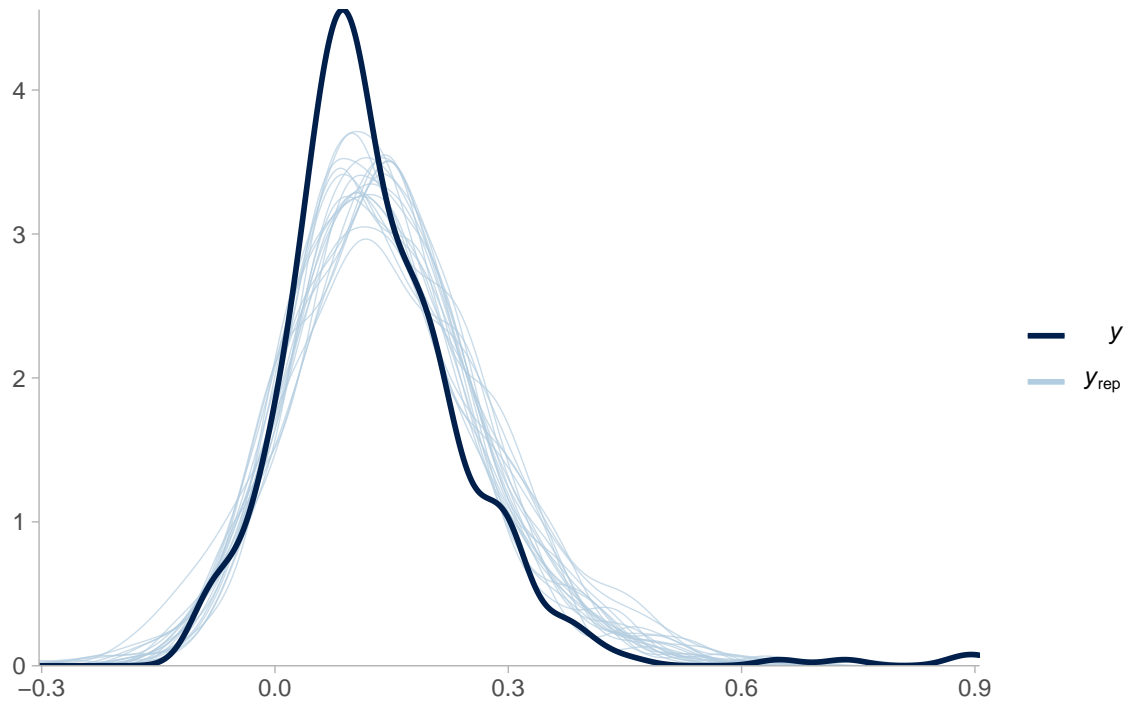

alt.isotope

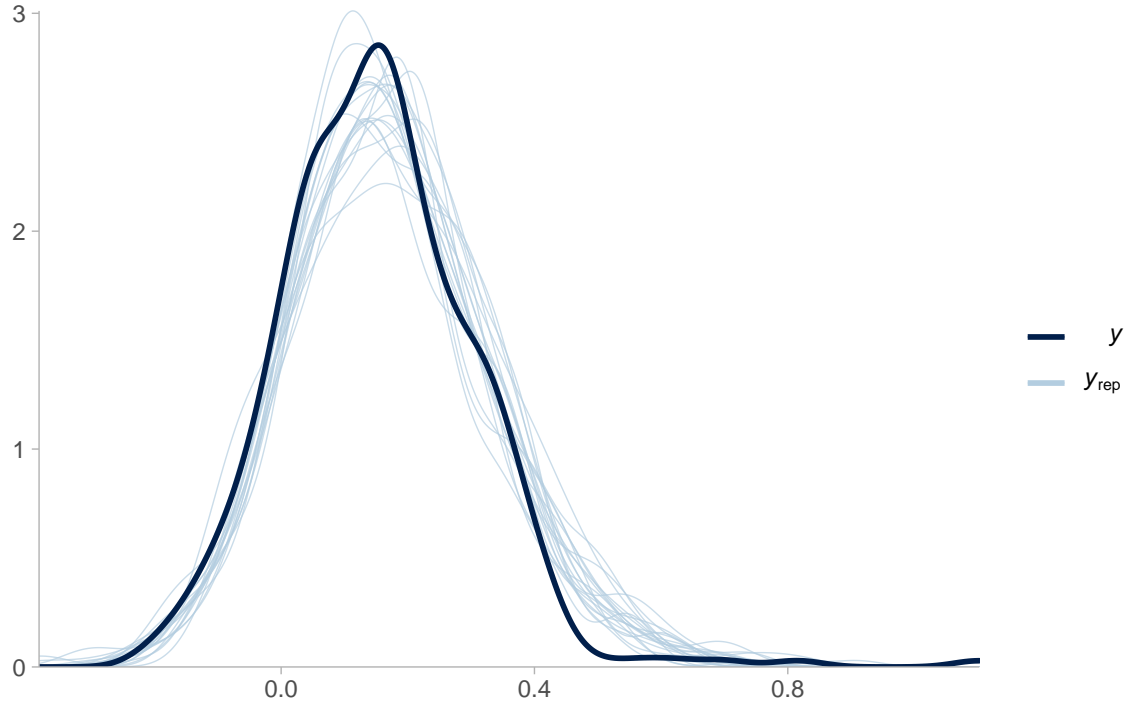

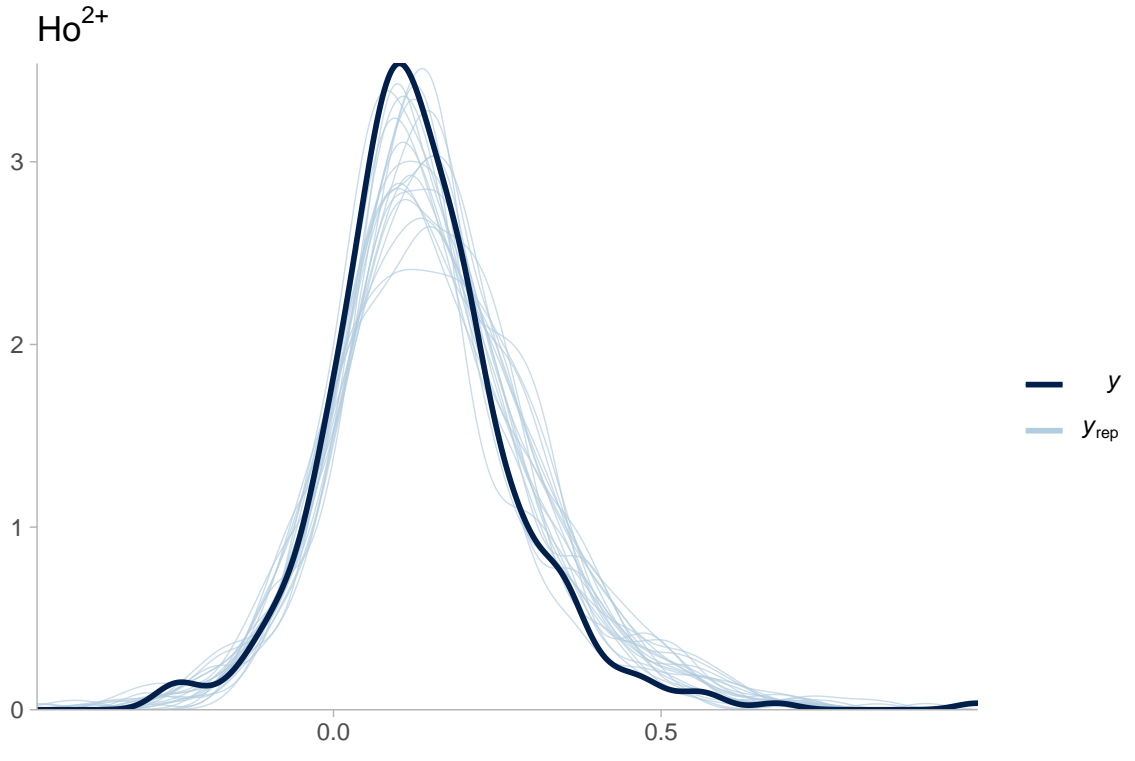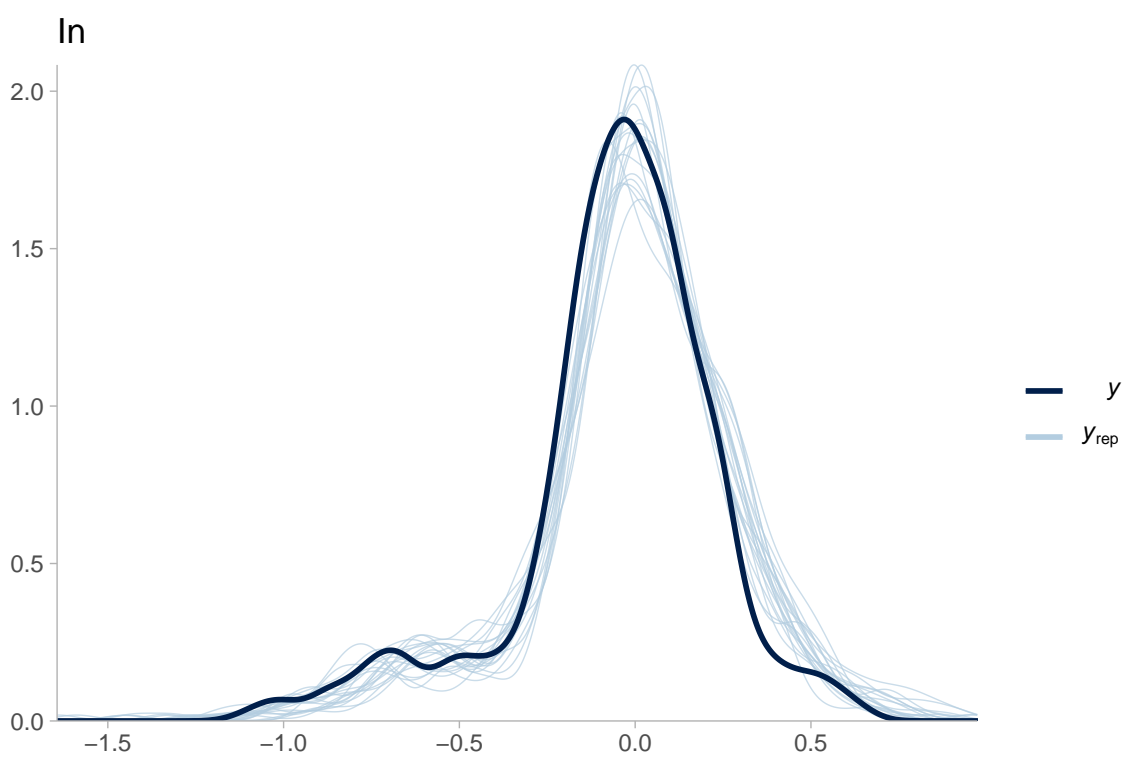



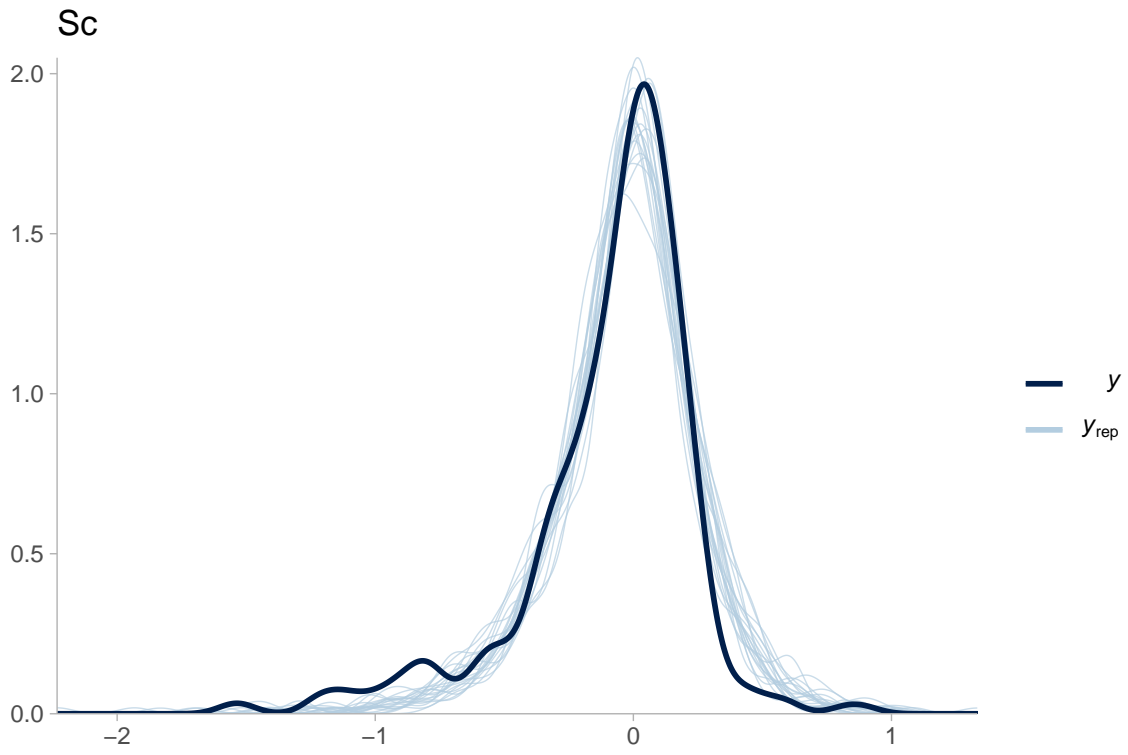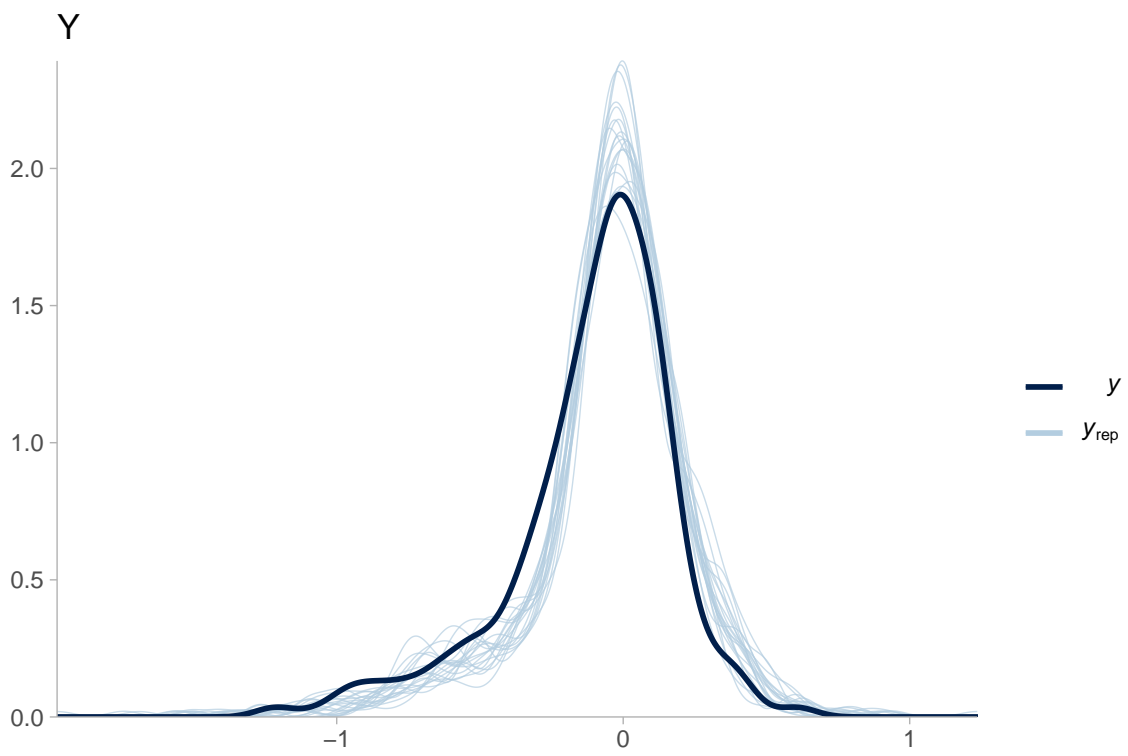

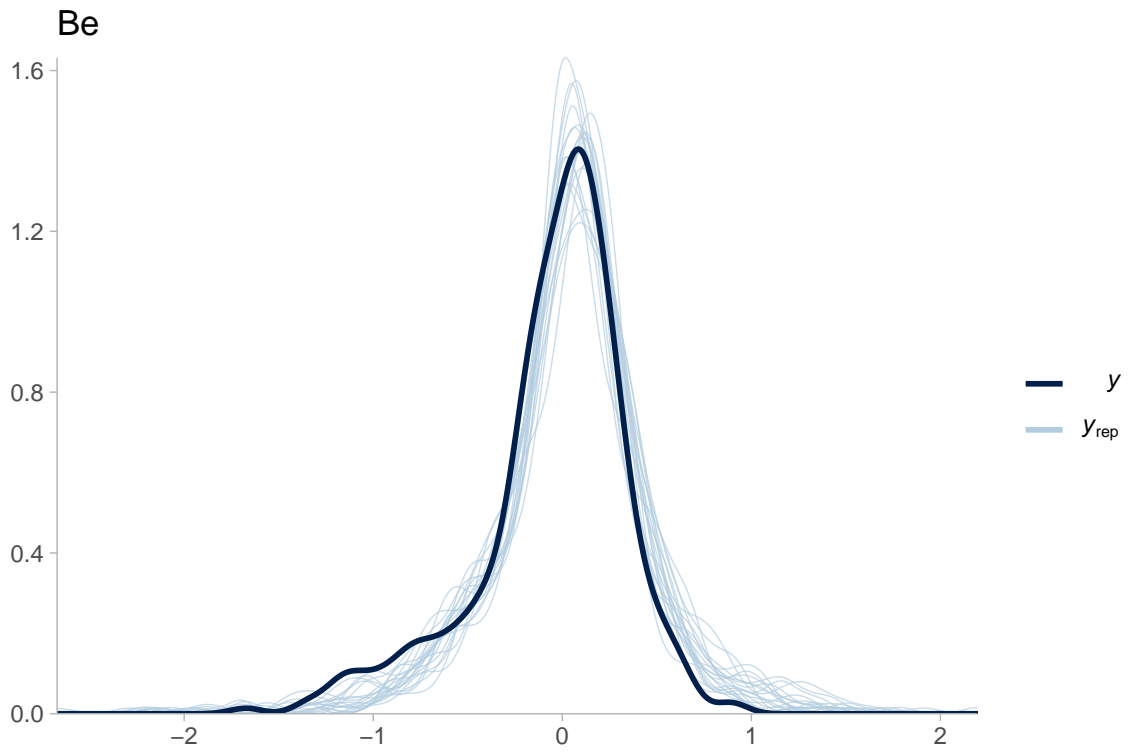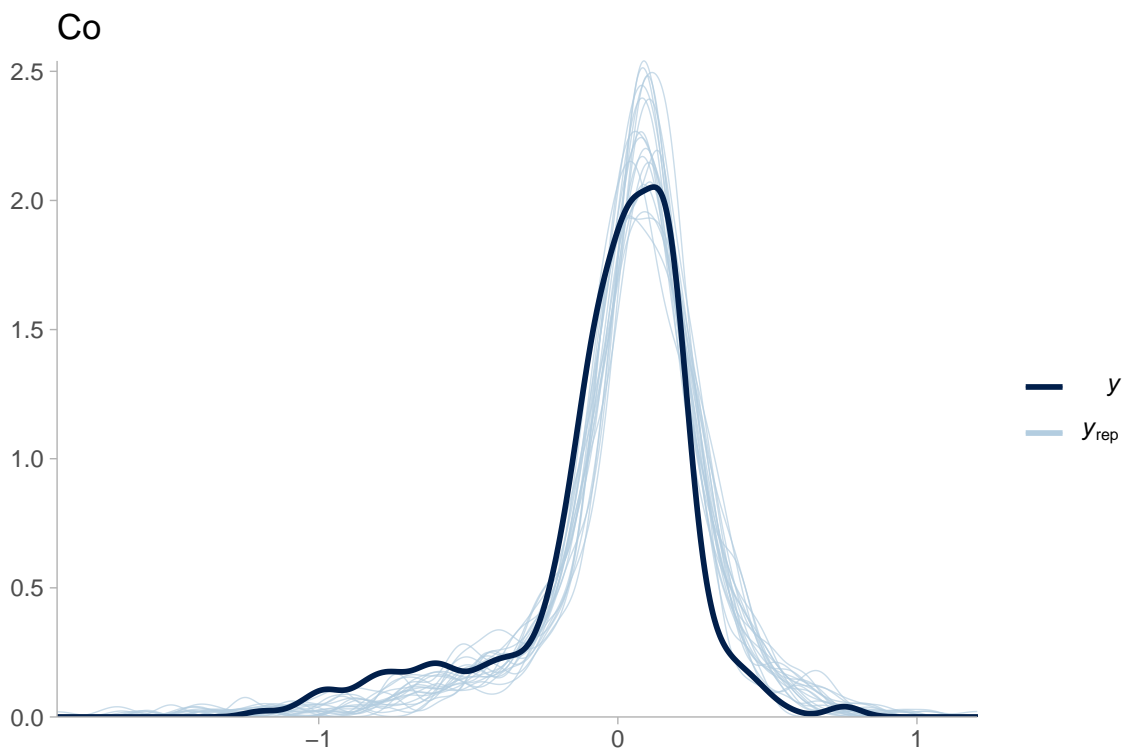

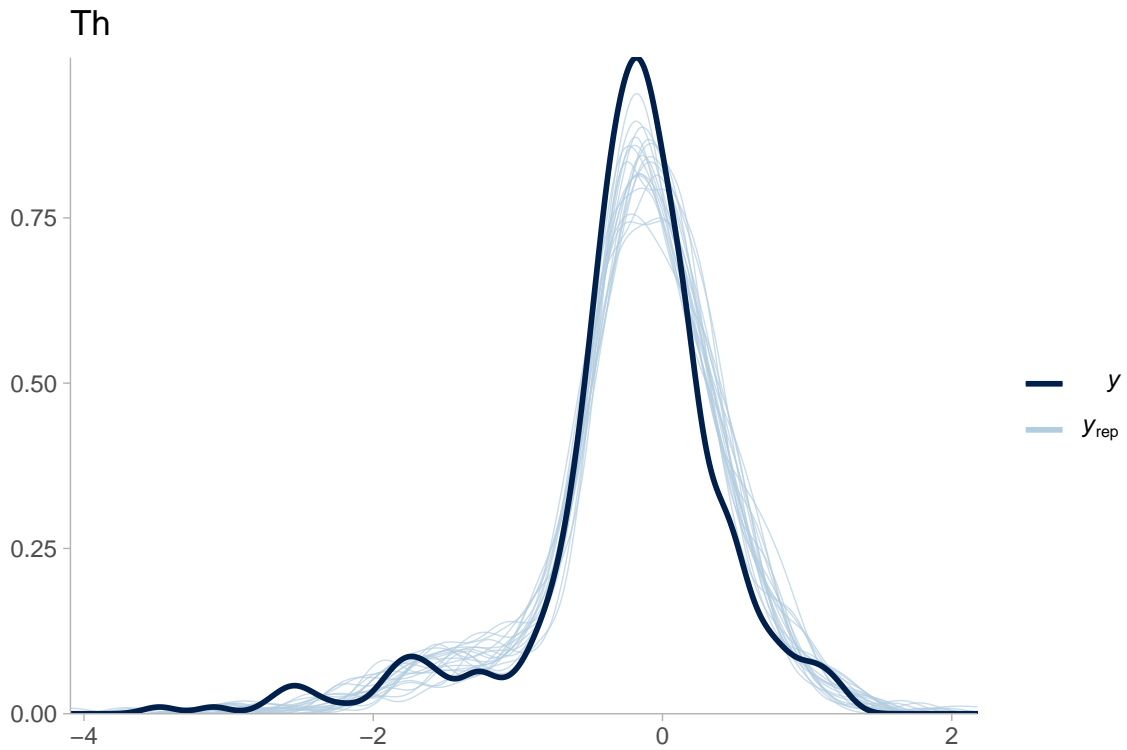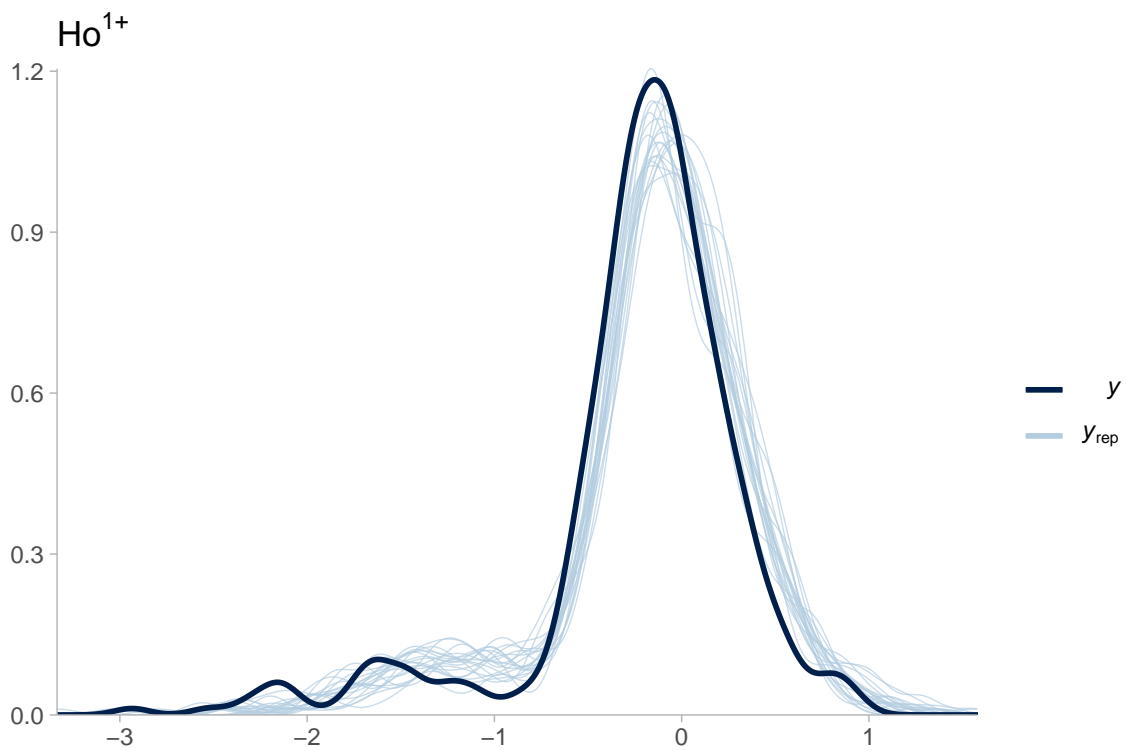

Though a clear improvement over the first model, there are still indications that the model predictions are under-dispersed relative to the observed data for some of the methods. Adding more structure could be helpful.

## Leave-one-out CV

The `loo` procedure is performed again, for comparison with the previous and later models.

```
load("full-analysis-files/mod2_As_mv.rda")

loo_2 <- loo(x = mod2,
            pointwise = TRUE,
            moment_match = TRUE,
            save_psis = TRUE,
            cores = 10)
save(loo_2, file = "full-analysis-files/loo_2.rda")
```

```
##
## Computed from 6000 by 352 log-likelihood matrix
##
##           Estimate      SE
## elpd_loo  4123.9  98.0
## p_loo      416.2  18.8
## looic     -8247.7 195.9
## -----
## Monte Carlo SE of elpd_loo is NA.
##
## Pareto k diagnostic values:
##           Count Pct.    Min. n_eff
## (-Inf, 0.5] (good)   247  70.2%   473
## (0.5, 0.7]  (ok)     75  21.3%   149
## (0.7, 1]   (bad)     27  7.7%    17
## (1, Inf)   (very bad) 3  0.9%    9
## See help('pareto-k-diagnostic') for details.
```

The `loo` calculation resulted in a large (30) number of potentially “problematic” observations.

```
## # A tibble: 30 x 14
##   ider   matrix day_expt tune      Alt      Ho2      In      Std      Sc      Y
##   <chr> <fct> <fct> <fct> <dbl> <dbl> <dbl> <dbl> <dbl> <dbl>
## 1 water_~ water~ 316  LHe  -0.0553 -0.0113 -0.204 -0.0593 -0.262 -0.240
## 2 water_~ water~ 316  LHe  -0.047  -0.0199 -0.112 -0.0881 -0.169 -0.122
## 3 water_~ water~ 316  LHe  -0.104  -0.0816 -0.274 -0.0951 -0.367 -0.322
## 4 water_~ water~ 316  LHe   0.0505  0.112  -0.0572  0.0225  0.0469 -0.0167
## 5 P04316~ P04    316  LHe  -0.0479  0.0836 -0.215  0.0733 -0.0739 -0.184
## 6 water_~ water~ 320  LHe   0.181  0.004  -0.0972  0.102  -0.141 -0.109
## 7 neat_1~ neat_1 320  LHe   0.227  0.0949  0.0259  0.136  0.0539  0.0357
## 8 water_~ water~ 320  LHe   0.0467 -0.0148 -0.0861  0.0962 -0.116 -0.101
## 9 Mg320L~ Mg     320  LHe   0.199  0.0731  0.411  0.153  0.171  0.277
## 10 K320LHe K     320  LHe   0.131  0.0409  0.300  0.0956  0.132  0.192
## # ... with 20 more rows, and 4 more variables: Be <dbl>, Co <dbl>, Th <dbl>,
## #   Ho1 <dbl>
```

Most of these, again, look to be observations in the 250ppm matrices. However, it is not all, so there may be other issues to consider. With so many  $k > 0.7$ , it is important to check that the model isn't just terribly mis-specified. Comparing the number of model parameters ( $p = 745$ ) to  $p_{loo}$  can be helpful in this regard. In this case,  $p_{loo} \ll p$ , suggesting that the model may be mispecified, which would maybe

agree with the posterior predictive checks above (see: <https://mc-stan.org/loo/reference/loo-glossary.html>). However, another reasonable explanation would be that, with so many latent parameters over the different groupings (i.e, varying effects) with relatively few observations per group, leaving out any observations from any particular group can make for a noisy CV process. A solution, in that case, may be to add stronger priors over the standard deviations for the varying effects, but the current priors should already be reasonably informative to stabilize estimates. Therefore, the approach taken below will be to just add more structure to the model, particularly since the posterior predictive checks also hinted at some potential for mis-specification.

With regard to just calculating the CV criteria for this model, given the high number of potentially problematic observations it would be too computationally expensive to reloo, so a k-fold CV is in order. A k-fold CV is also needed for model 1 because it isn't recommended to compare loo-CV and k-fold CV metrics.

## K-fold CV

K-fold CV can be performed using the **brms** or **loo** package, and involves refitting the model K times, each time leaving out one-Kth of the original data (<http://paul-buerkner.github.io/brms/reference/kfold.html>).

First, the k-fold for model 1, where k = 10.

```
load("full-analysis-files/mod1_As_mv.rda")

library(future)
plan(multisession(workers = 10), gc = TRUE)
kfold_1 <- kfold(x = mod1, save_fits = TRUE, K = 10, chains = 4)
save(kfold_1, file = "full-analysis-files/kfold_1.rda")
plan(sequential)
```

Then, for model 2.

```
load("full-analysis-files/mod2_As_mv.rda")

library(future)
plan(multisession(workers = 10), gc = TRUE)
kfold_2 <- kfold(x = mod2, save_fits = TRUE, K = 10, chains = 4)
save(kfold_2, file = "full-analysis-files/kfold_2.rda")
plan(sequential)
```

The results for model 1.

```
##
## Based on 10-fold cross-validation
##
##           Estimate    SE
## elpd_kfold  3397.0  84.1
## p_kfold     384.1  24.3
## kfoldic     -6793.9 168.2
```

And for model 2.

```
##
## Based on 10-fold cross-validation
```

```
##
##           Estimate    SE
## elpd_kfold  4145.8 100.5
## p_kfold     522.5  24.3
## kfoldic     -8291.6 200.9
```

The direct comparison.

```
##      elpd_diff se_diff
## mod3    0.0      0.0
## mod1 -748.8     58.7
```

Clearly, model 2 is preferred by this metric. It has a much larger  $elpd_{kfold}$  and the difference from mod1 is much larger than standard error of the difference. It would be expected to perform better out-of-sample. However, the potential mis-specification remains, so another model is constructed below with additional structure.

## A final model for arsenic

For the next model, additional structure is added to the  $\mu$  term. In this model, the tune effect is allowed to vary by matrix and day of the experiment. That is, the difference between between the HHe tune and LHe tune is allowed to vary according to matrix and/or day of the experiment.

```
load("full-analysis-files/df_mv_as.rda")

bf_Std <- bf(Std ~ tune + (tune | matrix) + (tune | day_expt),
            sigma ~ tune + (1 | matrix) + (1 | day_expt),
            family = gaussian())

bf_Alt <- bf(Alt ~ tune + (tune | matrix) + (tune | day_expt),
            sigma ~ tune + (1 | matrix) + (1 | day_expt),
            family = gaussian())

bf_Ho2 <- bf(Ho2 ~ tune + (tune | matrix) + (tune | day_expt),
            sigma ~ tune + (1 | matrix) + (1 | day_expt),
            family = gaussian())

bf_In <- bf(In ~ tune + (tune | matrix) + (tune | day_expt),
            sigma ~ tune + (1 | matrix) + (1 | day_expt),
            family = gaussian())

bf_Sc <- bf(Sc ~ tune + (tune | matrix) + (tune | day_expt),
            sigma ~ tune + (1 | matrix) + (1 | day_expt),
            family = gaussian())

bf_Y <- bf(Y ~ tune + (tune | matrix) + (tune | day_expt),
            sigma ~ tune + (1 | matrix) + (1 | day_expt),
            family = gaussian())

bf_Be <- bf(Be ~ tune + (tune | matrix) + (tune | day_expt),
            sigma ~ tune + (1 | matrix) + (1 | day_expt),
```

```

    family = gaussian()

bf_Co <- bf(Co ~ tune + (tune | matrix) + (tune | day_expt),
  sigma ~ tune + (1 | matrix) + (1 | day_expt),
  family = gaussian())

bf_Th <- bf(Th ~ tune + (tune | matrix) + (tune | day_expt),
  sigma ~ tune + (1 | matrix) + (1 | day_expt),
  family = gaussian())

bf_Ho1 <- bf(Ho1 ~ tune + (tune | matrix) + (tune | day_expt),
  sigma ~ tune + (1 | matrix) + (1 | day_expt),
  family = gaussian())

mod3 <- brm(bf_Std +
  bf_Alt +
  bf_Ho2 +
  bf_In +
  bf_Sc +
  bf_Y +
  bf_Be +
  bf_Co +
  bf_Th +
  bf_Ho1 +
  set_rescor(TRUE),
  data = df_mv_as,
  prior = c(prior(normal(0, 1), class = "Intercept", resp = "Std"),
    prior(normal(0, 1), class = "Intercept", resp = "Alt"),
    prior(normal(0, 1), class = "Intercept", resp = "Ho2"),
    prior(normal(0, 1), class = "Intercept", resp = "In"),
    prior(normal(0, 1), class = "Intercept", resp = "Sc"),
    prior(normal(0, 1), class = "Intercept", resp = "Y"),
    prior(normal(0, 1), class = "Intercept", resp = "Be"),
    prior(normal(0, 1), class = "Intercept", resp = "Co"),
    prior(normal(0, 1), class = "Intercept", resp = "Th"),
    prior(normal(0, 1), class = "Intercept", resp = "Ho1"),

    prior(normal(0, 1), class = "b", resp = "Std"),
    prior(normal(0, 1), class = "b", resp = "Alt"),
    prior(normal(0, 1), class = "b", resp = "Ho2"),
    prior(normal(0, 1), class = "b", resp = "In"),
    prior(normal(0, 1), class = "b", resp = "Sc"),
    prior(normal(0, 1), class = "b", resp = "Y"),
    prior(normal(0, 1), class = "b", resp = "Be"),
    prior(normal(0, 1), class = "b", resp = "Co"),
    prior(normal(0, 1), class = "b", resp = "Th"),
    prior(normal(0, 1), class = "b", resp = "Ho1"),

    prior(normal(0, 1), class = "sd", resp = "Std"),
    prior(normal(0, 1), class = "sd", resp = "Alt"),
    prior(normal(0, 1), class = "sd", resp = "Ho2"),
    prior(normal(0, 1), class = "sd", resp = "In"),
    prior(normal(0, 1), class = "sd", resp = "Sc"),

```

```

prior(normal(0, 1), class = "sd", resp = "Y"),
prior(normal(0, 1), class = "sd", resp = "Be"),
prior(normal(0, 1), class = "sd", resp = "Co"),
prior(normal(0, 1), class = "sd", resp = "Th"),
prior(normal(0, 1), class = "sd", resp = "Ho1"),

prior(normal(-1, 2), class = "Intercept", dpar = "sigma", resp = "Std"),
prior(normal(-1, 2), class = "Intercept", dpar = "sigma", resp = "Alt"),
prior(normal(-1, 2), class = "Intercept", dpar = "sigma", resp = "Ho2"),
prior(normal(-1, 2), class = "Intercept", dpar = "sigma", resp = "In"),
prior(normal(-1, 2), class = "Intercept", dpar = "sigma", resp = "Sc"),
prior(normal(-1, 2), class = "Intercept", dpar = "sigma", resp = "Y"),
prior(normal(-1, 2), class = "Intercept", dpar = "sigma", resp = "Be"),
prior(normal(-1, 2), class = "Intercept", dpar = "sigma", resp = "Co"),
prior(normal(-1, 2), class = "Intercept", dpar = "sigma", resp = "Th"),
prior(normal(-1, 2), class = "Intercept", dpar = "sigma", resp = "Ho1"),

prior(normal(0, 1), class = "b", dpar = "sigma", resp = "Std"),
prior(normal(0, 1), class = "b", dpar = "sigma", resp = "Alt"),
prior(normal(0, 1), class = "b", dpar = "sigma", resp = "Ho2"),
prior(normal(0, 1), class = "b", dpar = "sigma", resp = "In"),
prior(normal(0, 1), class = "b", dpar = "sigma", resp = "Sc"),
prior(normal(0, 1), class = "b", dpar = "sigma", resp = "Y"),
prior(normal(0, 1), class = "b", dpar = "sigma", resp = "Be"),
prior(normal(0, 1), class = "b", dpar = "sigma", resp = "Co"),
prior(normal(0, 1), class = "b", dpar = "sigma", resp = "Th"),
prior(normal(0, 1), class = "b", dpar = "sigma", resp = "Ho1"),

prior(normal(0, 1), class = "sd", dpar = "sigma", resp = "Std"),
prior(normal(0, 1), class = "sd", dpar = "sigma", resp = "Alt"),
prior(normal(0, 1), class = "sd", dpar = "sigma", resp = "Ho2"),
prior(normal(0, 1), class = "sd", dpar = "sigma", resp = "In"),
prior(normal(0, 1), class = "sd", dpar = "sigma", resp = "Sc"),
prior(normal(0, 1), class = "sd", dpar = "sigma", resp = "Y"),
prior(normal(0, 1), class = "sd", dpar = "sigma", resp = "Be"),
prior(normal(0, 1), class = "sd", dpar = "sigma", resp = "Co"),
prior(normal(0, 1), class = "sd", dpar = "sigma", resp = "Th"),
prior(normal(0, 1), class = "sd", dpar = "sigma", resp = "Ho1"),

prior(lkj(1), class = "rescor")
),
control = list(adapt_delta = 0.95, max_treedepth = 14),
init_r = 0.05,
save_pars = save_pars(all = TRUE),
seed = 5214,
chains=4,
iter=3000,
cores=4 )

save(mod3, file = "full-analysis-files/mod3_As_mv.rda")

```



## Tabular parameter estimates

Again, a summary of the posterior estimates.

```
## Family: MV(gaussian, gaussian, gaussian, gaussian, gaussian, gaussian, gaussian, gaussian, gaussian)
## Links: mu = identity; sigma = log
##          mu = identity; sigma = log
## Formula: Std ~ tune + (tune | matrix) + (tune | day_expt)
##           sigma ~ tune + (1 | matrix) + (1 | day_expt)
##           Alt ~ tune + (tune | matrix) + (tune | day_expt)
##           sigma ~ tune + (1 | matrix) + (1 | day_expt)
##           Ho2 ~ tune + (tune | matrix) + (tune | day_expt)
##           sigma ~ tune + (1 | matrix) + (1 | day_expt)
##           In ~ tune + (tune | matrix) + (tune | day_expt)
##           sigma ~ tune + (1 | matrix) + (1 | day_expt)
##           Sc ~ tune + (tune | matrix) + (tune | day_expt)
##           sigma ~ tune + (1 | matrix) + (1 | day_expt)
##           Y ~ tune + (tune | matrix) + (tune | day_expt)
##           sigma ~ tune + (1 | matrix) + (1 | day_expt)
##           Be ~ tune + (tune | matrix) + (tune | day_expt)
##           sigma ~ tune + (1 | matrix) + (1 | day_expt)
##           Co ~ tune + (tune | matrix) + (tune | day_expt)
##           sigma ~ tune + (1 | matrix) + (1 | day_expt)
##           Th ~ tune + (tune | matrix) + (tune | day_expt)
##           sigma ~ tune + (1 | matrix) + (1 | day_expt)
##           Ho1 ~ tune + (tune | matrix) + (tune | day_expt)
##           sigma ~ tune + (1 | matrix) + (1 | day_expt)
## Data: df_mv_as (Number of observations: 352)
## Draws: 4 chains, each with iter = 3000; warmup = 1500; thin = 1;
##         total post-warmup draws = 6000
##
## Priors:
## b_Alt ~ normal(0, 1)
## b_Alt_sigma ~ normal(0, 1)
## b_Be ~ normal(0, 1)
## b_Be_sigma ~ normal(0, 1)
## b_Co ~ normal(0, 1)
## b_Co_sigma ~ normal(0, 1)
## b_Ho1 ~ normal(0, 1)
## b_Ho1_sigma ~ normal(0, 1)
## b_Ho2 ~ normal(0, 1)
## b_Ho2_sigma ~ normal(0, 1)
## b_In ~ normal(0, 1)
## b_In_sigma ~ normal(0, 1)
## b_Sc ~ normal(0, 1)
## b_Sc_sigma ~ normal(0, 1)
```

```

## b_Std ~ normal(0, 1)
## b_Std_sigma ~ normal(0, 1)
## b_Th ~ normal(0, 1)
## b_Th_sigma ~ normal(0, 1)
## b_Y ~ normal(0, 1)
## b_Y_sigma ~ normal(0, 1)
## Intercept_Alt ~ normal(0, 1)
## Intercept_Alt_sigma ~ normal(-1, 2)
## Intercept_Be ~ normal(0, 1)
## Intercept_Be_sigma ~ normal(-1, 2)
## Intercept_Co ~ normal(0, 1)
## Intercept_Co_sigma ~ normal(-1, 2)
## Intercept_Ho1 ~ normal(0, 1)
## Intercept_Ho1_sigma ~ normal(-1, 2)
## Intercept_Ho2 ~ normal(0, 1)
## Intercept_Ho2_sigma ~ normal(-1, 2)
## Intercept_In ~ normal(0, 1)
## Intercept_In_sigma ~ normal(-1, 2)
## Intercept_Sc ~ normal(0, 1)
## Intercept_Sc_sigma ~ normal(-1, 2)
## Intercept_Std ~ normal(0, 1)
## Intercept_Std_sigma ~ normal(-1, 2)
## Intercept_Th ~ normal(0, 1)
## Intercept_Th_sigma ~ normal(-1, 2)
## Intercept_Y ~ normal(0, 1)
## Intercept_Y_sigma ~ normal(-1, 2)
## L ~ lkj_corr_cholesky(1)
## Lrescor ~ lkj_corr_cholesky(1)
## sd_Alt ~ normal(0, 1)
## sd_Alt_sigma ~ normal(0, 1)
## sd_Be ~ normal(0, 1)
## sd_Be_sigma ~ normal(0, 1)
## sd_Co ~ normal(0, 1)
## sd_Co_sigma ~ normal(0, 1)
## sd_Ho1 ~ normal(0, 1)
## sd_Ho1_sigma ~ normal(0, 1)
## sd_Ho2 ~ normal(0, 1)
## sd_Ho2_sigma ~ normal(0, 1)
## sd_In ~ normal(0, 1)
## sd_In_sigma ~ normal(0, 1)
## sd_Sc ~ normal(0, 1)
## sd_Sc_sigma ~ normal(0, 1)
## sd_Std ~ normal(0, 1)
## sd_Std_sigma ~ normal(0, 1)
## sd_Th ~ normal(0, 1)
## sd_Th_sigma ~ normal(0, 1)
## sd_Y ~ normal(0, 1)
## sd_Y_sigma ~ normal(0, 1)
##
## Group-Level Effects:
## ~day_expt (Number of levels: 8)
##
##           Estimate Est.Error 1-95% CI u-95% CI Rhat
## sd(Std_Intercept)          0.05      0.02    0.03    0.10 1.00
## sd(Std_tuneHHe)            0.01      0.01    0.00    0.04 1.00

```

```

## sd(sigma_Std_Intercept)      0.25      0.10      0.12      0.51 1.00
## sd(Alt_Intercept)           0.13      0.05      0.07      0.26 1.00
## sd(Alt_tuneHHe)             0.12      0.05      0.07      0.24 1.00
## sd(sigma_Alt_Intercept)     0.22      0.09      0.10      0.45 1.00
## sd(Ho2_Intercept)           0.05      0.02      0.03      0.10 1.00
## sd(Ho2_tuneHHe)             0.09      0.03      0.05      0.18 1.00
## sd(sigma_Ho2_Intercept)     0.35      0.13      0.18      0.66 1.00
## sd(In_Intercept)            0.26      0.09      0.15      0.48 1.00
## sd(In_tuneHHe)              0.05      0.03      0.01      0.11 1.00
## sd(sigma_In_Intercept)      0.35      0.12      0.19      0.65 1.00
## sd(Sc_Intercept)            0.17      0.06      0.09      0.33 1.00
## sd(Sc_tuneHHe)              0.08      0.04      0.03      0.17 1.00
## sd(sigma_Sc_Intercept)      0.34      0.13      0.18      0.66 1.00
## sd(Y_Intercept)             0.26      0.10      0.14      0.51 1.00
## sd(Y_tuneHHe)               0.05      0.02      0.02      0.11 1.00
## sd(sigma_Y_Intercept)       0.37      0.13      0.21      0.71 1.00
## sd(Be_Intercept)            0.26      0.10      0.14      0.53 1.00
## sd(Be_tuneHHe)              0.22      0.09      0.11      0.45 1.00
## sd(sigma_Be_Intercept)      0.38      0.14      0.20      0.72 1.00
## sd(Co_Intercept)            0.23      0.08      0.13      0.43 1.00
## sd(Co_tuneHHe)              0.11      0.04      0.05      0.22 1.00
## sd(sigma_Co_Intercept)      0.41      0.14      0.23      0.78 1.00
## sd(Th_Intercept)            0.55      0.18      0.31      1.00 1.00
## sd(Th_tuneHHe)              0.12      0.05      0.05      0.24 1.00
## sd(sigma_Th_Intercept)      0.52      0.18      0.30      0.97 1.00
## sd(Ho1_Intercept)           0.53      0.18      0.30      0.97 1.00
## sd(Ho1_tuneHHe)             0.12      0.05      0.06      0.24 1.00
## sd(sigma_Ho1_Intercept)     0.47      0.16      0.27      0.86 1.00
## cor(Std_Intercept,Std_tuneHHe) 0.12      0.56     -0.91      0.96 1.00
## cor(Alt_Intercept,Alt_tuneHHe) -0.51     0.29     -0.90      0.22 1.00
## cor(Ho2_Intercept,Ho2_tuneHHe) -0.65     0.26     -0.95      0.04 1.00
## cor(In_Intercept,In_tuneHHe)  -0.78     0.26     -1.00     -0.03 1.00
## cor(Sc_Intercept,Sc_tuneHHe)  -0.31     0.40     -0.91      0.54 1.00
## cor(Y_Intercept,Y_tuneHHe)   -0.31     0.43     -0.93      0.62 1.00
## cor(Be_Intercept,Be_tuneHHe)  0.04     0.37     -0.67      0.73 1.00
## cor(Co_Intercept,Co_tuneHHe)  0.49     0.33     -0.32      0.92 1.00
## cor(Th_Intercept,Th_tuneHHe) -0.09     0.43     -0.80      0.73 1.00
## cor(Ho1_Intercept,Ho1_tuneHHe) 0.07     0.40     -0.70      0.77 1.00
##
##                               Bulk_ESS Tail_ESS
## sd(Std_Intercept)            3817    3909
## sd(Std_tuneHHe)              4030    3866
## sd(sigma_Std_Intercept)      3390    4321
## sd(Alt_Intercept)            4062    4051
## sd(Alt_tuneHHe)              4136    3984
## sd(sigma_Alt_Intercept)      3274    4162
## sd(Ho2_Intercept)            3943    3977
## sd(Ho2_tuneHHe)              4616    4436
## sd(sigma_Ho2_Intercept)      4093    4383
## sd(In_Intercept)             5454    4250
## sd(In_tuneHHe)               3181    3483
## sd(sigma_In_Intercept)       5855    4609
## sd(Sc_Intercept)             5864    4477
## sd(Sc_tuneHHe)               3411    3764
## sd(sigma_Sc_Intercept)       4974    4432

```

```

## sd(Y_Intercept)           5051    3333
## sd(Y_tuneHHe)            3772    2611
## sd(sigma_Y_Intercept)    6371    4577
## sd(Be_Intercept)         5129    4426
## sd(Be_tuneHHe)           4361    4423
## sd(sigma_Be_Intercept)   4589    4465
## sd(Co_Intercept)         4966    4367
## sd(Co_tuneHHe)           3936    3936
## sd(sigma_Co_Intercept)   5707    4972
## sd(Th_Intercept)         6235    4958
## sd(Th_tuneHHe)           6281    4695
## sd(sigma_Th_Intercept)   6429    4403
## sd(Ho1_Intercept)        6134    4400
## sd(Ho1_tuneHHe)          5060    3954
## sd(sigma_Ho1_Intercept)  6571    4685
## cor(Std_Intercept,Std_tuneHHe) 8554    4471
## cor(Alt_Intercept,Alt_tuneHHe) 4996    4178
## cor(Ho2_Intercept,Ho2_tuneHHe) 5014    4847
## cor(In_Intercept,In_tuneHHe) 4760    4405
## cor(Sc_Intercept,Sc_tuneHHe) 4639    4175
## cor(Y_Intercept,Y_tuneHHe) 4027    3430
## cor(Be_Intercept,Be_tuneHHe) 6245    4211
## cor(Co_Intercept,Co_tuneHHe) 4675    4137
## cor(Th_Intercept,Th_tuneHHe) 6662    4624
## cor(Ho1_Intercept,Ho1_tuneHHe) 6495    4306
##
## ~matrix (Number of levels: 22)
##
## Estimate Est.Error 1-95% CI u-95% CI Rhat
## sd(Std_Intercept)           0.06    0.01    0.04    0.09 1.00
## sd(Std_tuneHHe)             0.01    0.01    0.00    0.03 1.00
## sd(sigma_Std_Intercept)     0.09    0.05    0.01    0.19 1.00
## sd(Alt_Intercept)           0.06    0.01    0.04    0.09 1.00
## sd(Alt_tuneHHe)             0.02    0.01    0.00    0.04 1.00
## sd(sigma_Alt_Intercept)     0.11    0.05    0.02    0.21 1.00
## sd(Ho2_Intercept)           0.07    0.01    0.05    0.11 1.00
## sd(Ho2_tuneHHe)             0.01    0.01    0.00    0.03 1.00
## sd(sigma_Ho2_Intercept)     0.06    0.04    0.00    0.15 1.00
## sd(In_Intercept)            0.07    0.01    0.05    0.11 1.00
## sd(In_tuneHHe)              0.05    0.01    0.03    0.08 1.00
## sd(sigma_In_Intercept)      0.14    0.03    0.08    0.21 1.00
## sd(Sc_Intercept)            0.09    0.02    0.07    0.13 1.00
## sd(Sc_tuneHHe)              0.10    0.02    0.07    0.15 1.00
## sd(sigma_Sc_Intercept)      0.28    0.06    0.19    0.41 1.00
## sd(Y_Intercept)             0.06    0.01    0.04    0.08 1.00
## sd(Y_tuneHHe)               0.05    0.01    0.03    0.07 1.00
## sd(sigma_Y_Intercept)       0.16    0.04    0.09    0.24 1.00
## sd(Be_Intercept)            0.08    0.01    0.05    0.11 1.00
## sd(Be_tuneHHe)              0.07    0.02    0.04    0.12 1.00
## sd(sigma_Be_Intercept)      0.16    0.05    0.07    0.27 1.00
## sd(Co_Intercept)            0.04    0.01    0.02    0.06 1.00
## sd(Co_tuneHHe)              0.03    0.01    0.02    0.05 1.00
## sd(sigma_Co_Intercept)      0.09    0.04    0.02    0.17 1.00
## sd(Th_Intercept)            0.25    0.04    0.18    0.35 1.01
## sd(Th_tuneHHe)              0.20    0.04    0.14    0.28 1.00

```

```

## sd(sigma_Th_Intercept)      0.05      0.03      0.01      0.11 1.00
## sd(Ho1_Intercept)          0.18      0.03      0.13      0.24 1.00
## sd(Ho1_tuneHHe)            0.13      0.02      0.09      0.18 1.00
## sd(sigma_Ho1_Intercept)    0.04      0.02      0.00      0.10 1.00
## cor(Std_Intercept,Std_tuneHHe) -0.20    0.49    -0.94    0.85 1.00
## cor(Alt_Intercept,Alt_tuneHHe) -0.13    0.44    -0.88    0.81 1.00
## cor(Ho2_Intercept,Ho2_tuneHHe) -0.17    0.50    -0.95    0.86 1.00
## cor(In_Intercept,In_tuneHHe)  0.97    0.04    0.86     1.00 1.00
## cor(Sc_Intercept,Sc_tuneHHe)  0.97    0.03    0.88     1.00 1.00
## cor(Y_Intercept,Y_tuneHHe)    0.96    0.06    0.79     1.00 1.00
## cor(Be_Intercept,Be_tuneHHe)  0.87    0.13    0.53     1.00 1.00
## cor(Co_Intercept,Co_tuneHHe)  0.81    0.15    0.44     0.99 1.00
## cor(Th_Intercept,Th_tuneHHe)  0.97    0.02    0.92     0.99 1.00
## cor(Ho1_Intercept,Ho1_tuneHHe) 0.99    0.01    0.96     1.00 1.00
##                               Bulk_ESS Tail_ESS
## sd(Std_Intercept)           2525    3411
## sd(Std_tuneHHe)             2622    4229
## sd(sigma_Std_Intercept)     2024    3018
## sd(Alt_Intercept)           2942    3942
## sd(Alt_tuneHHe)             1655    3050
## sd(sigma_Alt_Intercept)     1992    3199
## sd(Ho2_Intercept)           3103    4201
## sd(Ho2_tuneHHe)             2551    3633
## sd(sigma_Ho2_Intercept)     2630    4061
## sd(In_Intercept)            2829    4125
## sd(In_tuneHHe)              3091    4009
## sd(sigma_In_Intercept)      2221    3939
## sd(Sc_Intercept)            2364    4159
## sd(Sc_tuneHHe)              2713    4193
## sd(sigma_Sc_Intercept)      2557    3449
## sd(Y_Intercept)             3564    4392
## sd(Y_tuneHHe)               3874    4651
## sd(sigma_Y_Intercept)       1892    3595
## sd(Be_Intercept)            4304    4698
## sd(Be_tuneHHe)              5212    4921
## sd(sigma_Be_Intercept)      1811    2540
## sd(Co_Intercept)            2990    4109
## sd(Co_tuneHHe)              4302    4755
## sd(sigma_Co_Intercept)      1172    1263
## sd(Th_Intercept)            2101    3407
## sd(Th_tuneHHe)              2257    3325
## sd(sigma_Th_Intercept)      1448    1746
## sd(Ho1_Intercept)           2512    3304
## sd(Ho1_tuneHHe)             3007    4360
## sd(sigma_Ho1_Intercept)     1779    3218
## cor(Std_Intercept,Std_tuneHHe) 8799    4347
## cor(Alt_Intercept,Alt_tuneHHe) 7412    3495
## cor(Ho2_Intercept,Ho2_tuneHHe) 8524    4384
## cor(In_Intercept,In_tuneHHe)  2374    2826
## cor(Sc_Intercept,Sc_tuneHHe)  3099    4159
## cor(Y_Intercept,Y_tuneHHe)    1536    2037
## cor(Be_Intercept,Be_tuneHHe)  3663    3619
## cor(Co_Intercept,Co_tuneHHe)  2921    3824
## cor(Th_Intercept,Th_tuneHHe)  2990    4270

```

```

## cor(Ho1_Intercept,Ho1_tuneHHe)      2732      4045
##
## Population-Level Effects:
##           Estimate Est.Error 1-95% CI u-95% CI Rhat Bulk_ESS Tail_ESS
## Std_Intercept      0.12      0.03   0.07   0.17 1.00    3286    3706
## sigma_Std_Intercept -2.57      0.11  -2.79  -2.35 1.00    4873    4364
## Alt_Intercept       0.15      0.05   0.04   0.25 1.00    3220    3919
## sigma_Alt_Intercept -2.44      0.10  -2.64  -2.25 1.00    5595    4840
## Ho2_Intercept       0.12      0.03   0.07   0.17 1.00    2832    3621
## sigma_Ho2_Intercept -2.54      0.14  -2.82  -2.26 1.00    4250    3717
## In_Intercept       -0.04      0.10  -0.23   0.16 1.00    2583    2795
## sigma_In_Intercept  -2.31      0.14  -2.59  -2.03 1.00    2841    3490
## Sc_Intercept       -0.01      0.07  -0.14   0.13 1.00    2668    3506
## sigma_Sc_Intercept  -2.26      0.15  -2.56  -1.96 1.00    3696    3941
## Y_Intercept       -0.06      0.10  -0.26   0.14 1.00    2305    2154
## sigma_Y_Intercept  -2.36      0.15  -2.64  -2.06 1.00    3126    3638
## Be_Intercept        0.02      0.10  -0.17   0.22 1.00    2722    3328
## sigma_Be_Intercept  -2.01      0.16  -2.32  -1.69 1.00    3918    4227
## Co_Intercept        0.02      0.09  -0.16   0.20 1.00    2173    2584
## sigma_Co_Intercept  -2.32      0.16  -2.65  -2.00 1.00    2989    3515
## Th_Intercept       -0.20      0.21  -0.60   0.22 1.00    2353    3034
## sigma_Th_Intercept  -1.82      0.20  -2.23  -1.42 1.00    3038    3534
## Ho1_Intercept      -0.18      0.20  -0.58   0.22 1.00    2620    3357
## sigma_Ho1_Intercept -2.02      0.18  -2.38  -1.66 1.00    2908    3574
## Std_tuneHHe         0.03      0.01   0.01   0.05 1.00    6905    4670
## sigma_Std_tuneHHe   0.33      0.07   0.20   0.46 1.00   10187    4753
## Alt_tuneHHe         0.01      0.05  -0.08   0.11 1.00    3988    4333
## sigma_Alt_tuneHHe   0.27      0.06   0.15   0.40 1.00    7973    4962
## Ho2_tuneHHe         0.04      0.04  -0.03   0.12 1.00    4772    4382
## sigma_Ho2_tuneHHe   0.55      0.07   0.42   0.68 1.00    9311    4910
## In_tuneHHe          0.01      0.03  -0.04   0.07 1.00    3152    3648
## sigma_In_tuneHHe    0.61      0.05   0.51   0.71 1.00    4638    5286
## Sc_tuneHHe         -0.11      0.04  -0.19  -0.03 1.00    2868    3970
## sigma_Sc_tuneHHe    0.67      0.06   0.56   0.78 1.00    7130    5445
## Y_tuneHHe          -0.06      0.03  -0.11  -0.00 1.00    2983    3899
## sigma_Y_tuneHHe     0.62      0.05   0.53   0.71 1.00    5023    4959
## Be_tuneHHe         -0.09      0.09  -0.27   0.08 1.00    3900    3722
## sigma_Be_tuneHHe    0.78      0.06   0.66   0.90 1.00    8885    5410
## Co_tuneHHe         -0.05      0.05  -0.14   0.04 1.00    2804    3595
## sigma_Co_tuneHHe    0.63      0.04   0.55   0.72 1.00    6926    5328
## Th_tuneHHe          0.02      0.07  -0.11   0.16 1.00    2117    3480
## sigma_Th_tuneHHe    0.57      0.05   0.46   0.67 1.00    6026    5020
## Ho1_tuneHHe        -0.03      0.06  -0.14   0.08 1.00    2913    3660
## sigma_Ho1_tuneHHe   0.53      0.05   0.42   0.63 1.00    5263    4724
##
## Residual Correlations:
##           Estimate Est.Error 1-95% CI u-95% CI Rhat Bulk_ESS Tail_ESS
## rescor(Std,Alt)     0.73      0.03   0.67   0.78 1.00    5851    5287
## rescor(Std,Ho2)     0.67      0.03   0.60   0.73 1.00    5052    5524
## rescor(Alt,Ho2)     0.69      0.03   0.63   0.75 1.00    5396    5187
## rescor(Std,In)      0.62      0.04   0.55   0.69 1.00    3679    4260
## rescor(Alt,In)      0.63      0.04   0.55   0.69 1.00    3682    4338
## rescor(Ho2,In)      0.70      0.03   0.63   0.76 1.00    4367    4654
## rescor(Std,Sc)      0.59      0.04   0.51   0.66 1.00    4492    4685

```

```

## rescor(Alt,Sc)      0.60      0.04      0.51      0.67 1.00      4470      4696
## rescor(Ho2,Sc)     0.73      0.03      0.67      0.79 1.00      5067      4779
## rescor(In,Sc)      0.75      0.03      0.69      0.80 1.00      6573      5213
## rescor(Std,Y)      0.65      0.03      0.58      0.71 1.00      3723      4511
## rescor(Alt,Y)      0.66      0.04      0.59      0.72 1.00      3506      4384
## rescor(Ho2,Y)      0.76      0.03      0.70      0.81 1.00      4398      4777
## rescor(In,Y)       0.96      0.00      0.95      0.97 1.00      6389      5136
## rescor(Sc,Y)       0.86      0.02      0.82      0.89 1.00      6516      5237
## rescor(Std,Be)     0.47      0.05      0.38      0.56 1.00      4344      4661
## rescor(Alt,Be)     0.47      0.05      0.37      0.56 1.00      4765      5164
## rescor(Ho2,Be)     0.56      0.04      0.47      0.63 1.00      4735      4790
## rescor(In,Be)      0.64      0.04      0.56      0.71 1.00      5659      5329
## rescor(Sc,Be)      0.62      0.04      0.53      0.70 1.00      4082      4769
## rescor(Y,Be)       0.65      0.04      0.58      0.72 1.00      4899      4905
## rescor(Std,Co)     0.62      0.04      0.55      0.69 1.00      3772      4196
## rescor(Alt,Co)     0.64      0.04      0.56      0.70 1.00      3720      4298
## rescor(Ho2,Co)     0.75      0.03      0.70      0.80 1.00      4098      4419
## rescor(In,Co)      0.87      0.02      0.84      0.90 1.00      5771      4653
## rescor(Sc,Co)      0.82      0.02      0.78      0.87 1.00      3817      4688
## rescor(Y,Co)       0.90      0.01      0.88      0.92 1.00      4565      4533
## rescor(Be,Co)      0.86      0.02      0.83      0.89 1.00      6113      5223
## rescor(Std,Th)     0.39      0.05      0.29      0.48 1.00      4019      5015
## rescor(Alt,Th)     0.40      0.05      0.29      0.49 1.00      4455      4342
## rescor(Ho2,Th)     0.39      0.05      0.29      0.49 1.00      4591      4468
## rescor(In,Th)      0.81      0.02      0.77      0.85 1.00      5820      4889
## rescor(Sc,Th)      0.36      0.05      0.25      0.46 1.00      4966      4828
## rescor(Y,Th)       0.69      0.03      0.63      0.75 1.00      5480      4857
## rescor(Be,Th)      0.64      0.03      0.57      0.71 1.00      8038      5227
## rescor(Co,Th)      0.71      0.03      0.65      0.77 1.00      7804      5329
## rescor(Std,Ho1)    0.47      0.05      0.37      0.56 1.00      3925      5261
## rescor(Alt,Ho1)    0.48      0.05      0.38      0.56 1.00      4600      5181
## rescor(Ho2,Ho1)    0.41      0.05      0.31      0.51 1.00      4881      4391
## rescor(In,Ho1)     0.82      0.02      0.77      0.86 1.00      5553      4986
## rescor(Sc,Ho1)     0.35      0.05      0.24      0.45 1.00      4986      5042
## rescor(Y,Ho1)      0.70      0.03      0.63      0.76 1.00      5457      5043
## rescor(Be,Ho1)     0.60      0.04      0.52      0.67 1.00      8190      5253
## rescor(Co,Ho1)     0.69      0.03      0.63      0.75 1.00      7823      5297
## rescor(Th,Ho1)    0.97      0.00      0.97      0.98 1.00      6505      5365

```

```

##
## Draws were sampled using sampling(NUTS). For each parameter, Bulk_ESS
## and Tail_ESS are effective sample size measures, and Rhat is the potential
## scale reduction factor on split chains (at convergence, Rhat = 1).

```

Again, the HMC sampling looks to have gone well.

## Model checks

Next, the density checks.

Density overlay

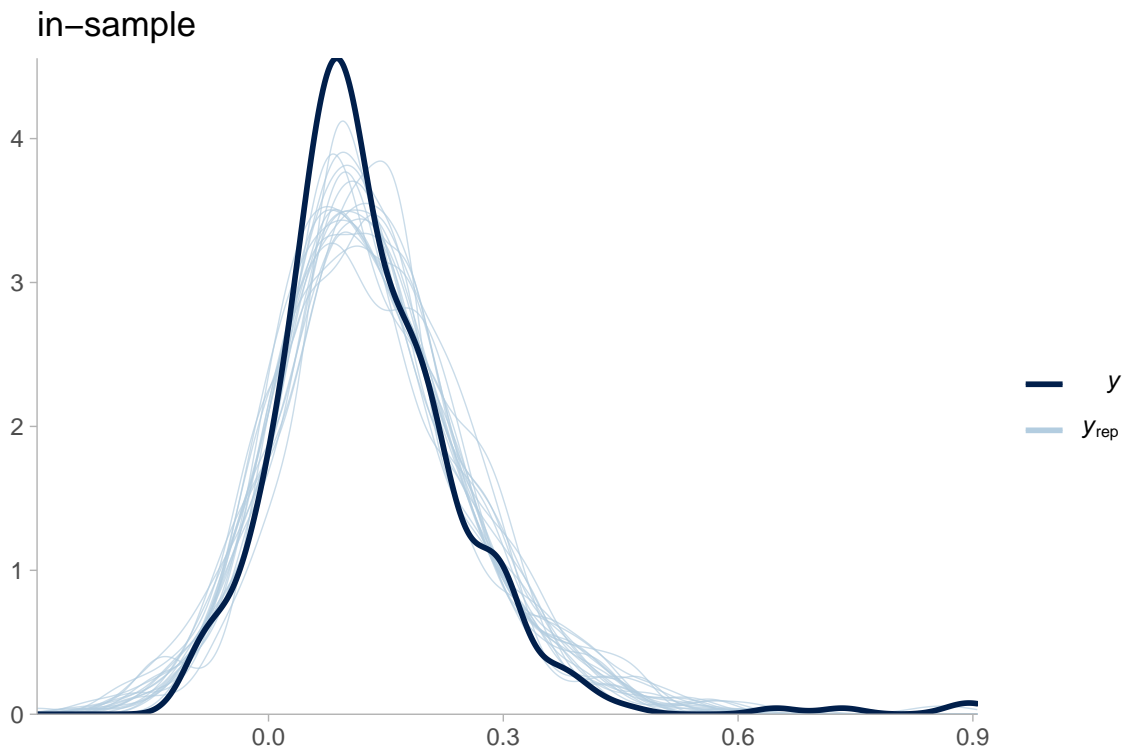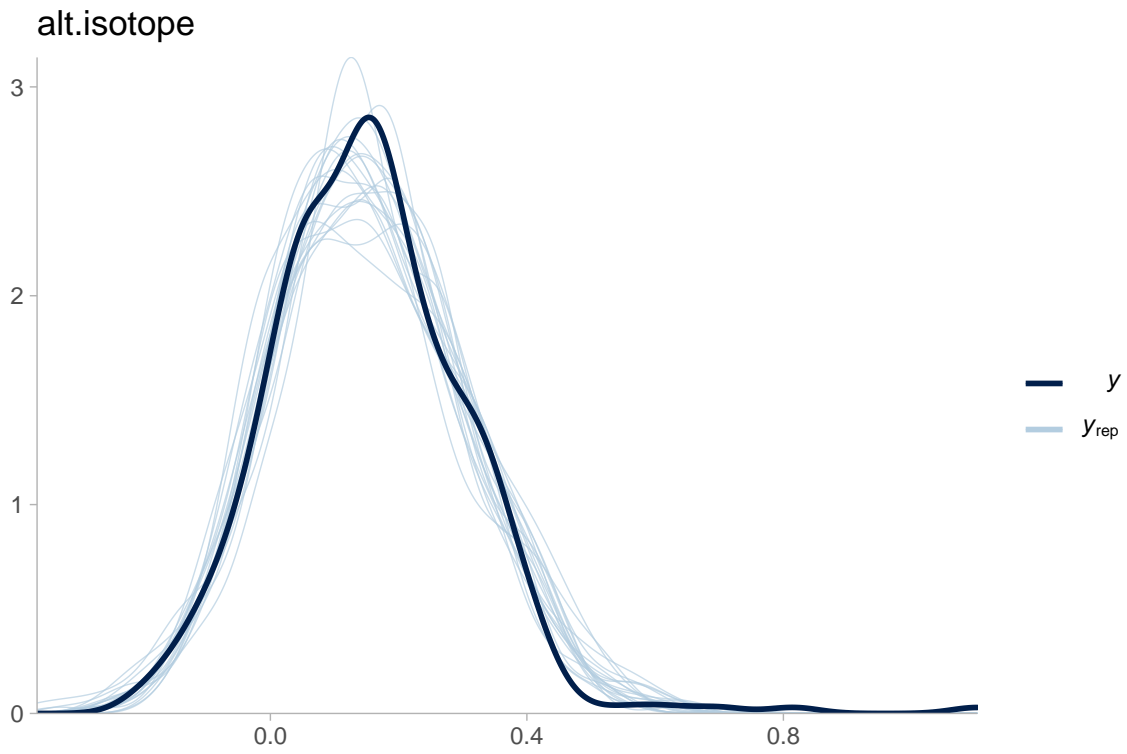



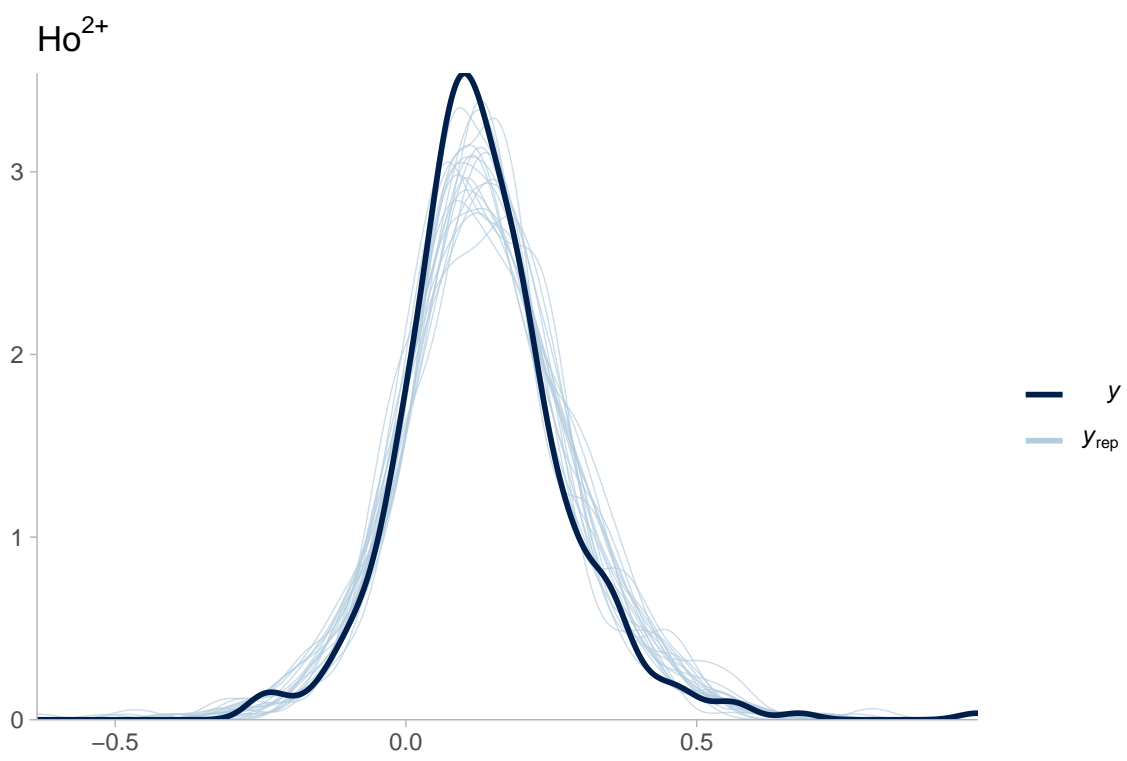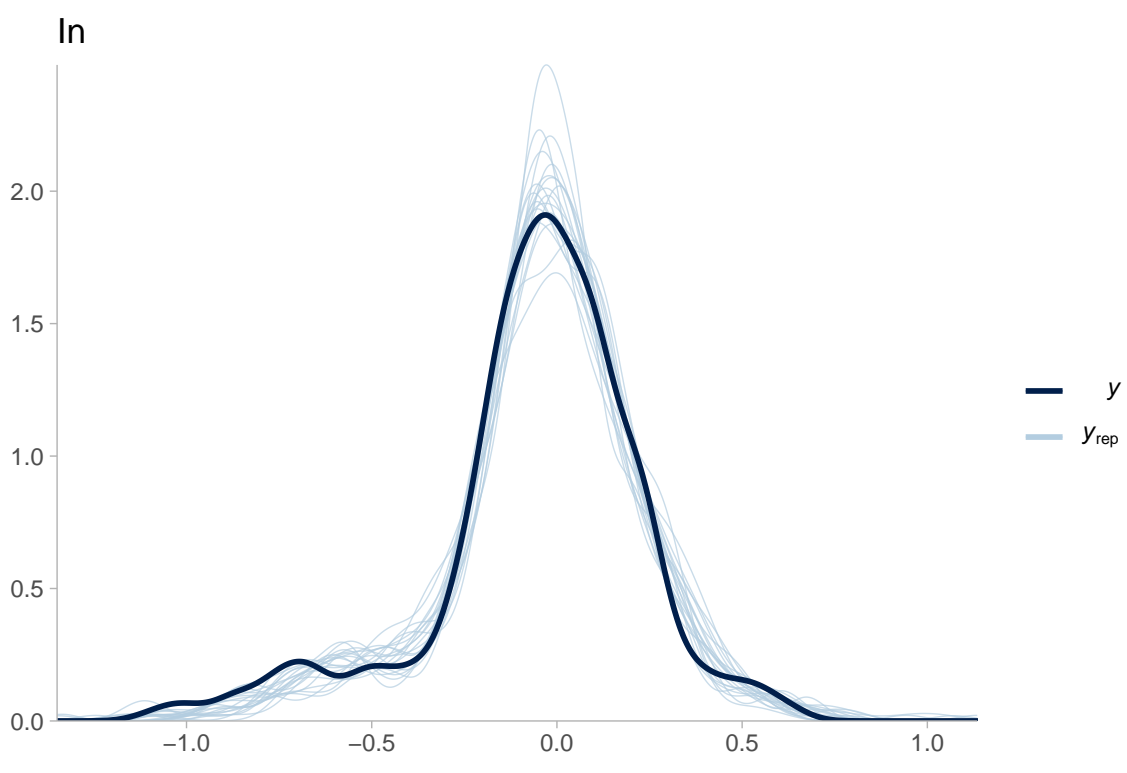

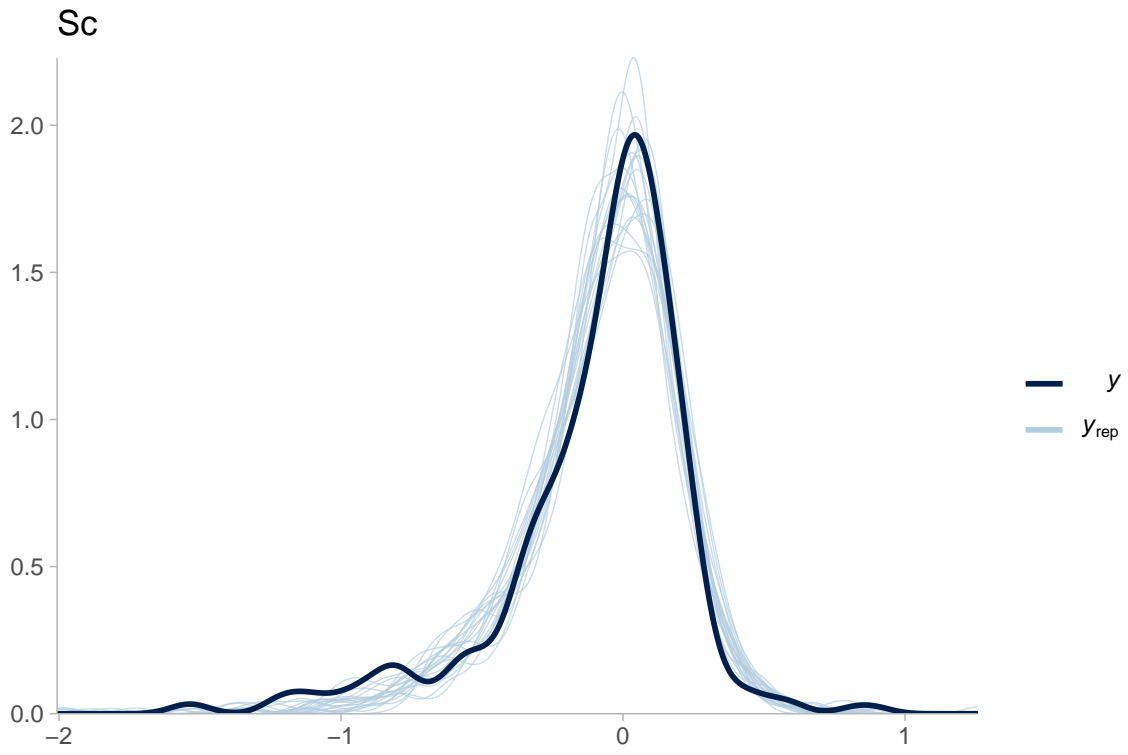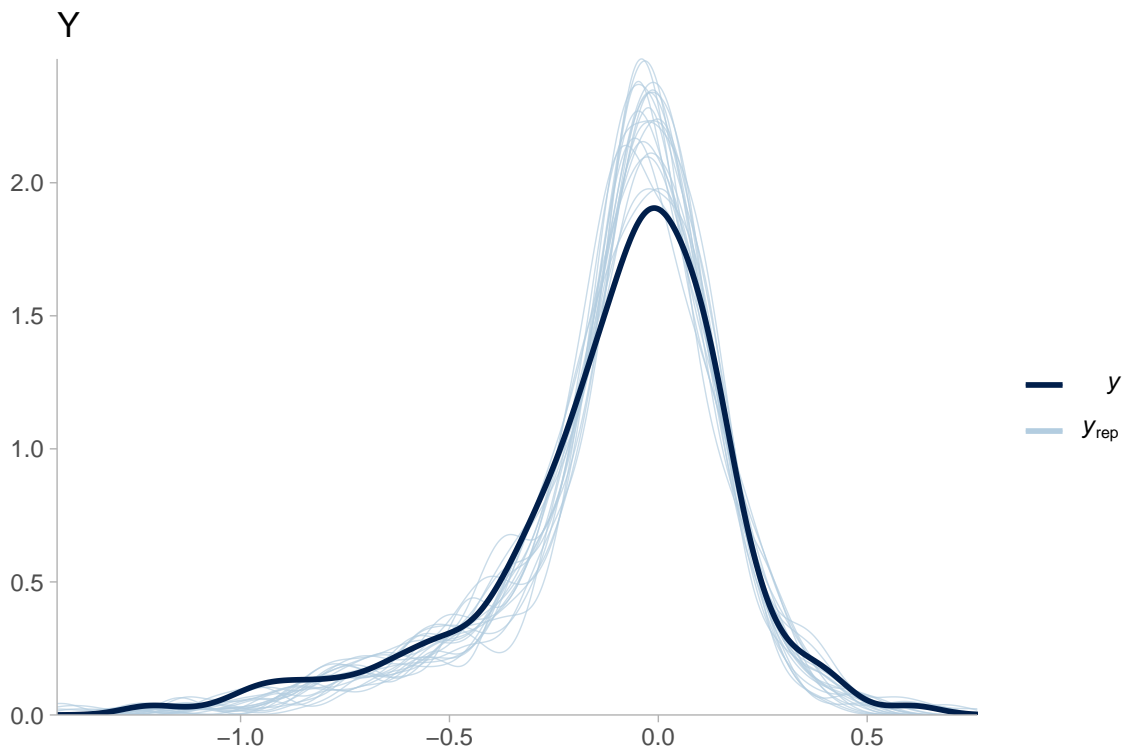

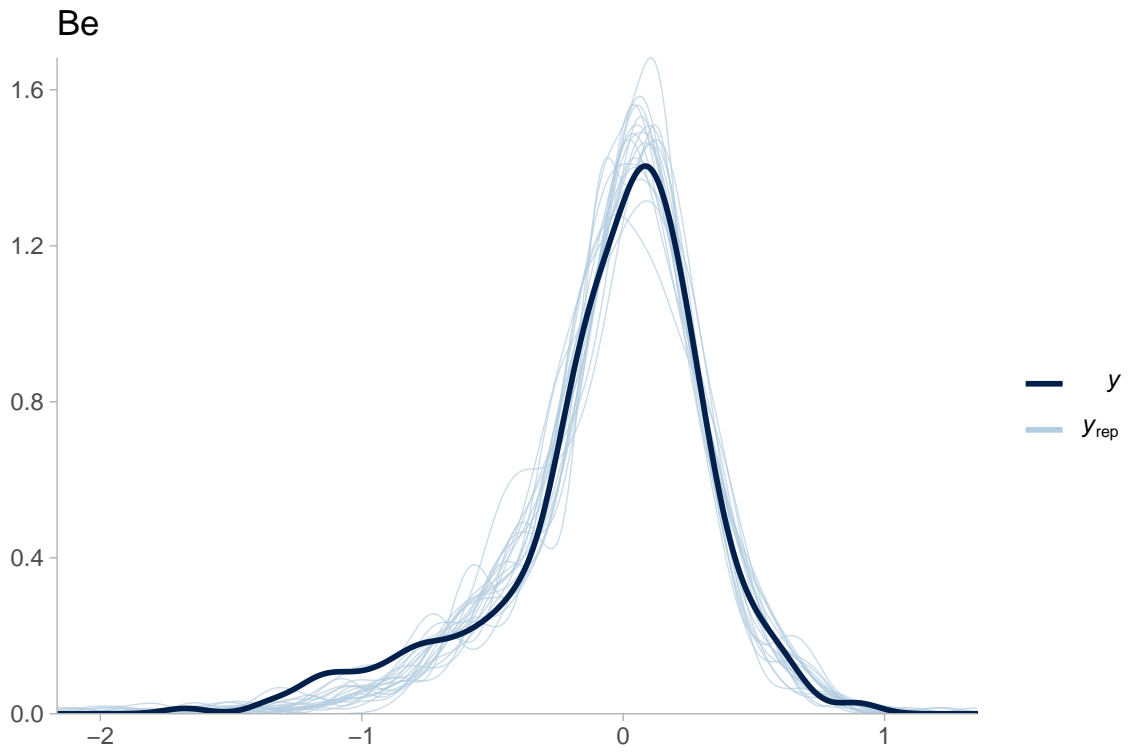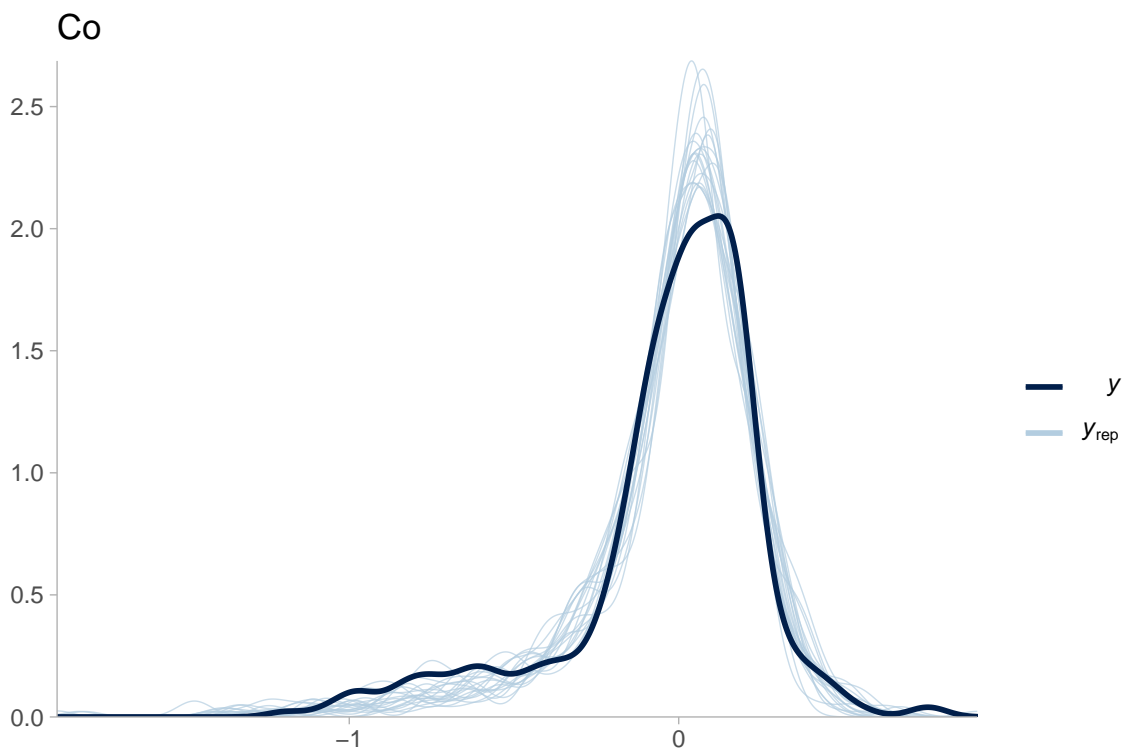

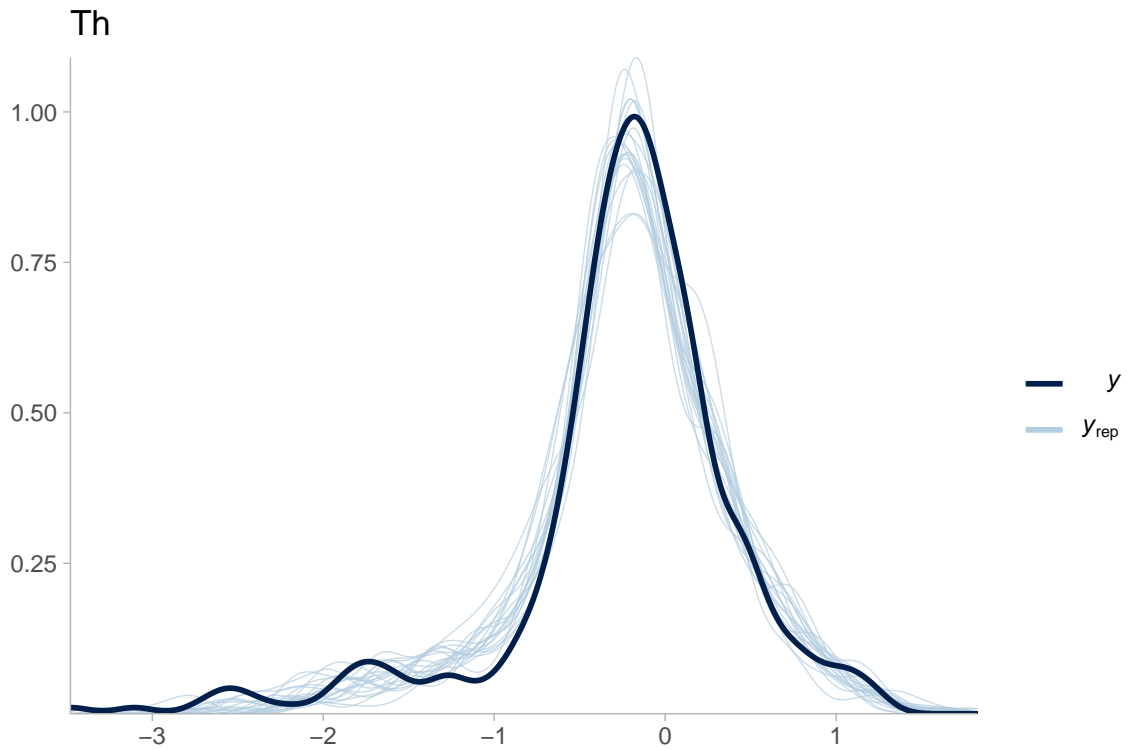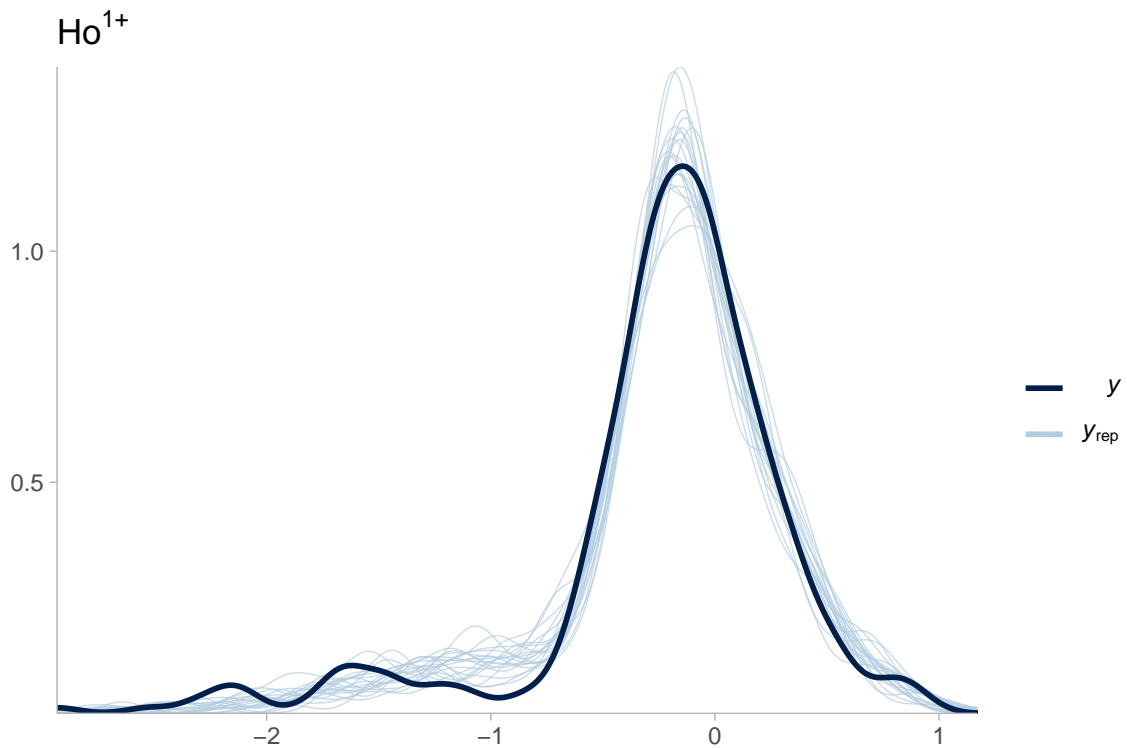

These checks suggest an improvement on the previous models. The check looks reasonable across most of the methods, though clearly the in-sample observations again proved more difficult to replicate. It can be helpful to look at some additional checks (below) to get a better handle on which aspects of the observed data are reasonably approximated by the model and which may not be.

## Median

Next is a check comparing replicated medians to the observed medians.

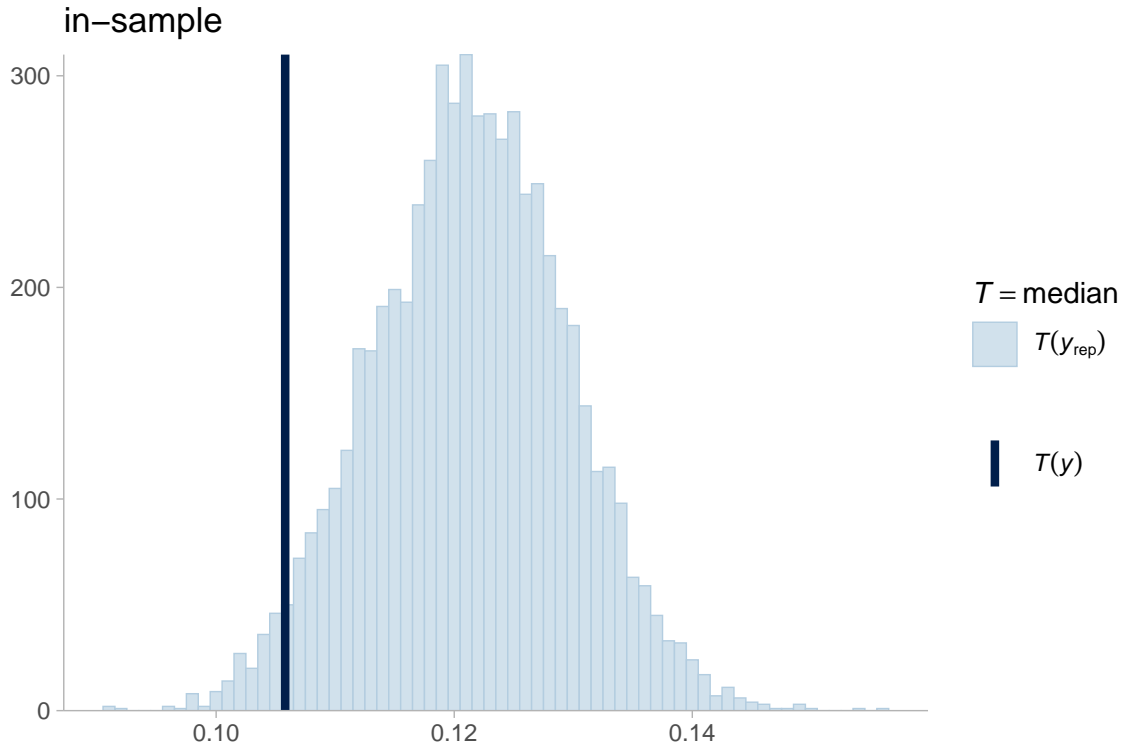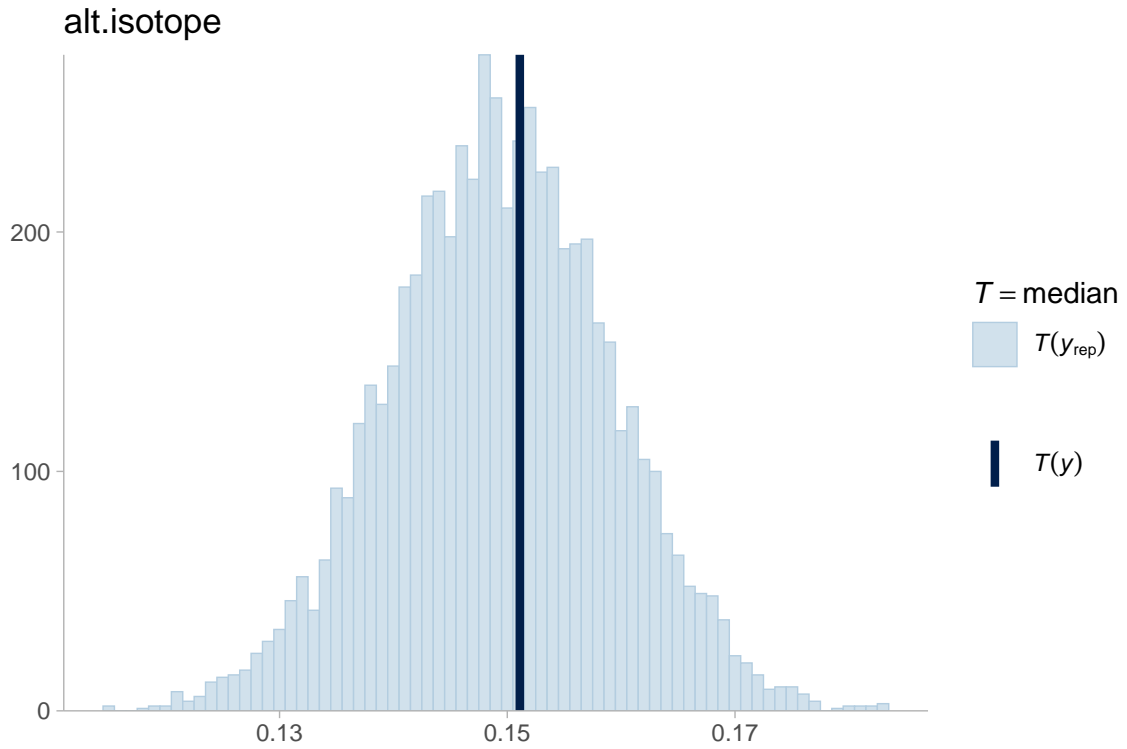

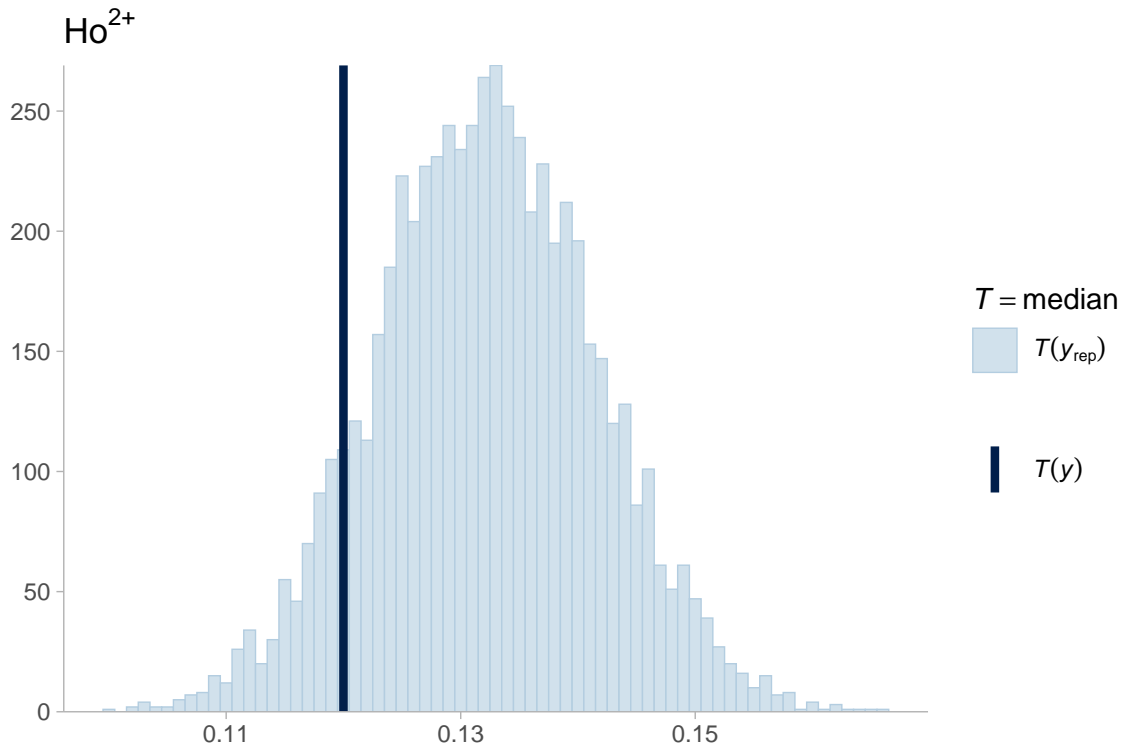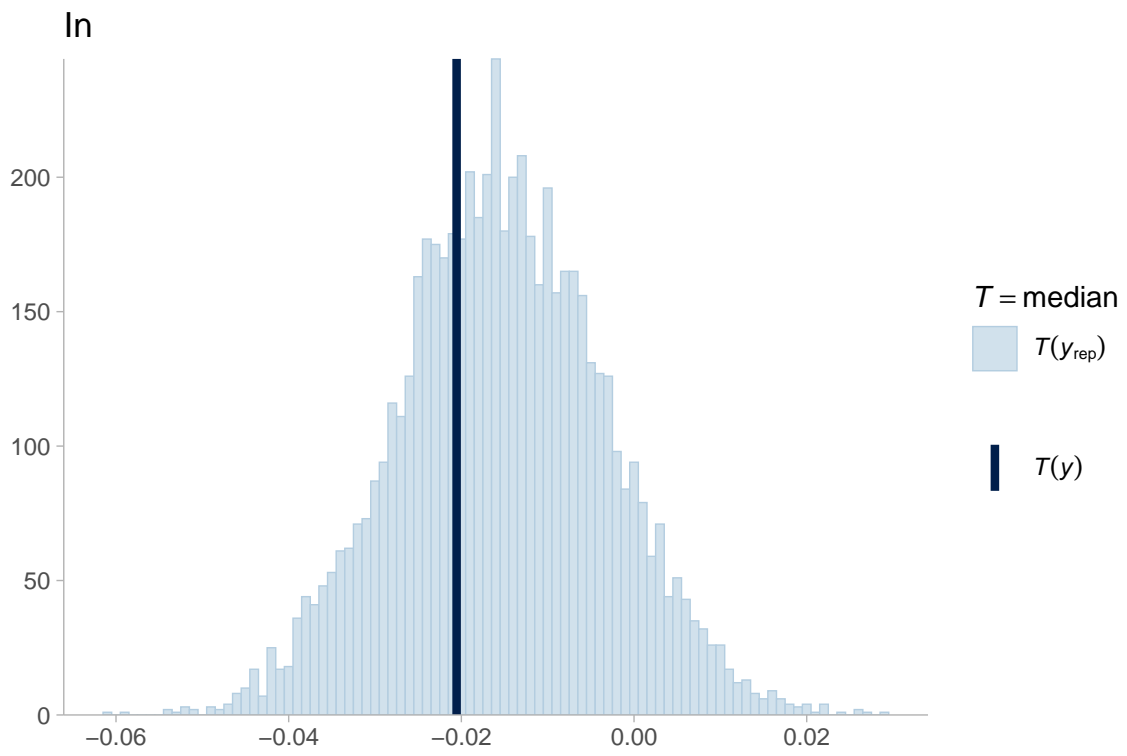

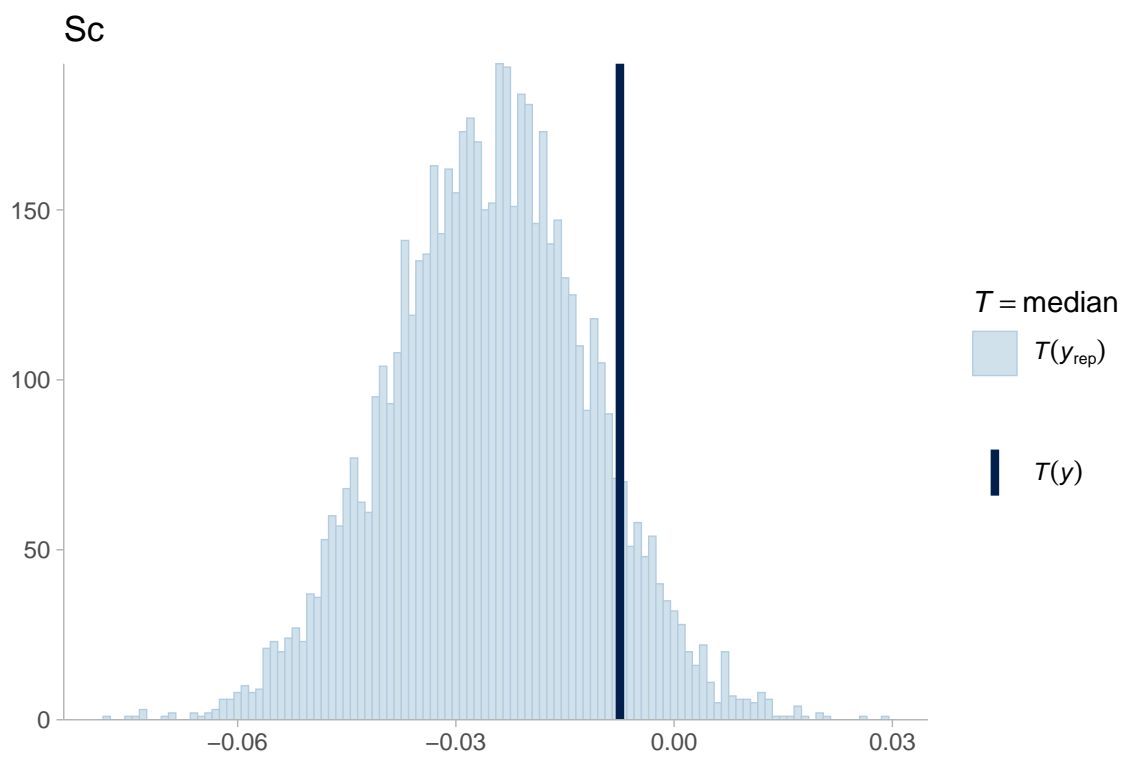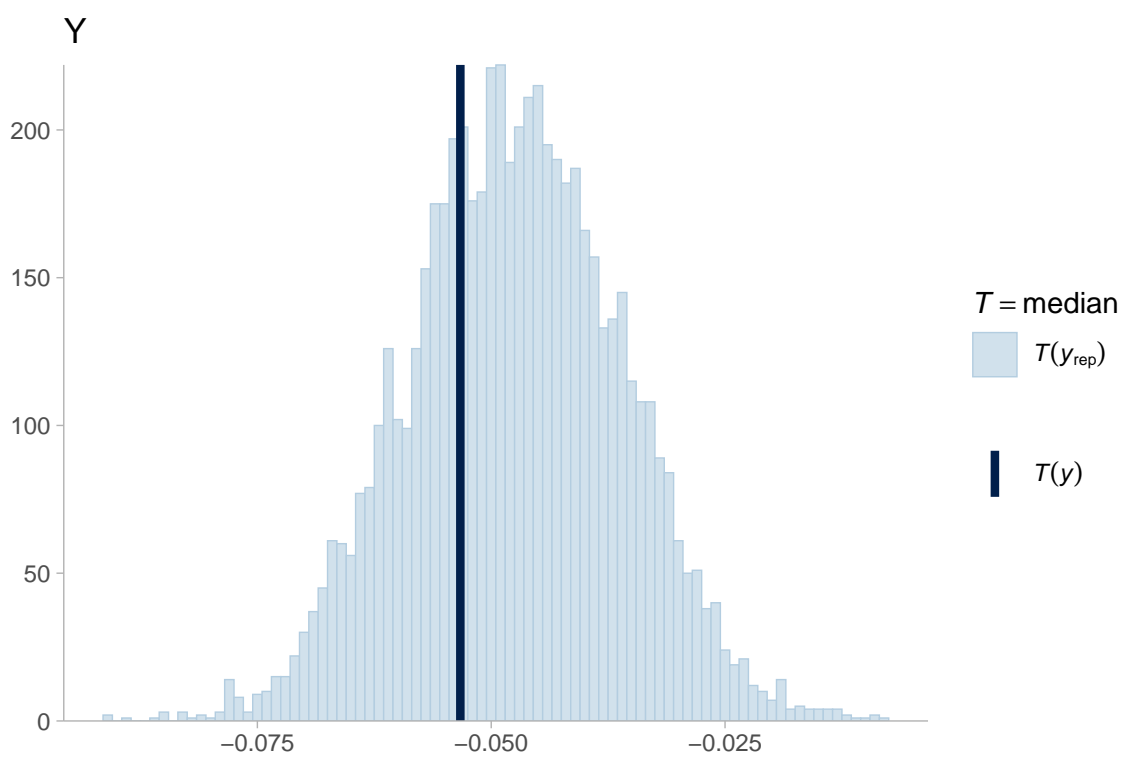

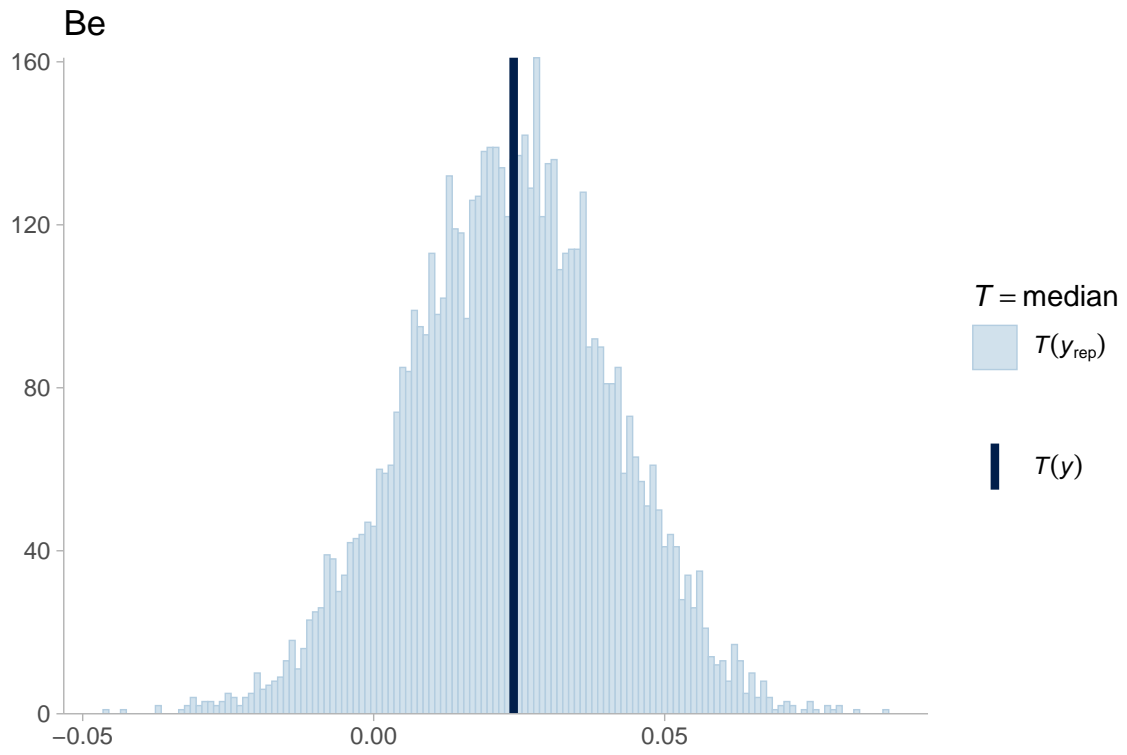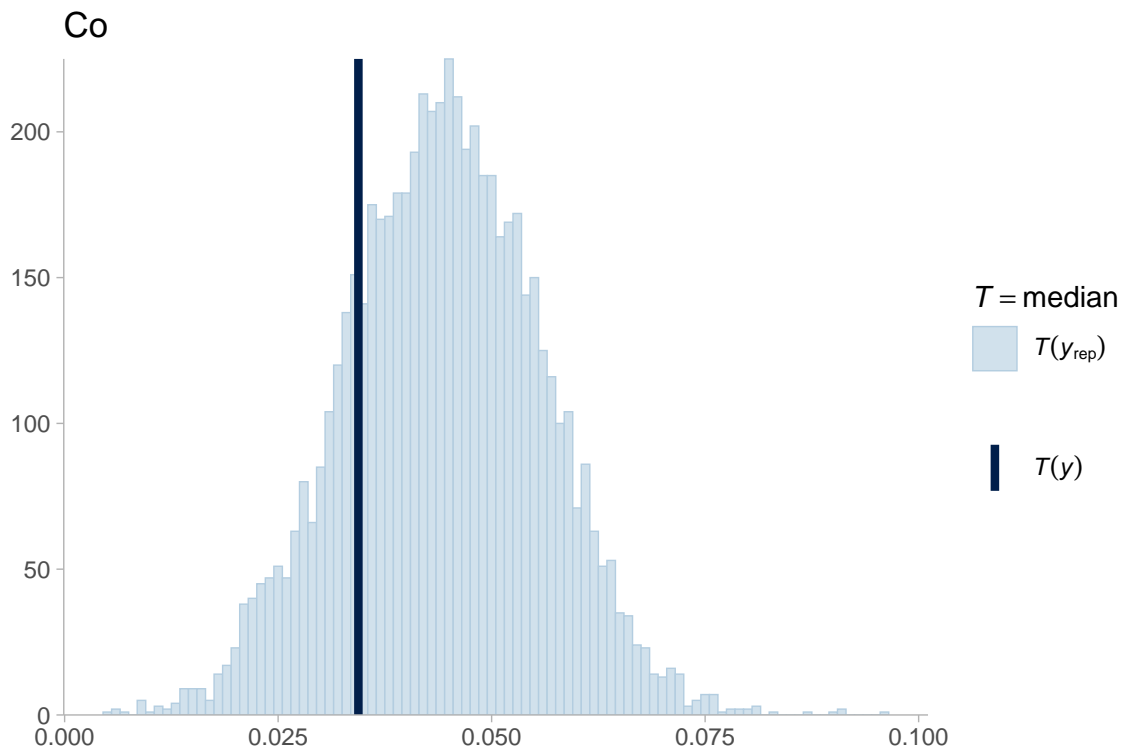



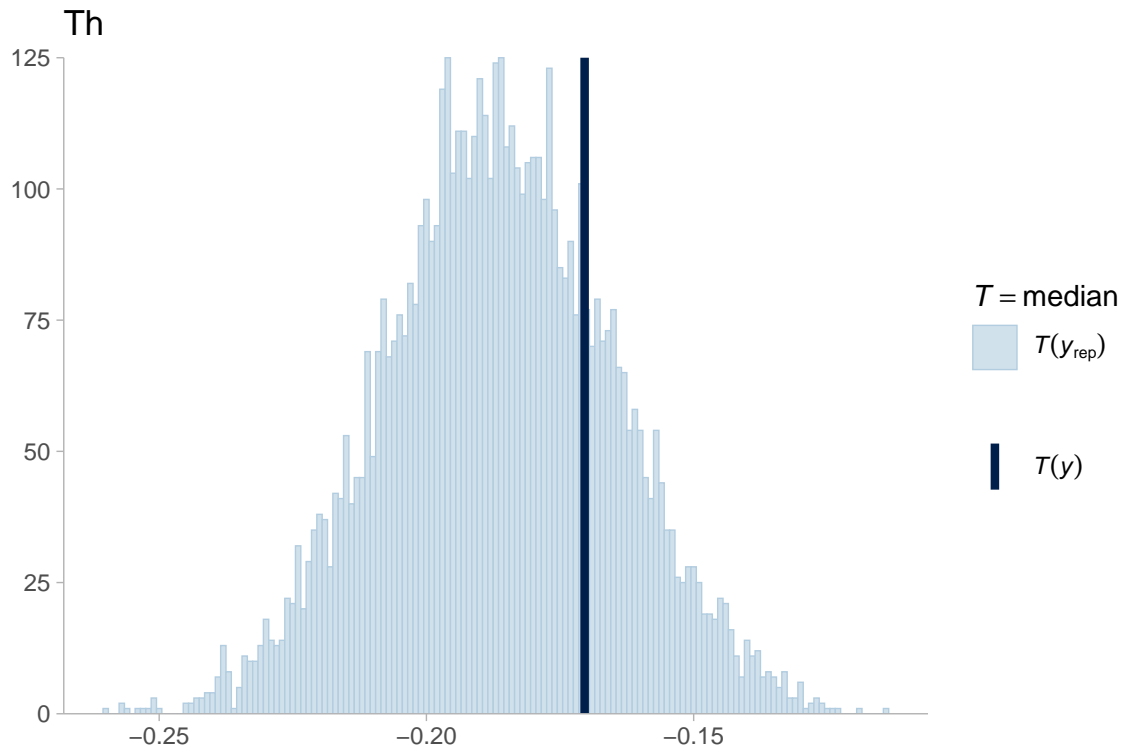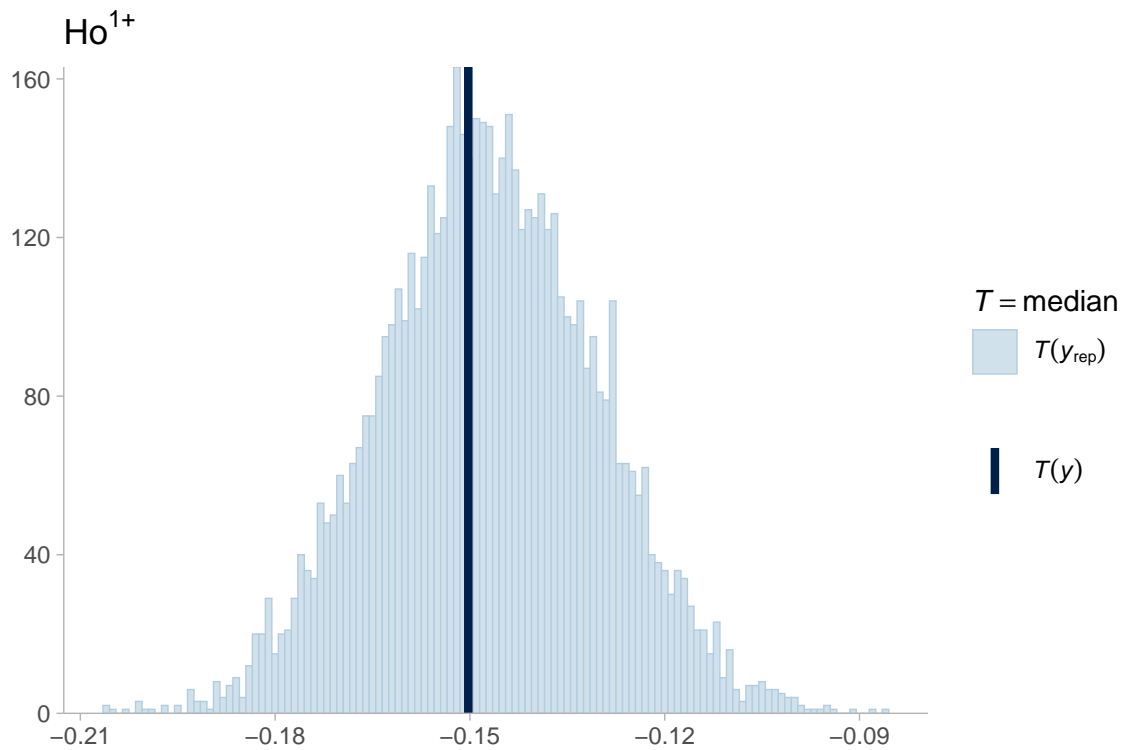

In the above check, the observed median (black vertical line) should fall in the bulk of the replicated medians (blue histogram). The plot for the in-sample suggests that the model may be consistently overestimating the observed median for that method. This would agree with the density plot for the in-sample method above. The scale of the bias is on the order of around 100 ppt, which may be less meaningful in the practical sense.

## Min

Next is a check comparing replicated mins to the observed mins.

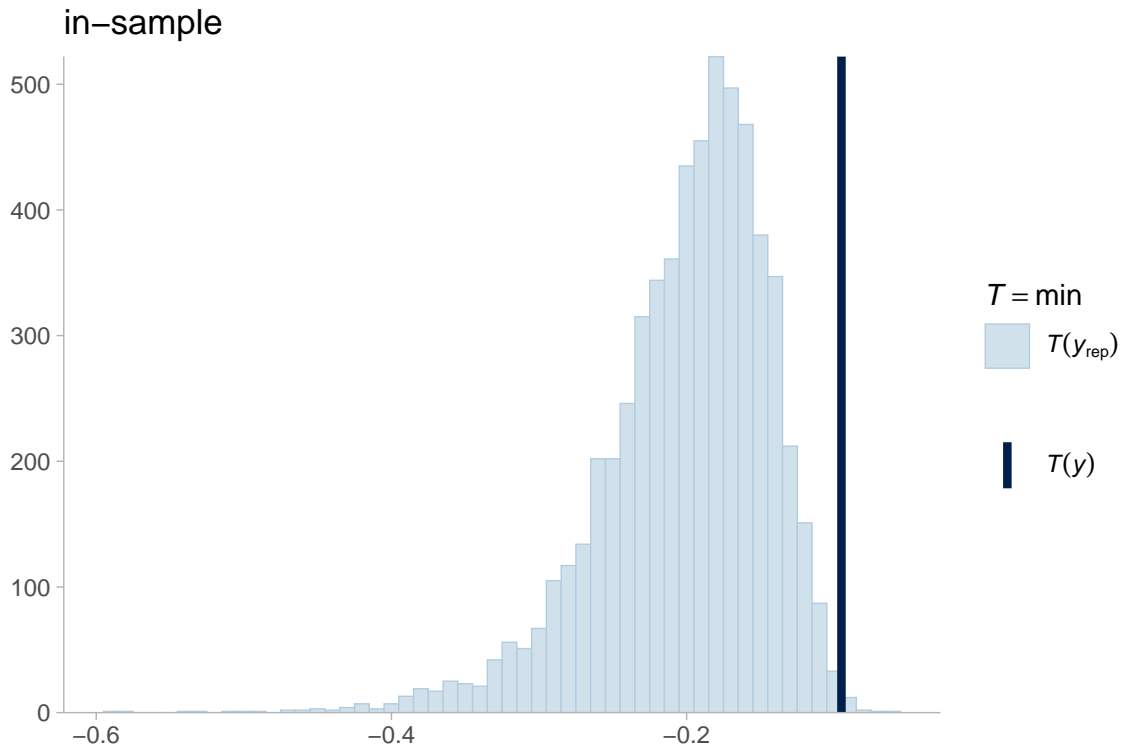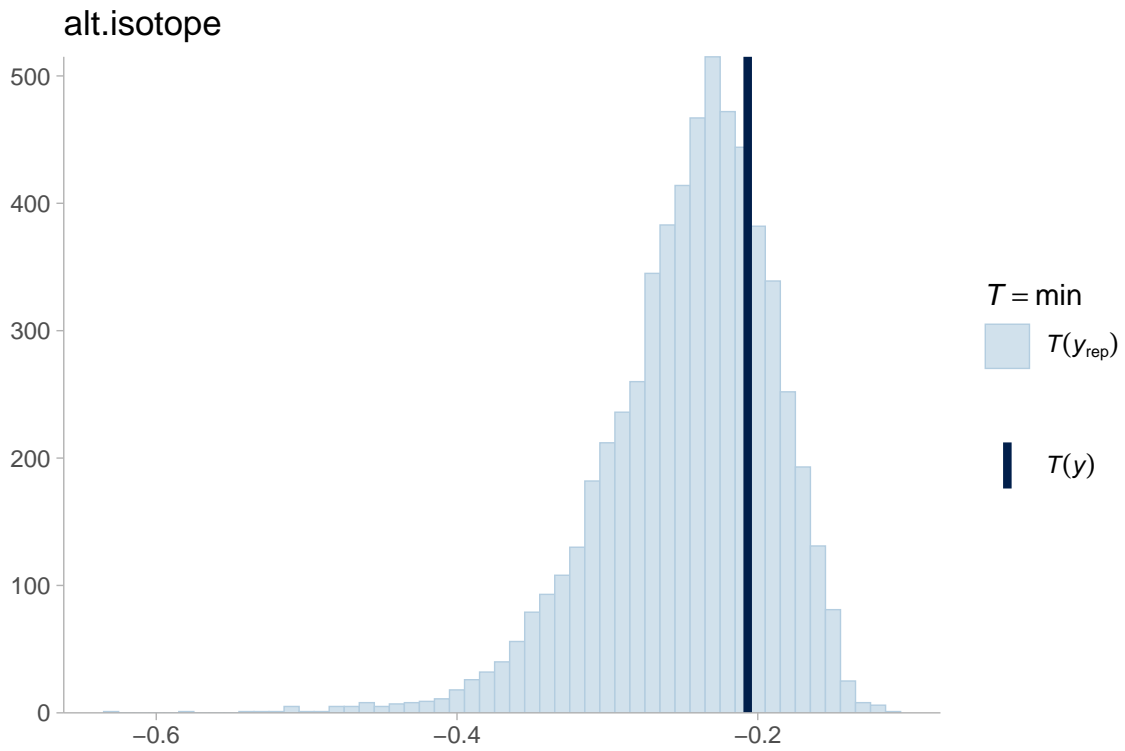

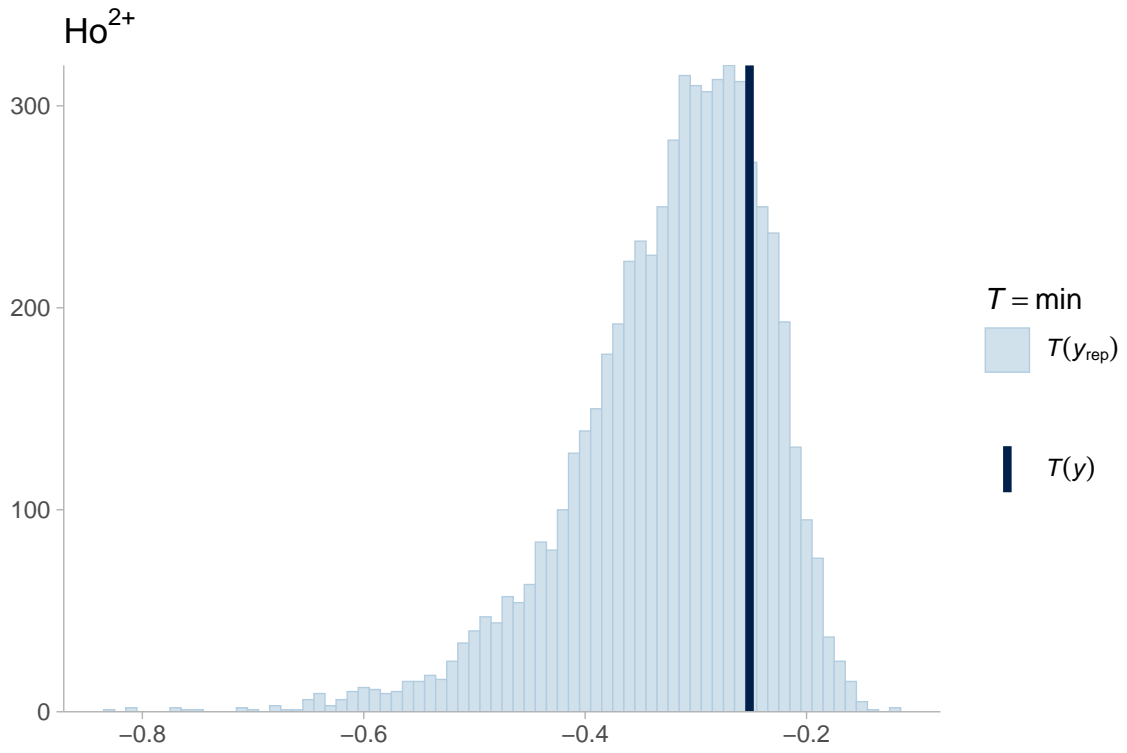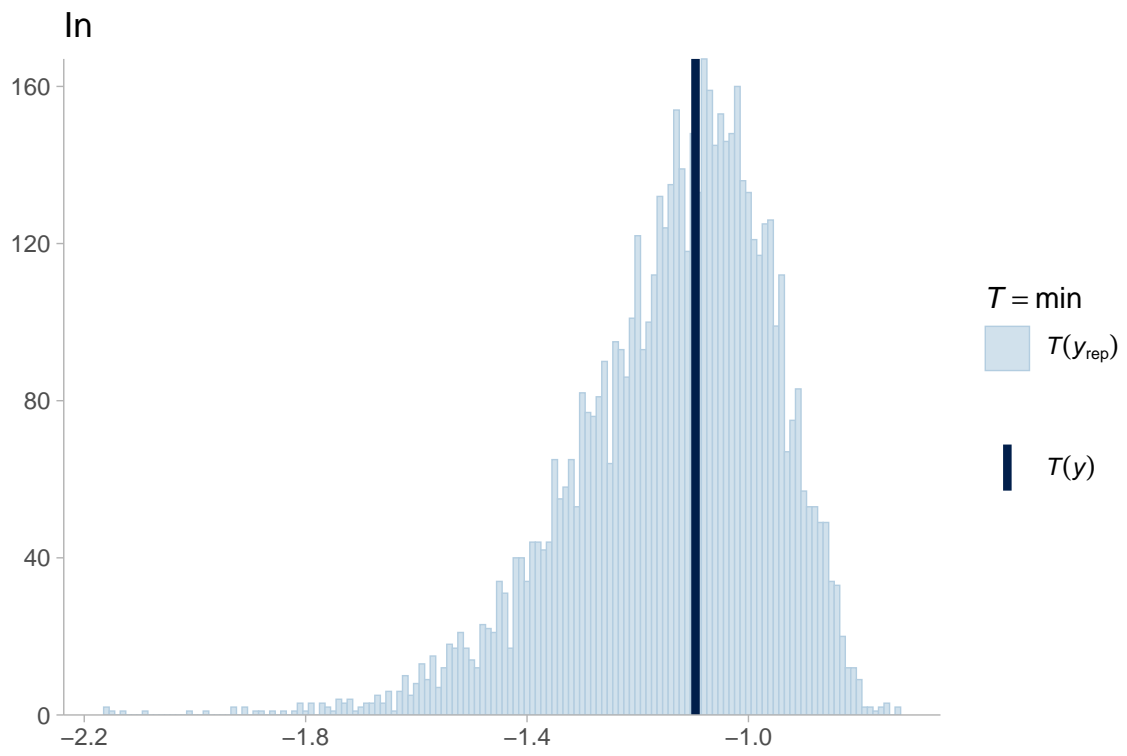

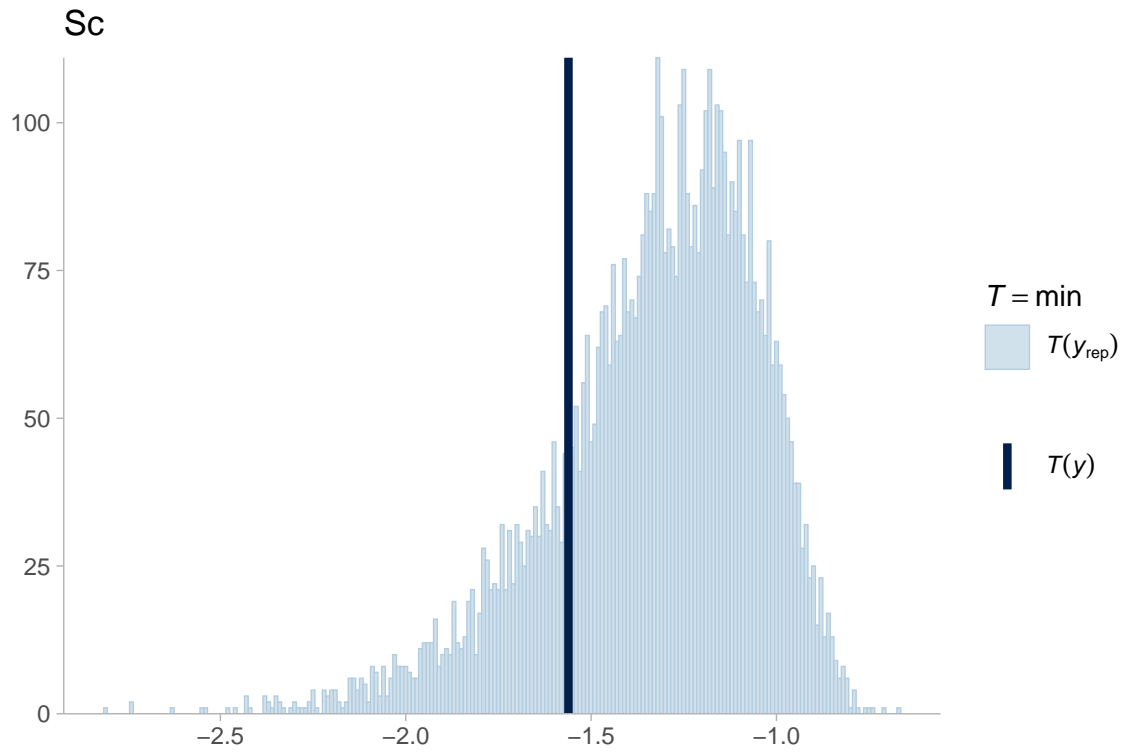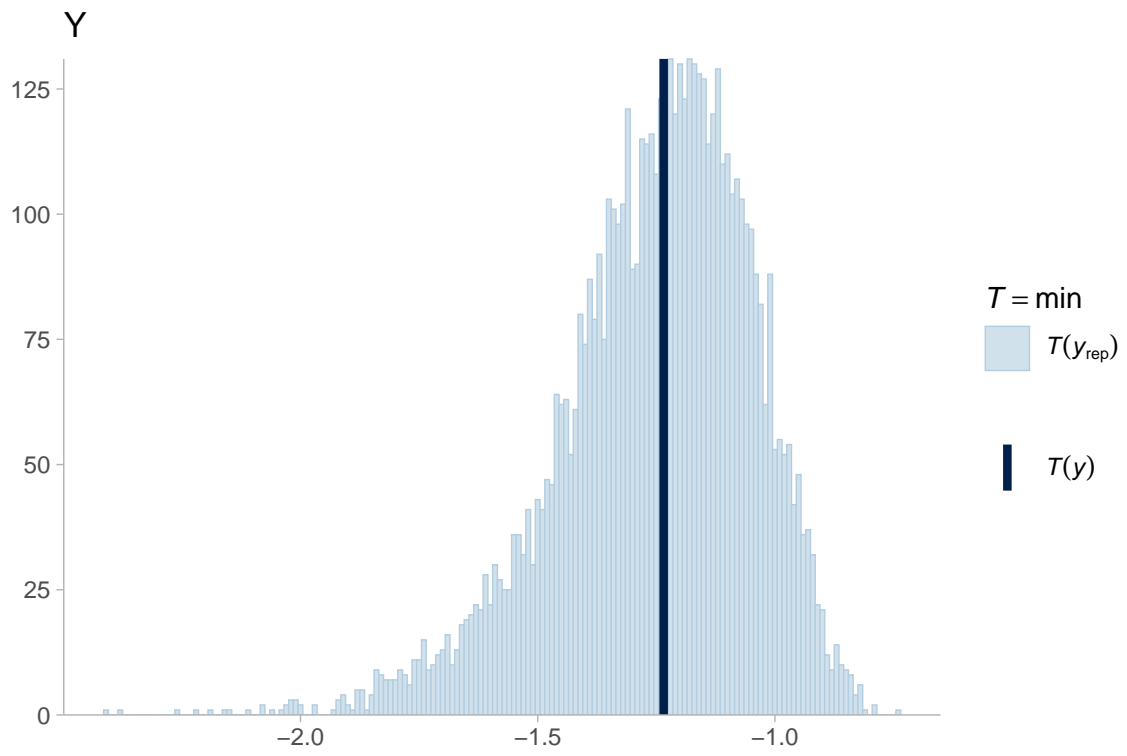

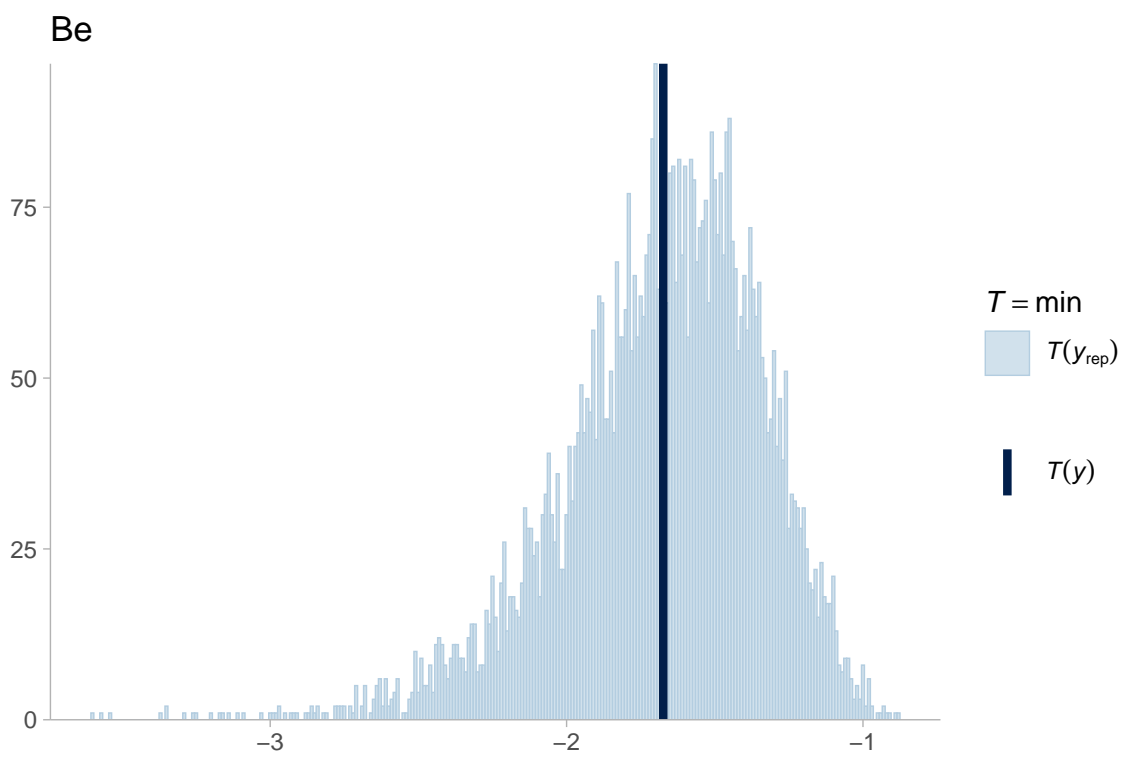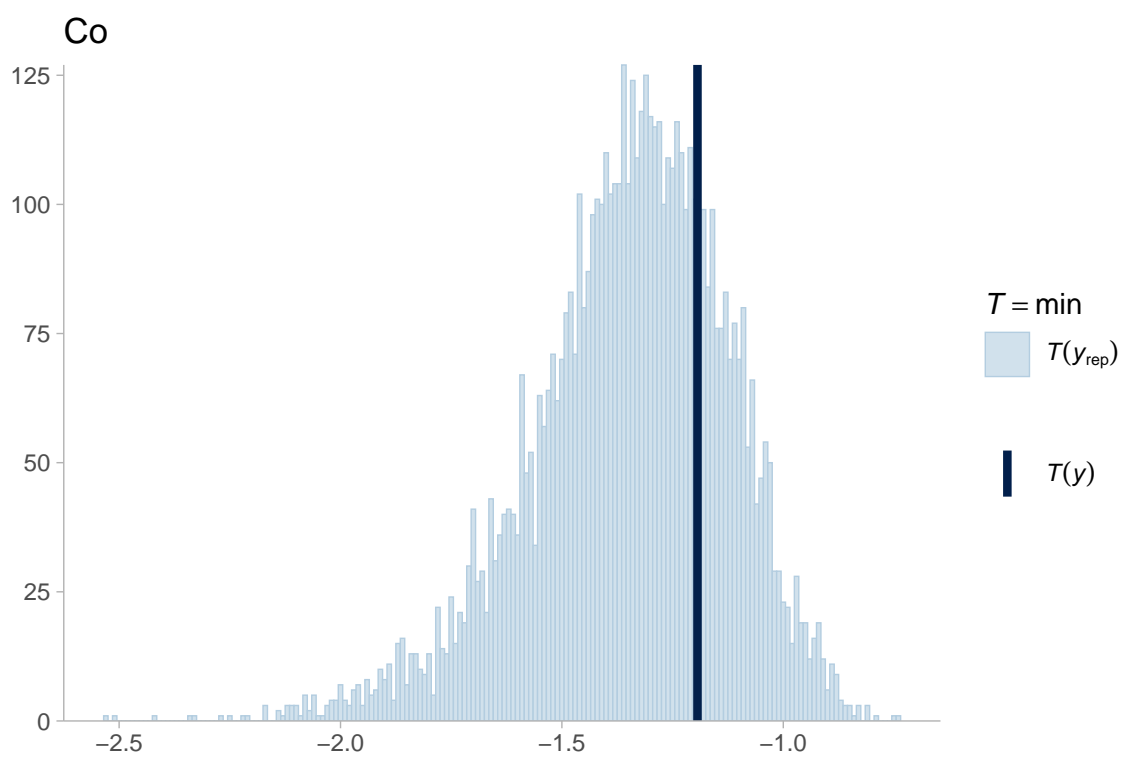

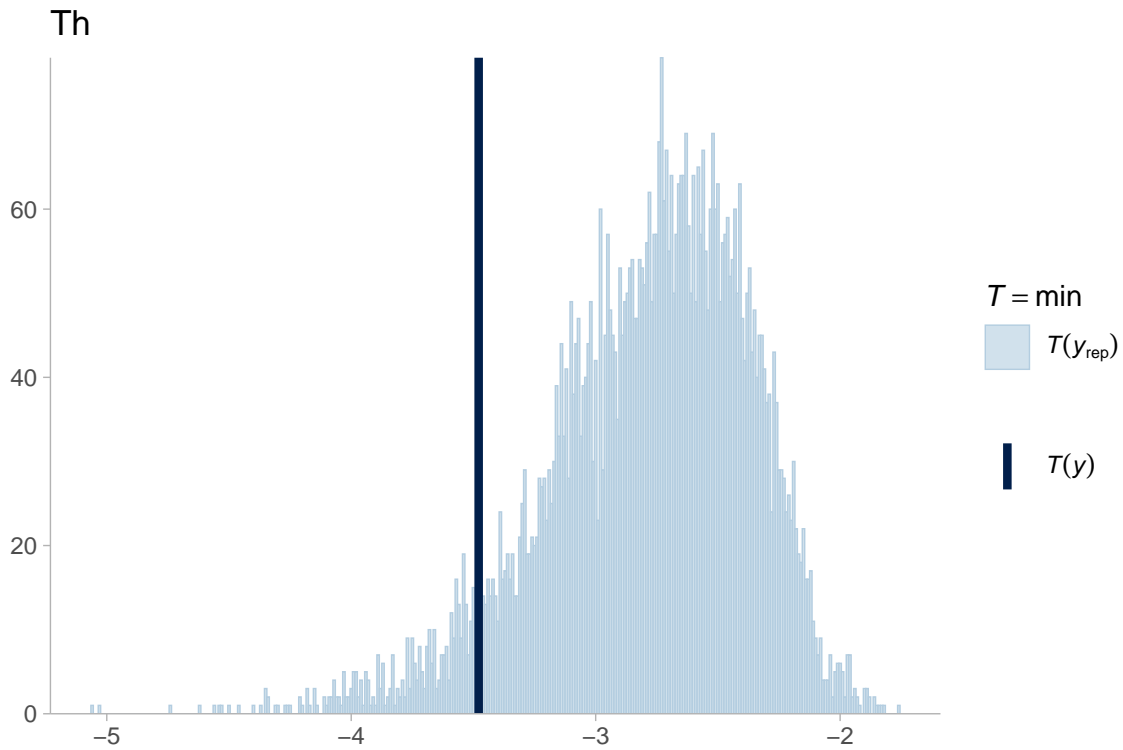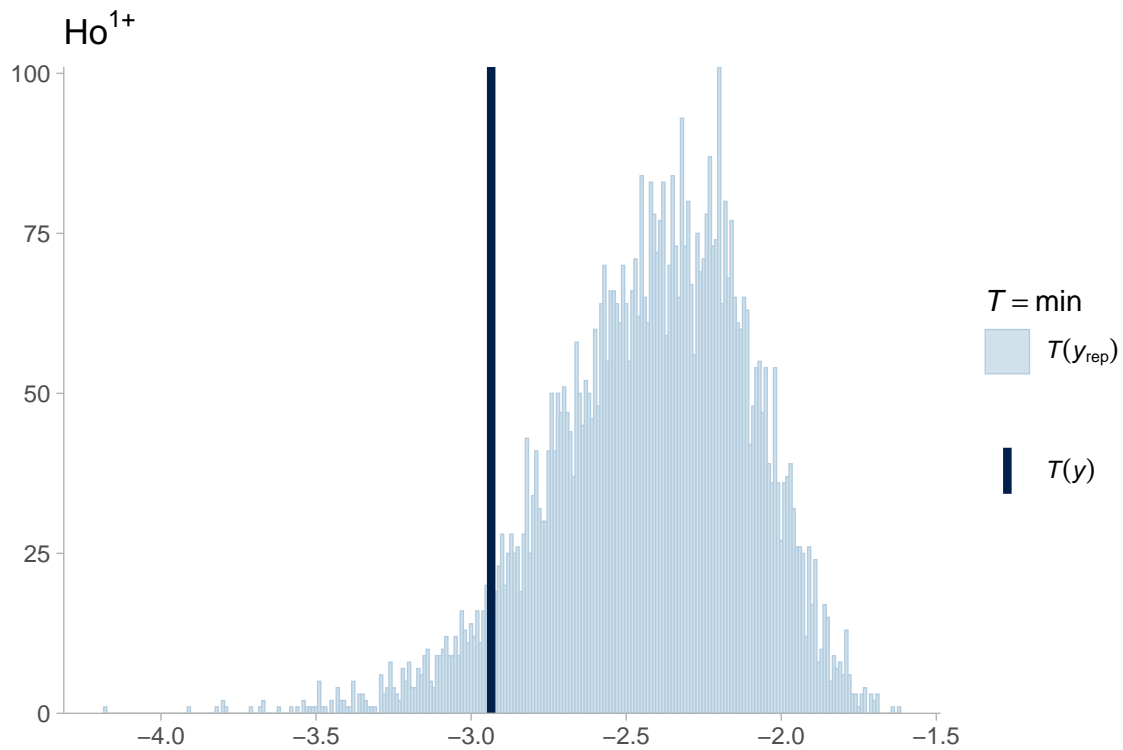

The model is consistently “over-shooting” the min for the in-sample method. This would also agree with the density plot above, where the left tails of the replicated datasets consistently are left of the observed density, if only slightly. On the other hand, the model may be somewhat under-estimating the left tails for  $Th$  and  $Ho^{1+}$  on average.

## Max

Next is a check comparing replicated maxs to the observed maxs.

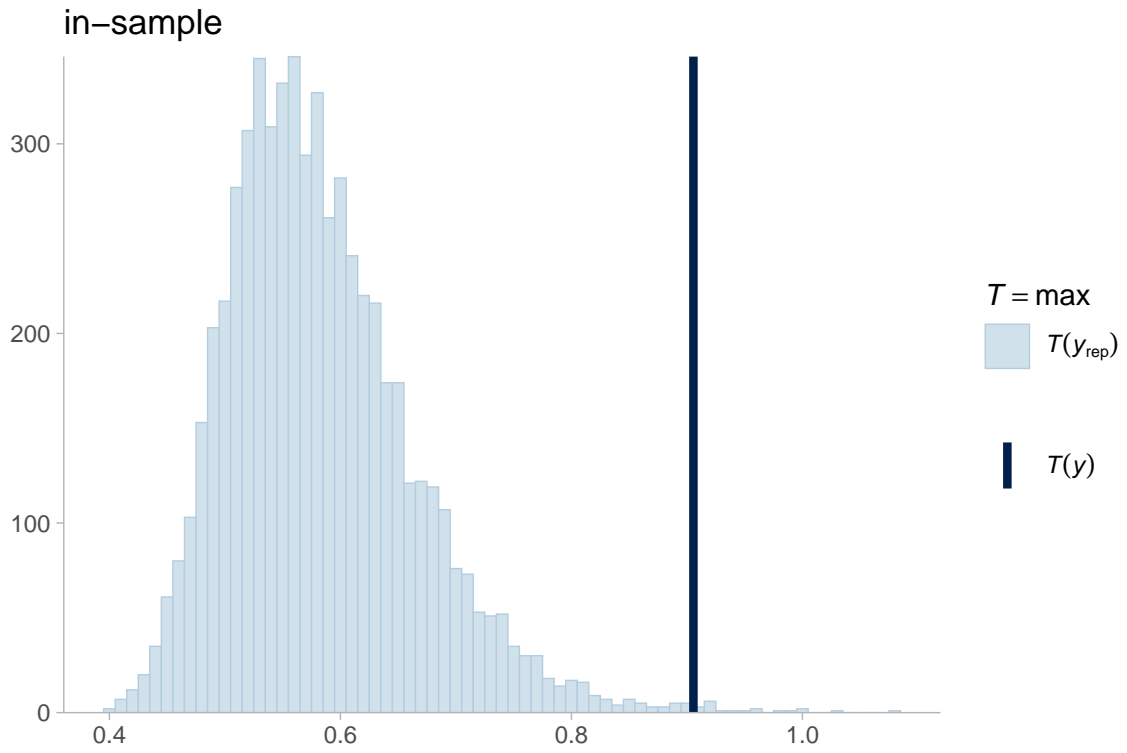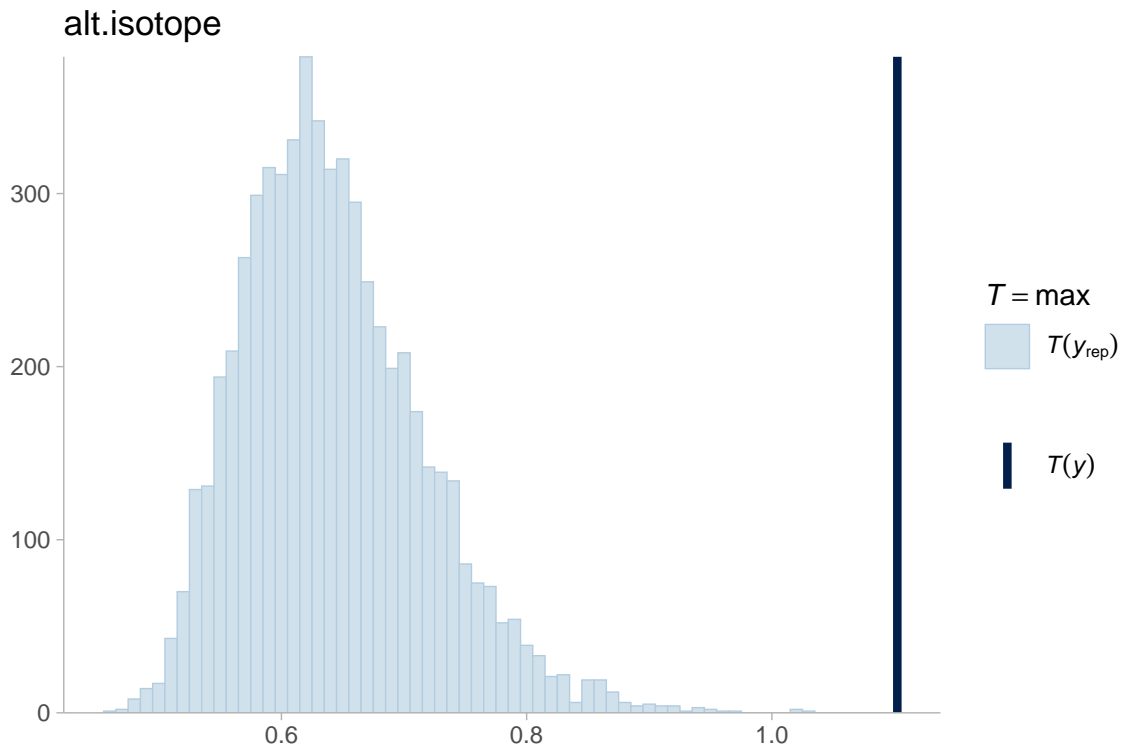

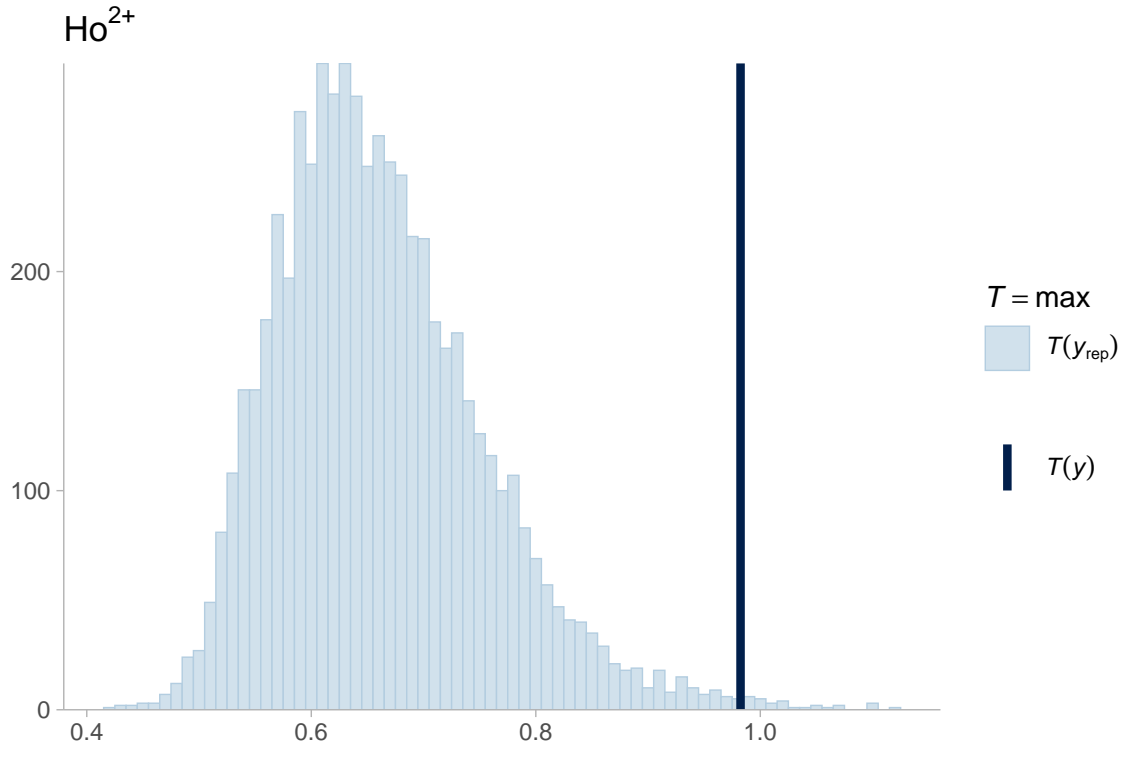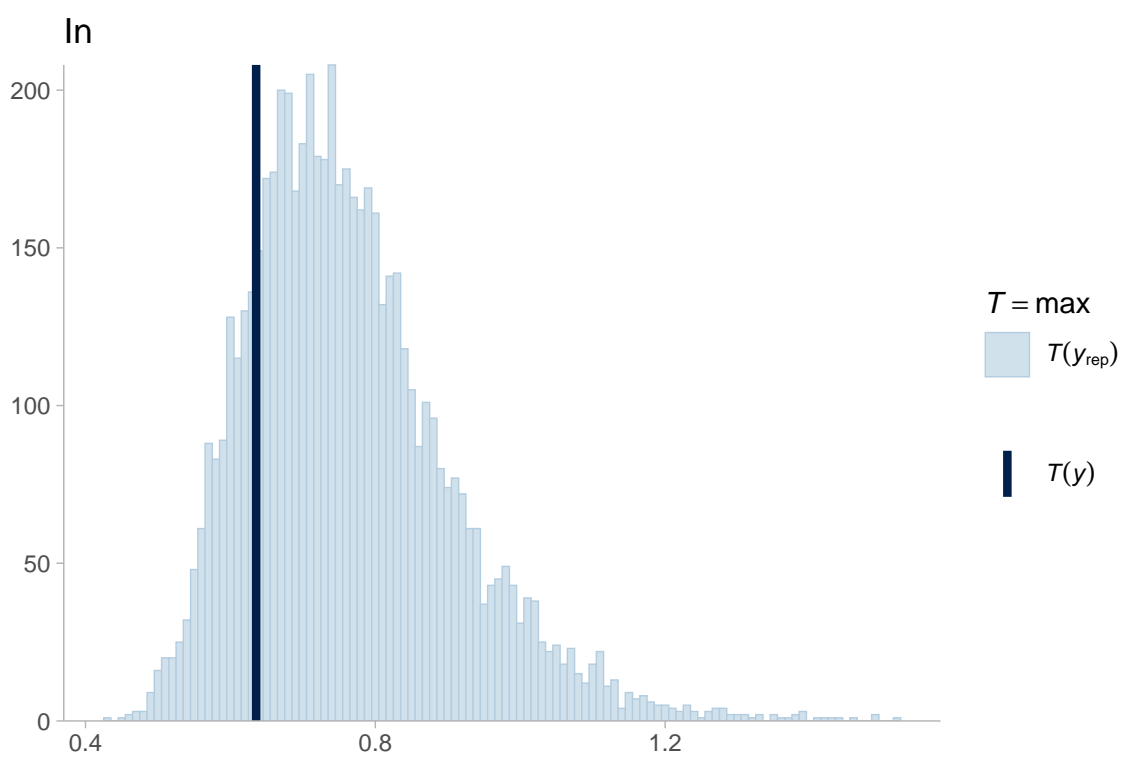



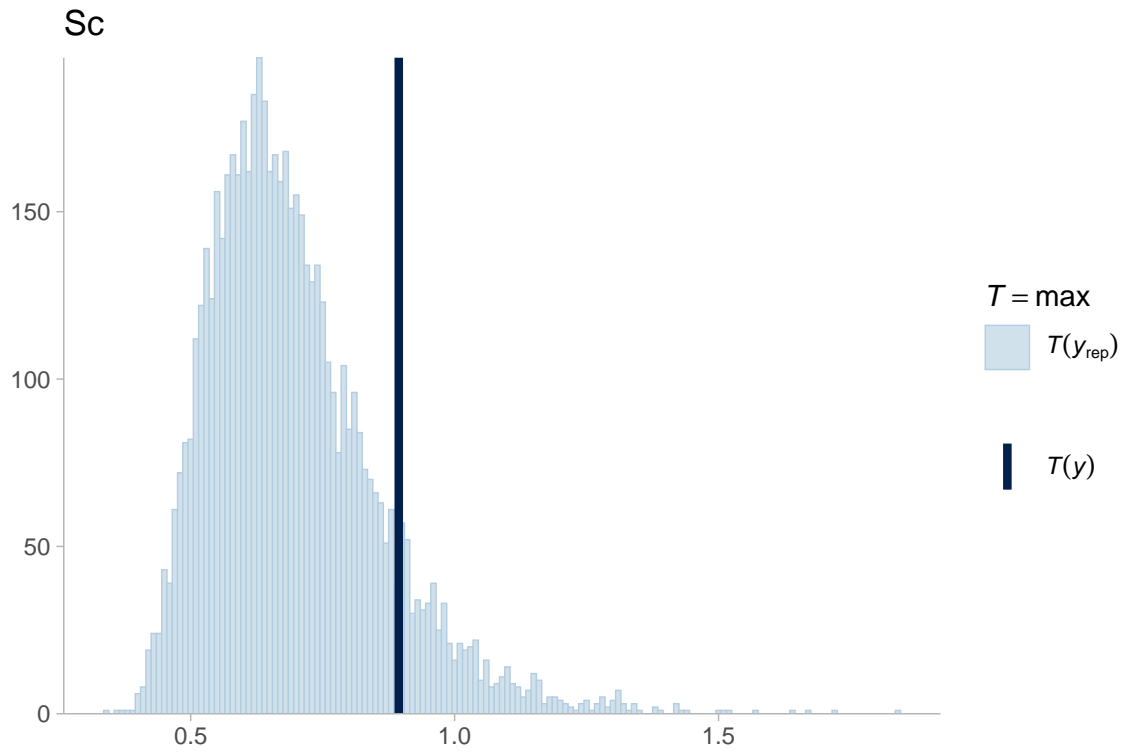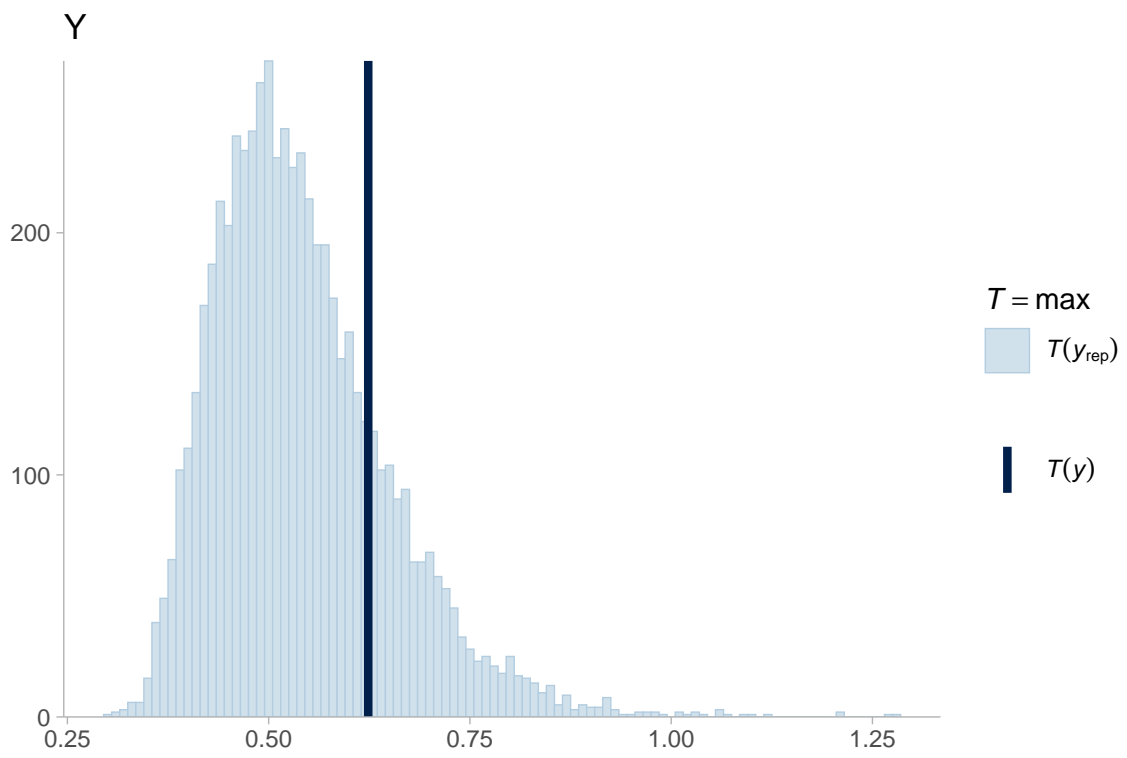

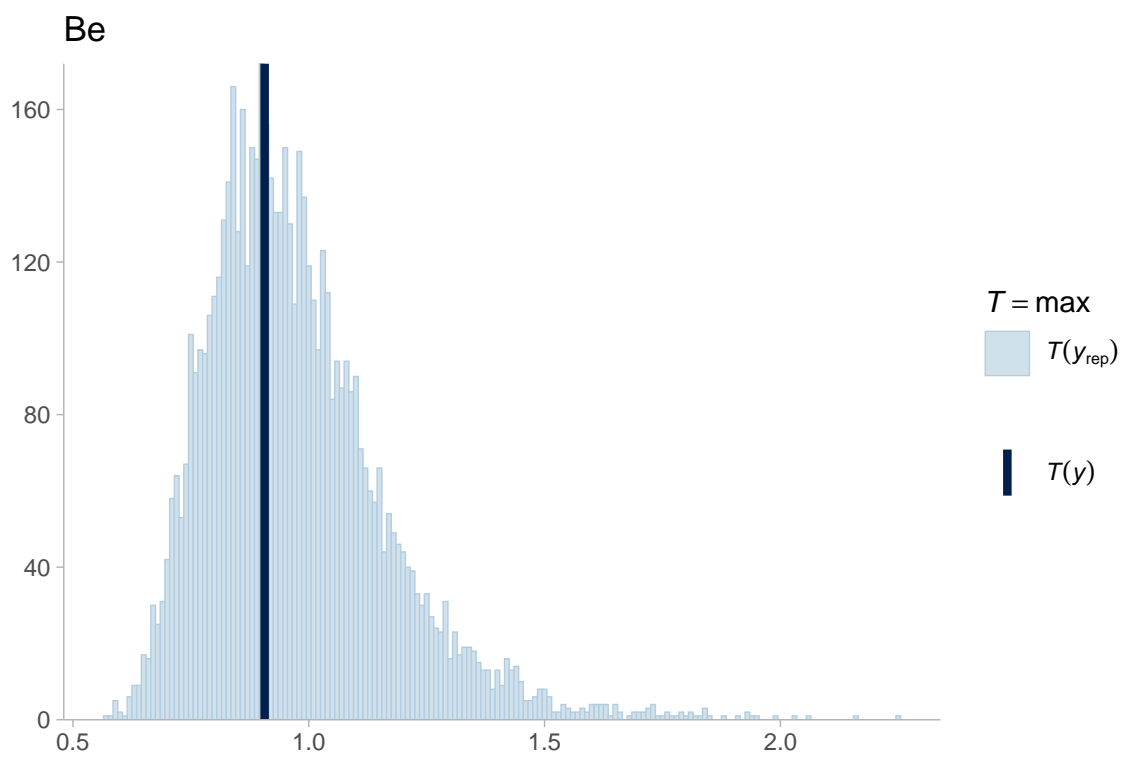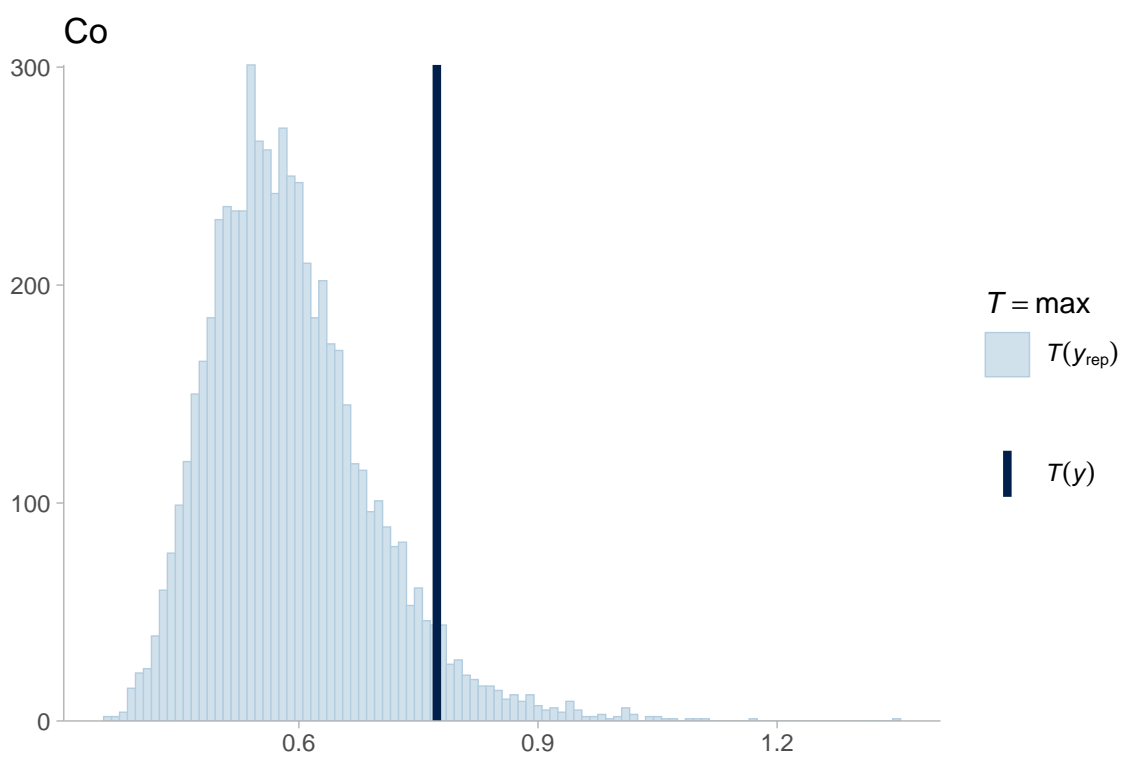

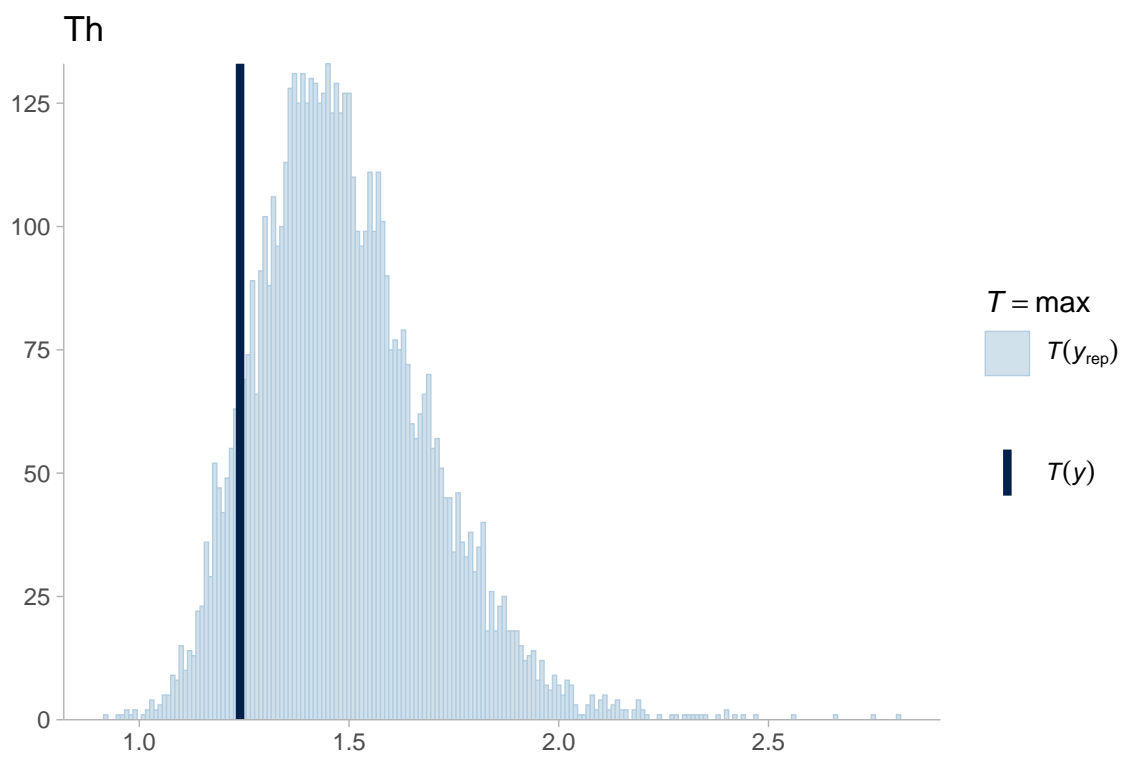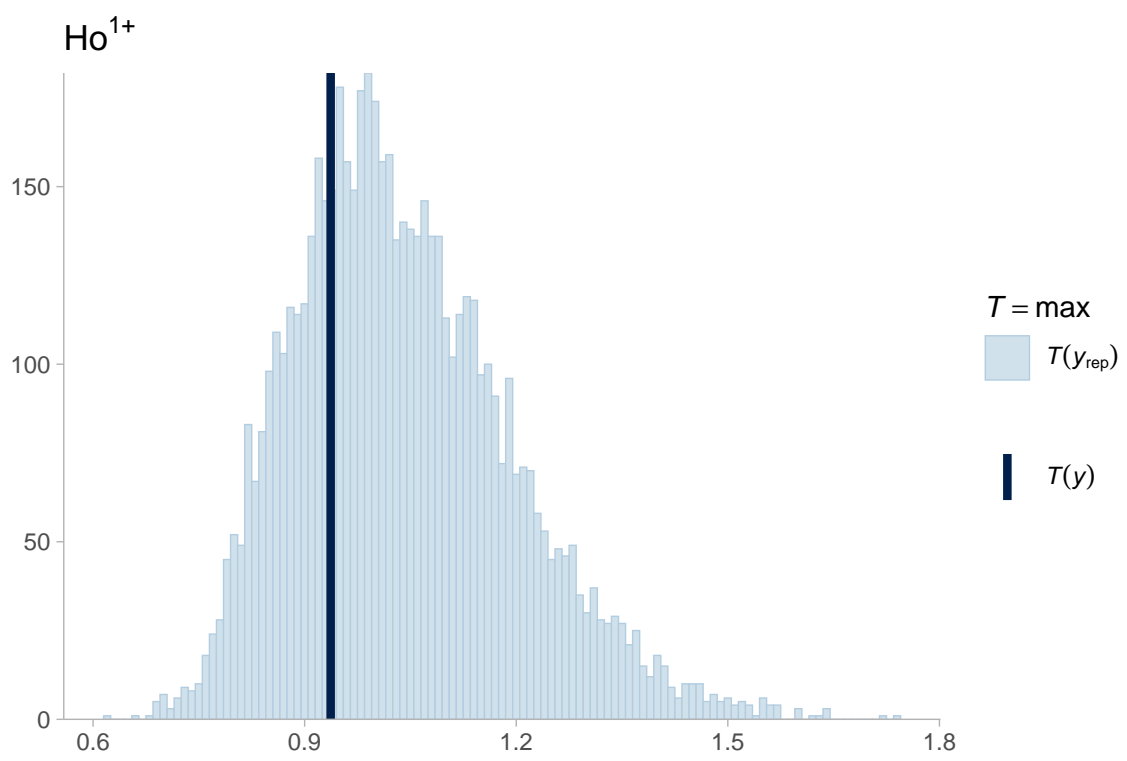

Clearly, the model is underestimating the observed max for all of the +2 methods. There is some important aspect of the true data generating process that isn't captured by the model. One potential place to look for explanations for this discrepancy may be the 250ppm matrices, which resulted in fairly extreme under-corrections for all three of the +2 methods, relative to other matrices (see data visualization section above).

## K-fold CV

Finally, the k-fold for model 3, with  $k = 10$ .

```
load("full-analysis-files/mod3_As_mv.rda")

library(future)
plan(multisession)
kfold_3 <- kfold(mod3, K = 10, save_fits = TRUE)
save(kfold_3, file = "full-analysis-files/kfold_3.rda")
plan(sequential)
```

The result.

```
##
## Based on 10-fold cross-validation
##
##           Estimate    SE
## elpd_kfold  4536.3  90.0
## p_kfold     699.4  21.9
## kfoldic    -9072.6 180.1
```

The comparison.

```
load("full-analysis-files/kfold_1.rda")
load("full-analysis-files/kfold_2.rda")
load("full-analysis-files/kfold_3.rda")
loo_compare(kfold_1, kfold_2, kfold_3)
```

```
##      elpd_diff se_diff
## mod3      0.0      0.0
## mod3    -390.5     37.0
## mod1   -1139.3     54.3
```

The more flexible model 3 is clearly favored.

## Posterior inferences

With the potential limitations to the model suggested by the predictive checks loo-CV diagnostics, the focus moves next to posterior inferences, which will be based on the last model.

### Conditional means

Below are plots of the fitted values of the linear predictors for both  $\mu$  and  $\sigma$  across the different experimental groupings. These estimates pertain to expected population averages, conditional on the model, data, and priors, and include uncertainty in the estimation of each of the parameters comprising the linear predictors.

$\mu$  First, the estimated conditional means for the  $\mu$  component of the model.

**Tune** Estimate means conditional on method and tune while marginalizing over matrix and day.

```

load("full-analysis-files/df_mv_as.rda")
load("full-analysis-files/mod3_As_mv.rda")
fitted_method_tune <- df_mv_as %>%
  add_fitted_draws(mod3,
    dpar = FALSE,
    re_formula = NA,
    cores = 1)
save(fitted_method_tune, file = "full-analysis-files/fitted_method_tune.rda")

```

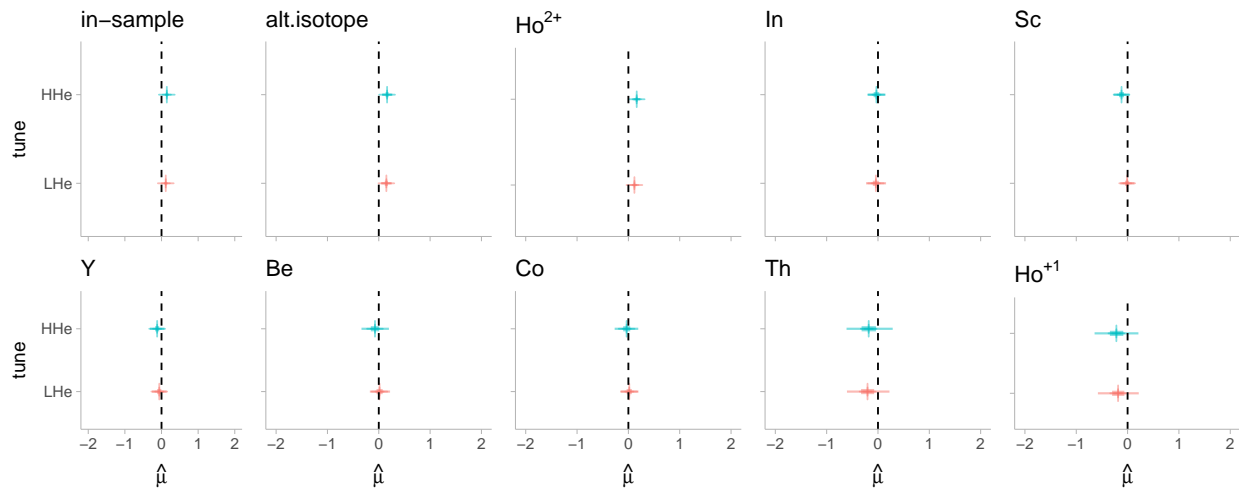

**Day** Estimate means conditional on method and day while marginalizing over matrix.

```

load("full-analysis-files/df_mv_as.rda")
load("full-analysis-files/mod3_As_mv.rda")
fitted_method_day <- df_mv_as %>%
  add_fitted_draws(mod3,
    dpar = FALSE,
    re_formula = ~ (1 | day_expt),
    cores = 1)
save(fitted_method_day, file = "full-analysis-files/fitted_method_day.rda")

```

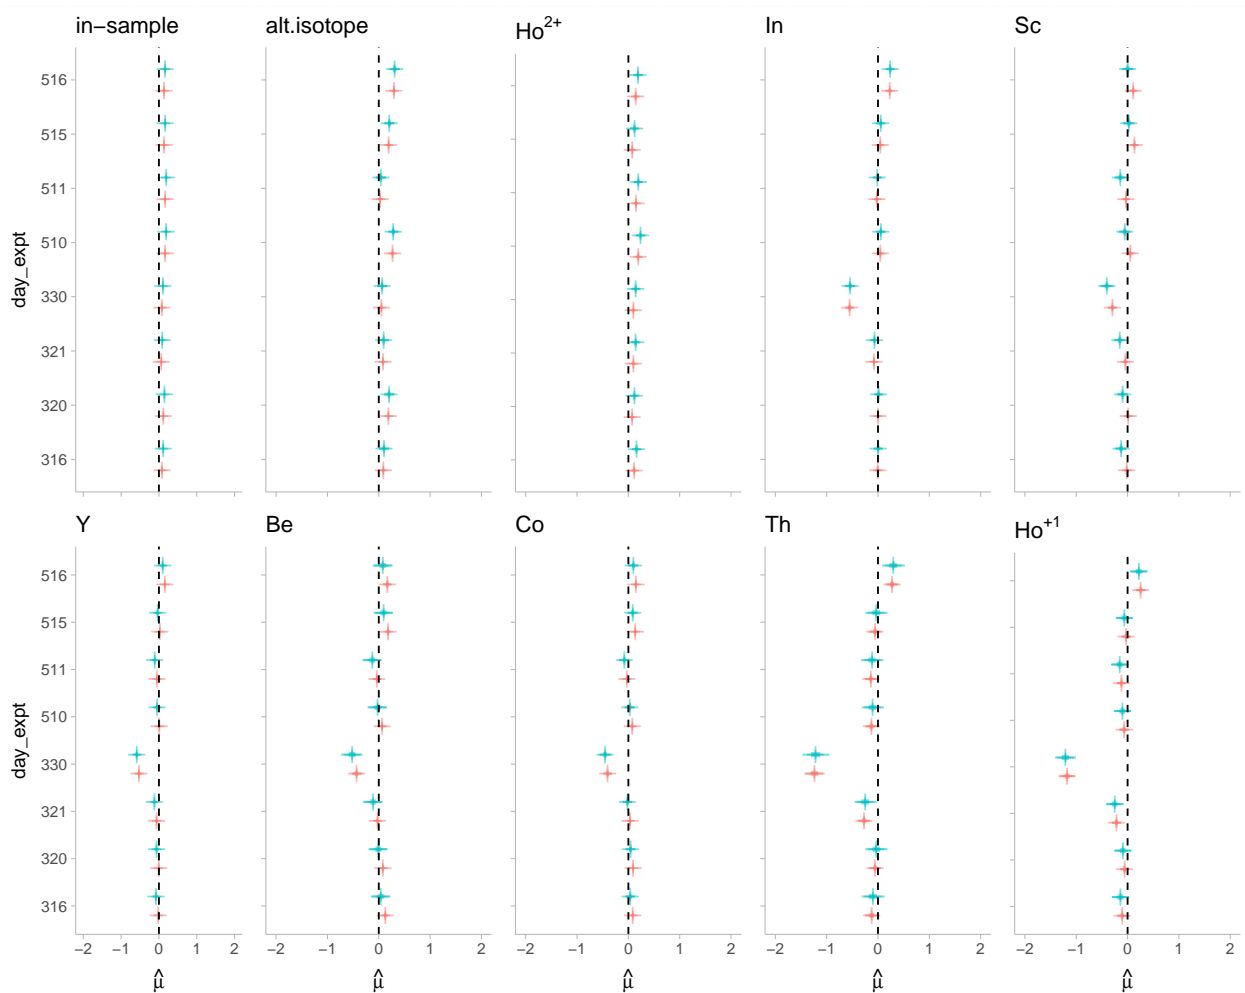

This figure illustrates the large over-correction (i.e., negative bias) expected on 3/30 for all of the +1 methods. By comparison, the means for the +2 methods are relatively consistent across the days of the experiment. Also note the consistent, if slight tendency towards under-correction (i.e., positive bias) estimated across most days for the +2 methods. Within days, there were no clear differences in means due to tune setting.

**Matrix** Estimate means conditional on method and matrix while marginalizing over day.

```
load("full-analysis-files/df_mv_as.rda")
load("full-analysis-files/mod3_As_mv.rda")

fitted_method_matrix <- df_mv_as %>%
  add_fitted_draws(mod3,
    dpar = FALSE,
    re_formula = ~ (1 | matrix),
    cores = 1)
save(fitted_method_matrix, file = "full-analysis-files/fitted_method_matrix.rda")
```

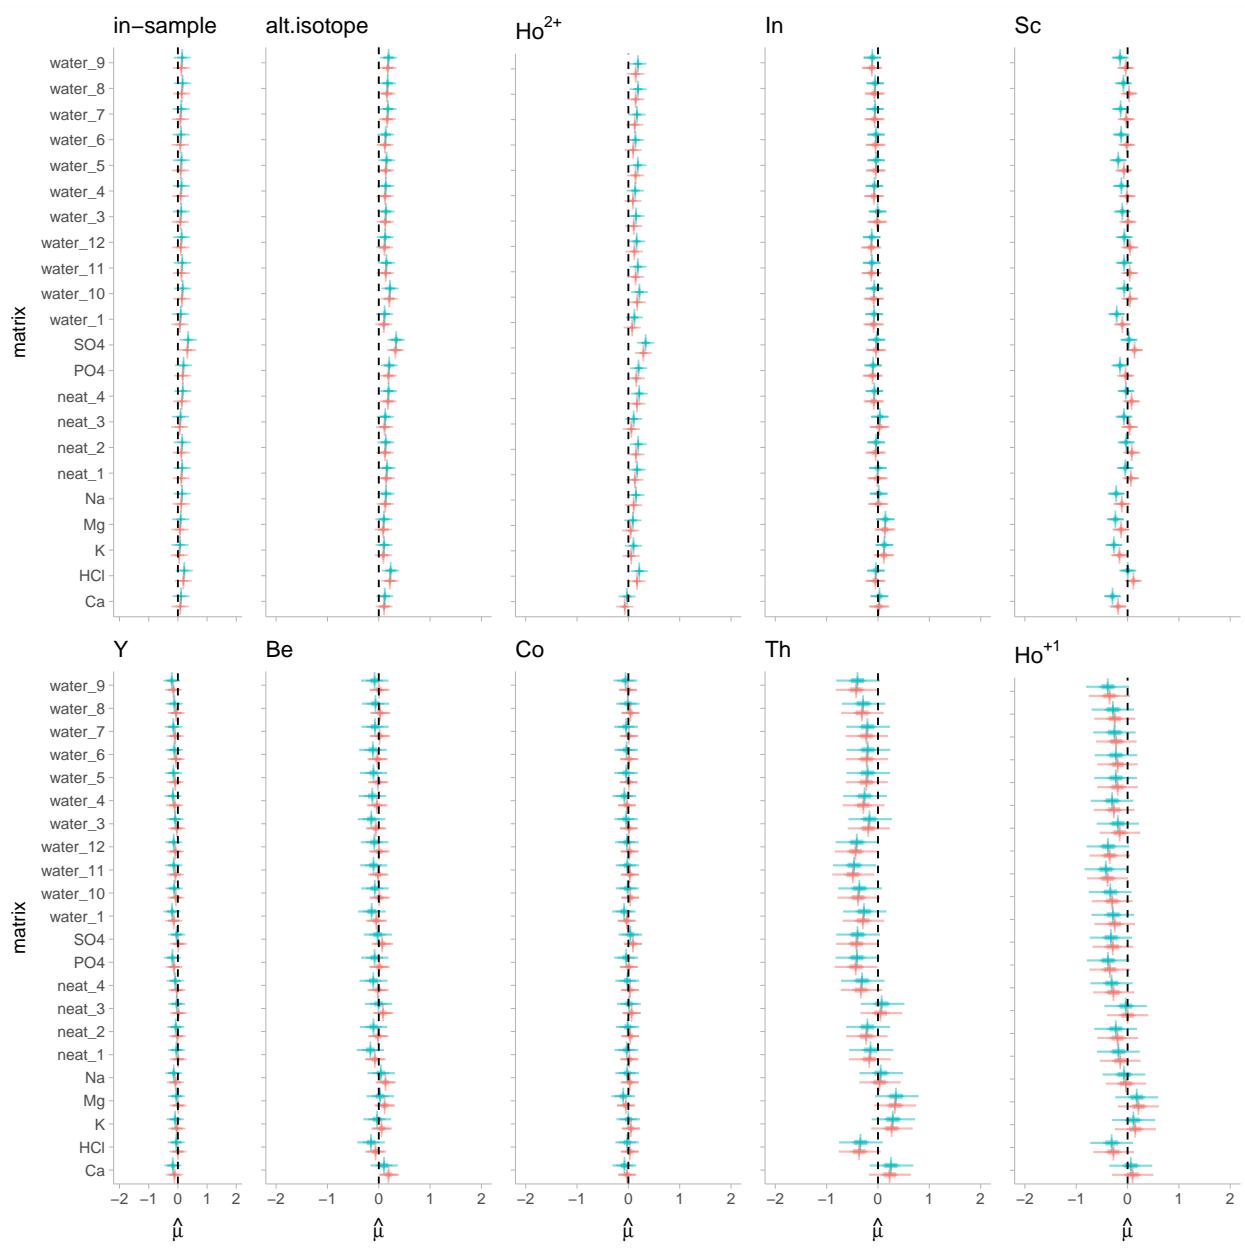

The estimated means for the +2 methods are again largely in the direction of slight under-correction, whereas most of the +1 methods vary around zero bias, with the exception of *Th* and *Ho*<sup>+1</sup>, which tend more towards over-correction, though the inferences are uncertain (credible intervals overlaps zero for most part). Matrix to matrix variability for all of the methods is expected to be relatively less substantial compared to day to day variation above. The tune effect also doesn't appear to be particularly large, if important at all, for most methods.

$\sigma$  Next, the conditional means for the  $\sigma$  component of the model.

```
load("full-analysis-files/df_mv_as.rda")
load("full-analysis-files/mod3_As_mv.rda")
```

```
fitted_sigma_tune <- df_mv_as %>%
  add_fitted_draws(mod3,
    dpar = "sigma",
    re_formula = NA,
    cores = 1)
save(fitted_sigma_tune, file = "full-analysis-files/fitted_sigma_tune.rda")
```

**Tune** The expected standard deviations by tune after marginalizing over matrix are below.

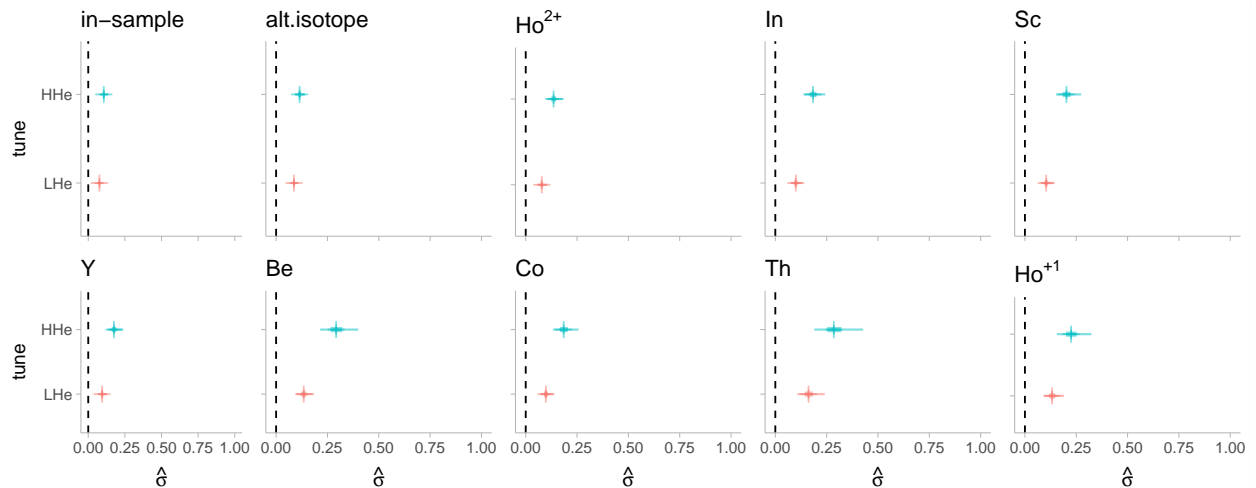

```
load("full-analysis-files/df_mv_as.rda")
load("full-analysis-files/mod3_As_mv.rda")

fitted_sigma_day <- df_mv_as %>%
  add_fitted_draws(mod3,
    dpar = "sigma",
    re_formula = sigma ~ (1 | day_expt),
    cores = 1)
save(fitted_sigma_day, file = "full-analysis-files/fitted_sigma_day.rda")
```

**Day** The expected standard deviations by day after marginalizing over matrix are below.



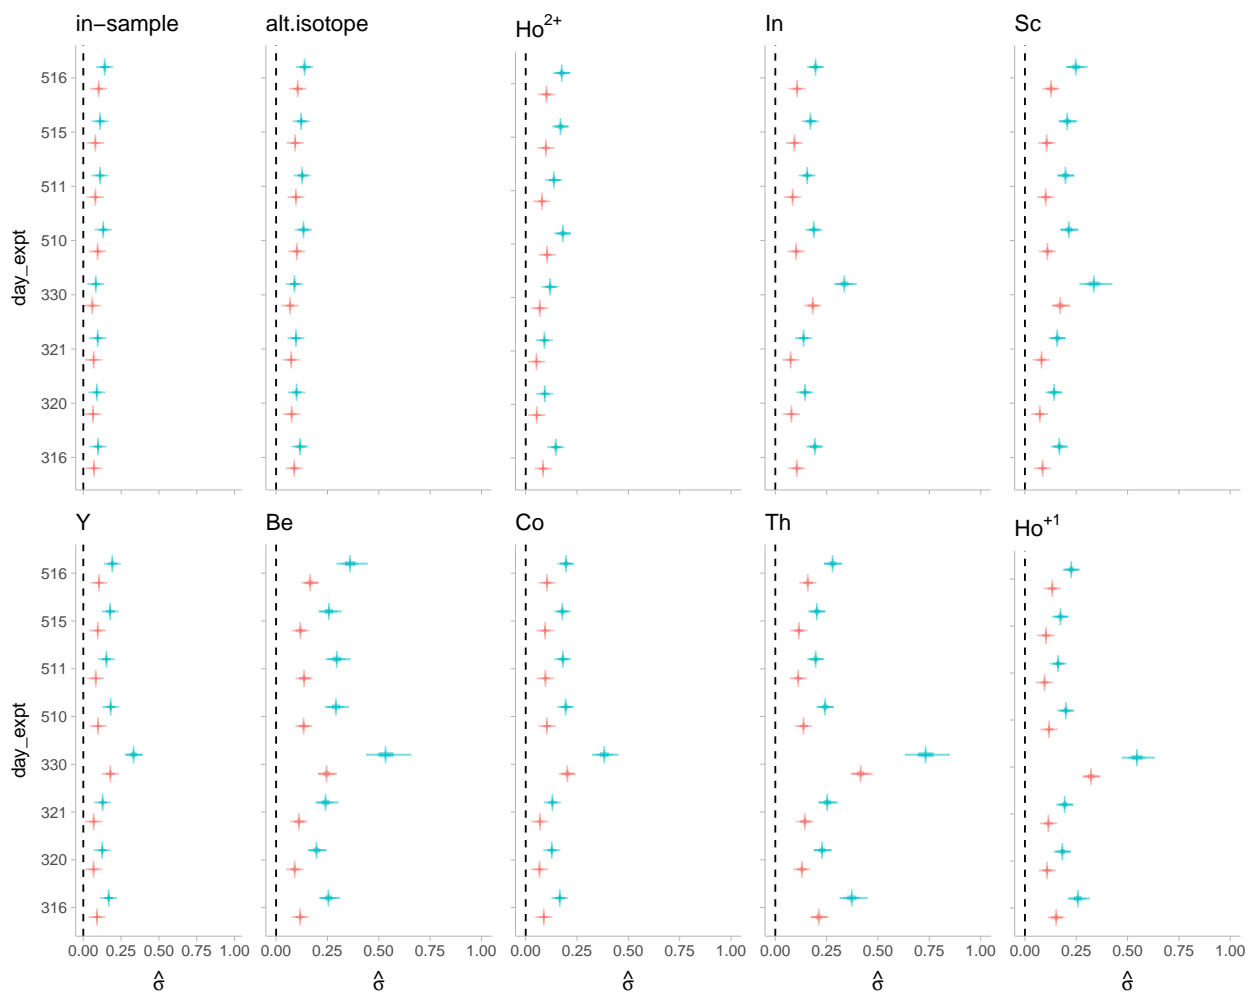

This figures suggest some differences in standard deviation due to tune setting, particularly for the +1 methods. The standard deviation was also estimated to vary fairly substantially day to day, no matter the tune setting, for most of the +1 methods. The largest standard deviation is estimated for 3/30 (cone change day) for all of those methods. Standard deviation may vary slightly day to day for the +2 methods, but the large effect on 3/30 is not apparent. Differences due to tune setting also aren't as clear for the +2 methods.

```
load("full-analysis-files/df_mv_as.rda")
load("full-analysis-files/mod3_As_mv.rda")

fitted_sigma_matrix <- df_mv_as %>%
  add_fitted_draws(mod3,
    dpar = "sigma",
    re_formula = sigma ~ (1 | matrix),
    cores = 1)
save(fitted_sigma_matrix, file = "full-analysis-files/fitted_sigma_matrix.rda")
```

**Matrix** Finally, the expected standard deviations after marginalizing over day.

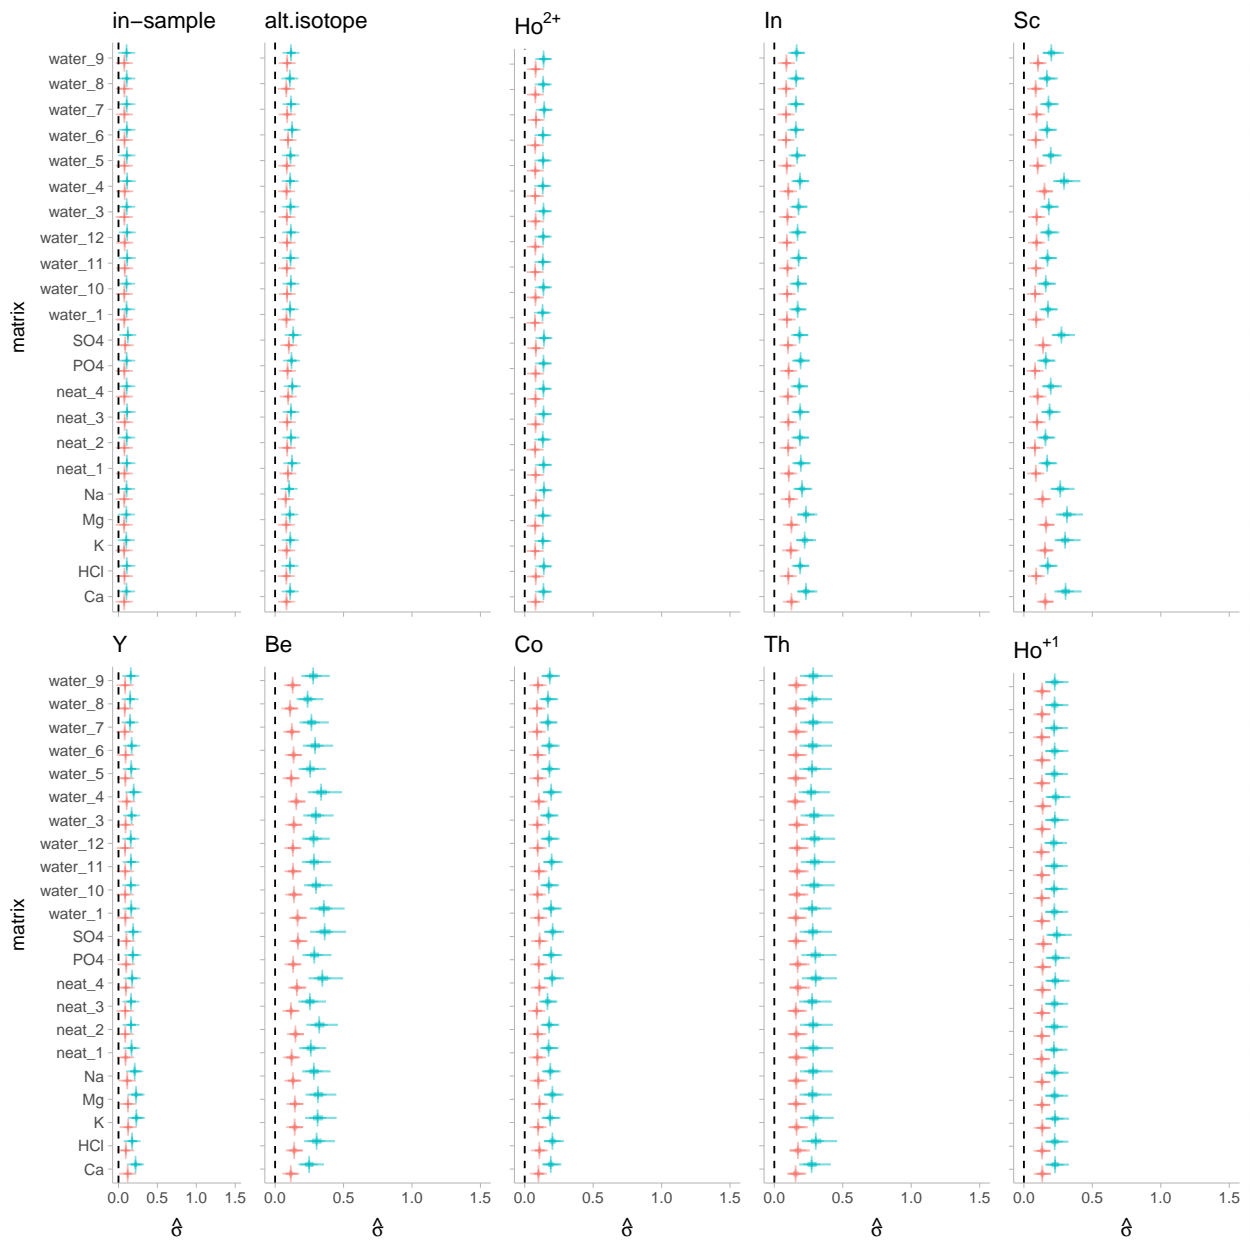

Overall, excepting perhaps the *Sc* method, matrix to matrix variability in standard deviation was estimated to be very low to negligible.

### Residual Correlations

Next, the estimated residual correlations among IS methods. Note that not all pairs are shown under each method, since many are redundant, but all non-redundant pairs are shown.

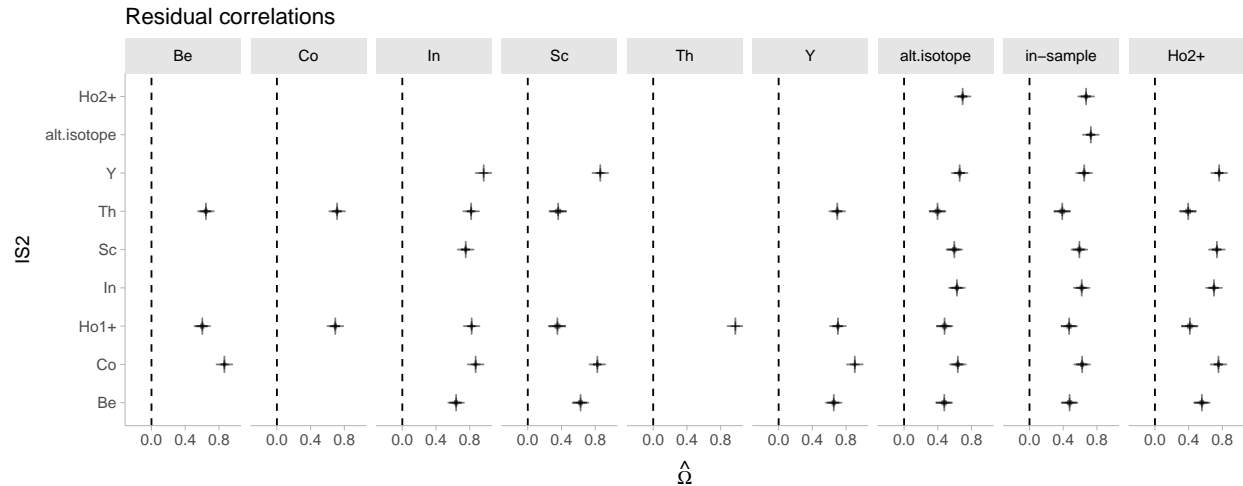

The residual correlations are fairly large (e.g.,  $> 0.8$ ) in many cases, particularly between the +1 methods. These correlations may suggest where sources of unexplained variability may be common between methods.

## Predictions

Next, the model was used to make out-of-sample predictions to a “new” matrix, or day, or both. Here, “new” refers to an out-of-sample matrix and/or day from the hypothetical broader population of matrices or days. When considering predictions to a new matrix, for example, the prediction is for an average matrix estimated from the observed matrices, and includes the uncertainty estimated from the observed matrix to matrix variation. In contrast to the conditional *means* above, the predictions below incorporates both the  $\mu$  (expectation) and  $\sigma$  (standard deviation) components of the fitted model. That is, the predictions,  $y_{new}$ , are drawn from

$$y_{new} \sim N(\hat{\mu}, \hat{\sigma})$$

so they include both parameter and sampling uncertainty.

**Hypothetical data** Hypothetical data are created below to hold the conditions that the model will predict to. The first condition is for a “new” day, but with the same matrix and tune conditions as observed. The new day can be considered as any day that might belong to the same population as the observed days. An average day, assuming the days of this experiment were drawn from a larger population of days; a future or past day, for example.

```
load("full-analysis-files/df_mv_as.rda")

new_day_dat <- expand_grid(matrix = factor(levels(df_mv_as$matrix)),
                          day_expt = "new_day",
                          tune = factor(c("LHe", "HHe"))) %>%
  mutate(tune = relevel(tune, ref = "LHe"))

save(new_day_dat, file = "full-analysis-files/new_day_dat.rda")
```

```
## # A tibble: 44 x 3
##   matrix day_expt tune
##   <fct> <chr> <fct>
## 1 Ca    new_day LHe
## 2 Ca    new_day HHe
```

```
## 3 HCl    new_day LHe
## 4 HCl    new_day HHe
## 5 K      new_day LHe
## 6 K      new_day HHe
## 7 Mg     new_day LHe
## 8 Mg     new_day HHe
## 9 Na     new_day LHe
## 10 Na    new_day HHe
## # ... with 34 more rows
```

Next, a hypothetical new matrix for the observed days and tune settings.

```
load("full-analysis-files/df_mv_as.rda")

new_matrix_dat <- expand_grid(matrix = factor("new_matrix"),
                             day_expt = factor(levels(df_mv_as$day_expt)),
                             tune = factor(c("LHe", "HHe"))) %>%
  mutate(tune = relevel(tune, ref = "LHe"))

save(new_matrix_dat, file = "full-analysis-files/new_matrix_dat.rda")
```

```
## # A tibble: 16 x 3
##   matrix    day_expt tune
##   <fct>    <fct>   <fct>
## 1 new_matrix 316     LHe
## 2 new_matrix 316     HHe
## 3 new_matrix 320     LHe
## 4 new_matrix 320     HHe
## 5 new_matrix 321     LHe
## 6 new_matrix 321     HHe
## 7 new_matrix 330     LHe
## 8 new_matrix 330     HHe
## 9 new_matrix 510     LHe
## 10 new_matrix 510     HHe
## 11 new_matrix 511     LHe
## 12 new_matrix 511     HHe
## 13 new_matrix 515     LHe
## 14 new_matrix 515     HHe
## 15 new_matrix 516     LHe
## 16 new_matrix 516     HHe
```

Finally, a new day and matrix for the observed tune settings.

```
load("full-analysis-files/df_mv_as.rda")
# Include replicate observations for estimating uncertainty in probability to over-correct
new_matrix_day_dat <- expand_grid(matrix = factor("new_matrix"),
                                 day_expt = factor("new_day"),
                                 tune = factor(c("LHe", "HHe"))) %>%
  mutate(tune = relevel(tune, ref = "LHe"))

save(new_matrix_day_dat, file = "full-analysis-files/new_matrix_day_dat.rda")
```

```
## # A tibble: 2 x 3
```

```
## matrix      day_expt tune
## <fct>      <fct> <fct>
## 1 new_matrix new_day LHe
## 2 new_matrix new_day HHe
```

**Day** The predictions for the observed days for a new matrix are below.

# Arsenic

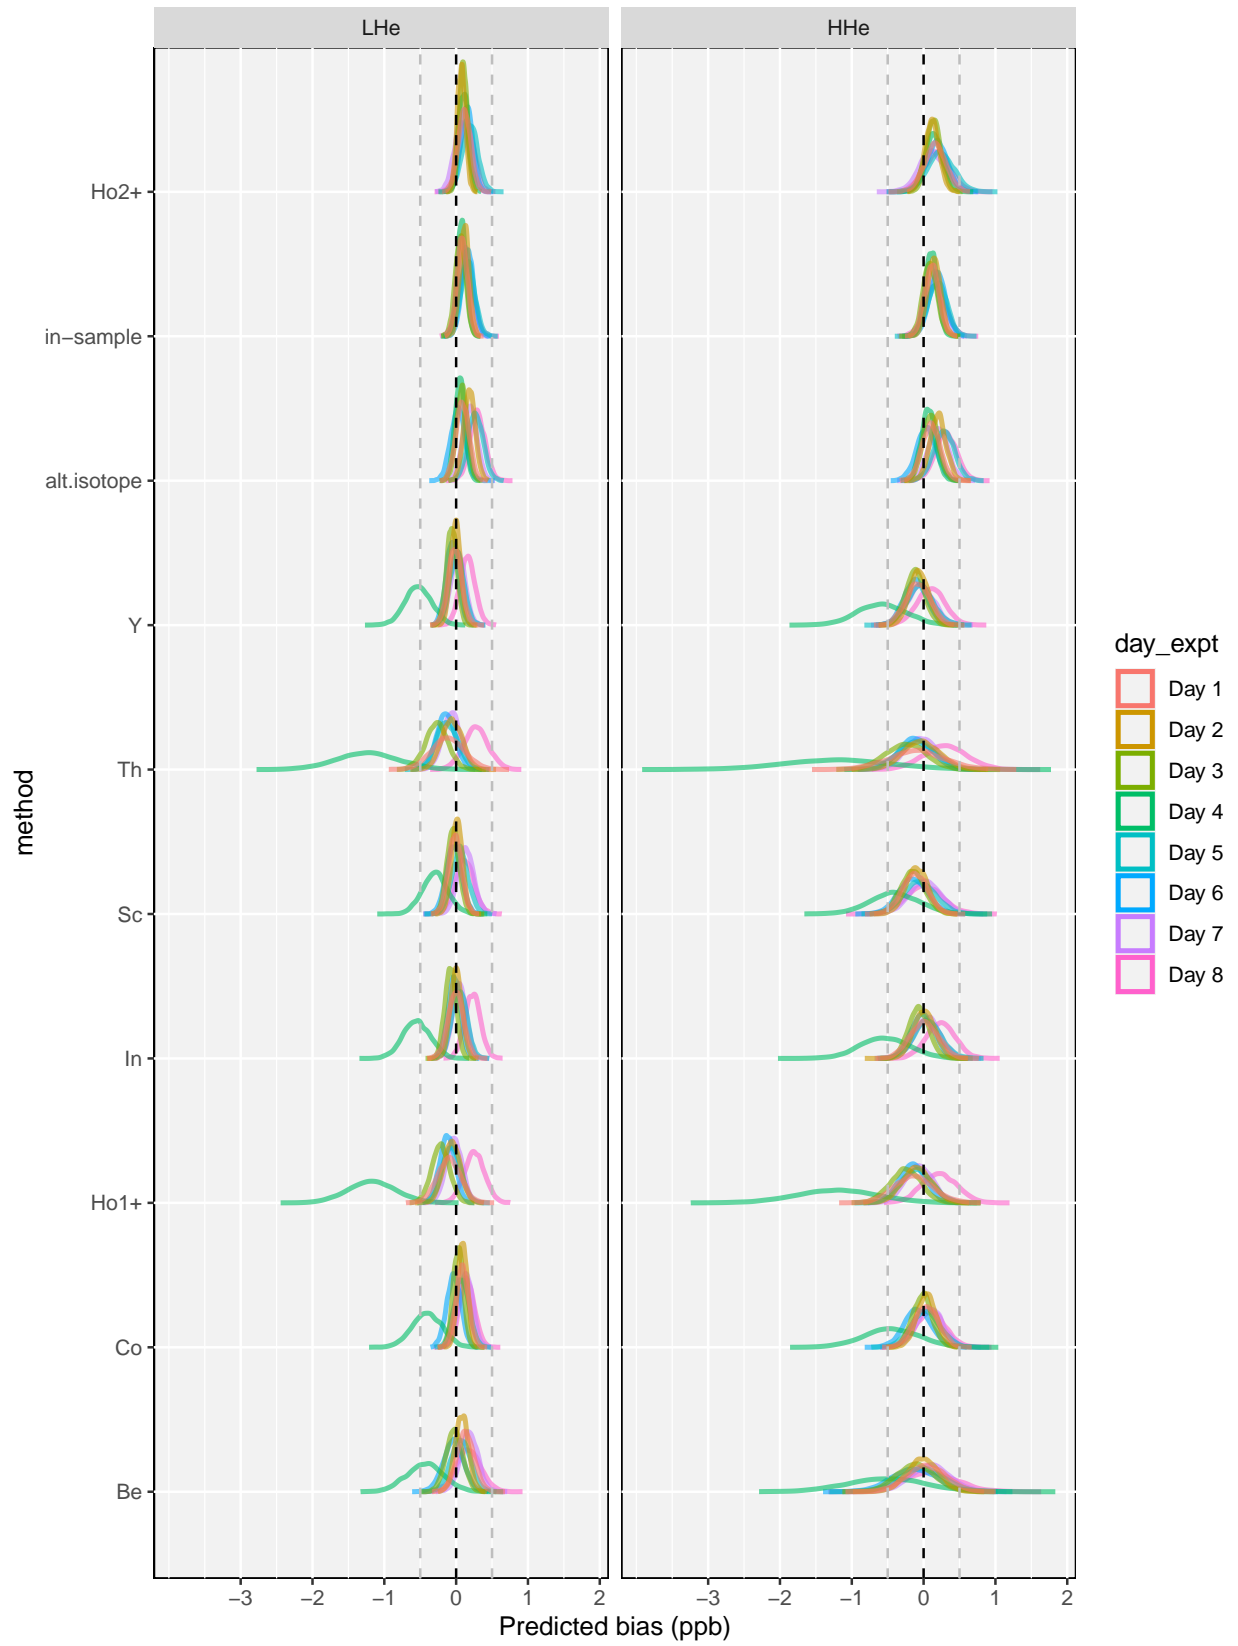

As expected from examining the conditional means for  $\mu$ , the model predicts a high probability of relatively extreme over-corrections on 3/30 for all of the +1 methods. None of the +2 method's predictions included much probability in that region. The predictions for the +1 methods also suggest much more day to day variability in general.

As suggested in the conditional means for  $\sigma$ , the standard deviation of the +1 and +2 methods are generally predicted to be lower for the LHe tune, though the difference is more extreme for the +1 methods. The standard deviation was generally lower on 3/30 for the +2 methods as well, compared to other days within method.

**Matrix** The predictions to the observed matrices for a new day is below.

# Arsenic

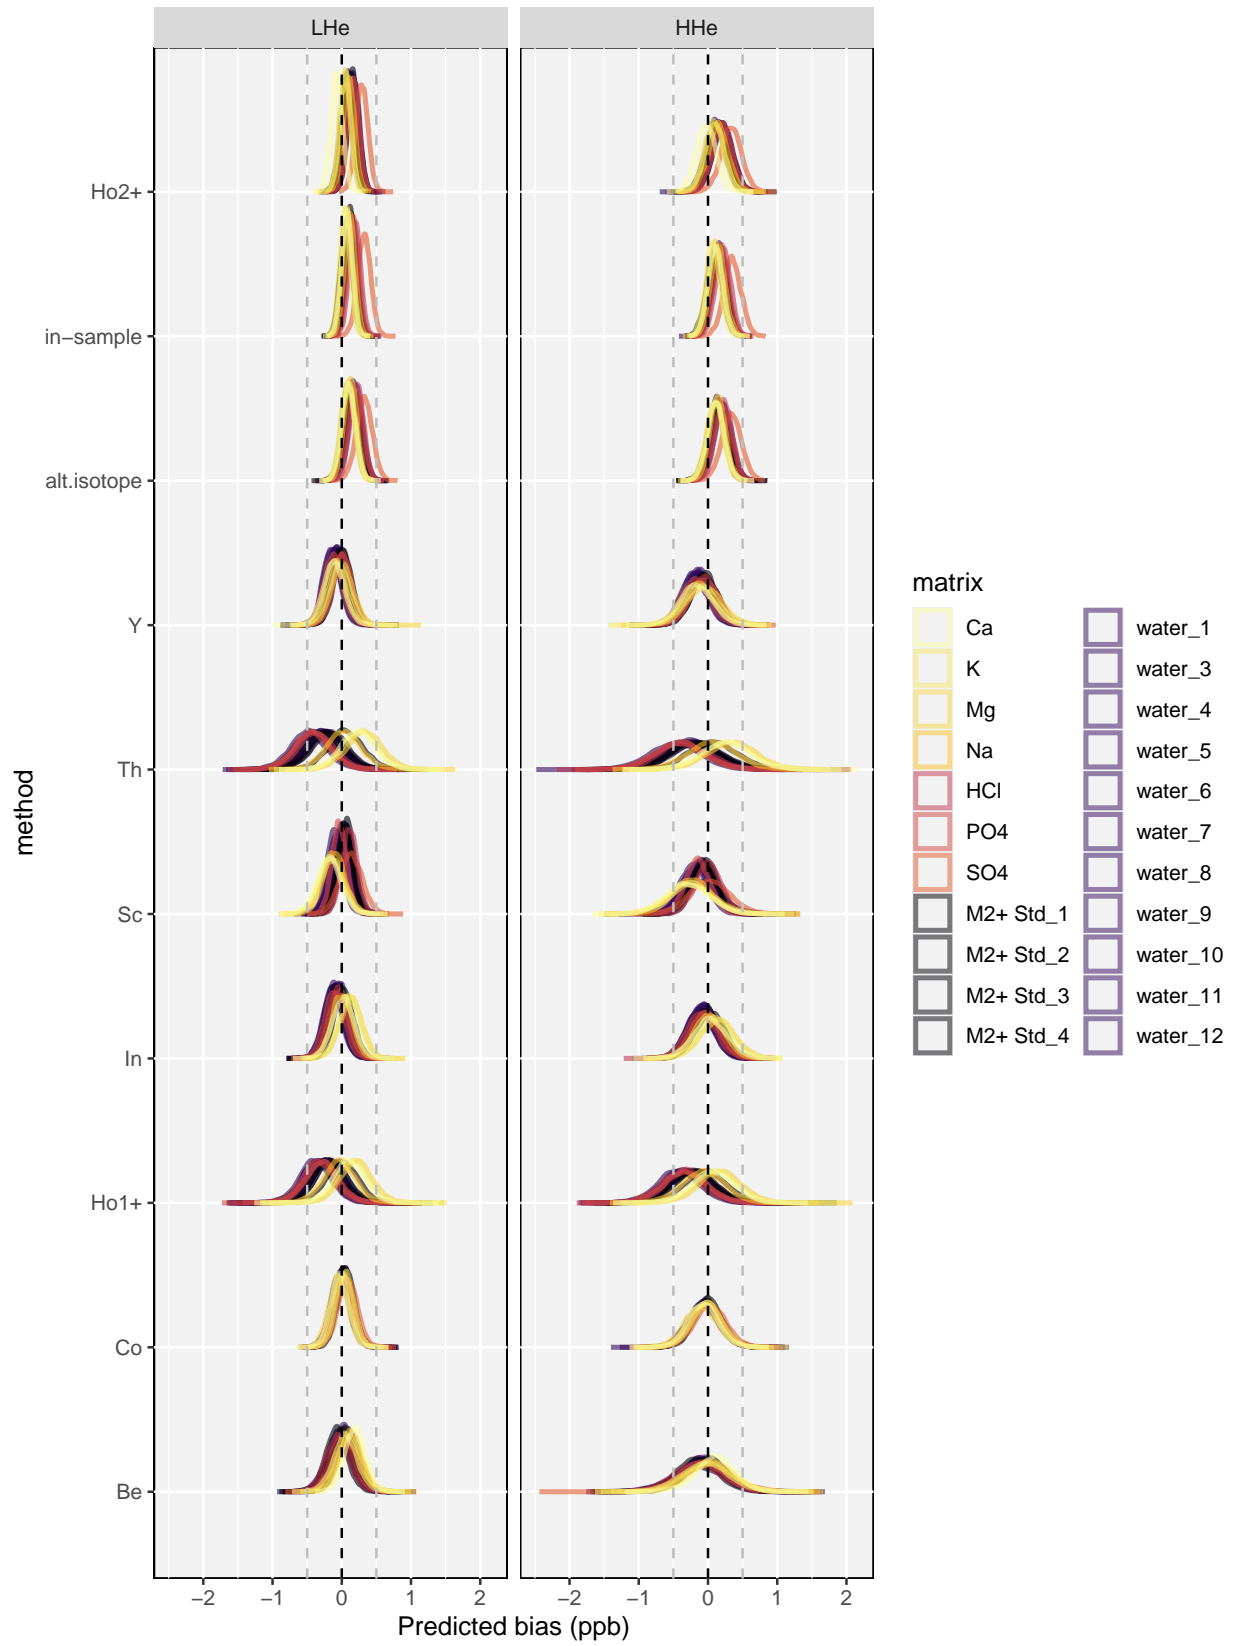



Matrix to matrix variability is predicted to be lower than day to day, in general across all methods. With regard to any particular matrix, the predictions for some of the 250ppm matrices consistently suggest positive bias for *Th*, *Ho*<sup>+1</sup>, and *In* relative to the other matrices in those methods. For the +2 methods, the 250ppm *SO*<sub>4</sub> matrix is consistently predicted with somewhat higher probability to under-correct relative to other matrices. Overall differences in standard deviation by method are again clear in this figure, with *Th* and *Ho*<sup>+1</sup> being the least precise predictions. Within method, differences due to tune are again apparent, with the HHe tune generally predicted to result in more variable bias.

**New day and matrix** The predictions for a new day and new matrix for the observed tune settings are below.

The proportion of posterior prediction samples with over-corrections for each case.

```
## # A tibble: 20 x 4
## # Groups:   .category [10]
##   .category method      tune p_over
##   <fct>      <fct>      <fct> <dbl>
## 1 Std        in-sample  LHe    0.07
## 2 Std        in-sample  HHe    0.1
## 3 Alt        alt.isotope LHe    0.07
## 4 Alt        alt.isotope HHe    0.1
## 5 Ho2        Ho2+       LHe    0.07
## 6 Ho2        Ho2+       HHe    0.12
## 7 In         In         LHe    0.62
## 8 In         In         HHe    0.55
## 9 Sc         Sc         LHe    0.52
## 10 Sc        Sc         HHe    0.7
## 11 Y         Y         LHe    0.68
## 12 Y         Y         HHe    0.72
## 13 Be        Be         LHe    0.45
## 14 Be        Be         HHe    0.59
## 15 Co        Co         LHe    0.44
## 16 Co        Co         HHe    0.55
## 17 Th        Th         LHe    0.78
## 18 Th        Th         HHe    0.69
## 19 Ho1       Ho1+      LHe    0.78
## 20 Ho1       Ho1+      HHe    0.76
```

# Arsenic

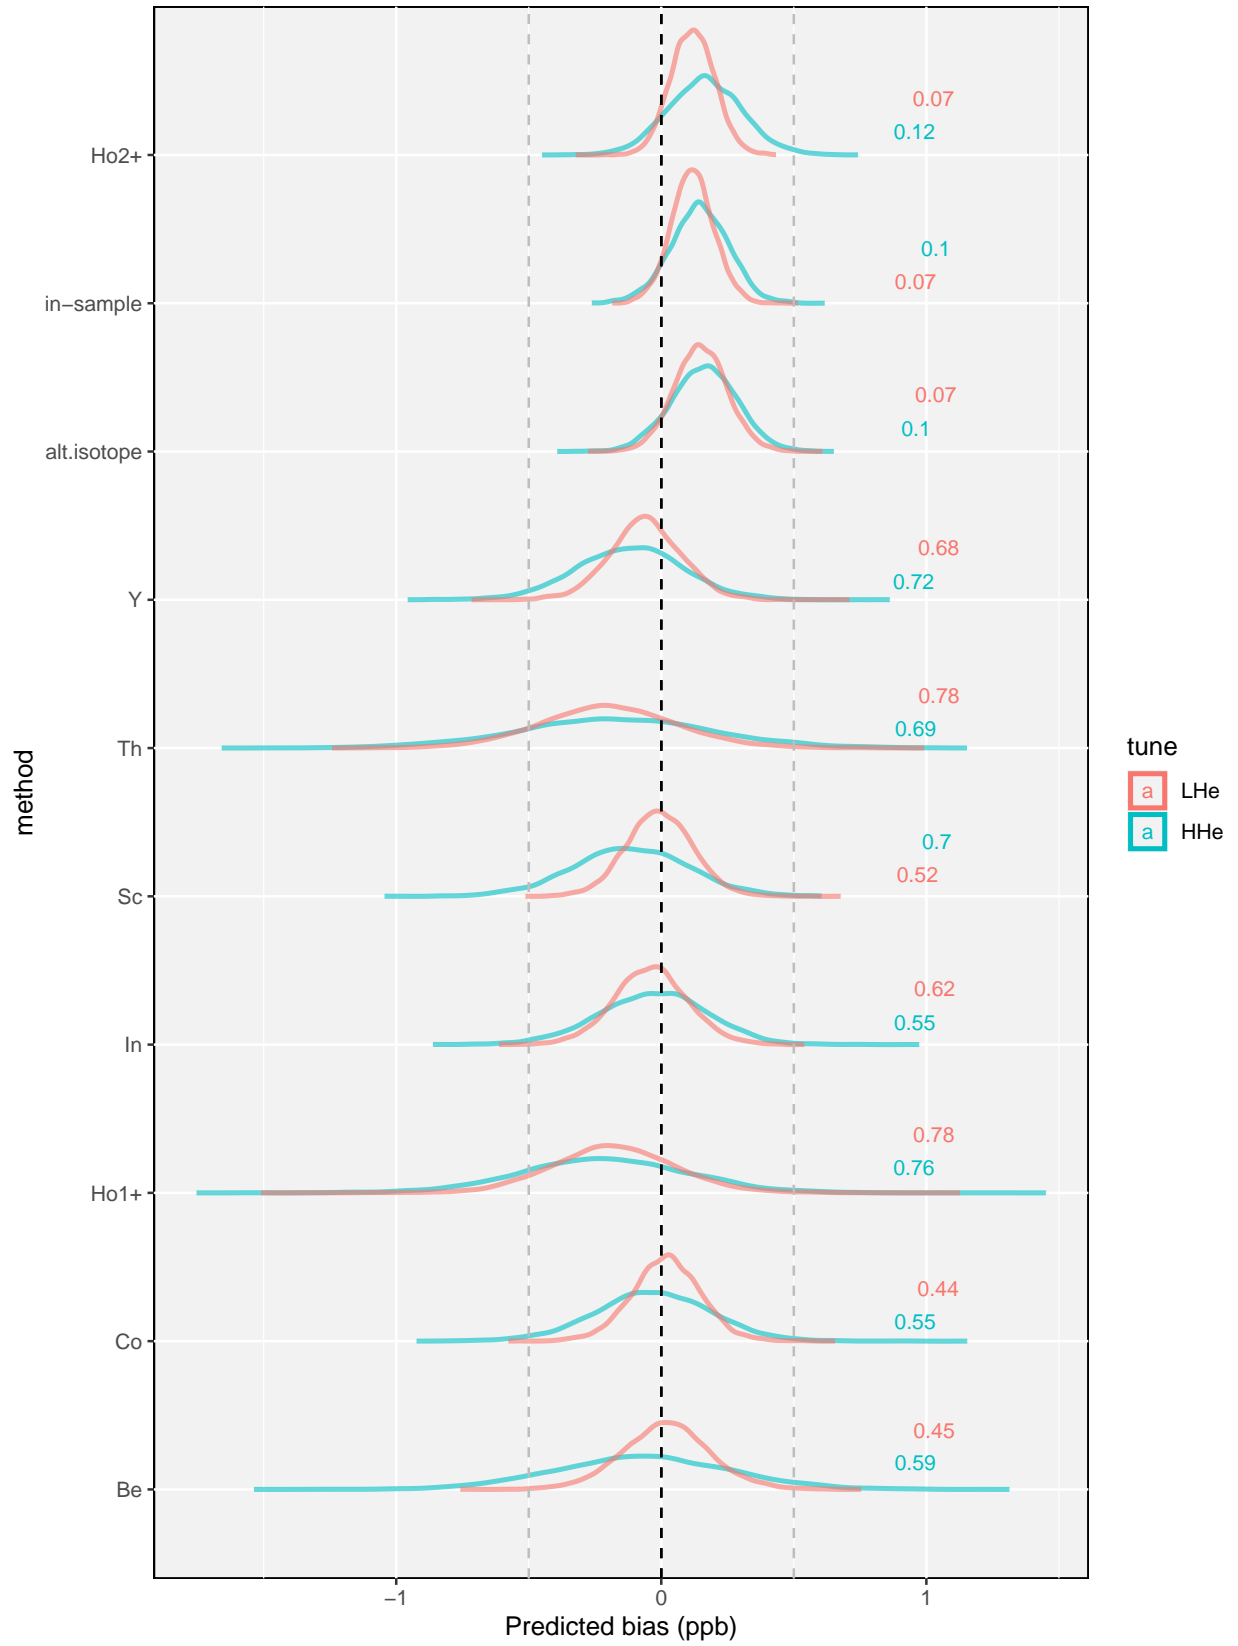

In this last set of predictions above, the most clear takeaways are (1) the variation in precision of the predictions across the different internal standard methods and tunes; and (2) the variations in the proportion of over- vs. under-corrected draws from the posterior predictive distribution. The predictions for the +2 methods are clearly more precise and their tendency to under-correct, on average, is also clear. The predictions for the +1 methods, by comparison, are much less precise and the bias is typically either minimal to more in the direction of over-correction. Overall, the HHe tune setting is consistently predicted with less precision across all of the methods.

## A final model for selenium

The final model for arsenic is also applied to the selenium observations in the following analyses. In this model, the priors on fixed intercepts and the standard deviations for the varying intercepts were adjusted upward by a factor of 10 to account for the difference in scale.

```
load("full-analysis-files/df_mv_se.rda")

bf_Std <- bf(Std ~ tune + (tune | matrix) + (tune | day_expt),
            sigma ~ tune + (1 | matrix) + (1 | day_expt),
            family = gaussian())

bf_Alt <- bf(Alt ~ tune + (tune | matrix) + (tune | day_expt),
            sigma ~ tune + (1 | matrix) + (1 | day_expt),
            family = gaussian())

bf_Ho2 <- bf(Ho2 ~ tune + (tune | matrix) + (tune | day_expt),
            sigma ~ tune + (1 | matrix) + (1 | day_expt),
            family = gaussian())

bf_In <- bf(In ~ tune + (tune | matrix) + (tune | day_expt),
            sigma ~ tune + (1 | matrix) + (1 | day_expt),
            family = gaussian())

bf_Sc <- bf(Sc ~ tune + (tune | matrix) + (tune | day_expt),
            sigma ~ tune + (1 | matrix) + (1 | day_expt),
            family = gaussian())

bf_Y <- bf(Y ~ tune + (tune | matrix) + (tune | day_expt),
            sigma ~ tune + (1 | matrix) + (1 | day_expt),
            family = gaussian())

bf_Be <- bf(Be ~ tune + (tune | matrix) + (tune | day_expt),
            sigma ~ tune + (1 | matrix) + (1 | day_expt),
            family = gaussian())

bf_Co <- bf(Co ~ tune + (tune | matrix) + (tune | day_expt),
            sigma ~ tune + (1 | matrix) + (1 | day_expt),
            family = gaussian())

bf_Th <- bf(Th ~ tune + (tune | matrix) + (tune | day_expt),
            sigma ~ tune + (1 | matrix) + (1 | day_expt),
            family = gaussian())
```

```

bf_Ho1 <- bf(Ho1 ~ tune + (tune | matrix) + (tune | day_expt),
  sigma ~ tune + (1 | matrix) + (1 | day_expt),
  family = gaussian())

mod3 <- brm(bf_Std +
  bf_Alt +
  bf_Ho2 +
  bf_In +
  bf_Sc +
  bf_Y +
  bf_Be +
  bf_Co +
  bf_Th +
  bf_Ho1 +
  set_rescor(TRUE),
  data = df_mv_se,
  prior = c(prior(normal(0, 10), class = "Intercept", resp = "Std"),
    prior(normal(0, 10), class = "Intercept", resp = "Alt"),
    prior(normal(0, 10), class = "Intercept", resp = "Ho2"),
    prior(normal(0, 10), class = "Intercept", resp = "In"),
    prior(normal(0, 10), class = "Intercept", resp = "Sc"),
    prior(normal(0, 10), class = "Intercept", resp = "Y"),
    prior(normal(0, 10), class = "Intercept", resp = "Be"),
    prior(normal(0, 10), class = "Intercept", resp = "Co"),
    prior(normal(0, 10), class = "Intercept", resp = "Th"),
    prior(normal(0, 10), class = "Intercept", resp = "Ho1"),

    prior(normal(0, 10), class = "b", resp = "Std"),
    prior(normal(0, 10), class = "b", resp = "Alt"),
    prior(normal(0, 10), class = "b", resp = "Ho2"),
    prior(normal(0, 10), class = "b", resp = "In"),
    prior(normal(0, 10), class = "b", resp = "Sc"),
    prior(normal(0, 10), class = "b", resp = "Y"),
    prior(normal(0, 10), class = "b", resp = "Be"),
    prior(normal(0, 10), class = "b", resp = "Co"),
    prior(normal(0, 10), class = "b", resp = "Th"),
    prior(normal(0, 10), class = "b", resp = "Ho1"),

    prior(normal(0, 10), class = "sd", resp = "Std"),
    prior(normal(0, 10), class = "sd", resp = "Alt"),
    prior(normal(0, 10), class = "sd", resp = "Ho2"),
    prior(normal(0, 10), class = "sd", resp = "In"),
    prior(normal(0, 10), class = "sd", resp = "Sc"),
    prior(normal(0, 10), class = "sd", resp = "Y"),
    prior(normal(0, 10), class = "sd", resp = "Be"),
    prior(normal(0, 10), class = "sd", resp = "Co"),
    prior(normal(0, 10), class = "sd", resp = "Th"),
    prior(normal(0, 10), class = "sd", resp = "Ho1"),

    prior(normal(2, 1), class = "Intercept", dpar = "sigma", resp = "Std"),
    prior(normal(2, 1), class = "Intercept", dpar = "sigma", resp = "Alt"),
    prior(normal(2, 1), class = "Intercept", dpar = "sigma", resp = "Ho2"),
    prior(normal(2, 1), class = "Intercept", dpar = "sigma", resp = "In"),

```

```

prior(normal(2, 1), class = "Intercept", dpar = "sigma", resp = "Sc"),
prior(normal(2, 1), class = "Intercept", dpar = "sigma", resp = "Y"),
prior(normal(2, 1), class = "Intercept", dpar = "sigma", resp = "Be"),
prior(normal(2, 1), class = "Intercept", dpar = "sigma", resp = "Co"),
prior(normal(2, 1), class = "Intercept", dpar = "sigma", resp = "Th"),
prior(normal(2, 1), class = "Intercept", dpar = "sigma", resp = "Ho1"),

prior(normal(0, 10), class = "b", dpar = "sigma", resp = "Std"),
prior(normal(0, 10), class = "b", dpar = "sigma", resp = "Alt"),
prior(normal(0, 10), class = "b", dpar = "sigma", resp = "Ho2"),
prior(normal(0, 10), class = "b", dpar = "sigma", resp = "In"),
prior(normal(0, 10), class = "b", dpar = "sigma", resp = "Sc"),
prior(normal(0, 10), class = "b", dpar = "sigma", resp = "Y"),
prior(normal(0, 10), class = "b", dpar = "sigma", resp = "Be"),
prior(normal(0, 10), class = "b", dpar = "sigma", resp = "Co"),
prior(normal(0, 10), class = "b", dpar = "sigma", resp = "Th"),
prior(normal(0, 10), class = "b", dpar = "sigma", resp = "Ho1"),

prior(normal(0, 10), class = "sd", dpar = "sigma", resp = "Std"),
prior(normal(0, 10), class = "sd", dpar = "sigma", resp = "Alt"),
prior(normal(0, 10), class = "sd", dpar = "sigma", resp = "Ho2"),
prior(normal(0, 10), class = "sd", dpar = "sigma", resp = "In"),
prior(normal(0, 10), class = "sd", dpar = "sigma", resp = "Sc"),
prior(normal(0, 10), class = "sd", dpar = "sigma", resp = "Y"),
prior(normal(0, 10), class = "sd", dpar = "sigma", resp = "Be"),
prior(normal(0, 10), class = "sd", dpar = "sigma", resp = "Co"),
prior(normal(0, 10), class = "sd", dpar = "sigma", resp = "Th"),
prior(normal(0, 10), class = "sd", dpar = "sigma", resp = "Ho1"),

prior(lkj(1), class = "rescor")
),
control = list(adapt_delta = 0.95, max_treedepth = 14),
init_r = 0.05,
save_pars = save_pars(all = TRUE),
seed = 5214,
chains=4,
iter=3000,
cores=4 )

save(mod3, file = "full-analysis-files/mod3_Se_mv.rda")

```

## Tabular parameter estimates

Again, a summary of the posterior estimates.

```

## Family: MV(gaussian, gaussian, gaussian, gaussian, gaussian, gaussian, gaussian, gaussian, gaussian)
## Links: mu = identity; sigma = log
##      mu = identity; sigma = log

```

```

##          mu = identity; sigma = log
## Formula: Std ~ tune + (tune | matrix) + (tune | day_expt)
##          sigma ~ tune + (1 | matrix) + (1 | day_expt)
##          Alt ~ tune + (tune | matrix) + (tune | day_expt)
##          sigma ~ tune + (1 | matrix) + (1 | day_expt)
##          Ho2 ~ tune + (tune | matrix) + (tune | day_expt)
##          sigma ~ tune + (1 | matrix) + (1 | day_expt)
##          In ~ tune + (tune | matrix) + (tune | day_expt)
##          sigma ~ tune + (1 | matrix) + (1 | day_expt)
##          Sc ~ tune + (tune | matrix) + (tune | day_expt)
##          sigma ~ tune + (1 | matrix) + (1 | day_expt)
##          Y ~ tune + (tune | matrix) + (tune | day_expt)
##          sigma ~ tune + (1 | matrix) + (1 | day_expt)
##          Be ~ tune + (tune | matrix) + (tune | day_expt)
##          sigma ~ tune + (1 | matrix) + (1 | day_expt)
##          Co ~ tune + (tune | matrix) + (tune | day_expt)
##          sigma ~ tune + (1 | matrix) + (1 | day_expt)
##          Th ~ tune + (tune | matrix) + (tune | day_expt)
##          sigma ~ tune + (1 | matrix) + (1 | day_expt)
##          Ho1 ~ tune + (tune | matrix) + (tune | day_expt)
##          sigma ~ tune + (1 | matrix) + (1 | day_expt)
## Data: df_mv_se (Number of observations: 352)
## Draws: 4 chains, each with iter = 3000; warmup = 1500; thin = 1;
##          total post-warmup draws = 6000
##
## Priors:
## b_Alt ~ normal(0, 10)
## b_Alt_sigma ~ normal(0, 10)
## b_Be ~ normal(0, 10)
## b_Be_sigma ~ normal(0, 10)
## b_Co ~ normal(0, 10)
## b_Co_sigma ~ normal(0, 10)
## b_Ho1 ~ normal(0, 10)
## b_Ho1_sigma ~ normal(0, 10)
## b_Ho2 ~ normal(0, 10)
## b_Ho2_sigma ~ normal(0, 10)
## b_In ~ normal(0, 10)
## b_In_sigma ~ normal(0, 10)
## b_Sc ~ normal(0, 10)
## b_Sc_sigma ~ normal(0, 10)
## b_Std ~ normal(0, 10)
## b_Std_sigma ~ normal(0, 10)
## b_Th ~ normal(0, 10)
## b_Th_sigma ~ normal(0, 10)
## b_Y ~ normal(0, 10)
## b_Y_sigma ~ normal(0, 10)
## Intercept_Alt ~ normal(0, 10)
## Intercept_Alt_sigma ~ normal(2, 1)
## Intercept_Be ~ normal(0, 10)
## Intercept_Be_sigma ~ normal(2, 1)
## Intercept_Co ~ normal(0, 10)

```

```

## Intercept_Co_sigma ~ normal(2, 1)
## Intercept_Ho1 ~ normal(0, 10)
## Intercept_Ho1_sigma ~ normal(2, 1)
## Intercept_Ho2 ~ normal(0, 10)
## Intercept_Ho2_sigma ~ normal(2, 1)
## Intercept_In ~ normal(0, 10)
## Intercept_In_sigma ~ normal(2, 1)
## Intercept_Sc ~ normal(0, 10)
## Intercept_Sc_sigma ~ normal(2, 1)
## Intercept_Std ~ normal(0, 10)
## Intercept_Std_sigma ~ normal(2, 1)
## Intercept_Th ~ normal(0, 10)
## Intercept_Th_sigma ~ normal(2, 1)
## Intercept_Y ~ normal(0, 10)
## Intercept_Y_sigma ~ normal(2, 1)
## L ~ lkj_corr_cholesky(1)
## Lrescor ~ lkj_corr_cholesky(1)
## sd_Alt ~ normal(0, 10)
## sd_Alt_sigma ~ normal(0, 10)
## sd_Be ~ normal(0, 10)
## sd_Be_sigma ~ normal(0, 10)
## sd_Co ~ normal(0, 10)
## sd_Co_sigma ~ normal(0, 10)
## sd_Ho1 ~ normal(0, 10)
## sd_Ho1_sigma ~ normal(0, 10)
## sd_Ho2 ~ normal(0, 10)
## sd_Ho2_sigma ~ normal(0, 10)
## sd_In ~ normal(0, 10)
## sd_In_sigma ~ normal(0, 10)
## sd_Sc ~ normal(0, 10)
## sd_Sc_sigma ~ normal(0, 10)
## sd_Std ~ normal(0, 10)
## sd_Std_sigma ~ normal(0, 10)
## sd_Th ~ normal(0, 10)
## sd_Th_sigma ~ normal(0, 10)
## sd_Y ~ normal(0, 10)
## sd_Y_sigma ~ normal(0, 10)
##
## Group-Level Effects:
## ~day_expt (Number of levels: 8)
##
##           Estimate Est.Error 1-95% CI u-95% CI Rhat
## sd(Std_Intercept)      0.20    0.15    0.01    0.56 1.00
## sd(Std_tuneHHe)        0.73    0.43    0.09    1.78 1.00
## sd(sigma_Std_Intercept) 0.26    0.11    0.12    0.55 1.00
## sd(Alt_Intercept)     1.99    0.76    1.07    3.98 1.00
## sd(Alt_tuneHHe)       3.06    1.11    1.64    5.94 1.00
## sd(sigma_Alt_Intercept) 0.29    0.12    0.13    0.59 1.00
## sd(Ho2_Intercept)     1.50    0.57    0.80    2.98 1.00
## sd(Ho2_tuneHHe)       3.08    1.13    1.64    5.86 1.00
## sd(sigma_Ho2_Intercept) 0.41    0.16    0.21    0.80 1.00
## sd(In_Intercept)      3.59    1.22    2.00    6.76 1.00
## sd(In_tuneHHe)        2.14    0.83    0.96    4.18 1.00
## sd(sigma_In_Intercept) 0.24    0.09    0.13    0.48 1.00
## sd(Sc_Intercept)      2.56    0.88    1.43    4.83 1.00

```

```

## sd(Sc_tuneHHe)                4.03      1.33      2.21      7.45 1.00
## sd(sigma_Sc_Intercept)        0.31      0.13      0.15      0.62 1.00
## sd(Y_Intercept)               3.37      1.10      1.93      6.08 1.00
## sd(Y_tuneHHe)                 3.19      1.13      1.71      5.95 1.00
## sd(sigma_Y_Intercept)         0.26      0.10      0.14      0.52 1.00
## sd(Be_Intercept)              3.41      1.15      1.87      6.33 1.00
## sd(Be_tuneHHe)                5.49      1.83      3.04     10.20 1.00
## sd(sigma_Be_Intercept)        0.40      0.14      0.22      0.74 1.00
## sd(Co_Intercept)              3.11      0.99      1.75      5.64 1.00
## sd(Co_tuneHHe)                4.06      1.35      2.24      7.41 1.00
## sd(sigma_Co_Intercept)        0.38      0.14      0.21      0.75 1.00
## sd(Th_Intercept)              6.61      2.14      3.61     11.83 1.00
## sd(Th_tuneHHe)                2.20      1.36      0.17      5.41 1.00
## sd(sigma_Th_Intercept)        0.34      0.13      0.18      0.65 1.00
## sd(Ho1_Intercept)             6.12      1.95      3.40     11.04 1.00
## sd(Ho1_tuneHHe)              2.73      1.28      0.92      5.89 1.00
## sd(sigma_Ho1_Intercept)       0.31      0.11      0.17      0.60 1.00
## cor(Std_Intercept,Std_tuneHHe) -0.14     0.54    -0.95     0.90 1.00
## cor(Alt_Intercept,Alt_tuneHHe) -0.03     0.36    -0.69     0.65 1.00
## cor(Ho2_Intercept,Ho2_tuneHHe)  0.05     0.35    -0.61     0.68 1.00
## cor(In_Intercept,In_tuneHHe)   0.55     0.31    -0.21     0.95 1.00
## cor(Sc_Intercept,Sc_tuneHHe)   0.64     0.24     0.02     0.94 1.00
## cor(Y_Intercept,Y_tuneHHe)     0.61     0.26    -0.05     0.94 1.00
## cor(Be_Intercept,Be_tuneHHe)   0.54     0.29    -0.16     0.92 1.00
## cor(Co_Intercept,Co_tuneHHe)   0.81     0.17     0.32     0.98 1.00
## cor(Th_Intercept,Th_tuneHHe)   0.34     0.51    -0.75     0.98 1.00
## cor(Ho1_Intercept,Ho1_tuneHHe)  0.60     0.33    -0.24     0.97 1.00
##                               Bulk_ESS Tail_ESS
## sd(Std_Intercept)             2023    2491
## sd(Std_tuneHHe)               1895    2130
## sd(sigma_Std_Intercept)       2161    2976
## sd(Alt_Intercept)             2048    2663
## sd(Alt_tuneHHe)               2586    3202
## sd(sigma_Alt_Intercept)       1964    3133
## sd(Ho2_Intercept)             1975    2886
## sd(Ho2_tuneHHe)               2561    3374
## sd(sigma_Ho2_Intercept)       1736    2943
## sd(In_Intercept)              3047    3031
## sd(In_tuneHHe)                2311    3087
## sd(sigma_In_Intercept)        1872    2293
## sd(Sc_Intercept)              2428    3474
## sd(Sc_tuneHHe)                2705    3566
## sd(sigma_Sc_Intercept)        1788    3289
## sd(Y_Intercept)               2632    3656
## sd(Y_tuneHHe)                 2602    2807
## sd(sigma_Y_Intercept)         2572    3179
## sd(Be_Intercept)              2539    2813
## sd(Be_tuneHHe)                2913    3291
## sd(sigma_Be_Intercept)        2361    3635
## sd(Co_Intercept)              2150    2914
## sd(Co_tuneHHe)                2139    2661
## sd(sigma_Co_Intercept)        2448    2828
## sd(Th_Intercept)              3006    4080
## sd(Th_tuneHHe)                1377    1433

```



```

## sd(sigma_Th_Intercept)          2676    2993
## sd(Ho1_Intercept)               3029    3498
## sd(Ho1_tuneHHe)                 1798    1566
## sd(sigma_Ho1_Intercept)         2821    3178
## cor(Std_Intercept,Std_tuneHHe)  1616    2705
## cor(Alt_Intercept,Alt_tuneHHe)  2285    2654
## cor(Ho2_Intercept,Ho2_tuneHHe)  2641    3307
## cor(In_Intercept,In_tuneHHe)    2179    2552
## cor(Sc_Intercept,Sc_tuneHHe)    2476    3196
## cor(Y_Intercept,Y_tuneHHe)      2170    2806
## cor(Be_Intercept,Be_tuneHHe)    2634    2910
## cor(Co_Intercept,Co_tuneHHe)    2504    3642
## cor(Th_Intercept,Th_tuneHHe)    2310    3105
## cor(Ho1_Intercept,Ho1_tuneHHe)  2140    2577
##
## ~matrix (Number of levels: 22)
##
## Estimate Est.Error 1-95% CI u-95% CI Rhat
## sd(Std_Intercept)              0.09    0.07    0.00    0.26 1.00
## sd(Std_tuneHHe)                 0.29    0.20    0.01    0.75 1.00
## sd(sigma_Std_Intercept)         0.05    0.04    0.00    0.13 1.00
## sd(Alt_Intercept)               0.17    0.10    0.01    0.39 1.00
## sd(Alt_tuneHHe)                 0.33    0.21    0.01    0.80 1.00
## sd(sigma_Alt_Intercept)         0.09    0.06    0.00    0.22 1.00
## sd(Ho2_Intercept)               0.44    0.10    0.25    0.68 1.00
## sd(Ho2_tuneHHe)                 0.82    0.25    0.32    1.33 1.00
## sd(sigma_Ho2_Intercept)         0.04    0.03    0.00    0.12 1.00
## sd(In_Intercept)                0.08    0.05    0.00    0.19 1.00
## sd(In_tuneHHe)                  0.32    0.14    0.04    0.62 1.01
## sd(sigma_In_Intercept)          0.03    0.02    0.00    0.06 1.00
## sd(Sc_Intercept)                0.76    0.14    0.53    1.07 1.00
## sd(Sc_tuneHHe)                  1.63    0.36    1.05    2.45 1.00
## sd(sigma_Sc_Intercept)          0.14    0.04    0.07    0.22 1.00
## sd(Y_Intercept)                 0.48    0.09    0.34    0.69 1.00
## sd(Y_tuneHHe)                   1.00    0.21    0.67    1.49 1.00
## sd(sigma_Y_Intercept)           0.04    0.02    0.00    0.08 1.00
## sd(Be_Intercept)                0.88    0.18    0.60    1.29 1.00
## sd(Be_tuneHHe)                  1.83    0.42    1.12    2.77 1.00
## sd(sigma_Be_Intercept)          0.11    0.04    0.03    0.19 1.00
## sd(Co_Intercept)                0.50    0.10    0.34    0.73 1.00
## sd(Co_tuneHHe)                  0.67    0.16    0.40    1.04 1.00
## sd(sigma_Co_Intercept)          0.02    0.02    0.00    0.06 1.00
## sd(Th_Intercept)                0.22    0.07    0.09    0.38 1.00
## sd(Th_tuneHHe)                  0.92    0.23    0.54    1.46 1.00
## sd(sigma_Th_Intercept)          0.01    0.01    0.00    0.04 1.00
## sd(Ho1_Intercept)               0.05    0.04    0.00    0.15 1.00
## sd(Ho1_tuneHHe)                 0.20    0.16    0.01    0.58 1.00
## sd(sigma_Ho1_Intercept)         0.01    0.01    0.00    0.03 1.00
## cor(Std_Intercept,Std_tuneHHe) -0.05    0.57   -0.96    0.94 1.00
## cor(Alt_Intercept,Alt_tuneHHe) -0.05    0.55   -0.95    0.93 1.00
## cor(Ho2_Intercept,Ho2_tuneHHe) -0.49    0.25   -0.90    0.09 1.00
## cor(In_Intercept,In_tuneHHe)    0.38    0.50   -0.78    0.98 1.01
## cor(Sc_Intercept,Sc_tuneHHe)    0.79    0.13    0.47    0.97 1.00
## cor(Y_Intercept,Y_tuneHHe)      0.98    0.03    0.91    1.00 1.00
## cor(Be_Intercept,Be_tuneHHe)    0.86    0.12    0.55    0.99 1.00

```

```

## cor(Co_Intercept,Co_tuneHHe)      0.91      0.09      0.66      1.00 1.00
## cor(Th_Intercept,Th_tuneHHe)      0.68      0.24      0.09      0.98 1.00
## cor(Ho1_Intercept,Ho1_tuneHHe)     0.11      0.58     -0.94      0.97 1.00
##                                     Bulk_ESS Tail_ESS
## sd(Std_Intercept)                  3309     2993
## sd(Std_tuneHHe)                    1919     2078
## sd(sigma_Std_Intercept)            3790     3349
## sd(Alt_Intercept)                  1623     2427
## sd(Alt_tuneHHe)                    2135     2694
## sd(sigma_Alt_Intercept)            1878     2328
## sd(Ho2_Intercept)                  1495     2113
## sd(Ho2_tuneHHe)                    1398     1712
## sd(sigma_Ho2_Intercept)            2848     2750
## sd(In_Intercept)                   933      2282
## sd(In_tuneHHe)                     965     1218
## sd(sigma_In_Intercept)              970     1189
## sd(Sc_Intercept)                   1544     2460
## sd(Sc_tuneHHe)                     1514     2851
## sd(sigma_Sc_Intercept)             2141     2887
## sd(Y_Intercept)                    1212     1979
## sd(Y_tuneHHe)                      944     2347
## sd(sigma_Y_Intercept)              1194     1901
## sd(Be_Intercept)                   2024     2490
## sd(Be_tuneHHe)                     2448     3547
## sd(sigma_Be_Intercept)             1395      826
## sd(Co_Intercept)                   1626     3535
## sd(Co_tuneHHe)                     1928     3857
## sd(sigma_Co_Intercept)             2209     3193
## sd(Th_Intercept)                   1763     2230
## sd(Th_tuneHHe)                     2108     3338
## sd(sigma_Th_Intercept)             1639     1765
## sd(Ho1_Intercept)                  2237     3005
## sd(Ho1_tuneHHe)                    1923     3223
## sd(sigma_Ho1_Intercept)            2963     3266
## cor(Std_Intercept,Std_tuneHHe)     3294     3908
## cor(Alt_Intercept,Alt_tuneHHe)     2995     3500
## cor(Ho2_Intercept,Ho2_tuneHHe)     2690     2734
## cor(In_Intercept,In_tuneHHe)       856     1623
## cor(Sc_Intercept,Sc_tuneHHe)      1362     2027
## cor(Y_Intercept,Y_tuneHHe)        2207     2840
## cor(Be_Intercept,Be_tuneHHe)       1969     2476
## cor(Co_Intercept,Co_tuneHHe)       2184     3588
## cor(Th_Intercept,Th_tuneHHe)      1070     2002
## cor(Ho1_Intercept,Ho1_tuneHHe)     2505     3963
##
## Population-Level Effects:
##                                     Estimate Est.Error l-95% CI u-95% CI Rhat Bulk_ESS Tail_ESS
## Std_Intercept                      -0.43      0.12     -0.68     -0.18 1.00     4631     4148
## sigma_Std_Intercept                 0.04      0.11     -0.18      0.27 1.00     2280     2943
## Alt_Intercept                       -0.84      0.74     -2.33      0.55 1.00     1278     2176
## sigma_Alt_Intercept                 -0.00      0.12     -0.24      0.25 1.00     2179     2536
## Ho2_Intercept                       -1.45      0.59     -2.64     -0.30 1.00     1405     2406
## sigma_Ho2_Intercept                 0.10      0.17     -0.20      0.47 1.00     1721     1755
## In_Intercept                        -3.53      1.28     -6.03     -0.93 1.00     1297     2100

```

```

## sigma_In_Intercept      0.87      0.10      0.67      1.08 1.00      1572      2649
## Sc_Intercept            -2.99      0.96     -4.83     -1.03 1.00      1271      1997
## sigma_Sc_Intercept      0.26      0.13      0.00      0.53 1.00      1680      2802
## Y_Intercept             -3.72      1.24     -6.13     -1.17 1.00      1108      1810
## sigma_Y_Intercept       0.55      0.11      0.35      0.77 1.00      1511      2666
## Be_Intercept            -2.70      1.25     -5.23     -0.13 1.00      1148      1915
## sigma_Be_Intercept      0.78      0.16      0.47      1.10 1.00      1558      2316
## Co_Intercept            -2.71      1.13     -4.93     -0.49 1.00       982      1556
## sigma_Co_Intercept      0.50      0.15      0.20      0.80 1.00      1361      2244
## Th_Intercept            -5.65      2.40    -10.44     -0.81 1.00      1175      2167
## sigma_Th_Intercept      1.61      0.13      1.35      1.88 1.00      1642      2409
## Ho1_Intercept           -5.19      2.22     -9.40     -0.61 1.01      1217      2025
## sigma_Ho1_Intercept     1.38      0.12      1.13      1.63 1.00      1242      2307
## Std_tuneHHe             -0.20      0.37     -0.95      0.55 1.00      2614      2555
## sigma_Std_tuneHHe       0.72      0.07      0.57      0.86 1.00      7538      4530
## Alt_tuneHHe              0.33      1.14     -1.95      2.66 1.00      1693      2236
## sigma_Alt_tuneHHe       0.75      0.08      0.59      0.91 1.00      7881      4342
## Ho2_tuneHHe              0.40      1.21     -1.98      2.85 1.00      1758      2286
## sigma_Ho2_tuneHHe       1.09      0.07      0.95      1.22 1.00      4108      4355
## In_tuneHHe              -1.36      0.91     -3.13      0.46 1.00      2036      2492
## sigma_In_tuneHHe        0.85      0.04      0.77      0.94 1.00      2085      3435
## Sc_tuneHHe              -3.87      1.56     -7.00     -0.75 1.00      1483      2442
## sigma_Sc_tuneHHe        1.04      0.05      0.93      1.14 1.00      3680      4271
## Y_tuneHHe               -2.93      1.23     -5.39     -0.40 1.00      1374      2370
## sigma_Y_tuneHHe         0.90      0.04      0.82      0.98 1.00      2302      3511
## Be_tuneHHe              -2.70      2.06     -6.80      1.27 1.00      1474      2113
## sigma_Be_tuneHHe        1.29      0.05      1.19      1.40 1.00      3878      3928
## Co_tuneHHe              -1.99      1.52     -4.95      1.06 1.00      1094      1785
## sigma_Co_tuneHHe        1.13      0.04      1.05      1.20 1.00      2706      3871
## Th_tuneHHe              -1.35      1.34     -3.97      1.27 1.00      3117      3413
## sigma_Th_tuneHHe        0.96      0.04      0.88      1.05 1.00      2097      3126
## Ho1_tuneHHe             -2.39      1.31     -4.99      0.18 1.00      1912      2479
## sigma_Ho1_tuneHHe       0.97      0.04      0.89      1.06 1.00      2112      3310
##
## Residual Correlations:
##      Estimate Est.Error 1-95% CI u-95% CI Rhat Bulk_ESS Tail_ESS
## rescor(Std,Alt)      0.33      0.05      0.24      0.43 1.00      7984      5239
## rescor(Std,Ho2)      0.33      0.05      0.24      0.43 1.00      1765      3392
## rescor(Alt,Ho2)      0.33      0.05      0.23      0.43 1.00      2126      3028
## rescor(Std,In)       0.13      0.05      0.03      0.24 1.00      1308      2325
## rescor(Alt,In)       0.14      0.06      0.03      0.26 1.00      1445      1731
## rescor(Ho2,In)       0.70      0.04      0.62      0.77 1.00      1001      2253
## rescor(Std,Sc)       0.33      0.05      0.23      0.42 1.00      4229      4413
## rescor(Alt,Sc)       0.32      0.05      0.22      0.42 1.00      4442      3852
## rescor(Ho2,Sc)       0.55      0.05      0.44      0.64 1.00      2424      4012
## rescor(In,Sc)        0.34      0.07      0.21      0.48 1.00      1916      2593
## rescor(Std,Y)        0.21      0.05      0.11      0.31 1.00      1299      2000
## rescor(Alt,Y)        0.22      0.06      0.11      0.33 1.00      1468      1755
## rescor(Ho2,Y)        0.77      0.03      0.70      0.82 1.00       984      2149
## rescor(In,Y)         0.97      0.01      0.96      0.98 1.00      2194      3996
## rescor(Sc,Y)         0.53      0.06      0.42      0.64 1.00      2396      2850
## rescor(Std,Be)       0.20      0.05      0.09      0.30 1.00      1426      2485
## rescor(Alt,Be)       0.15      0.06      0.04      0.26 1.00      1688      2093
## rescor(Ho2,Be)       0.73      0.03      0.66      0.79 1.00      1391      2515

```

```

## rescor(In,Be)      0.78      0.03      0.72      0.83 1.00      2817      4456
## rescor(Sc,Be)     0.56      0.06      0.45      0.66 1.00      2119      3098
## rescor(Y,Be)      0.82      0.02      0.78      0.86 1.00      2971      4579
## rescor(Std,Co)    0.24      0.05      0.14      0.34 1.00      1301      2211
## rescor(Alt,Co)    0.21      0.06      0.10      0.32 1.00      1476      1741
## rescor(Ho2,Co)    0.82      0.03      0.76      0.86 1.00      1064      2150
## rescor(In,Co)     0.90      0.01      0.88      0.93 1.00      2640      4016
## rescor(Sc,Co)     0.60      0.05      0.49      0.70 1.00      2272      3110
## rescor(Y,Co)      0.95      0.01      0.93      0.96 1.00      2928      4582
## rescor(Be,Co)     0.93      0.01      0.91      0.95 1.00      3523      4767
## rescor(Std,Th)    0.04      0.05     -0.07     0.14 1.00      1384      2181
## rescor(Alt,Th)    0.04      0.06     -0.07     0.17 1.00      1490      1849
## rescor(Ho2,Th)    0.60      0.05      0.51      0.69 1.00      1097      2326
## rescor(In,Th)     0.96      0.00      0.95      0.97 1.00      3448      4487
## rescor(Sc,Th)     0.14      0.08     -0.01     0.29 1.00      1708      2289
## rescor(Y,Th)      0.88      0.02      0.85      0.91 1.00      2102      3407
## rescor(Be,Th)     0.74      0.03      0.67      0.80 1.00      2779      4175
## rescor(Co,Th)     0.83      0.02      0.79      0.87 1.00      2907      3799
## rescor(Std,Ho1)   0.06      0.05     -0.05     0.16 1.00      1397      2271
## rescor(Alt,Ho1)   0.06      0.06     -0.06     0.18 1.00      1508      1740
## rescor(Ho2,Ho1)   0.60      0.05      0.50      0.68 1.00      1124      2342
## rescor(In,Ho1)    0.96      0.00      0.95      0.97 1.00      3376      4708
## rescor(Sc,Ho1)    0.12      0.08     -0.03     0.27 1.00      1722      2412
## rescor(Y,Ho1)     0.88      0.02      0.85      0.91 1.00      2134      3432
## rescor(Be,Ho1)    0.73      0.03      0.65      0.79 1.00      2776      4333
## rescor(Co,Ho1)    0.82      0.02      0.78      0.86 1.00      2966      3909
## rescor(Th,Ho1)    1.00      0.00      1.00      1.00 1.00      6443      5604
##
## Draws were sampled using sampling(NUTS). For each parameter, Bulk_ESS
## and Tail_ESS are effective sample size measures, and Rhat is the potential
## scale reduction factor on split chains (at convergence, Rhat = 1).

```

Again, the HMC sampling looks to have gone well.

## Model checks

Next, the checks for the selenium model.

Density overlay

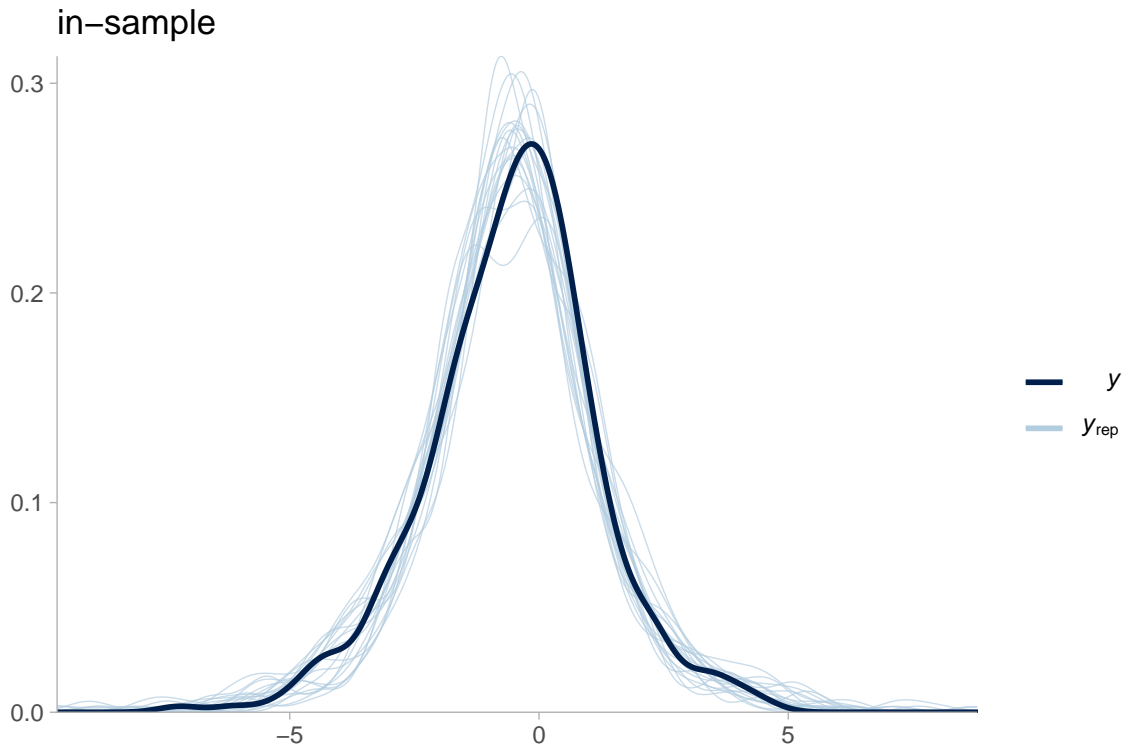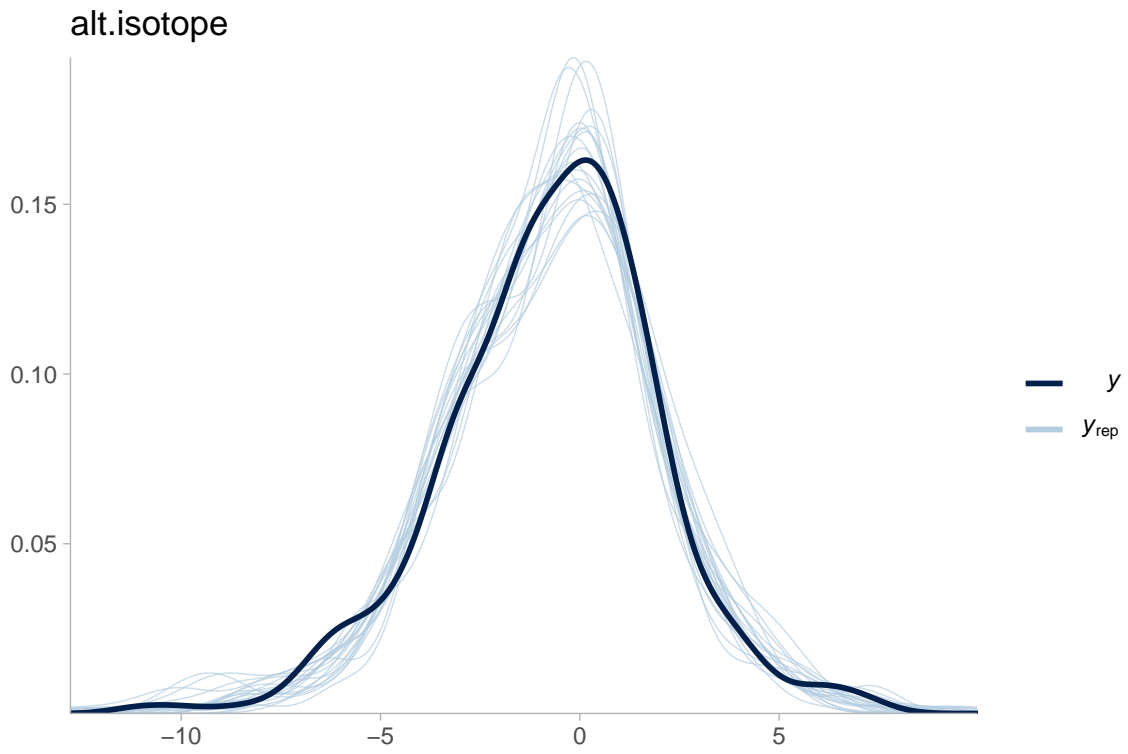

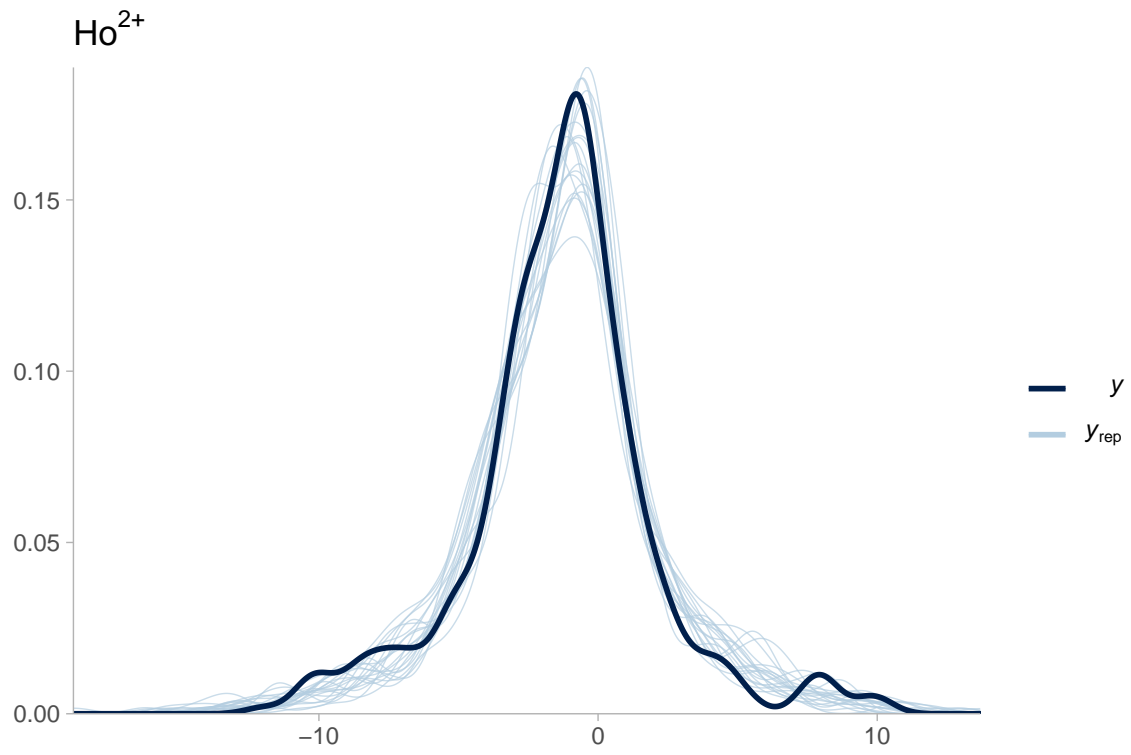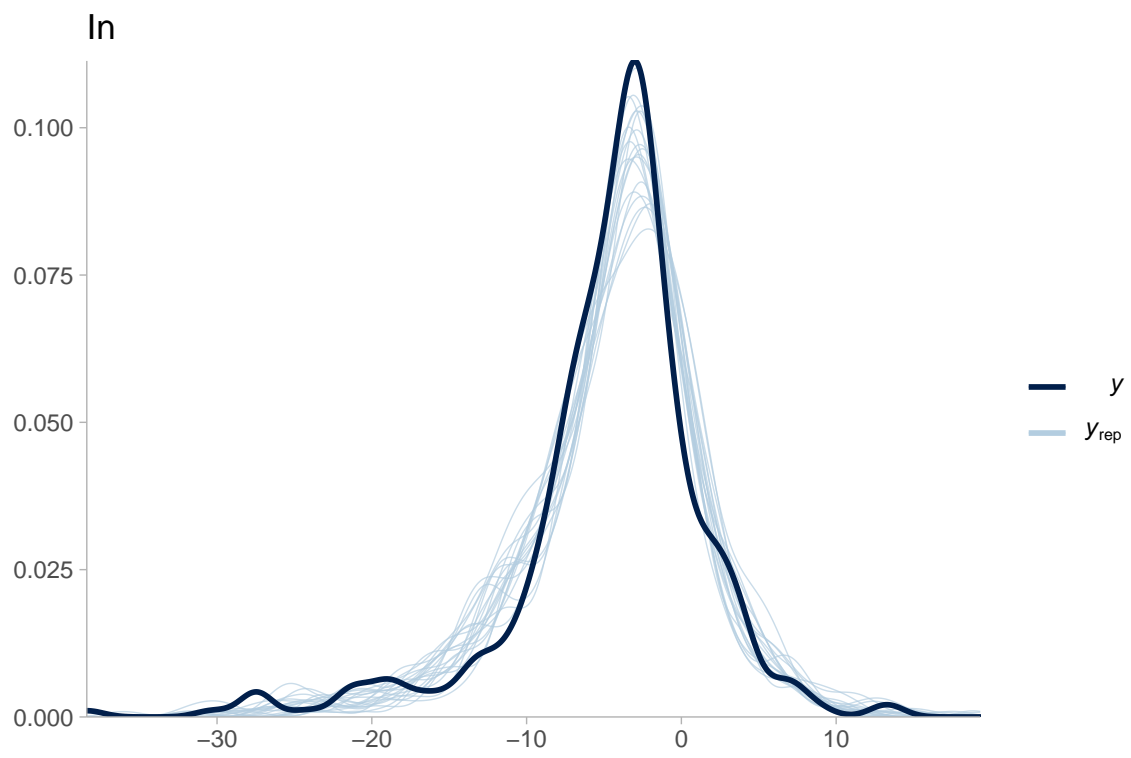

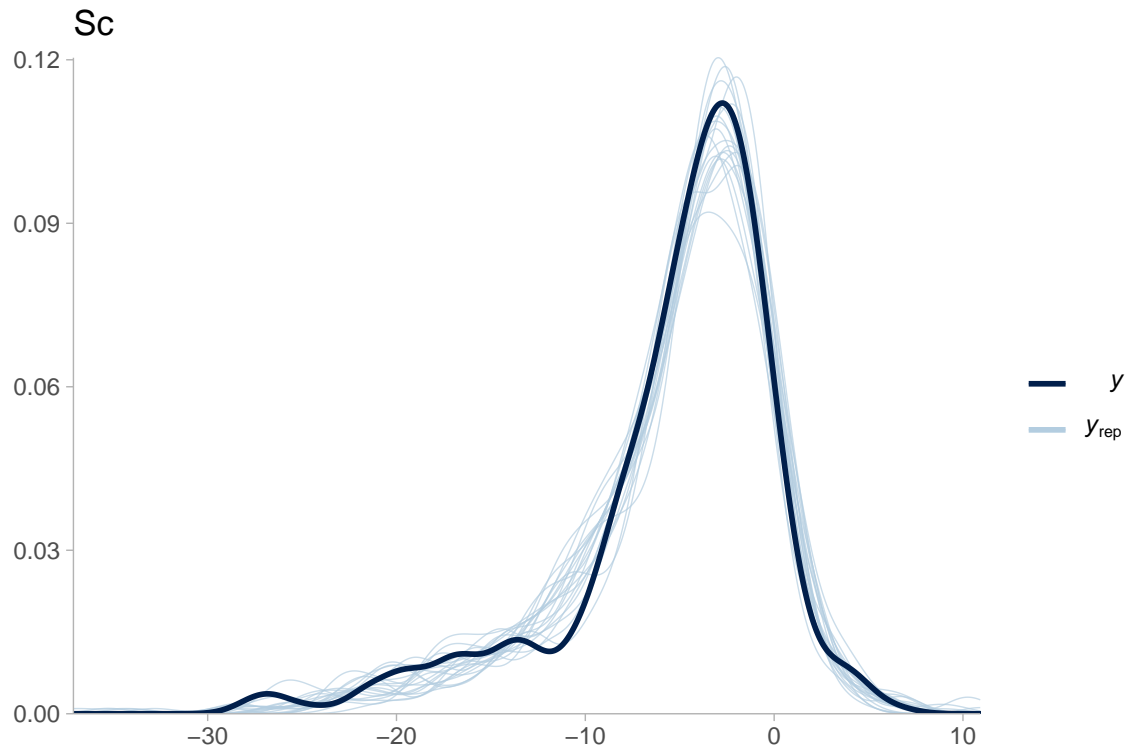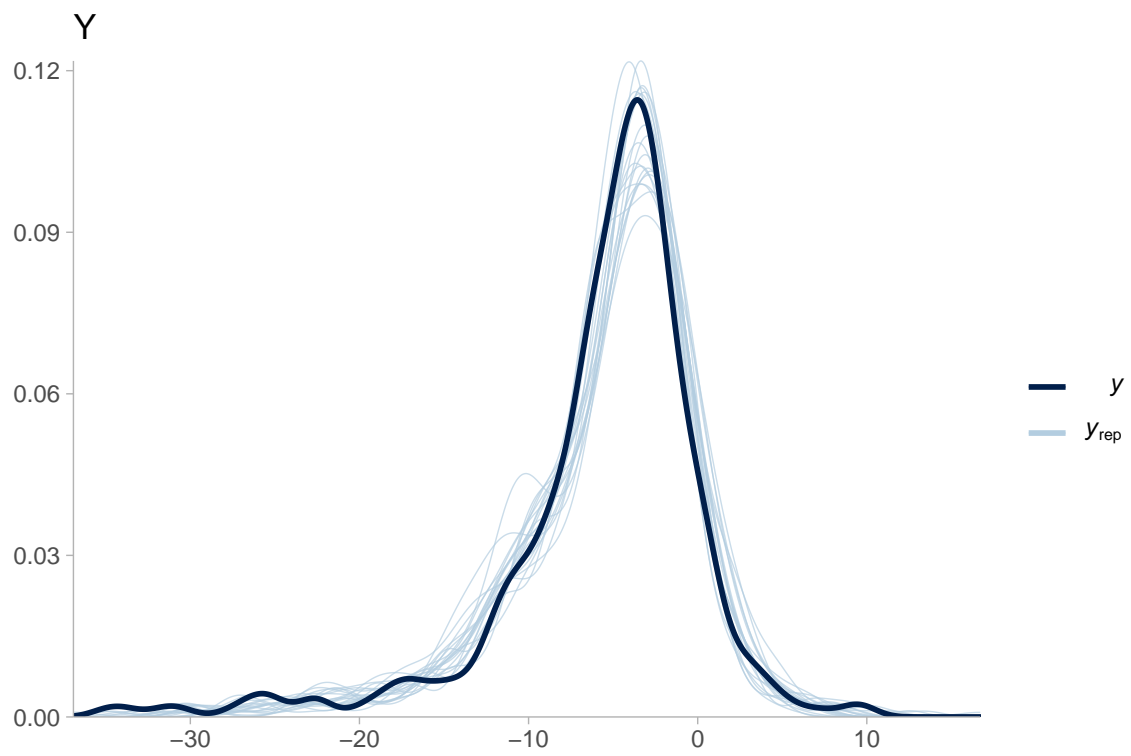

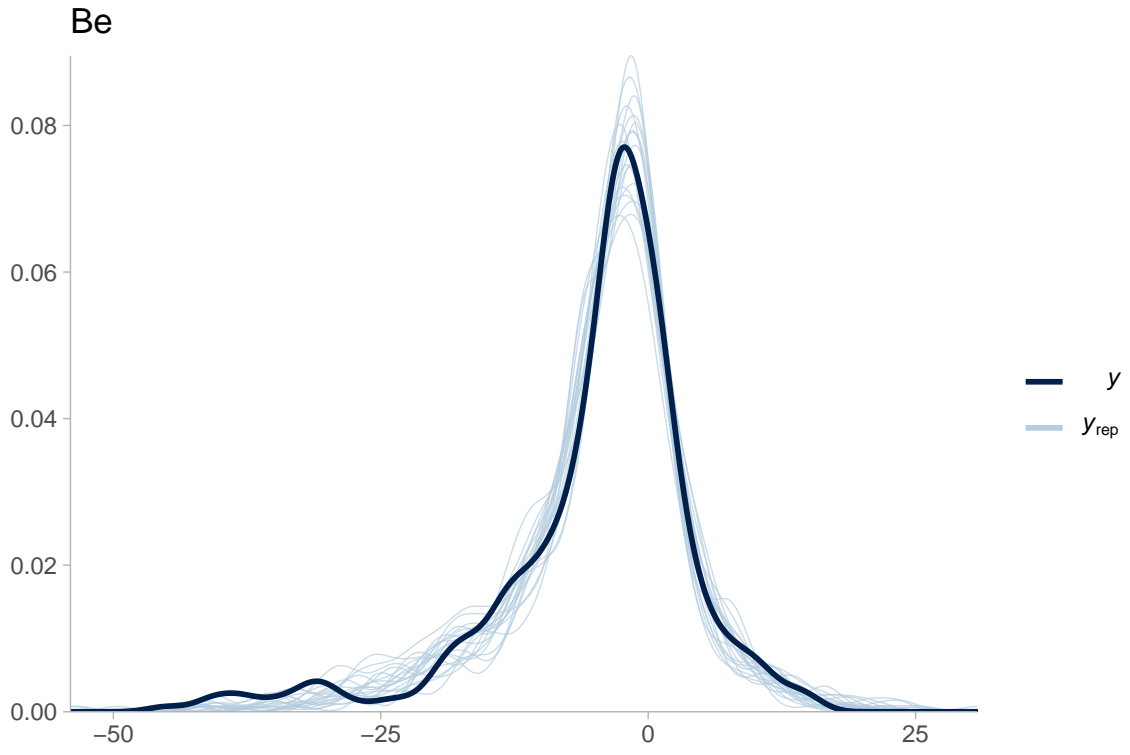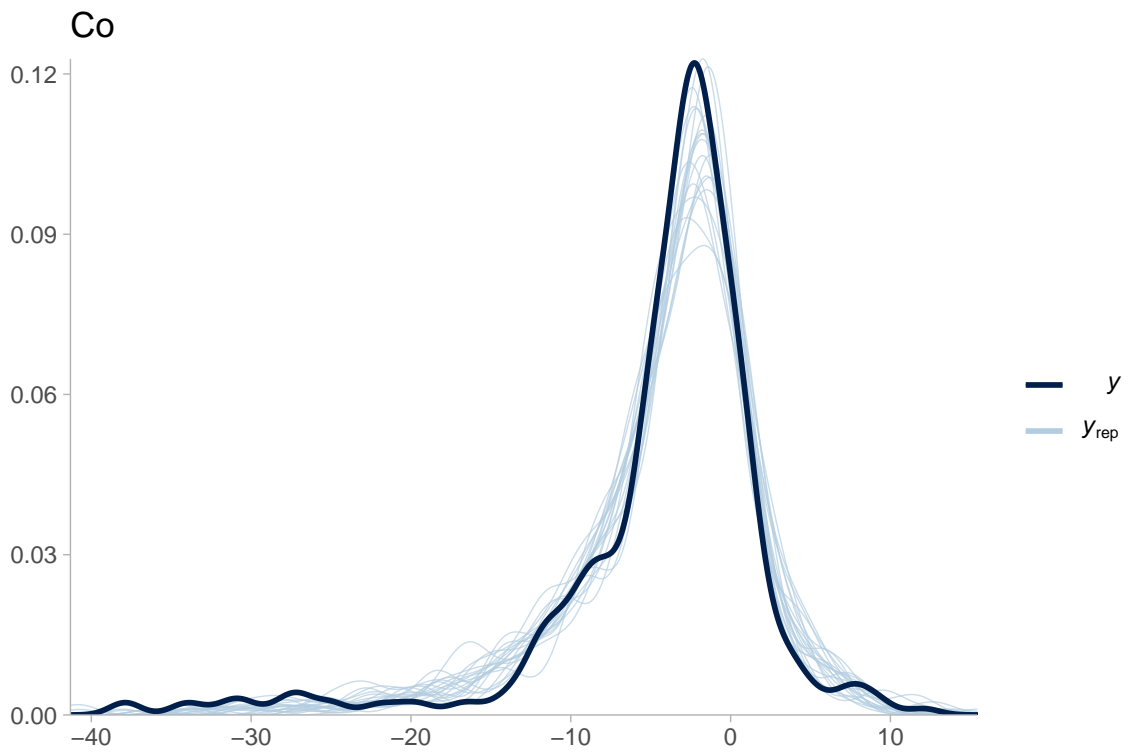



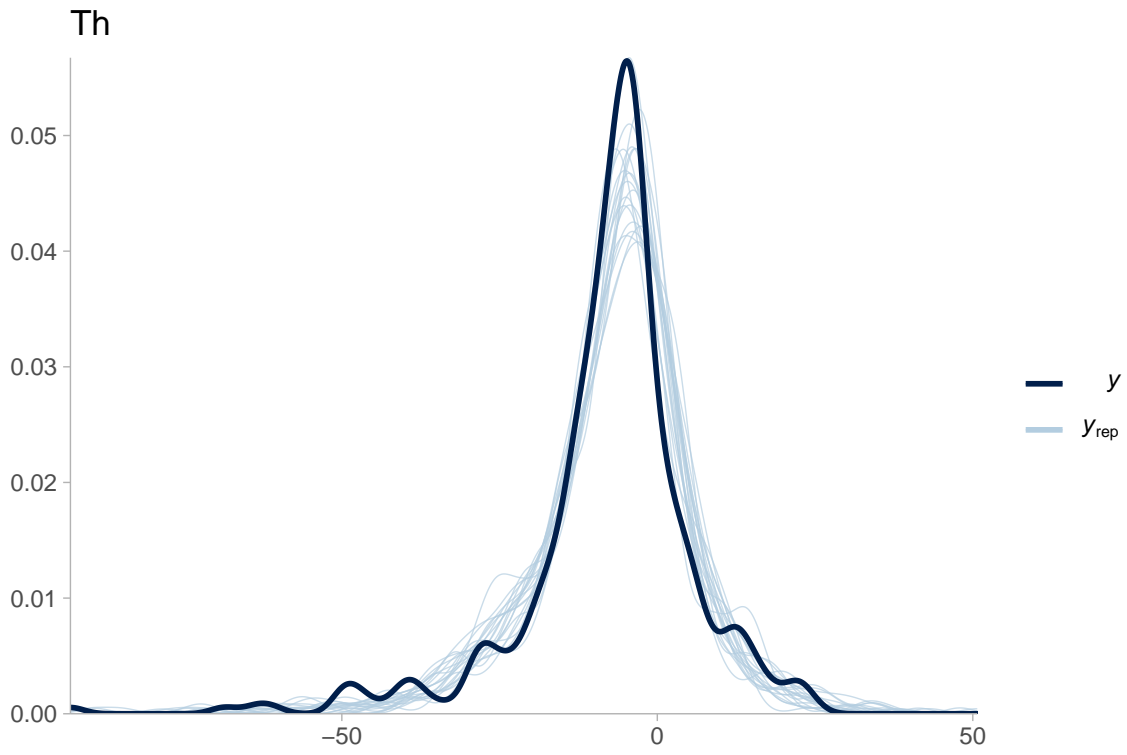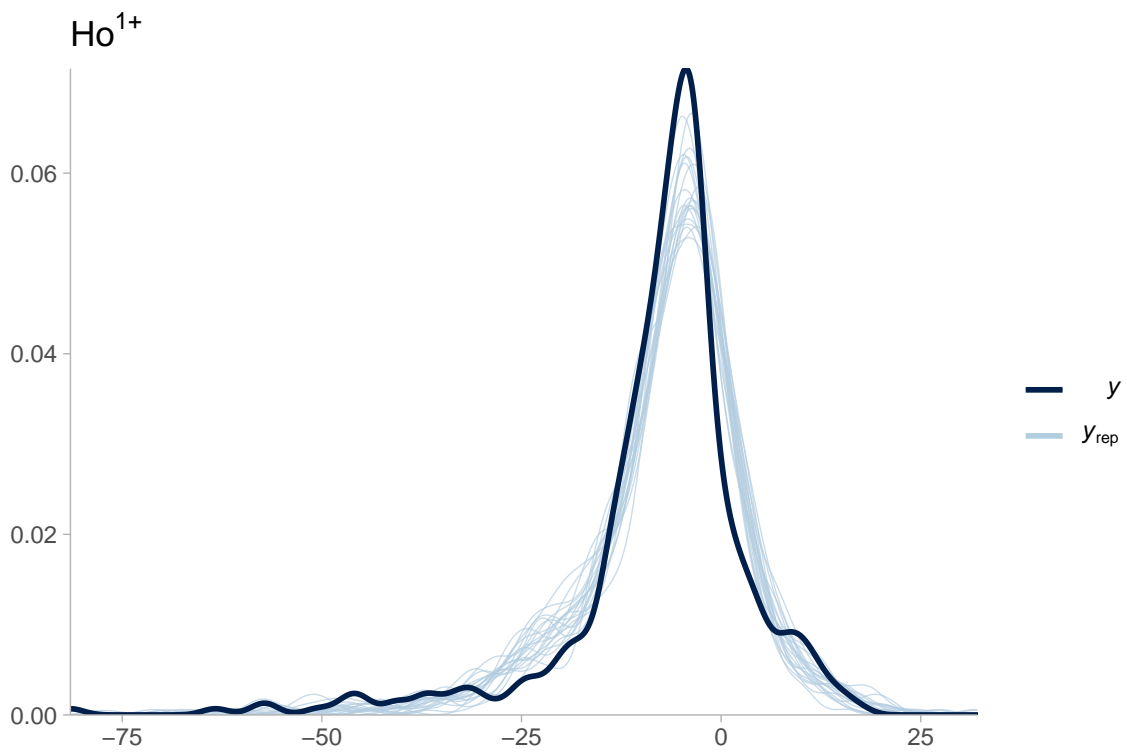

In this check, compared to the same one for arsenic, the same model structure appears to be doing a better job of replicating the observed data.

## Median

Next is a check comparing replicated medians to the observed medians.

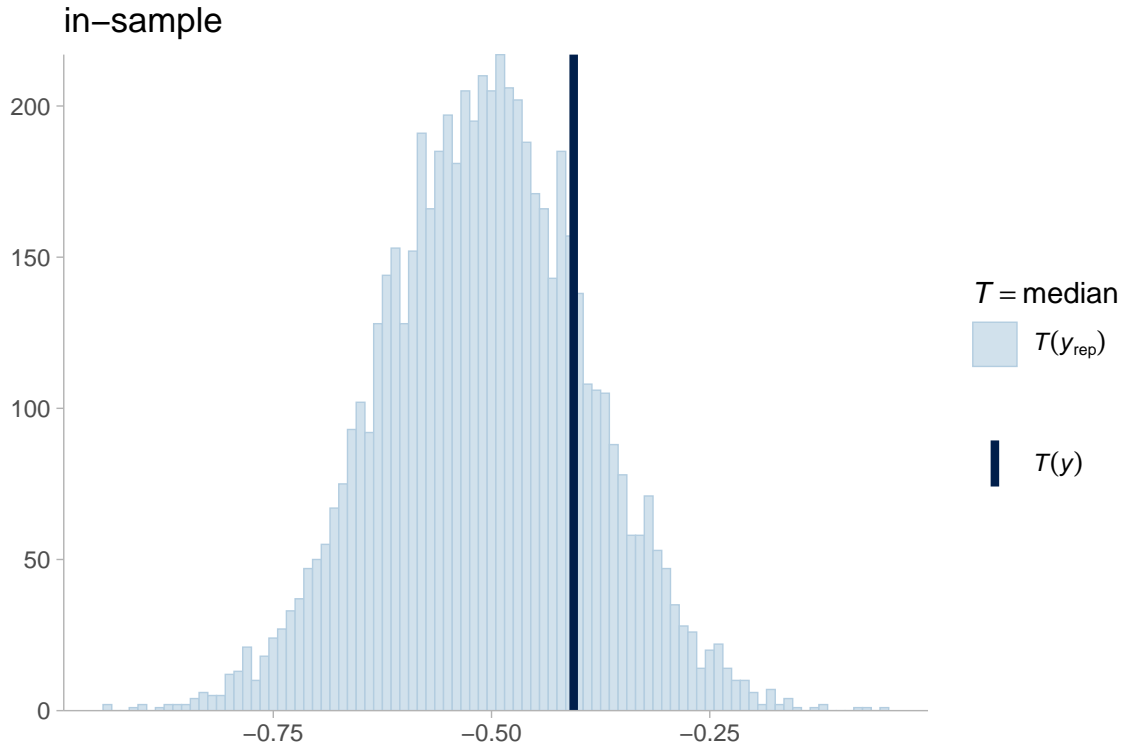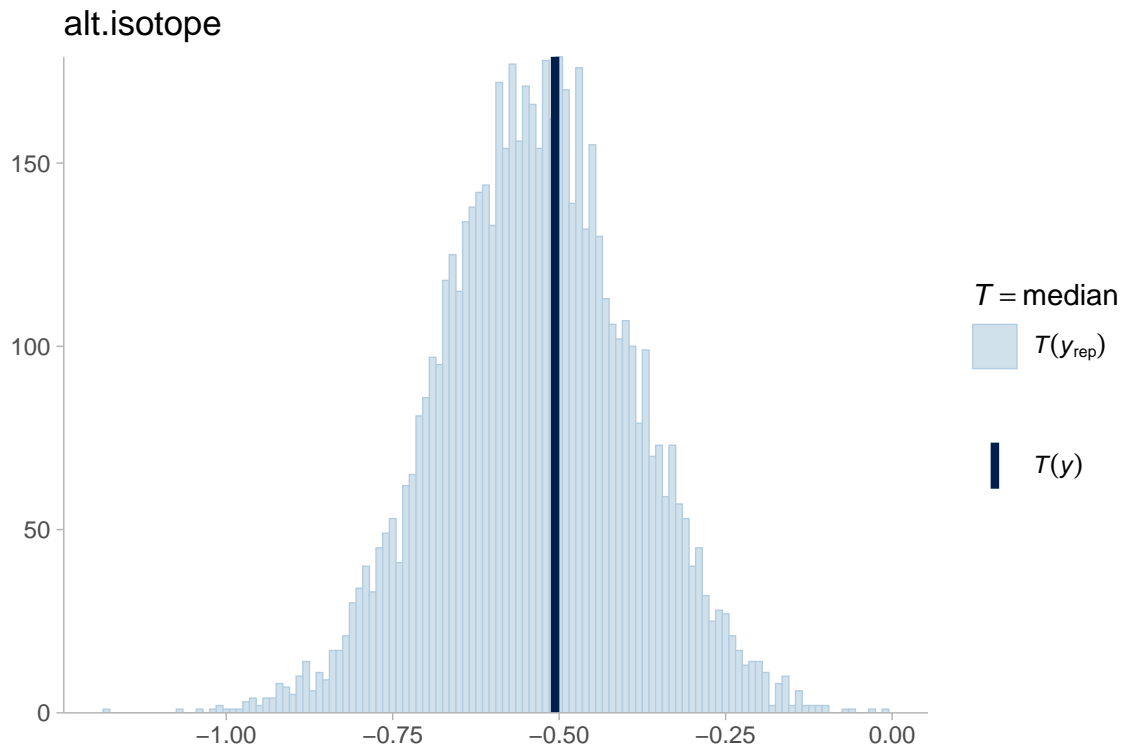

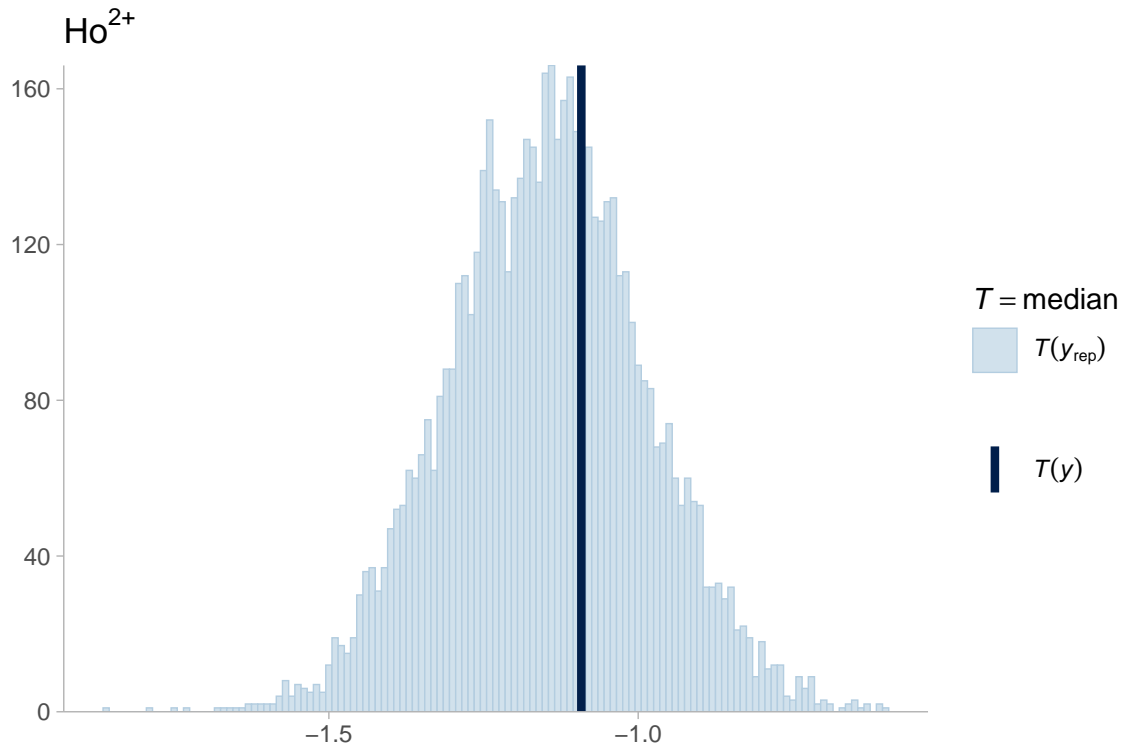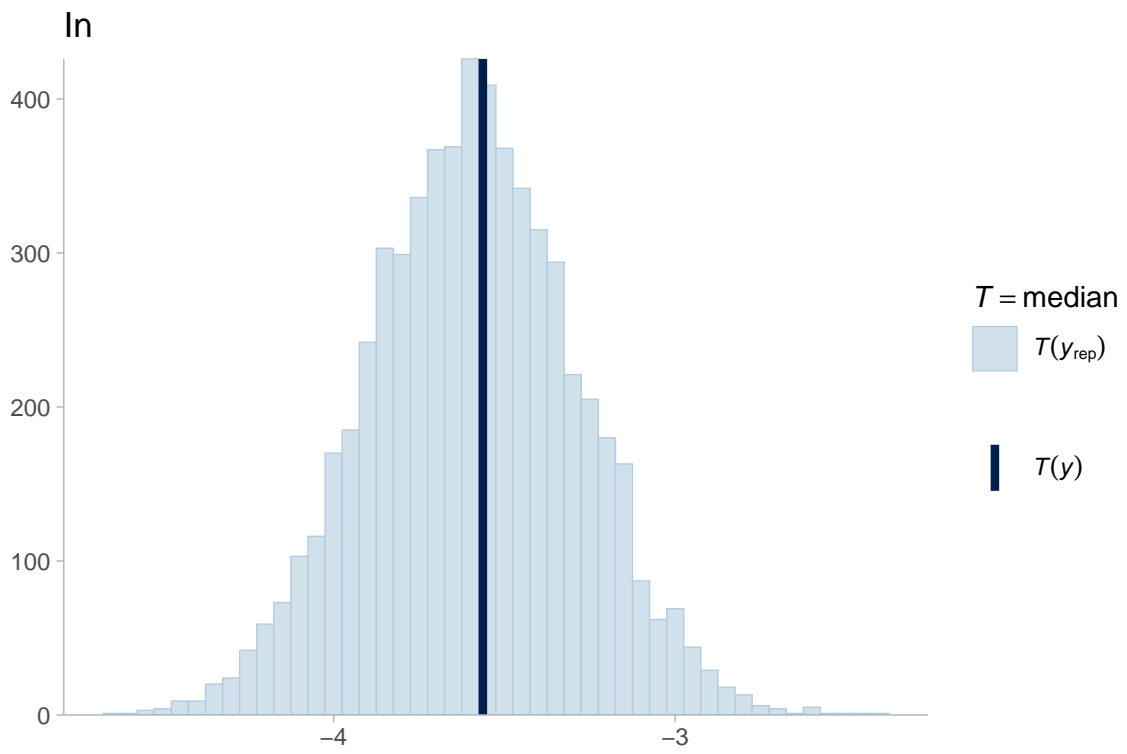

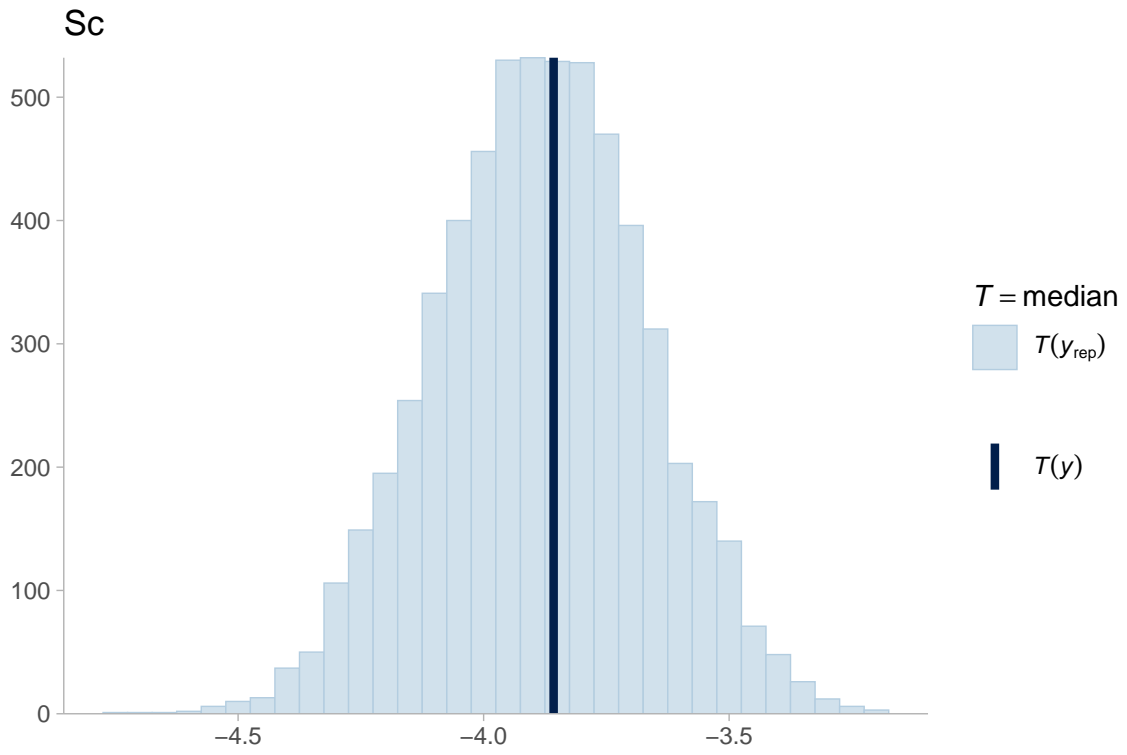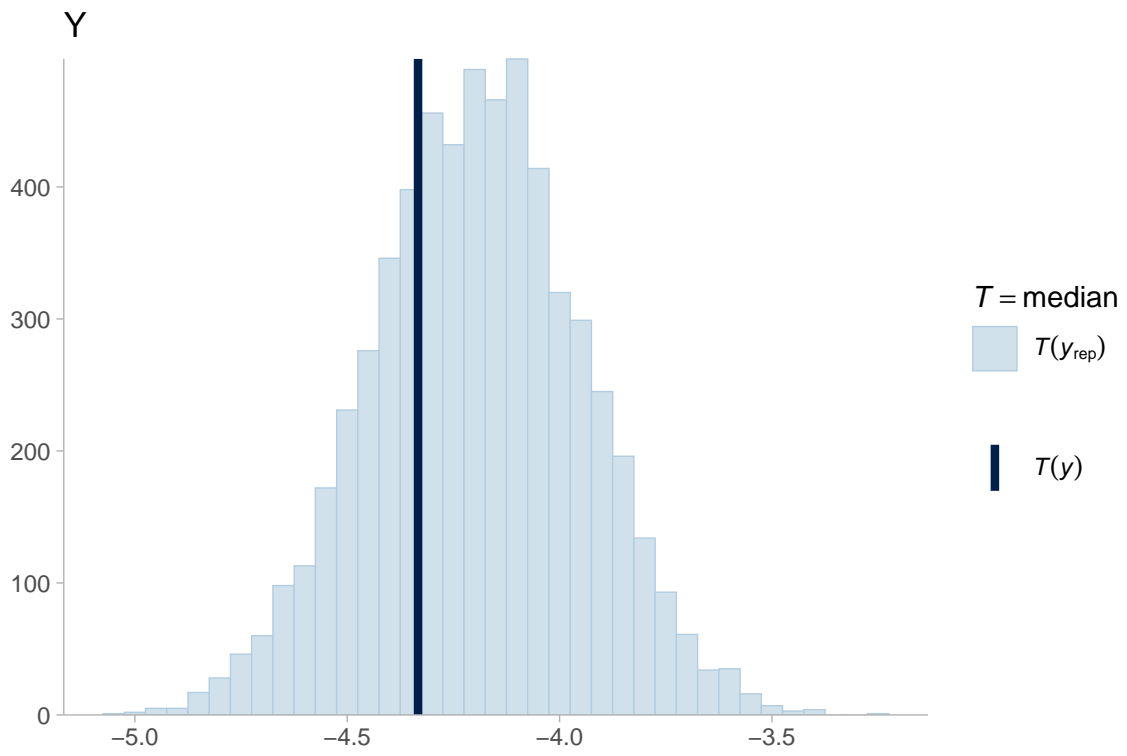

Be

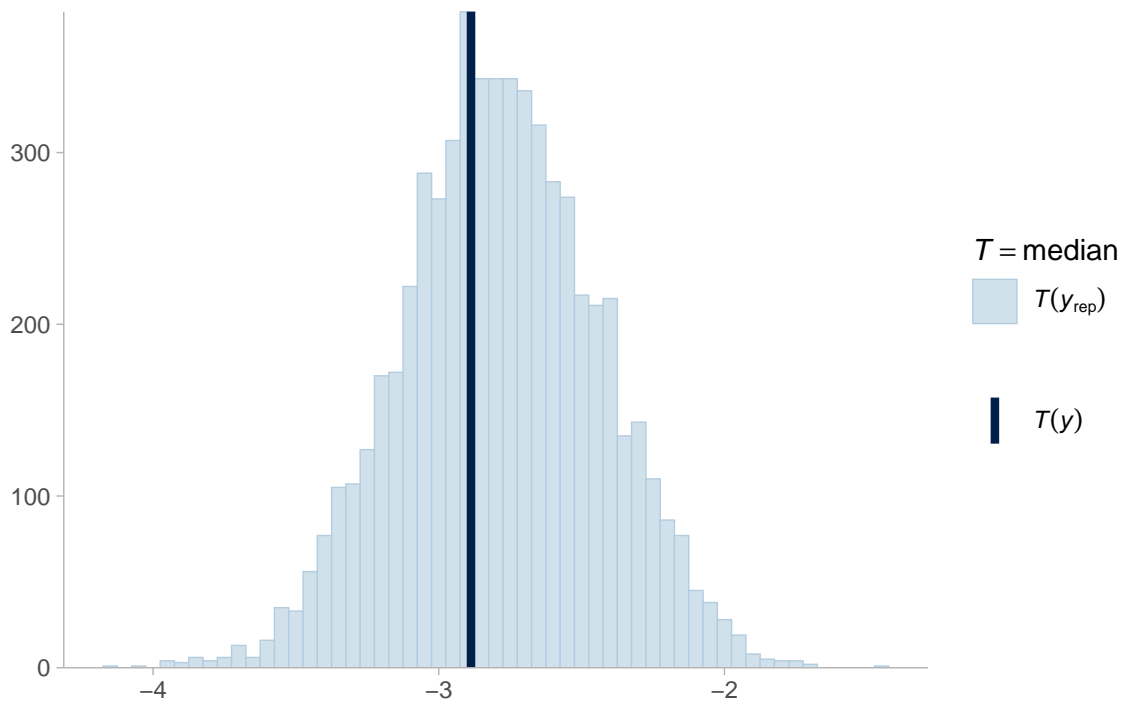

Co

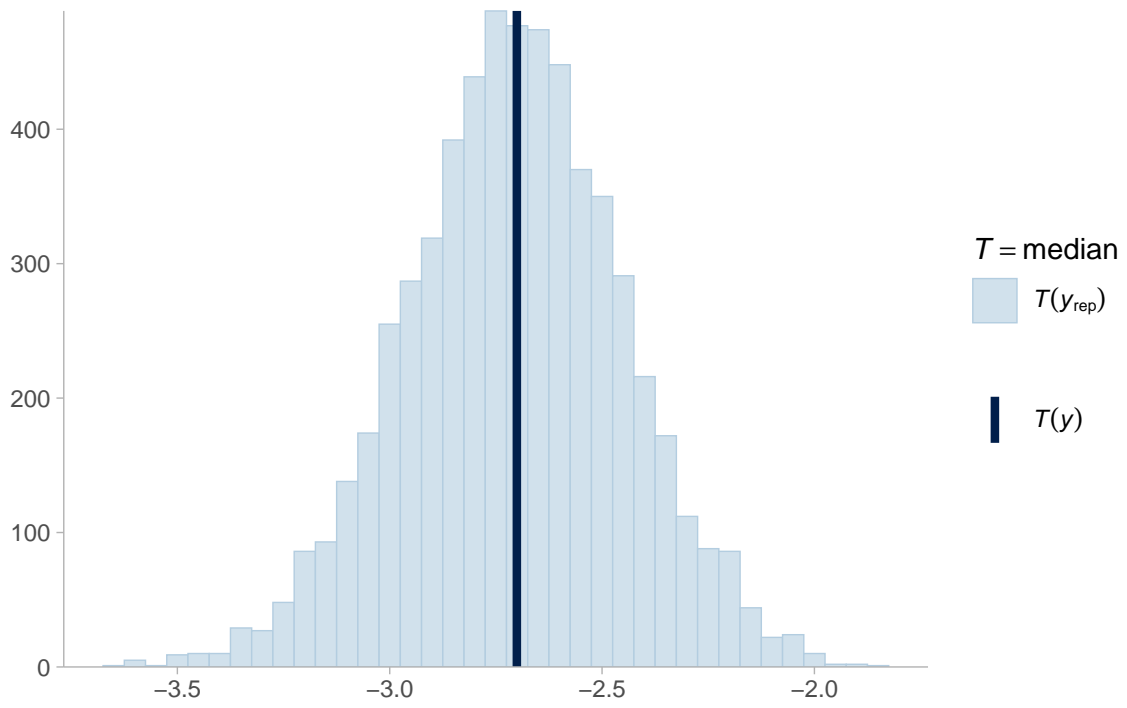

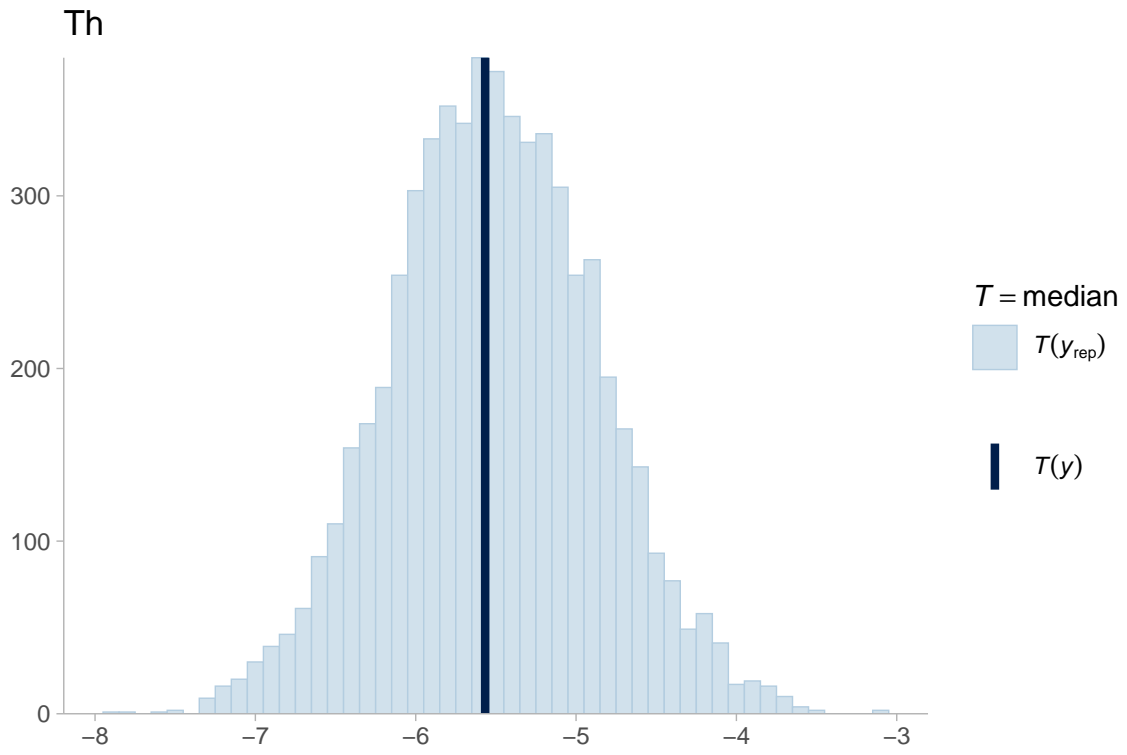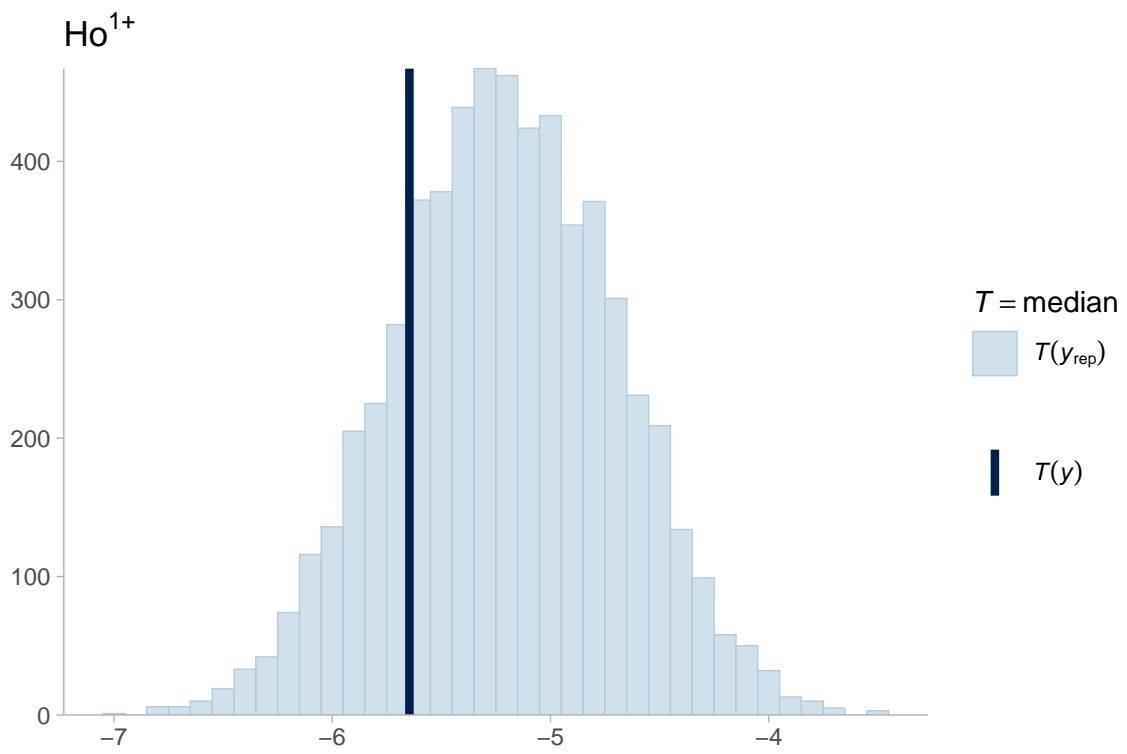

This check doesn't suggest any glaring issues.

## Min

Next is a check comparing replicated mins to the observed mins.

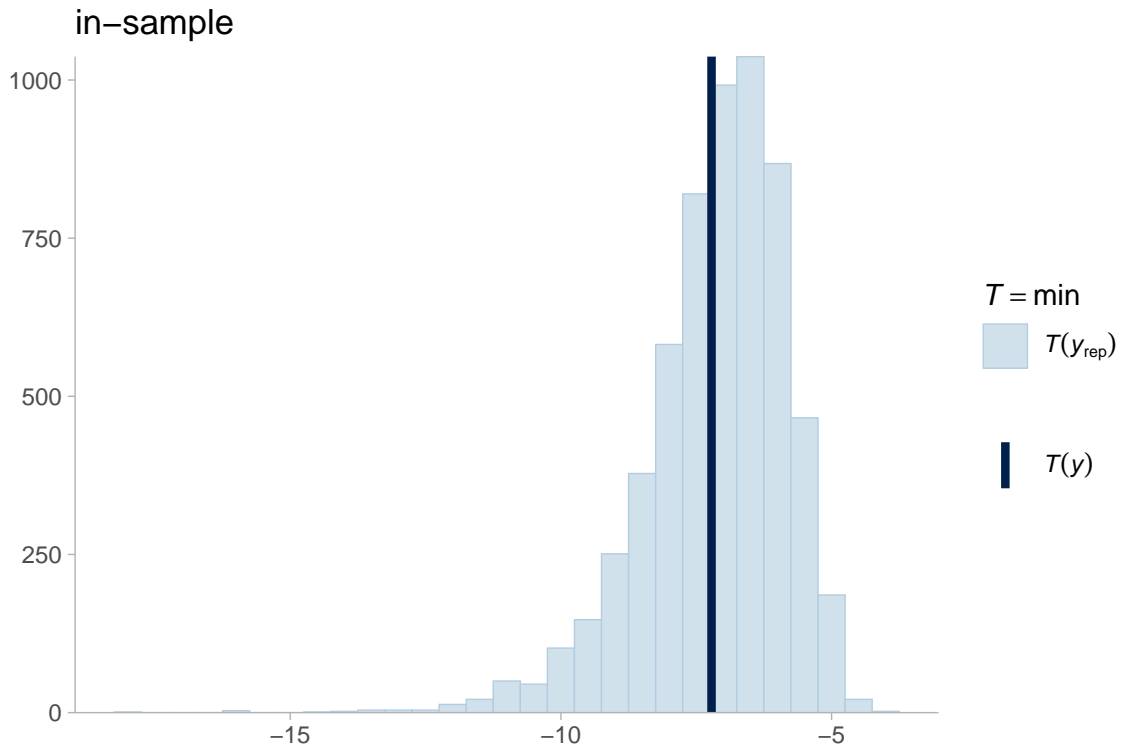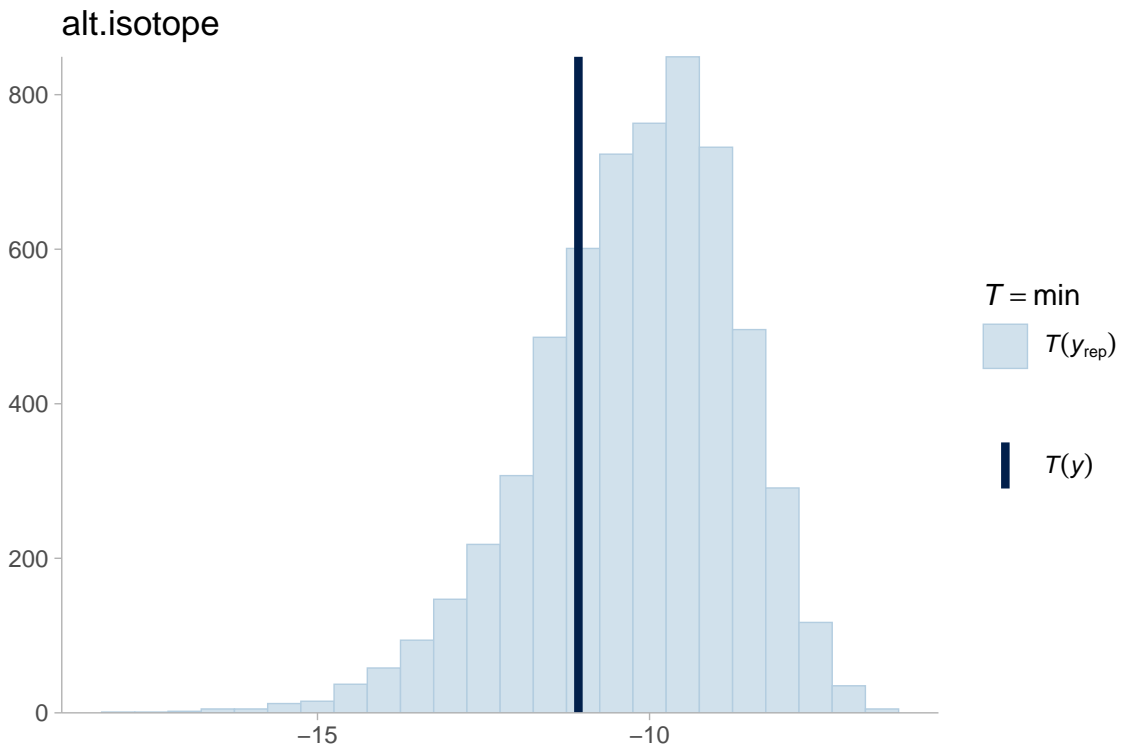

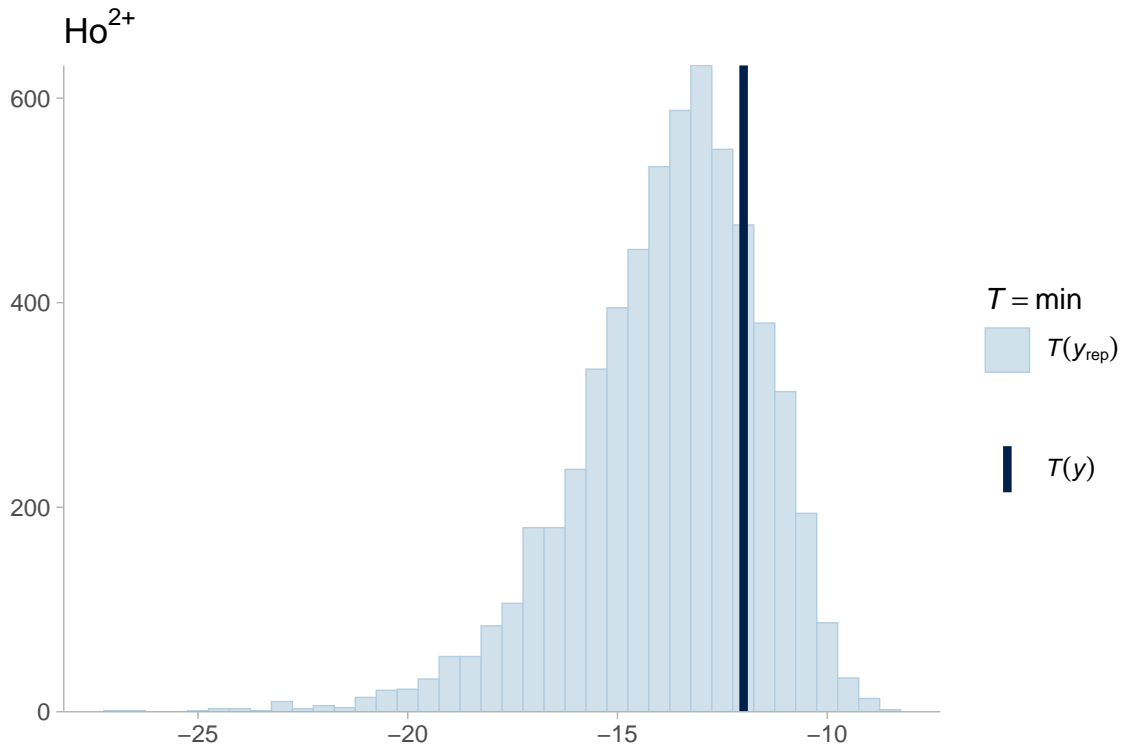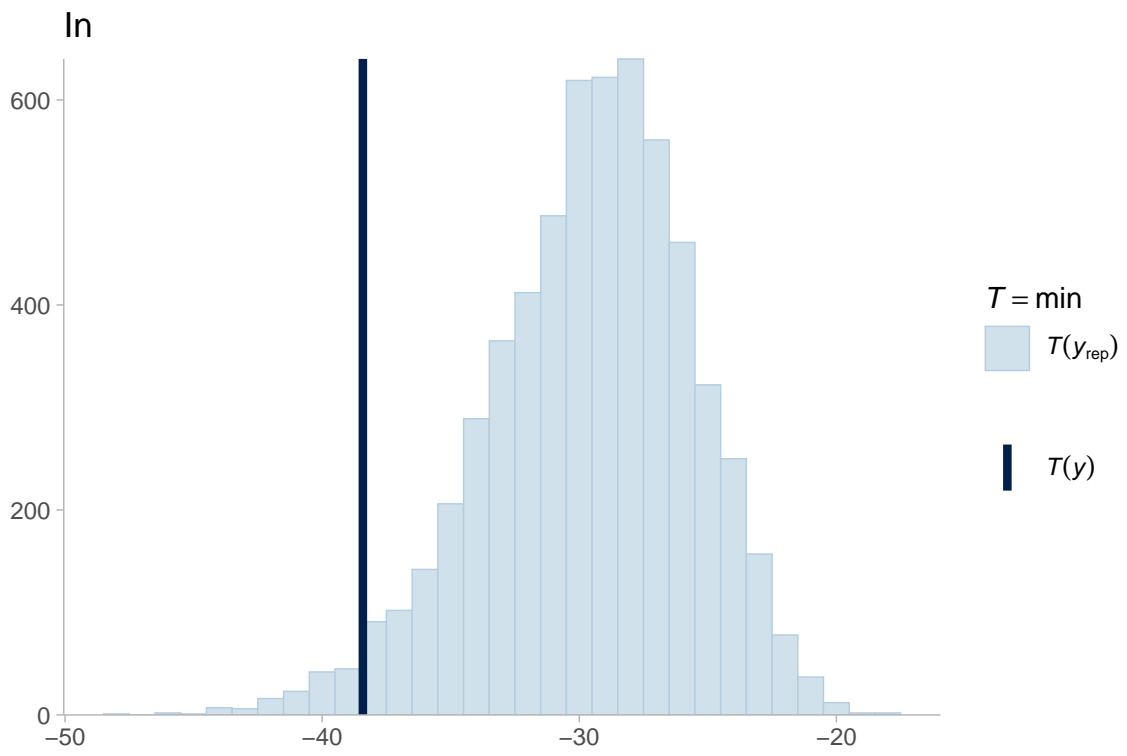



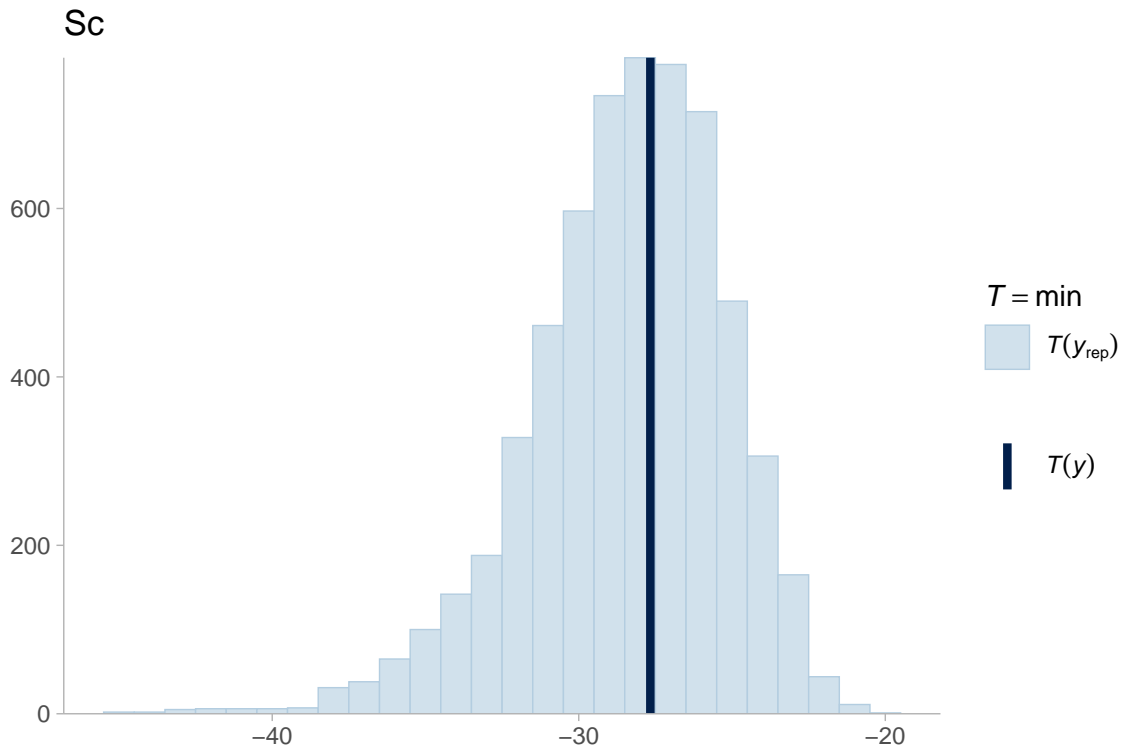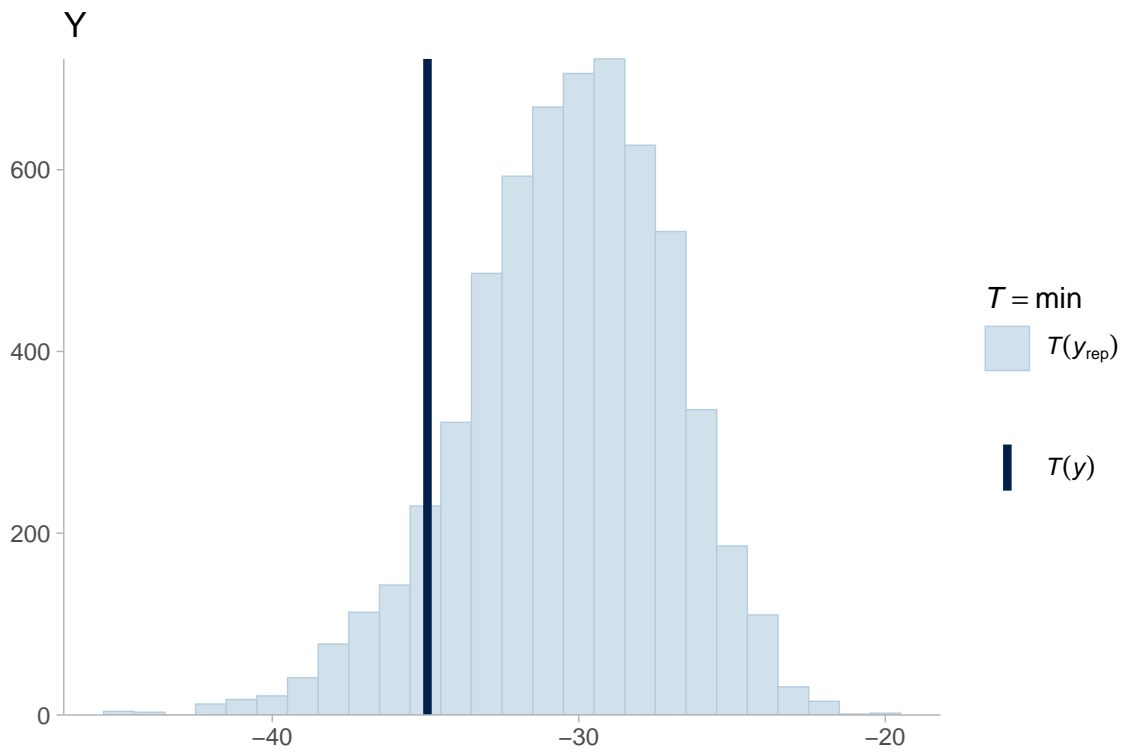

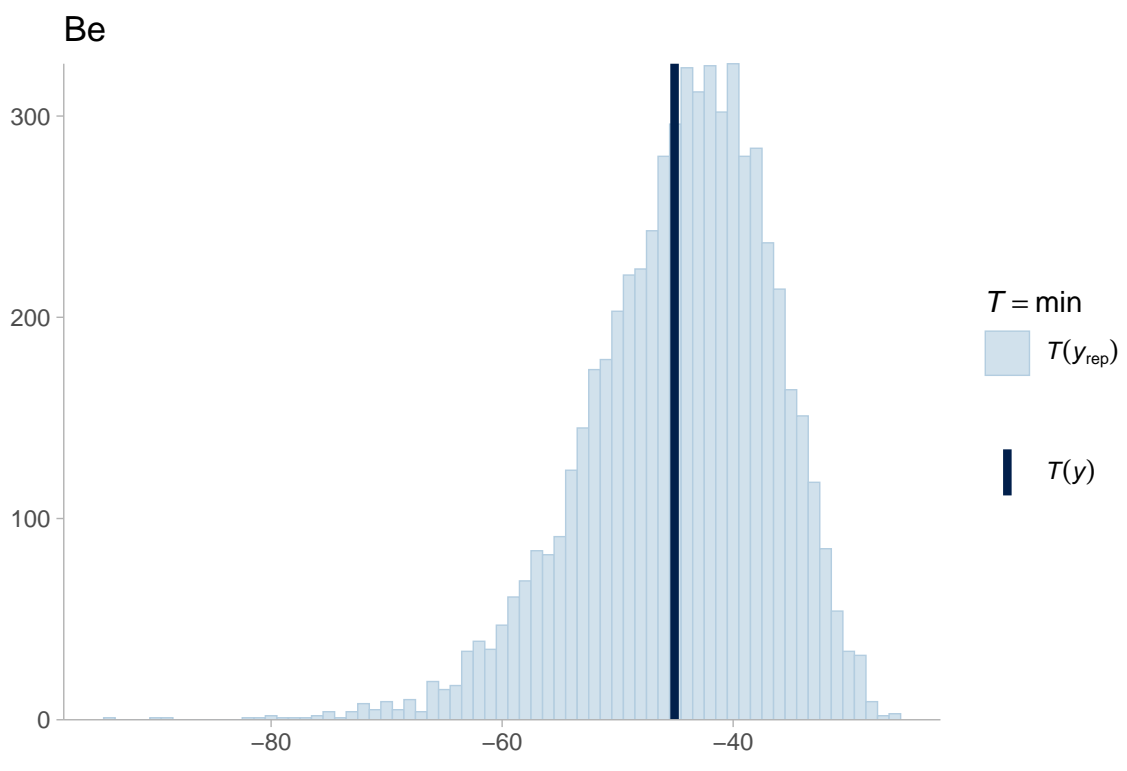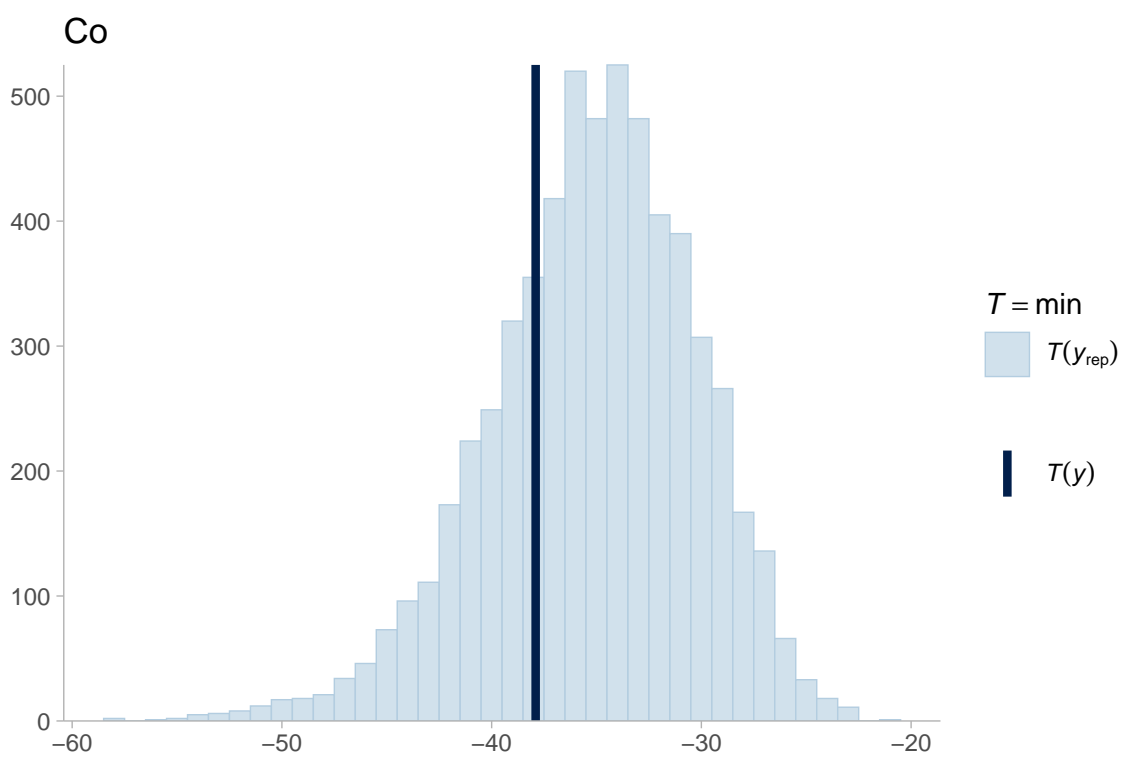

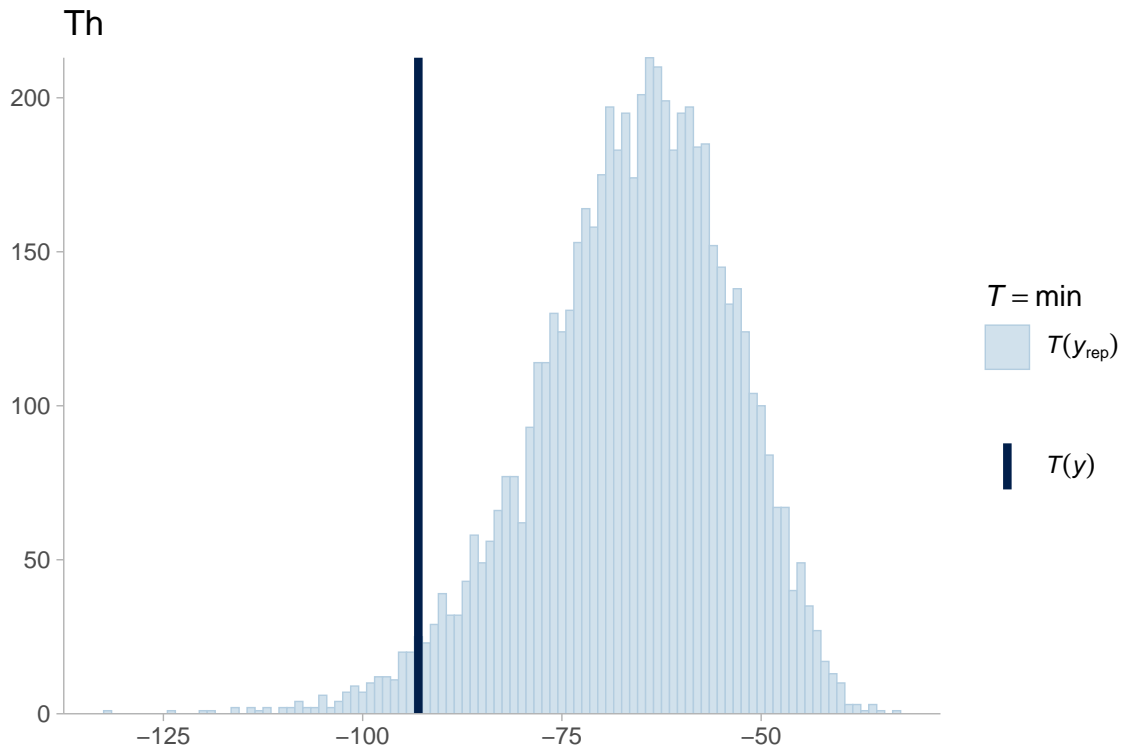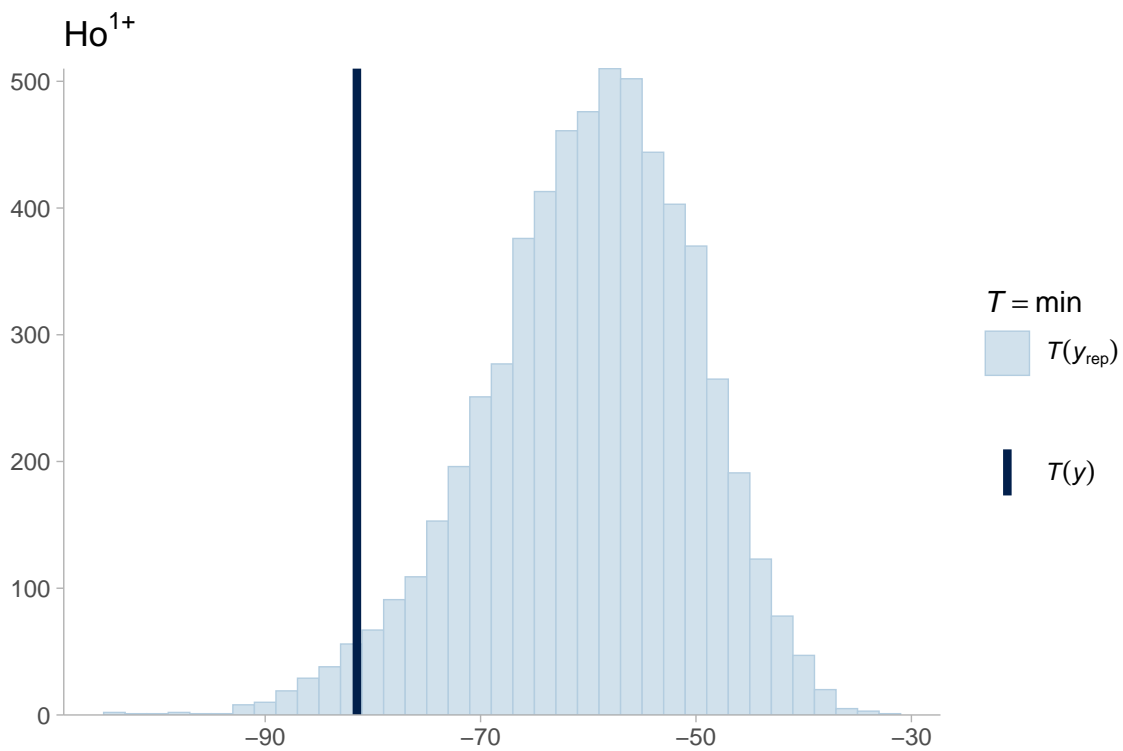

This check look good for most of the methods, but the checks for  $In$ ,  $Y$ ,  $Th$ , and  $Ho^{+1}$  may suggest that the model is consistently generating a lighter left tail compared to the observed data.

## Max

Next is a check comparing replicated maxs to the observed maxs.

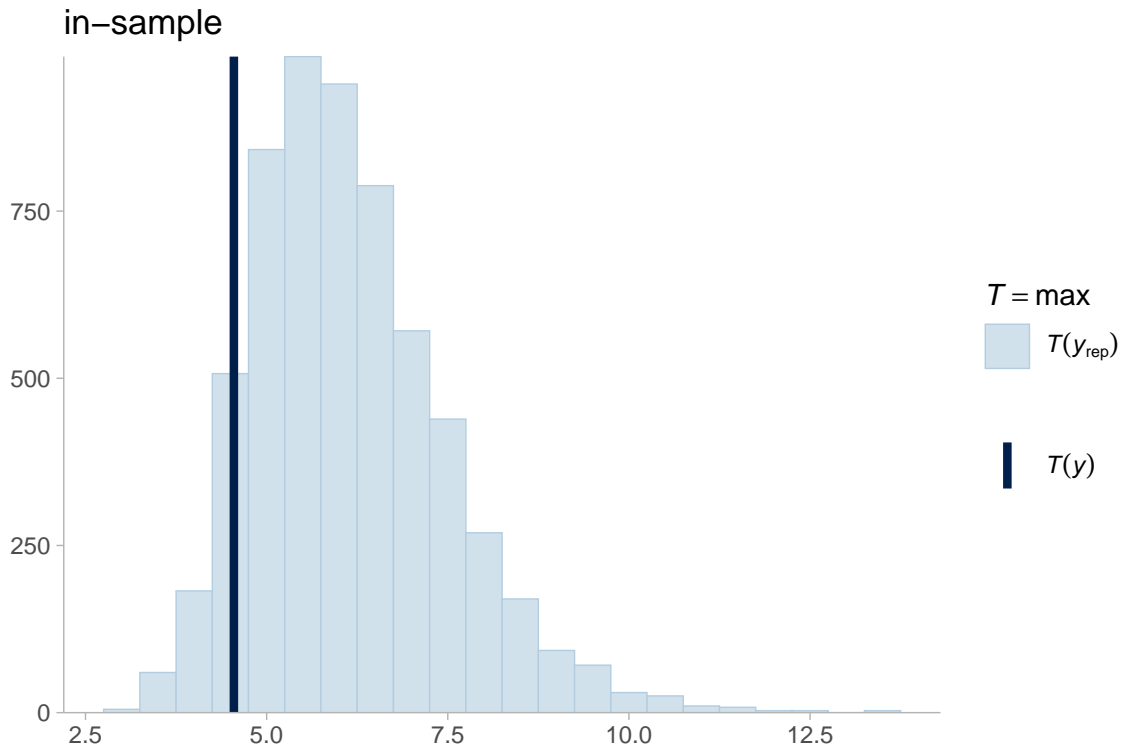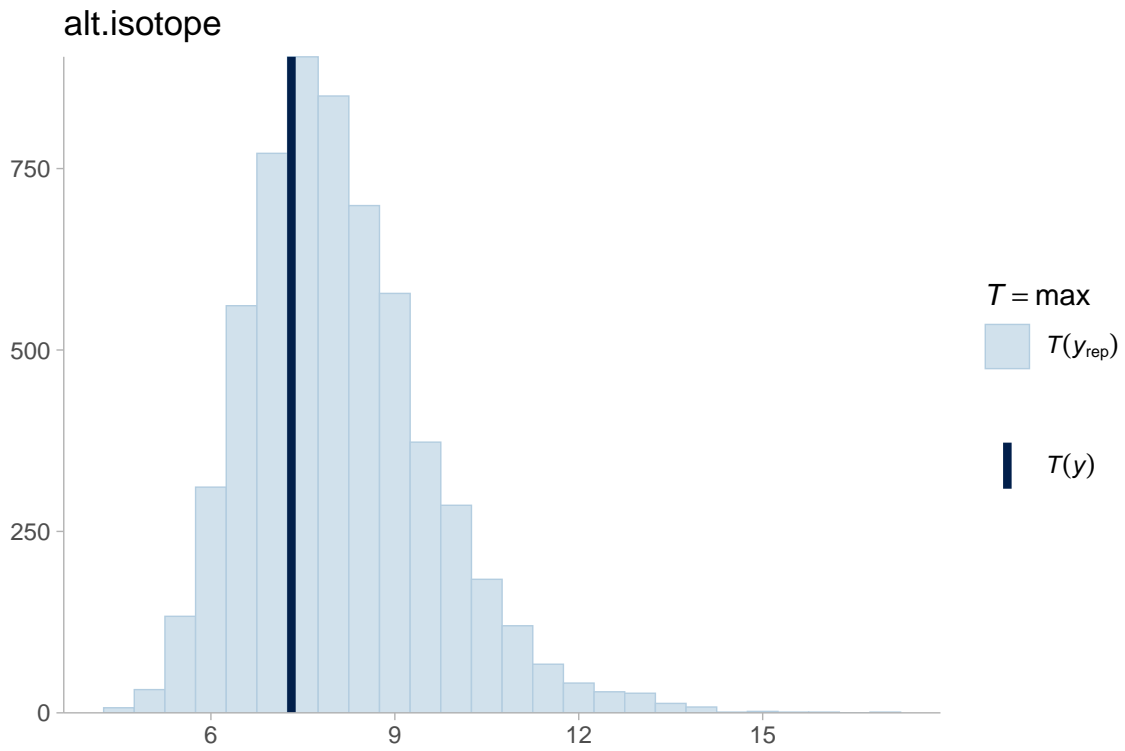

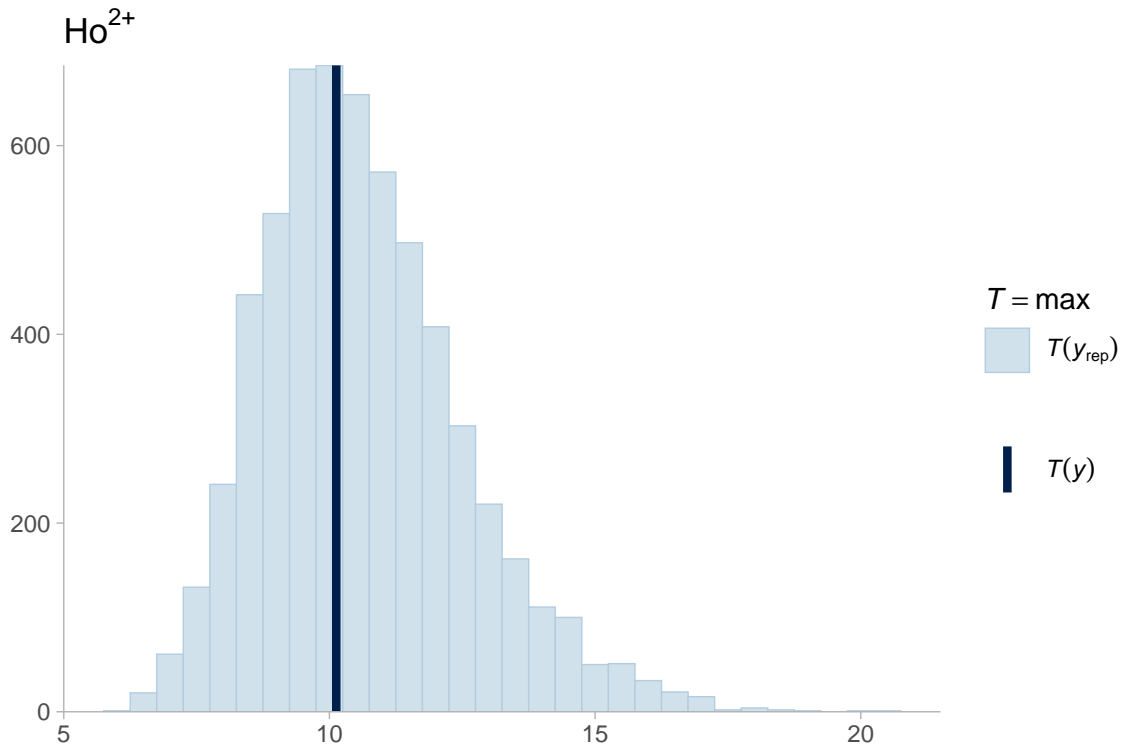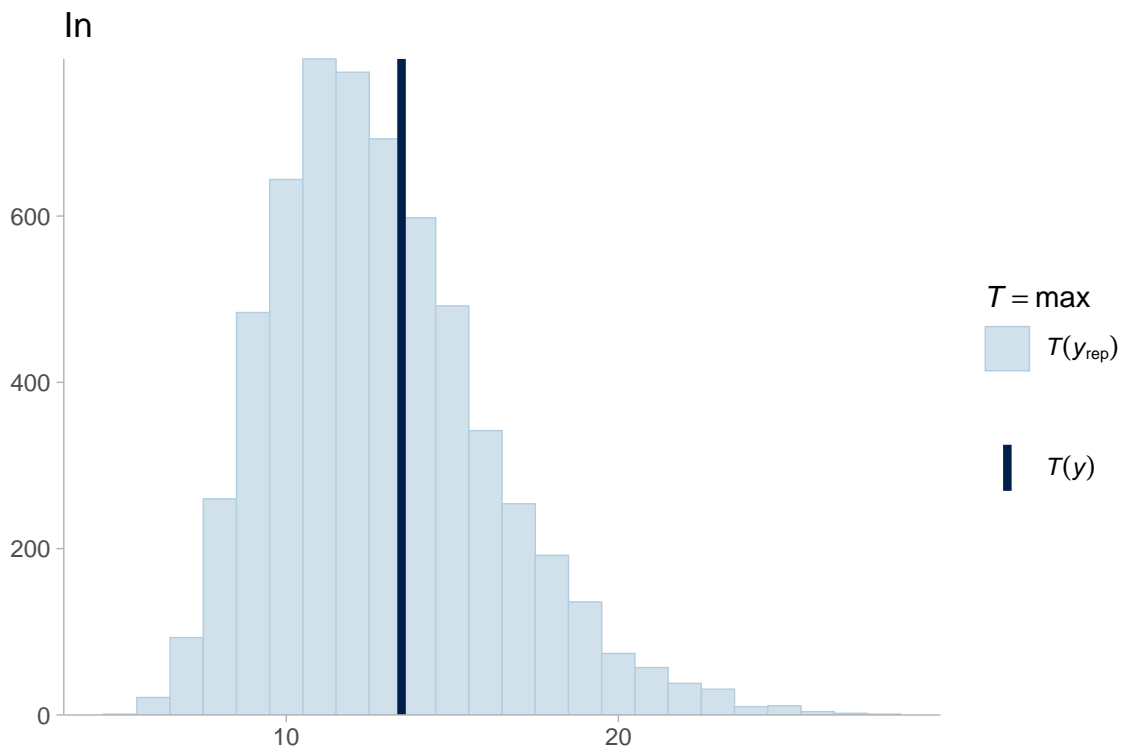

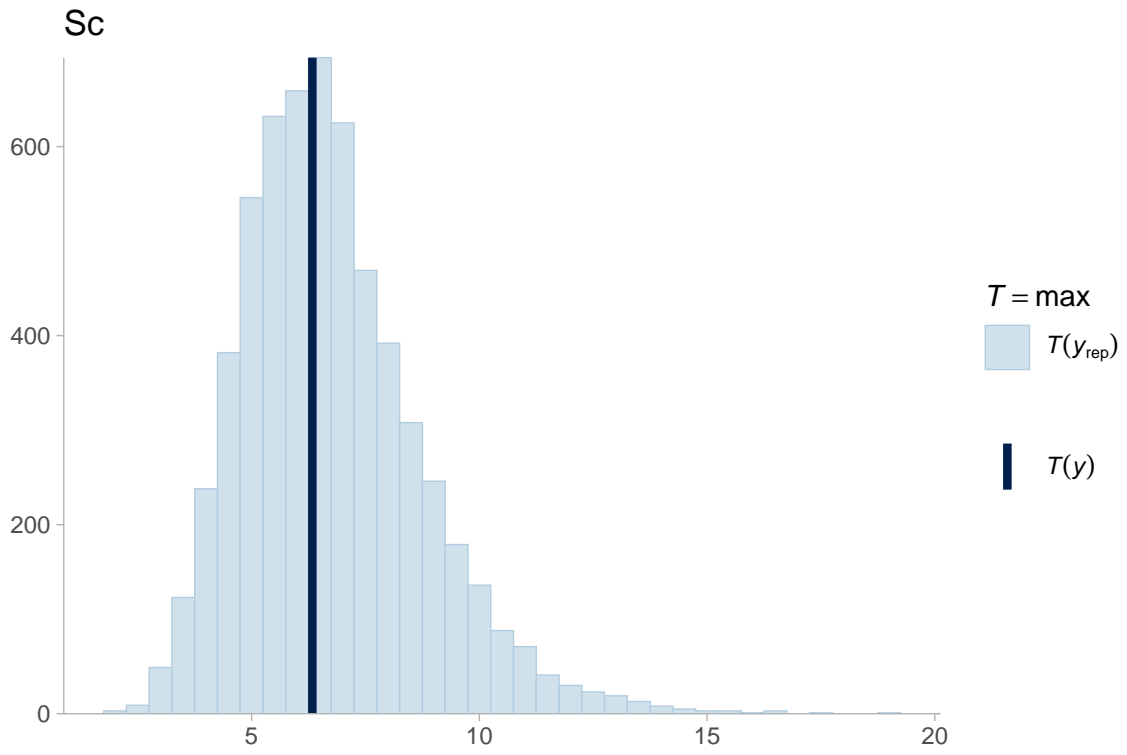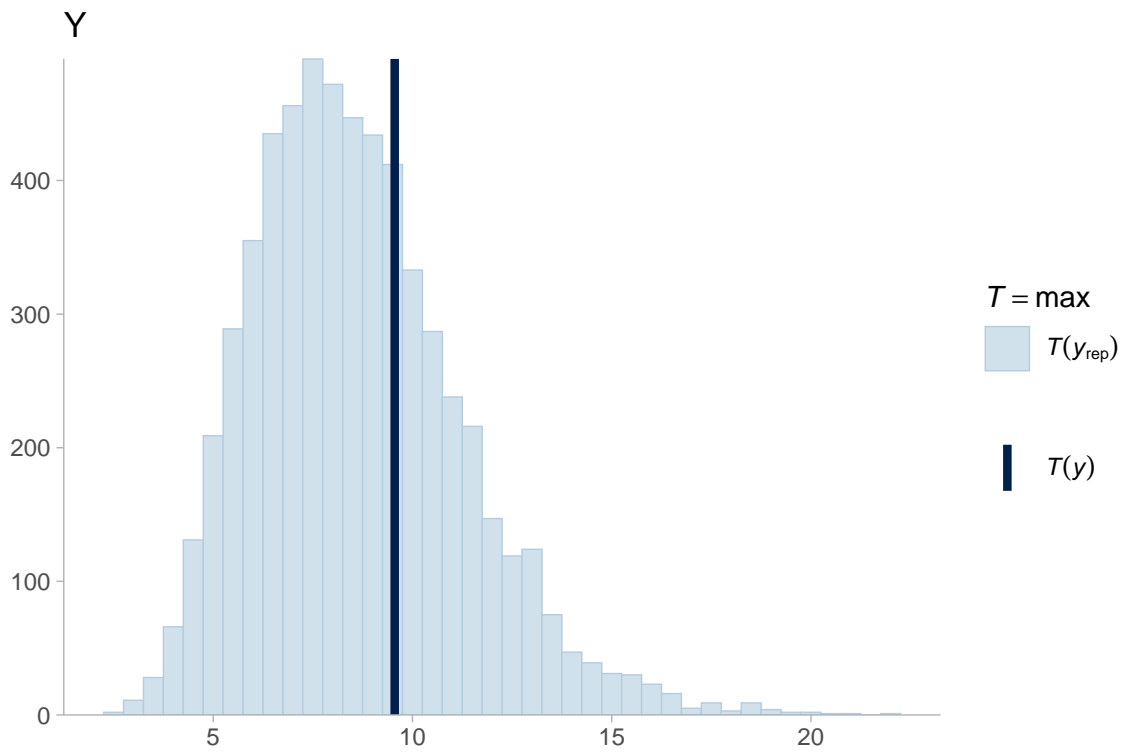

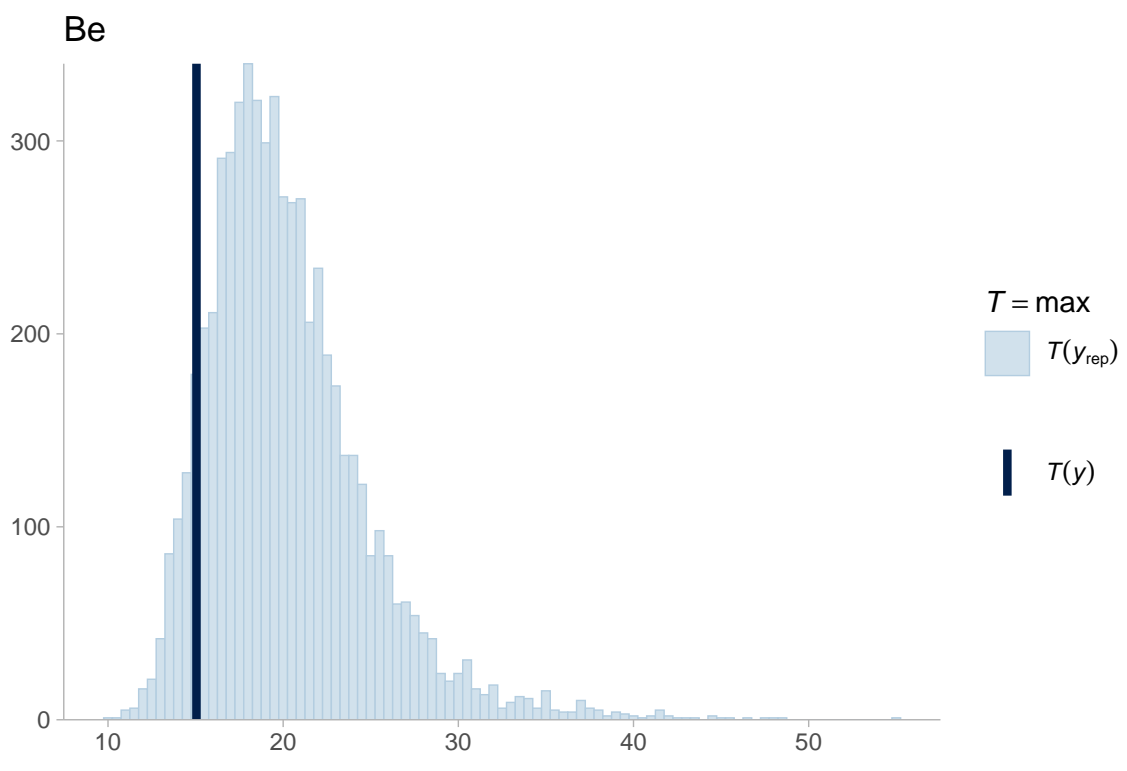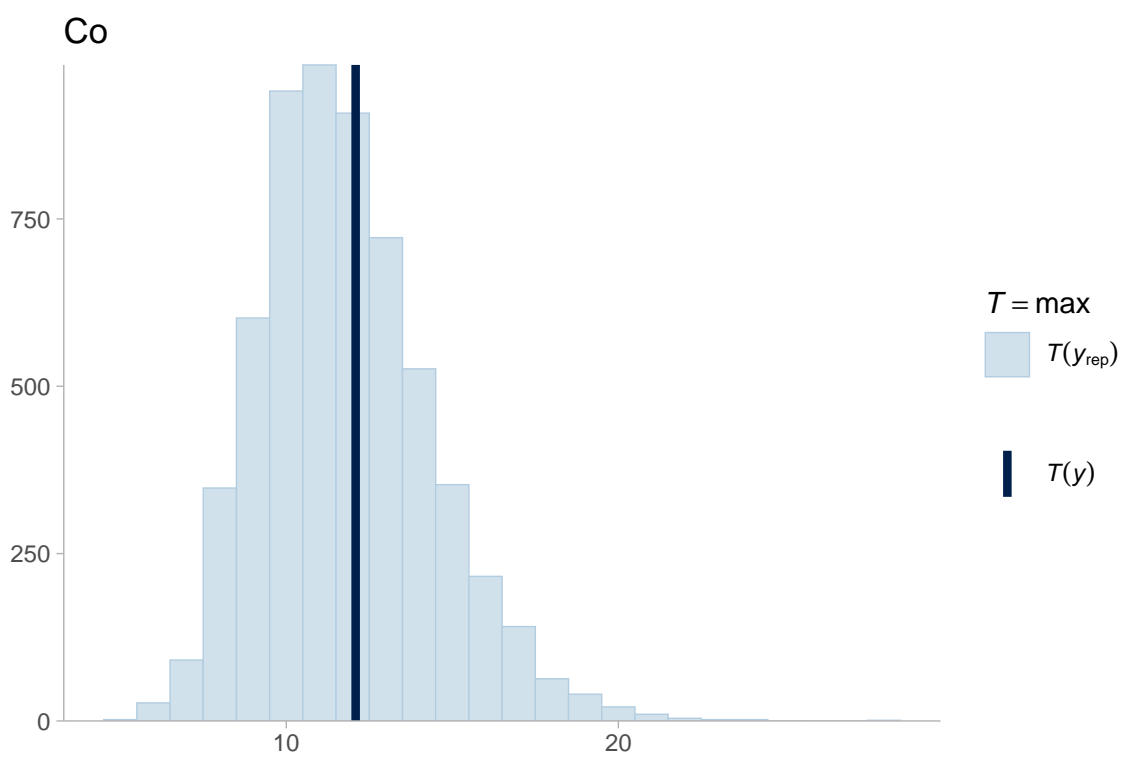

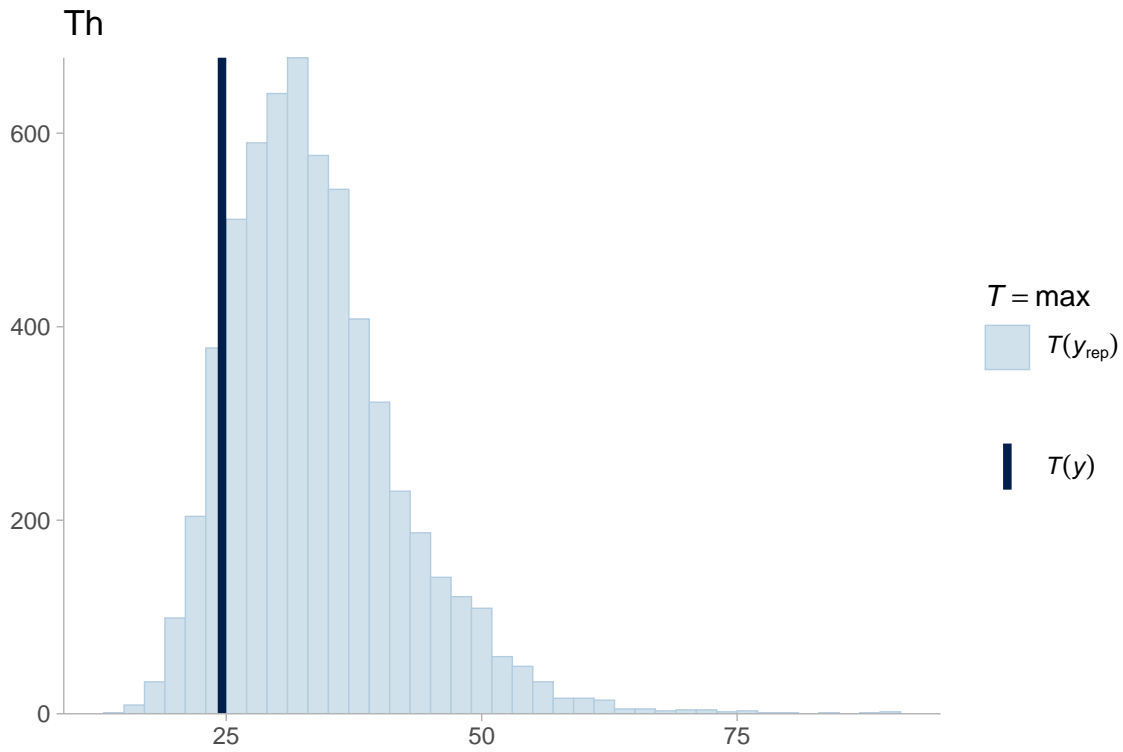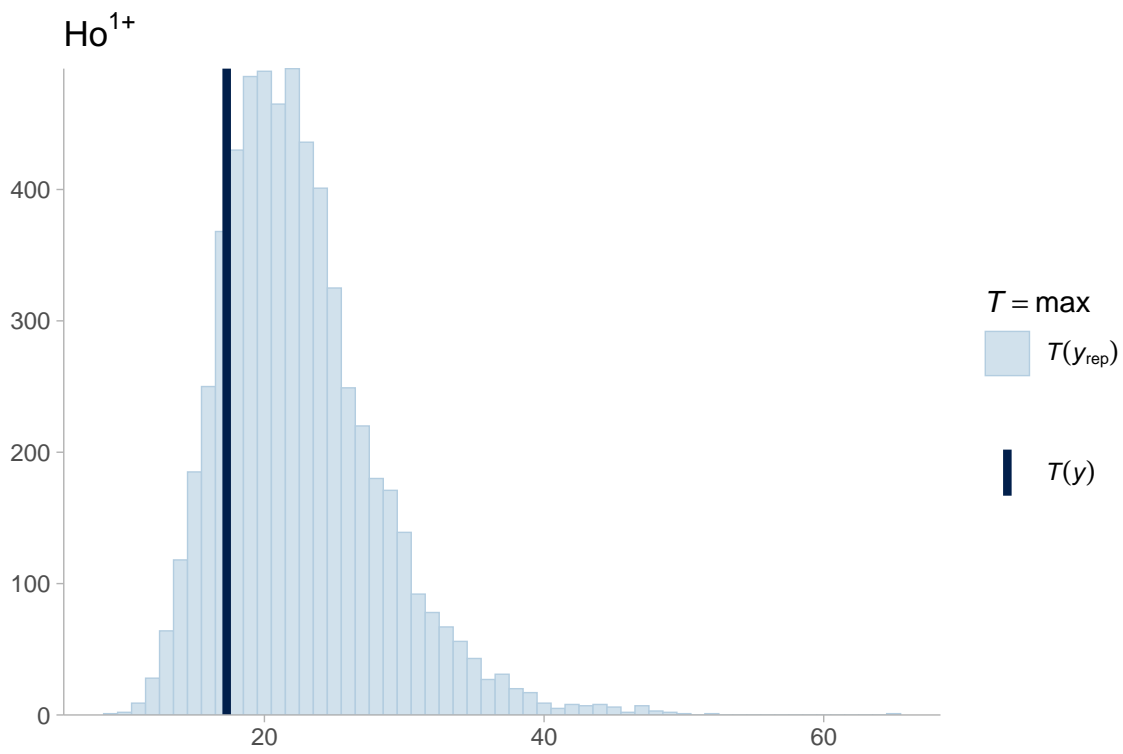

This check looks pretty reasonable with regard to the model's ability to replicate the max for all methods.



## Posterior inferences

Next, the posterior inferences from the selenium model.

### Conditional means

The conditional means estimated for the selenium portion of the experiment are below.

$\mu$  First, the estimated conditional means for the  $\mu$  component of the model.

**Tune** Estimate means conditional on method and tune while marginalizing over matrix and day.

```
load("full-analysis-files/df_mv_se.rda")
load("full-analysis-files/mod3_Se_mv.rda")
fitted_method_tune_se <- df_mv_se %>%
  add_fitted_draws(mod3,
    dpar = FALSE,
    re_formula = NA,
    cores = 1)
save(fitted_method_tune_se, file = "full-analysis-files/fitted_method_tune_se.rda")
```

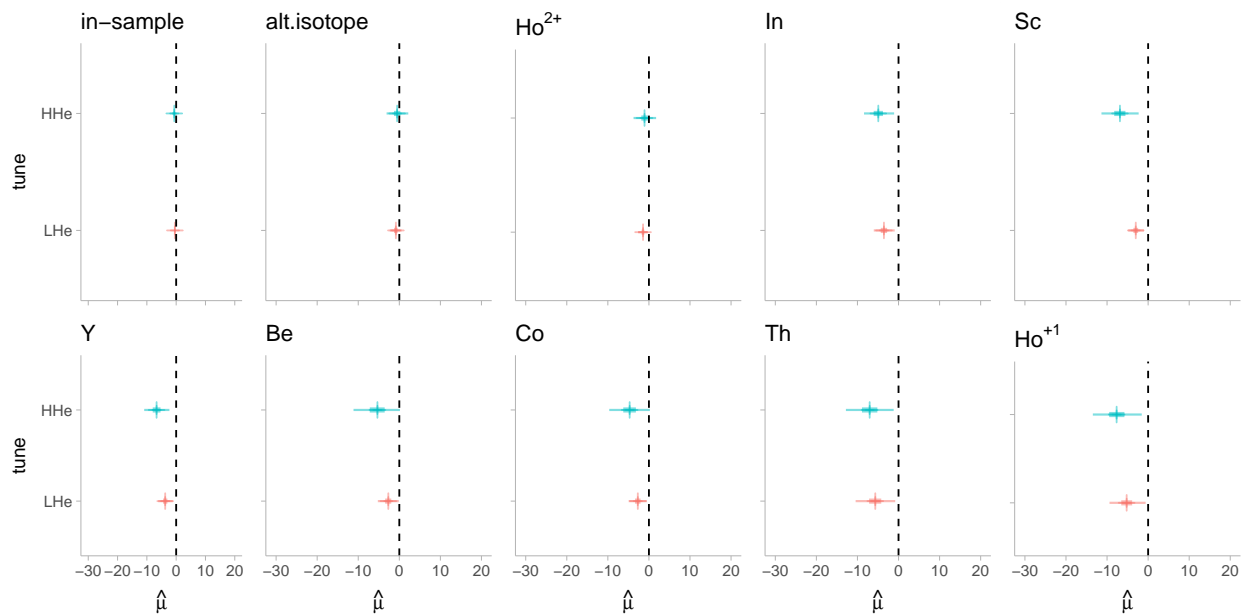

**Day** Estimate means conditional on method and day after marginalizing over matrix.

```
load("full-analysis-files/df_mv_se.rda")
load("full-analysis-files/mod3_Se_mv.rda")
fitted_method_day_se <- df_mv_se %>%
  add_fitted_draws(mod3,
    dpar = FALSE,
    re_formula = ~ (1 | day_expt),
```

```
cores = 1)
save(fitted_method_day_se, file = "full-analysis-files/fitted_method_day_se.rda")
```

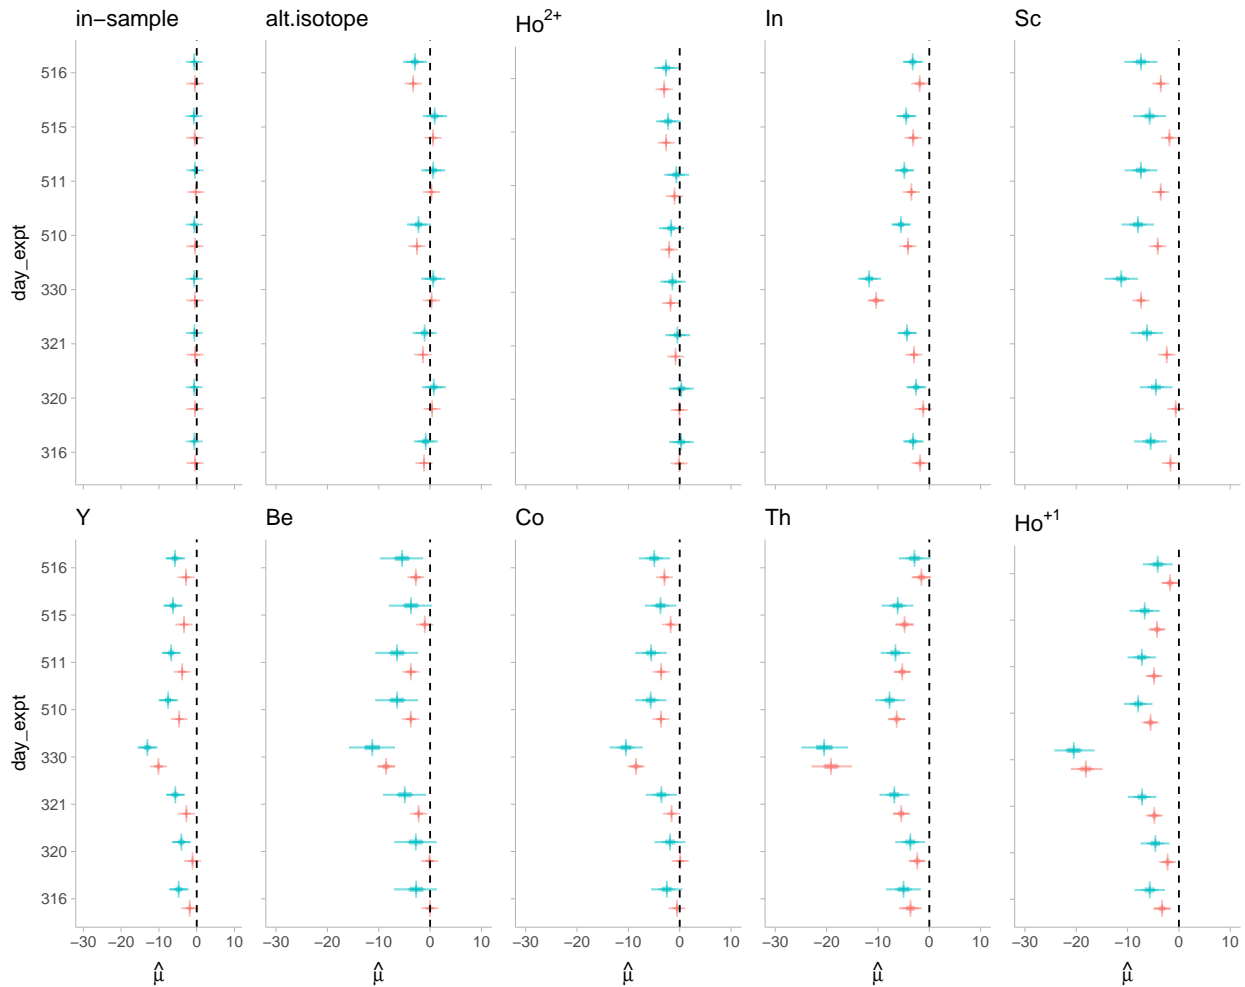

This figure illustrates the consistent over-corrections (i.e., negative bias) expected for all of the +1 methods across all days for both tune settings, with some exceptions here and there (e.g., *Sc*, HHe, 3/20). For those methods, 3/30 also stands out with even more extreme over-corrections. By comparison, the means for the +2 methods are relatively consistent across the days of the experiment, particularly for the in-sample method. Also note that, relative to the arsenic estimates, the +2 methods tend to have fewer estimated under-corrections (i.e., positive bias) estimated across days, and the alternative isotope and  $Ho^{+2}$  methods actually are estimated to have more over-corrections. Again, the in-sample method is generally estimated to be unbiased on all days for both tune settings.

The tune effects, overall, look negligible within days for all of the +2 methods. There may be some differences due to tune setting for the +1 methods, but those differences would be fairly hard to ascertain with much certainty.

**Matrix** Estimate means conditional on method and matrix after marginalizing over day.

```

load("full-analysis-files/df_mv_se.rda")
load("full-analysis-files/mod3_Se_mv.rda")

fitted_method_matrix_se <- df_mv_se %>%
  add_fitted_draws(mod3,
    dpar = FALSE,
    re_formula = ~ (1 | matrix),
    cores = 1)
save(fitted_method_matrix_se, file = "full-analysis-files/fitted_method_matrix_se.rda")

```

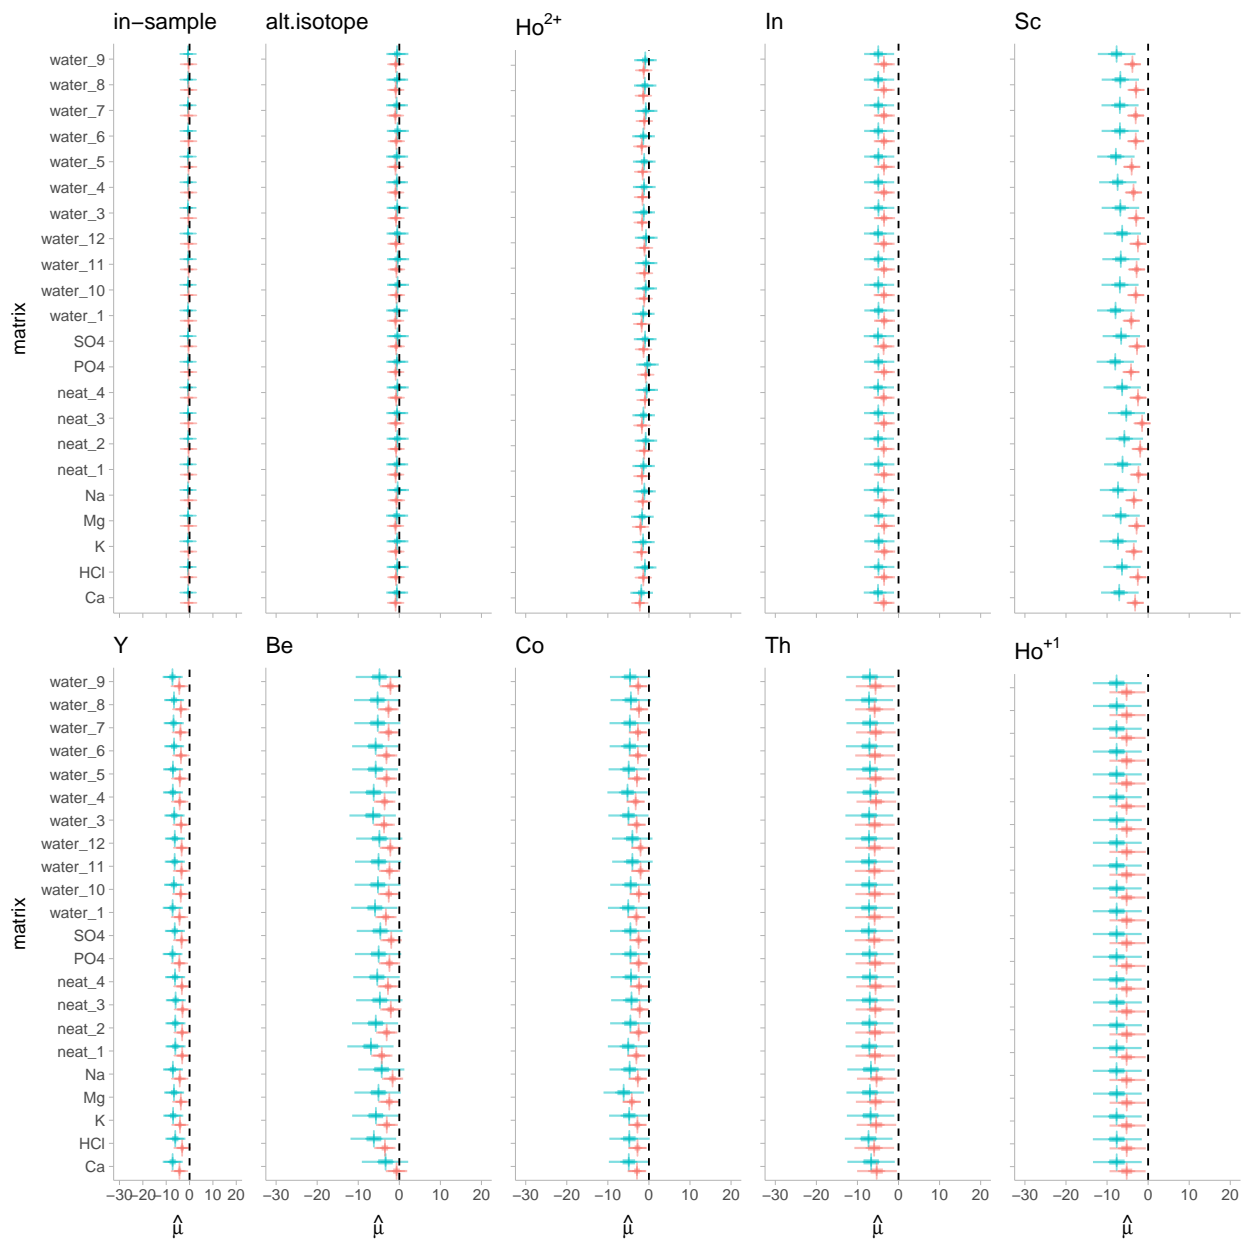

The estimates vary little by matrix for all of the methods. Again, the general pattern of over-correction for the +1 methods and minimal bias for the +2 methods is clear. Again, the tune effects look to be uncertain

to minimal.

$\sigma$  Next, the conditional means for the  $\sigma$  component of the model.

```
load("full-analysis-files/df_mv_se.rda")
load("full-analysis-files/mod3_Se_mv.rda")

fitted_sigma_tune_se <- df_mv_se %>%
  add_fitted_draws(mod3,
    dpar = "sigma",
    re_formula = NA,
    cores = 1)
save(fitted_sigma_tune_se, file = "full-analysis-files/fitted_sigma_tune_se.rda")
```

**Tune** The expected standard deviations by day after marginalizing over matrix are below.

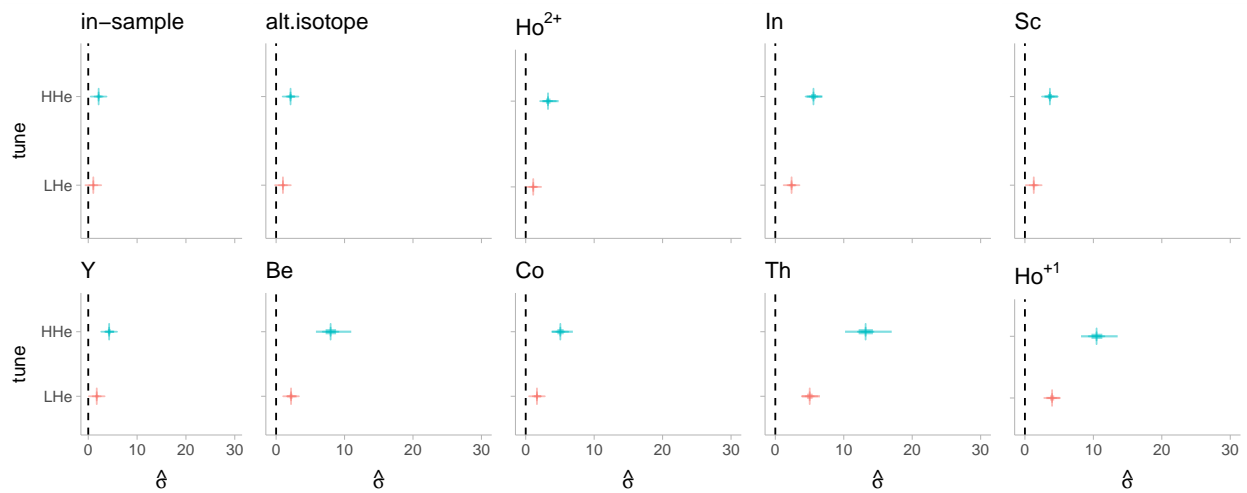

```
load("full-analysis-files/df_mv_se.rda")
load("full-analysis-files/mod3_Se_mv.rda")

fitted_sigma_day_se <- df_mv_se %>%
  add_fitted_draws(mod3,
    dpar = "sigma",
    re_formula = sigma ~ (1 | day_expt),
    cores = 1)
save(fitted_sigma_day_se, file = "full-analysis-files/fitted_sigma_day_se.rda")
```

**Day** The expected standard deviations by day after marginalizing over matrix are below.

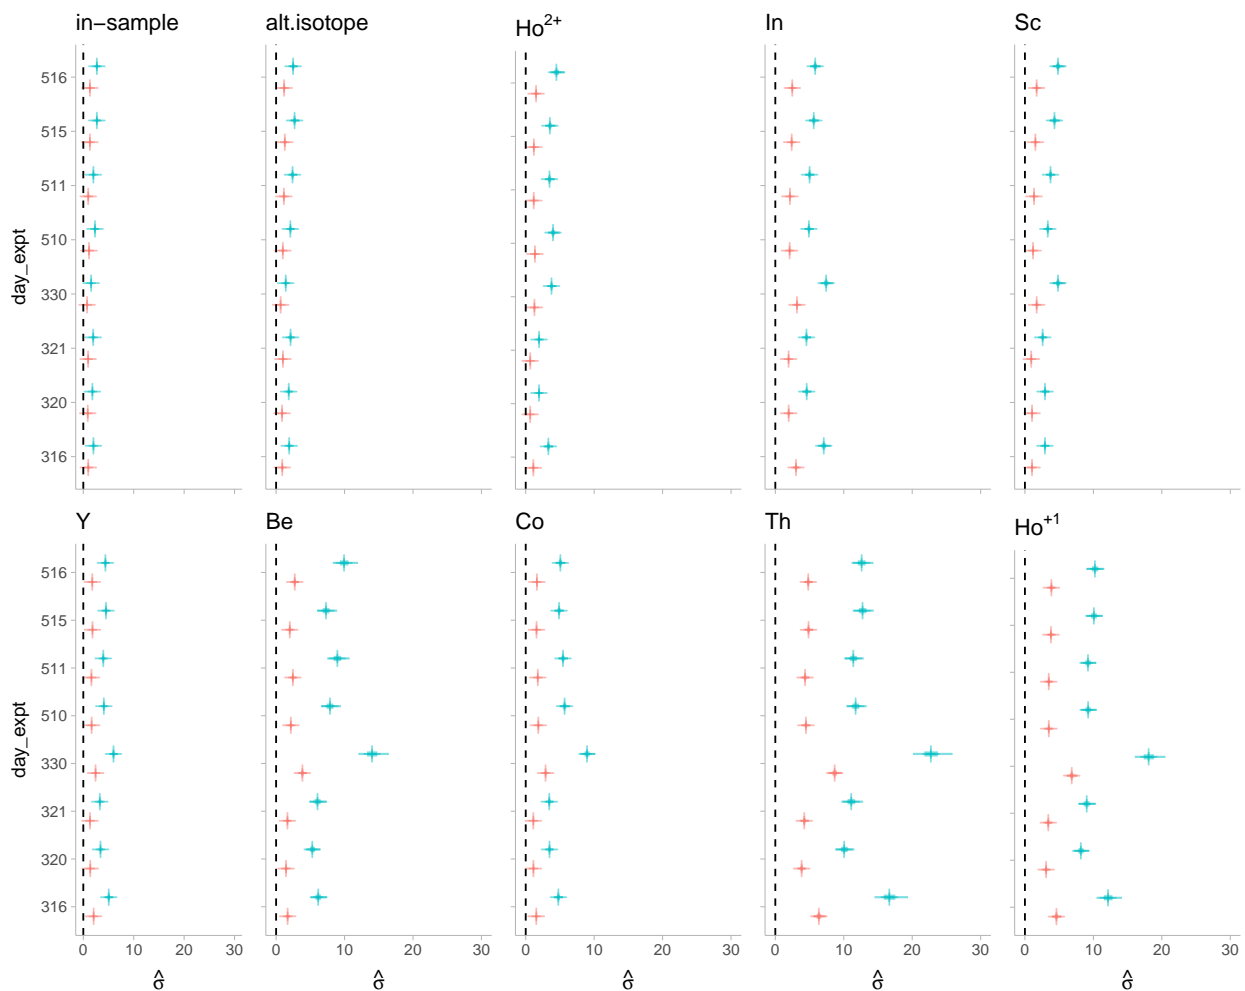

Standard deviation is estimated to vary considerably from day to day for some of the +1 methods. Much of that variability, however, is attributed to the large deviation on 3/30. Interestingly, and in contrast to the arsenic data, that 3/30 effect isn't indicated for *In*, *Sc* and *Y*. Standard deviation didn't clearly vary by day for the +2 methods either. This figure does suggest some clear differences in standard deviation due to tune setting, particularly for the +1 methods; and possibly for the  $Ho^{2+}$  method.

```
load("full-analysis-files/df_mv_se.rda")
load("full-analysis-files/mod3_Se_mv.rda")

fitted_sigma_matrix_se <- df_mv_se %>%
  add_fitted_draws(mod3,
    dpar = "sigma",
    re_formula = sigma ~ (1 | matrix),
    cores = 1)
save(fitted_sigma_matrix_se, file = "full-analysis-files/fitted_sigma_matrix_se.rda")
```

**Matrix** The expected standard deviations by matrix while marginalizing over day.

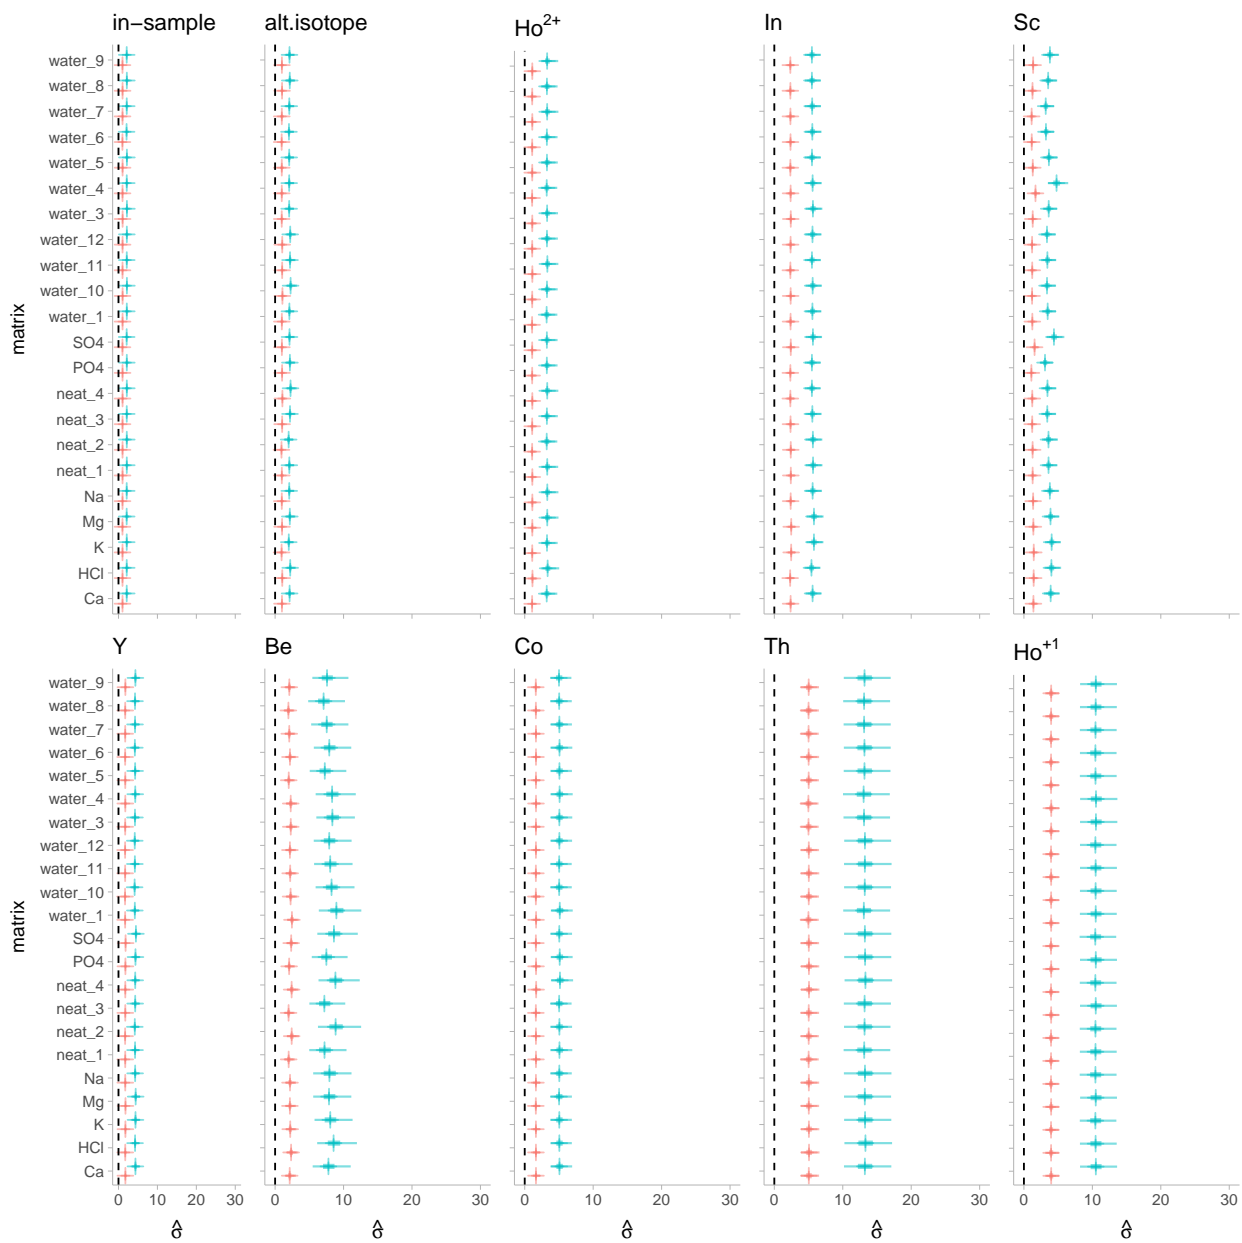

Overall, excepting perhaps the *Sc* and *Be* methods, matrix to matrix variability in standard deviation was estimated to be fairly negligible. The tune effects on standard deviation are clear in this figure, which depended on the method.

### Residual Correlations

Next, the estimated residual correlations among IS methods for the selenium model.

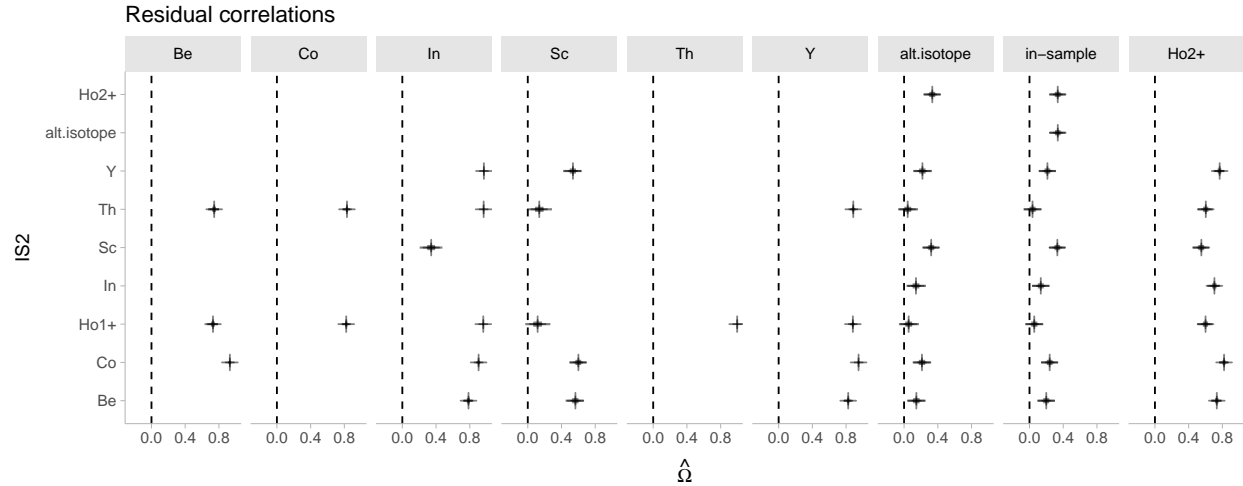

The patterns in the residual correlations are very similar to the patterns with arsenic above. The correlations are generally stronger between the +1 methods. However, it is notable that the correlations between the in-sample and alt.isotope methods and the others are considerably smaller for the selenium model compared to the one for arsenic, although the models are the same structurally.

## Predictions

Finally, the predictions for the selenium model.

**Day** Predictions to the observed days for a new matrix.

# Selenium

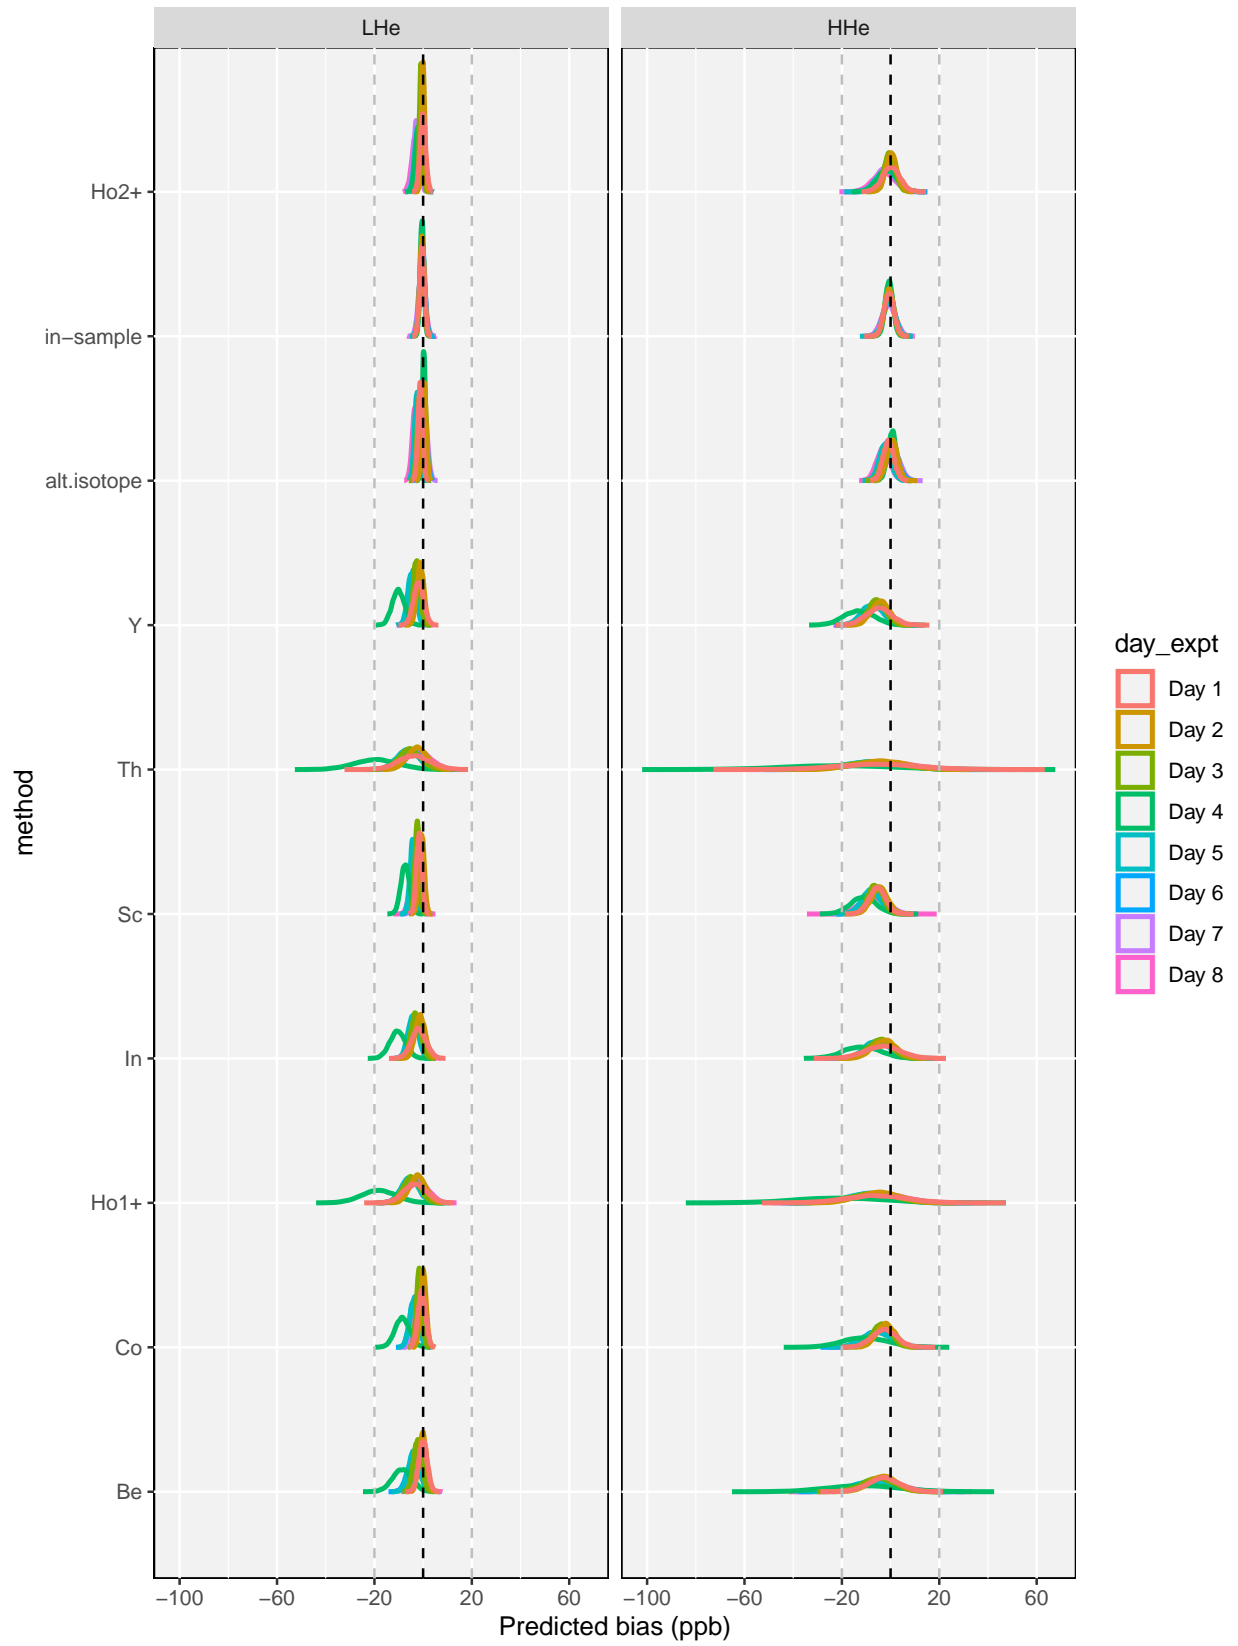



Clearly the in-sample method is predicted to have the least bias, on average, and the least variation across and within days. There is no indication of important day to day variability for that method. The alt.isotope and  $Ho^{+2}$  methods are also predicted to be reasonably unbiased and consistent, but some day to day variation in bias is apparent, if small. Across all of the +2 methods, bias was predicted with far greater precision for LHe tune compared to the HHe tune.

**Matrix** The predictions to the observed matrices while marginalizing the day effects are below.

# Selenium

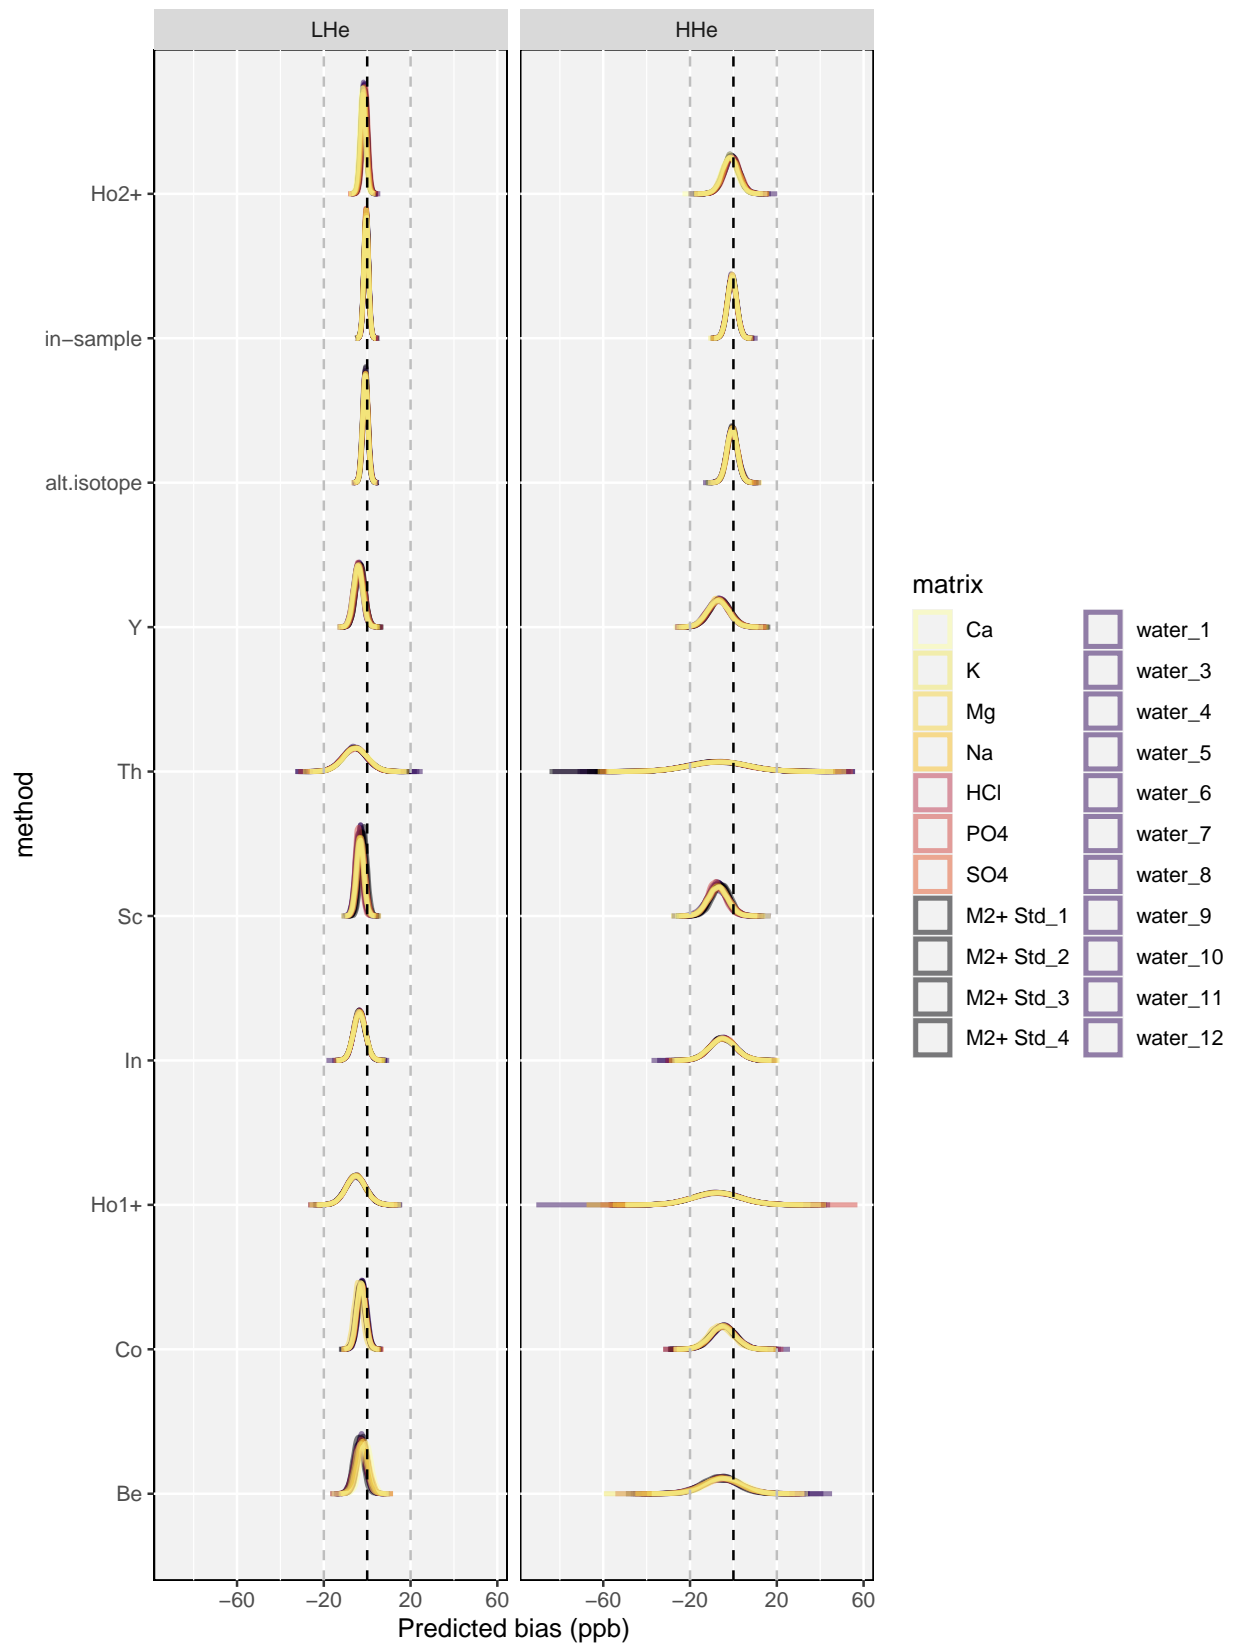

Matrix to matrix variability is predicted to be largely negligible for most methods. This is a bit of a contrast to the arsenic predictions, which suggested a more variation across matrices, particularly in the 250ppm matrices vs. others.

**New day and matrix** Finally, the predictions to a new matrix and new day from the selenium model.

The probability of over-correction for each case can be calculated from the posterior predictive distribution.

```
## # A tibble: 20 x 4
## # Groups:   .category [10]
##   .category method      tune p_over
##   <fct>      <fct>      <fct> <dbl>
## 1 Std        in-sample  LHe    0.66
## 2 Std        in-sample  HHe    0.62
## 3 Alt        alt.isotope LHe    0.76
## 4 Alt        alt.isotope HHe    0.58
## 5 Ho2        Ho2+       LHe    0.87
## 6 Ho2        Ho2+       HHe    0.62
## 7 In         In          LHe    0.91
## 8 In         In          HHe    0.8
## 9 Sc         Sc          LHe    0.97
## 10 Sc        Sc          HHe    0.95
## 11 Y         Y           LHe    0.96
## 12 Y         Y           HHe    0.92
## 13 Be        Be          LHe    0.86
## 14 Be        Be          HHe    0.74
## 15 Co        Co          LHe    0.91
## 16 Co        Co          HHe    0.8
## 17 Th        Th          LHe    0.85
## 18 Th        Th          HHe    0.7
## 19 Ho1       Ho1+       LHe    0.87
## 20 Ho1       Ho1+       HHe    0.76
```

# Selenium

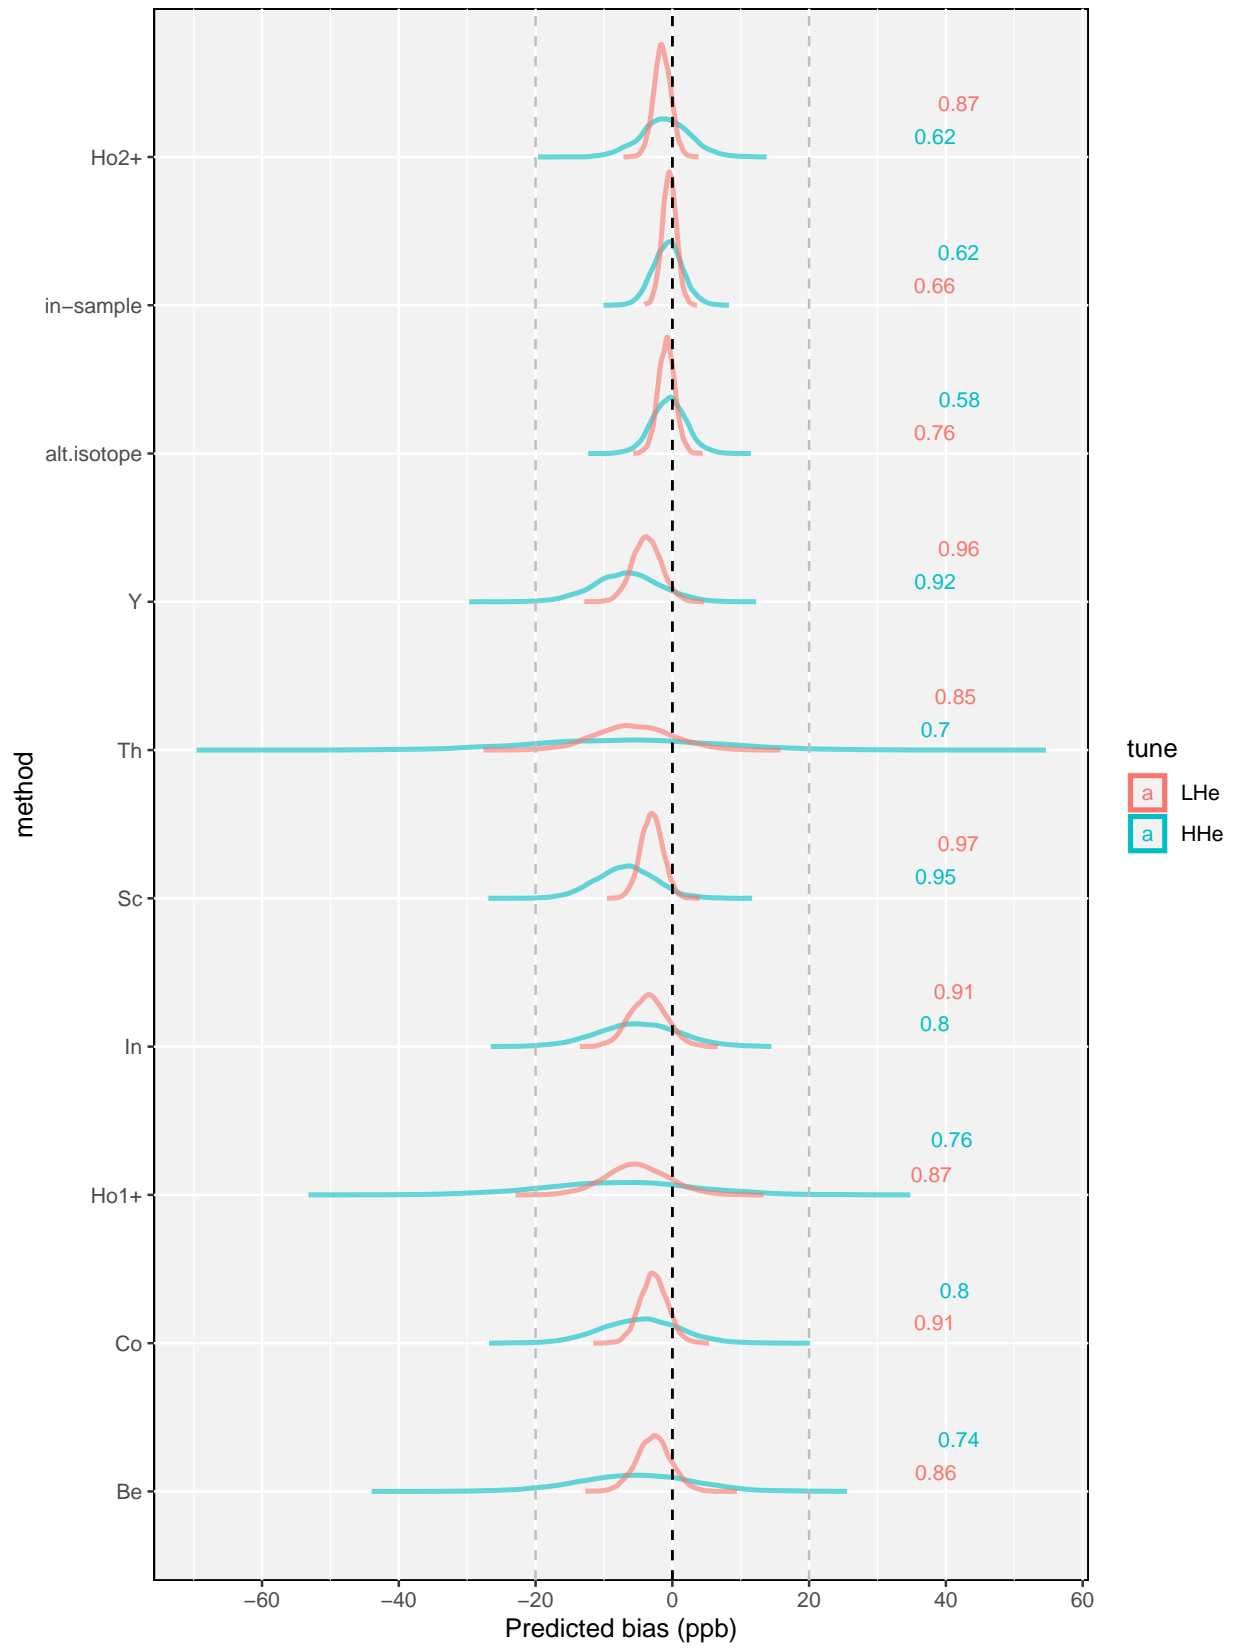

This figure again emphasizes differences in precision between the predictions for the +2 and +1 methods as well as the two tune settings. Compared to the model for arsenic, this one for selenium allocates more probability towards over-corrections for the +2 internal standard methods; whereas for the arsenic model, all +2 methods were predicted with most of the probability in the region of under-correction. The predictions for the +1 methods are largely in the direction of over-correction.

Overall, the in-sample method predictions compare favorably compared to most other methods and tune settings. The expected bias is nearer zero and the uncertainty in the predictions are considerably smaller, even for the HHe tune setting.

## References

- Bürkner, Paul-Christian. 2017. “Brms: An R Package for Bayesian Multilevel Models Using Stan.” *Journal Article*. 2017 80 (1): 28. <https://doi.org/10.18637/jss.v080.i01>.
- Gabry, Jonah, Daniel Simpson, Aki Vehtari, Michael Betancourt, and Andrew Gelman. 2019. “Visualization in Bayesian Workflow.” *Journal Article*. *Journal of the Royal Statistical Society: Series A (Statistics in Society)* 182 (2): 389–402. <https://doi.org/10.1111/rssa.12378>.
- Stan Development Team. 2018a. “RStan: The R Interface to Stan.” *Journal Article*. <http://mc-stan.org>.
- . 2018b. “Stan Modeling Language Users Guide and Reference Manual, Version 2.18.0.” *Journal Article*. <http://mc-stan.org>.
- . 2018c. “The Stan Core Library, Version 2.18.0.” *Journal Article*. <http://mc-stan.org>.
- Vehtari, Aki, Andrew Gelman, and Jonah Gabry. 2017. “Practical Bayesian Model Evaluation Using Leave-One-Out Cross-Validation and Waic.” *Journal Article*. *Statistics and Computing* 27 (5): 1413–32. <https://doi.org/10.1007/s11222-016-9696-4>.

## Session Info

```
sessionInfo()
```

```
## R version 4.0.5 (2021-03-31)
## Platform: x86_64-w64-mingw32/x64 (64-bit)
## Running under: Windows 10 x64 (build 18363)
##
## Matrix products: default
##
## locale:
## [1] LC_COLLATE=English_United States.1252
## [2] LC_CTYPE=English_United States.1252
## [3] LC_MONETARY=English_United States.1252
## [4] LC_NUMERIC=C
## [5] LC_TIME=English_United States.1252
##
## attached base packages:
## [1] stats      graphics  grDevices  utils      datasets  methods   base
##
## other attached packages:
## [1] brms_2.16.1      Rcpp_1.0.7      ggrepel_0.9.1
```

```

## [4] ggdist_3.0.0          tidybayes_3.0.1      bayesplot_1.8.1
## [7] loo_2.4.1             rstan_2.21.2        StanHeaders_2.21.0-7
## [10] forcats_0.5.1        stringr_1.4.0       dplyr_1.0.7
## [13] purrr_0.3.4          readr_2.1.0         tidyr_1.1.4
## [16] tibble_3.1.6         tidyverse_1.3.1     readxl_1.3.1
## [19] gridExtra_2.3        ggExtra_0.9         ggplot2_3.3.5
##
## loaded via a namespace (and not attached):
## [1] minqa_1.2.4          colorspace_2.0-2     ellipsis_0.3.2
## [4] gggridges_0.5.3      rsconnect_0.8.25     markdown_1.1
## [7] base64enc_0.1-3      fs_1.5.0             rstudioapi_0.13
## [10] farver_2.1.0         DT_0.20              svUnit_1.0.6
## [13] fansi_0.5.0          mvtnorm_1.1-3        lubridate_1.8.0
## [16] xml2_1.3.2           splines_4.0.5        bridgesampling_1.1-2
## [19] codetools_0.2-18     knitr_1.36           shinythemes_1.2.0
## [22] projpred_2.0.2       jsonlite_1.7.2       nloptr_1.2.2.3
## [25] broom_0.7.10         dbplyr_2.1.1         shiny_1.7.1
## [28] compiler_4.0.5       httr_1.4.2           backports_1.3.0
## [31] assertthat_0.2.1     Matrix_1.3-4         fastmap_1.1.0
## [34] cli_3.1.0            later_1.3.0          htmltools_0.5.2
## [37] prettyunits_1.1.1    tools_4.0.5          igraph_1.2.8
## [40] coda_0.19-4          gtable_0.3.0         glue_1.5.0
## [43] reshape2_1.4.4       posterior_1.1.0      V8_3.6.0
## [46] cellranger_1.1.0     vctrs_0.3.8          nlme_3.1-153
## [49] crosstalk_1.2.0      tensorA_0.36.2       xfun_0.28
## [52] ps_1.6.0             lme4_1.1-27.1        rvest_1.0.2
## [55] mime_0.12            miniUI_0.1.1.1       lifecycle_1.0.1
## [58] gtools_3.9.2         zoo_1.8-9            MASS_7.3-54
## [61] scales_1.1.1         colourpicker_1.1.1   hms_1.1.1
## [64] promises_1.2.0.1     Brodningnag_1.2-6    parallel_4.0.5
## [67] inline_0.3.19        shinystan_2.5.0      gamm4_0.2-6
## [70] yaml_2.2.1           curl_4.3.2           stringi_1.7.5
## [73] dygraphs_1.1.1.6     checkmate_2.0.0      boot_1.3-28
## [76] pkgbuild_1.2.0       rlang_0.4.12         pkgconfig_2.0.3
## [79] matrixStats_0.61.0   distributional_0.2.2 evaluate_0.14
## [82] lattice_0.20-45      labeling_0.4.2       htmlwidgets_1.5.4
## [85] rstantools_2.1.1     processx_3.5.2       tidyselect_1.1.1
## [88] plyr_1.8.6           magrittr_2.0.1       R6_2.5.1
## [91] generics_0.1.1       DBI_1.1.1            mgcv_1.8-38
## [94] pillar_1.6.4         haven_2.4.3          withr_2.4.2
## [97] xts_0.12.1          abind_1.4-5          modelr_0.1.8
## [100] crayon_1.4.2         arrayhelpers_1.1-0   utf8_1.2.2
## [103] tzdb_0.2.0           rmarkdown_2.11       grid_4.0.5
## [106] callr_3.7.0          threejs_0.3.3        reprex_2.0.1
## [109] digest_0.6.28        xtable_1.8-4         httpuv_1.6.3
## [112] RcppParallel_5.1.4   stats4_4.0.5         munsell_0.5.0
## [115] shinyjs_2.0.0

```
